# Supplementary material
Source: HighWire-hosted journal article supplement (doi:10.1101/rna.067884.118)
Supplement: Supplemental_SMARTT_Data.xlsx [file Supplemental_SMARTT_Data.xlsx]

## Sheet: Replicate A (Full Titration)
Variant	K	K (SD)	Ymin	Ymin (SD)	Ymax	Ymax (SD)	Amp	Amp (SD)	Mean Gly Reads		Variant	Reads - 0 M Gly	Percent FL - 0 M Gly	Reads - 30 uM Gly	Percent FL - 30 uM Gly	Reads - 90 uM Gly	Percent FL - 90 uM Gly	Reads - 225 uM Gly	Percent FL - 225 uM Gly	Reads - 550 uM Gly	Percent FL - 550 uM Gly	Reads - 1.25 mM Gly	Percent FL - 1.25 mM Gly	Reads - 2.75 mM Gly	Percent FL - 2.75 mM Gly	Reads - 6 mM Gly	Percent FL - 6 mM Gly	Reads - 12.5 mM Gly	Percent FL - 12.5 mM Gly	Reads - 25 mM Gly	Percent FL - 25 mM Gly	Reads - 50 mM Gly	Percent FL - 50 mM Gly	Reads - 100 mM Gly	Percent FL - 100 mM Gly	Reads - 100 mM Ala	Percent FL - 100 mM Ala
WT	0.000448155	2.66917e-05	7.41079	0.498235	65.1128	0.64793	57.702	0.817344	2524460		WT	3470655	7.77441	1994027	10.488	3506389	16.9089	2471054	25.8331	3464889	38.4802	3892894	51.9172	1821554	57.3599	1592879	60.3786	1760329	64.0306	1651362	65.0848	2357205	62.7486	2310283	64.3222	2098371	9.46224
A-1C	0.00165031	0.000359813	38.1893	1.16442	69.231	1.25911	31.0417	1.715	900.833		A-1C	1166	39.3654	577	35.8752	1194	38.7772	840	43.4524	1202	46.173	1421	52.7094	782	56.266	595	58.3193	694	66.5706	577	71.0572	875	66.8571	887	68.7711	644	31.3665
A-1G	0.000711919	8.68074e-05	6.47729	0.826475	59.3051	1.36197	52.8278	1.59312	5559.08		A-1G	7764	6.98094	4569	7.92296	8556	12.237	5354	19.0138	7261	28.3845	8565	41.296	3969	48.7024	3308	55.4111	3858	58.2426	3519	61.9778	5251	52.809	4735	59.1763	4201	7.3792
A-1T	0.000762503	5.4903e-05	9.49143	0.581466	68.7336	0.859492	59.2422	1.0377	17269.4		A-1T	27248	9.8576	13886	11.4432	26609	15.833	17335	22.0075	23061	32.5745	24544	48.2399	13465	57.3561	9510	61.693	11188	67.2506	10490	67.836	15503	66.413	14394	66.6458	13350	10.6816
T1A	0.000394881	3.02354e-05	7.91104	0.707926	71.8477	0.860036	63.9366	1.11392	13394.6		T1A	20511	8.4345	10682	11.8985	19860	18.8268	12617	30.2608	16788	45.0143	19374	58.9863	10695	64.2169	7908	65.4274	9443	71.7357	8626	72.1887	12342	70.6368	11889	69.1732	10589	11.2947
T1C	0.0006134	4.3447e-05	6.23791	0.585556	71.0347	0.906802	64.7968	1.07943	4900.08		T1C	7576	6.81098	3821	8.715	7497	13.7788	4707	22.9021	6589	36.4243	7010	51.2553	4043	59.8318	2779	65.5632	3382	70.7274	2929	70.8091	4267	68.5259	4201	67.9124	4051	8.24488
T1G	0.000797957	9.24455e-05	7.11705	0.874623	66.6733	1.42778	59.5563	1.67437	658.333		T1G	933	7.28832	562	10.1423	1037	11.9576	627	21.0526	887	31.2289	956	44.5607	516	52.907	426	55.3991	421	68.6461	412	60.4369	560	66.9643	563	65.897	568	8.27465
C2A	0.000959683	6.33346e-05	7.79713	0.407815	55.4281	0.690652	47.6309	0.802068	5982		C2A	8534	8.27279	4516	9.0124	8630	11.5064	5799	16.5891	7875	24.1524	9041	35.8367	4973	43.9373	3648	48.1634	4171	53.5843	3731	55.1863	5561	53.6055	5305	53.4025	4421	8.05248
C2G	0.0010334	9.85023e-05	6.19496	0.503287	50.2465	0.969874	44.0515	1.09268	1028.83		C2G	1453	5.84997	759	8.43215	1605	10.2804	966	12.2153	1327	22.3813	1572	30.2163	839	39.4517	586	42.3208	723	44.8133	655	49.9237	931	48.1203	930	51.5054	744	8.73656
C2T	0.000874617	8.98813e-05	8.21131	0.677289	57.0316	1.07348	48.8203	1.26928	4757.92		C2T	6847	8.96743	3464	9.1224	6716	12.5223	4580	17.3799	6529	26.007	7147	37.7781	3615	47.6072	2992	50.7687	3430	57.6968	3029	55.5959	4502	54.6646	4244	53.9585	3761	7.7373
T3A	0.000969778	5.60889e-05	9.58046	0.284783	43.5179	0.436535	33.9374	0.521214	7930.92		T3A	10191	9.50839	5709	10.4221	10840	12.6661	7387	16.5832	11049	20.8888	12870	29.2463	6951	34.9878	5223	38.0624	5677	41.7474	4909	41.1082	7274	43.0987	7091	43.3507	6147	8.21539
T3C	0.00143895	0.000197011	6.69762	0.394289	28.4638	0.726151	21.7662	0.826293	7220.5		T3C	9502	6.09345	4811	7.10871	9433	8.89431	6622	9.95168	9811	12.435	11792	17.1642	6802	20.3029	4749	24.1735	5309	25.146	4817	25.6591	6553	27.9872	6445	30.3646	5299	6.45405
T3G	0.0017625	0.000410682	5.74417	0.748918	32.8441	1.63427	27.0999	1.7977	772.917		T3G	1005	5.37313	523	5.16252	1019	7.85083	676	10.6509	1026	11.5984	1373	17.2615	694	23.9193	530	22.4528	572	27.4476	471	32.2718	724	30.1105	662	37.1601	605	6.44628
A4C	0.000972718	0.000227939	13.4389	0.864469	35.8151	1.0679	22.3763	1.37394	1237.75		A4C	1590	13.6478	742	11.8598	1531	16.1986	1158	18.8256	1660	21.3253	1897	25.1977	1117	31.692	861	31.7073	915	32.6776	894	35.6823	1253	33.0407	1235	38.7854	904	10.177
A4G	0.000967809	6.76579e-05	7.5375	0.391204	49.5356	0.661952	41.9981	0.768909	5121		A4G	6981	7.8069	3807	8.87838	6975	10.853	4835	15.4498	7064	21.4892	8096	32.0776	4315	39.5829	3096	45.3488	3526	46.8803	3383	48.4186	4605	46.7101	4769	49.025	4226	7.6195
A4T	0.000890063	7.35207e-05	9.67005	0.425985	44.8706	0.62868	35.2006	0.759409	9787.42		A4T	13424	10.1162	6674	9.91909	12745	12.8835	8992	17.0262	13617	22.325	15377	31.3	8698	35.9393	6255	39.2966	6848	43.2389	6423	44.3407	9308	42.544	9088	45.6426	7871	8.81718
G5A	0.000823159	5.30001e-05	9.93545	0.435364	57.3163	0.64385	47.3809	0.777229	5858.58		G5A	8470	9.97639	4224	11.9792	7924	14.4498	5442	20.3785	8008	27.2478	9129	39.851	5183	46.7876	3721	52.4321	4072	54.2485	3648	57.0998	5421	55.4879	5061	56.1352	4639	9.8297
G5C	0.000852353	0.000114315	10.2962	0.455876	32.0745	0.613387	21.7783	0.764243	1784.67		G5C	2456	10.2199	1232	9.98377	2212	13.0199	1605	15.7632	2368	18.5389	2773	23.6206	1667	24.895	1085	30.3226	1257	30.0716	1253	32.083	1842	32.519	1666	31.5726	1273	12.0974
G5T	0.000959942	6.76955e-05	7.37828	0.413978	53.1172	0.747689	45.7389	0.854645	3122.42		G5T	4850	7.7732	2184	8.4707	4263	11.1658	3091	15.6907	4436	22.6105	4856	34.5346	2760	42.2464	1766	48.4145	2077	51.0351	1890	50.7407	2659	51.5983	2637	51.2325	2421	7.68278
T6A	0.000473337	2.12995e-05	6.94576	0.359742	66.8724	0.516505	59.9266	0.629438	8734.33		T6A	13763	7.04062	6678	10.2576	12364	16.7502	8272	25.4231	11401	38.6019	12761	51.5869	7445	58.2539	5324	61.8896	5802	66.8046	5499	64.6299	7913	65.2471	7590	66.5349	7317	10.5371
T6C	0.000715945	3.3111e-05	8.18341	0.308295	56.2251	0.466064	48.0417	0.558803	7797.17		T6C	11192	8.41673	5759	9.89755	10435	13.5218	7571	19.1256	10696	28.4312	11807	39.7053	6669	46.7087	4889	51.0738	5350	54.729	5005	55.3447	7033	54.0026	7160	55.6844	6410	9.21997
T6G	0.000462647	5.41192e-05	7.77288	0.960162	66.944	1.28781	59.1711	1.60635	952.083		T6G	1483	8.36143	758	9.76253	1317	18.3751	854	25.0585	1189	37.5105	1436	54.7354	796	60.6784	651	60.8295	635	63.4646	566	66.6078	846	64.0662	894	67.1141	825	10.7879
T7A	0.000596063	3.67746e-05	7.4294	0.465961	63.4367	0.692029	56.0073	0.83428	8085.42		T7A	12365	7.72341	5928	9.61538	11195	14.8013	7489	22.1792	10823	32.9484	12030	47.1737	7073	54.0082	4957	59.0075	5566	61.6601	5011	63.2608	7179	60.8998	7409	62.1811	6612	8.99879
T7C	0.000713252	4.44243e-05	6.81766	0.417332	59.05	0.69601	52.2323	0.811539	10513.9		T7C	16165	6.79245	7842	9.42362	14445	12.6687	9797	18.7506	14249	28.3108	15898	41.6027	8944	49.2733	6489	52.3193	7101	57.0906	6699	58.2326	9395	56.2214	9143	59.2038	8536	8.21228
T7G	0.000591401	5.10904e-05	6.58404	0.641967	63.3075	0.989447	56.7235	1.17946	1290.25		T7G	1848	6.70996	986	9.02637	1915	14.4648	1230	21.626	1602	31.6479	2005	46.8329	1096	55.1095	845	59.4083	915	59.8907	793	64.9433	1117	60.8774	1131	60.8311	1137	8.00352
G8A	0.00122673	8.80062e-05	7.34878	0.352757	46.7776	0.677514	39.4288	0.763847	4604.25		G8A	6771	7.02998	3256	8.66093	6246	10.7109	4441	13.3078	6393	18.4733	7079	27.9842	4132	34.8742	2916	39.8491	3124	42.8297	2949	47.3042	3984	45.0803	3960	45.5303	3669	7.27719
G8C	0.0012438	0.000303327	7.93972	0.665424	26.825	1.06745	18.8852	1.25787	792.25		G8C	1105	8.59729	503	7.75348	954	8.28092	778	11.6967	1123	13.8023	1277	17.3062	738	22.7642	515	19.8058	541	26.6174	496	23.9919	766	26.2402	711	28.5513	612	7.51634
G8T	0.00110309	7.42492e-05	7.1745	0.313444	43.0637	0.568387	35.8892	0.649085	3459.58		G8T	4957	6.81864	2298	8.83377	4568	10.0044	3240	13.9506	4781	18.448	5410	26.1553	3206	32.8759	2116	37.6181	2454	42.4613	2176	41.0386	3089	41.5669	3220	42.236	2670	6.85393
A9C	0.00082182	0.000110018	7.34171	0.438125	29.3279	0.654892	21.9862	0.787932	1037.33		A9C	1438	7.51043	697	7.60402	1293	9.9768	918	11.329	1486	15.6797	1694	22.137	946	22.6216	688	26.1628	674	28.7834	698	29.3696	946	28.0127	970	29.5876	763	4.84928
A9G	0.00129298	6.59761e-05	7.57677	0.196607	36.572	0.350429	28.9953	0.401815	7045.75		A9G	9359	7.53286	4776	8.0402	9370	9.53042	6623	12.2301	9468	16.0435	11501	21.9807	6235	27.2494	4606	30.9162	5303	33.8865	4555	33.9846	6378	35.6068	6375	37.4588	5469	8.30133
A9T	0.00134062	5.04714e-05	7.04411	0.148359	37.8218	0.279918	30.7777	0.316803	9686.58		A9T	13314	7.19543	6661	7.83666	12964	8.63931	8820	11.712	13006	15.7235	15808	22.128	8845	27.9819	6396	32.2076	6900	34.4783	6263	35.3824	8708	37.2416	8554	37.8303	7438	7.40791
A10C	0.000395414	3.23439e-05	8.8549	0.718746	68.1147	0.853881	59.2598	1.11611	1648.17		A10C	2509	9.167	1224	12.5	2292	19.5026	1501	29.5137	2091	43.9981	2457	54.823	1420	60.5634	1062	61.6761	1163	67.7558	1030	68.7379	1527	64.2436	1502	69.7071	1372	9.5481
A10G	0.000430882	2.65289e-05	7.67534	0.506405	65.5433	0.66831	57.8679	0.838501	6018.25		A10G	9101	8.15295	4562	10.6532	8426	17.4104	5536	26.0296	7939	39.8665	9319	53.0958	5037	57.4151	3905	62.2791	4058	63.036	3734	63.9796	5380	64.4238	5222	64.7453	5036	10.0477
A10T	0.000407752	2.52981e-05	8.48611	0.529314	67.2047	0.665259	58.7186	0.850143	11602.5		A10T	18423	8.90734	8628	12.1117	15988	18.4201	10728	28.0854	15433	42.3249	17031	54.5769	9983	60.3225	7191	63.1067	7663	66.7232	7280	66.8407	10424	64.7448	10458	65.9208	9519	11.3667
G11A	0.000517168	3.44223e-05	7.1006	0.493295	63.2078	0.744203	56.1072	0.892848	4643.08		G11A	7506	7.2875	3640	9.72527	6410	15.7878	4226	22.9295	6304	34.6923	6699	49.0372	4058	54.756	2800	58.75	2888	62.8463	2898	61.6977	4099	61.3808	4189	61.8525	4251	8.30393
G11C	0.000850324	8.70185e-05	7.47793	0.630252	55.7035	1.08258	48.2255	1.25268	917		G11C	1451	7.85665	668	9.88024	1257	10.5012	823	18.5905	1206	26.6998	1428	36.7647	840	43.0952	553	50.9946	595	53.7815	581	50.6024	793	53.5939	809	57.7256	821	7.79537
G11T	0.000895786	6.47409e-05	7.75808	0.442968	54.7916	0.756852	47.0335	0.876952	5592.75		G11T	8377	7.80709	4080	9.65686	7559	11.4565	5126	17.8307	7718	25.6673	8775	35.4302	5120	41.7773	3313	48.8379	3727	53.9308	3415	55.3148	4942	51.72	4961	54.2229	4488	7.59804
A12C	0.00119896	0.000145175	7.59301	0.693775	53.0103	1.26868	45.4172	1.44599	1293.33		A12C	1836	7.57081	942	8.49257	1774	11.6122	1188	14.2256	1706	20.3986	2029	31.2469	1161	39.1042	803	47.8207	854	54.0984	827	51.8742	1211	49.0504	1189	50.6308	998	8.71743
A12G	0.000414718	3.04117e-05	7.27827	0.598702	64.7247	0.776328	57.4464	0.980373	3574.75		A12G	5090	7.89784	2860	10.1399	5090	16.9352	3181	26.8783	4438	39.9955	5865	52.6343	2868	55.1604	2317	62.1925	2465	62.5963	2253	63.5597	3186	62.4294	3284	65.1644	3037	9.61475
A12T	0.00120542	6.12862e-05	7.16585	0.268636	50.0913	0.516402	42.9255	0.582097	9695.33		A12T	14301	7.34914	6727	7.53679	13444	10.4136	9007	13.7671	13134	20.268	15394	29.8753	8694	36.0478	6020	42.4252	6576	46.5785	5801	48.1469	8619	48.0798	8627	50.7361	7794	7.17218
G13A	0.00145234	9.63374e-05	7.8055	0.306904	44.9299	0.584117	37.1244	0.659835	10210.1		G13A	14657	7.4913	6974	8.66074	13230	10.0831	9256	13.3427	13824	18.2436	15809	25.1692	9276	31.0371	6608	36.6374	6923	41.3693	6655	42.7799	9628	42.7088	9681	46.3175	7993	6.90604
G13C	0.00175539	0.000230325	9.28519	0.508306	39.1776	0.933954	29.8924	1.06332	2304.92		G13C	3213	8.96359	1480	9.12162	2984	11.0925	2070	12.8502	3194	17.3763	3609	22.056	2200	26.3636	1435	31.2195	1510	33.5762	1444	34.8338	2233	39.0058	2287	41.1893	1791	8.15187
G13T	0.00124758	0.000120846	7.09218	0.407181	40.4713	0.777499	33.3792	0.877668	4748.92		G13T	6846	6.6024	3237	8.27927	6171	9.30157	4447	13.7171	6572	17.3615	7400	24.0405	4419	28.0833	3132	34.0358	3211	37.1224	2920	39.2466	4324	39.0148	4308	42.0149	3796	6.902
T14A	0.00113335	0.000109378	8.91271	0.569512	53.9423	0.962792	45.0296	1.11862	3818.33		T14A	5633	9.14255	2717	8.87008	5067	12.9465	3524	16.2316	5059	22.7318	5778	34.7179	3440	38.2267	2340	45.7692	2563	50.2926	2429	51.8732	3584	52.3717	3686	54.8833	3146	7.59695
T14C	0.000794627	4.84728e-05	8.00367	0.431648	61.0915	0.661037	53.0878	0.789487	3683.08		T14C	5338	8.43012	2758	9.28209	4958	12.9689	3321	19.6326	4723	30.6373	5669	40.7832	3008	46.742	2478	55.5287	2561	58.3756	2412	61.194	3435	58.952	3536	60.9446	3082	8.76055
T14G	0.000604685	0.000116715	5.88445	1.19112	58.0215	2.10389	52.137	2.41766	391.583		T14G	634	5.36278	302	8.60927	564	13.8298	339	21.5339	487	30.8008	624	40.7051	302	43.0464	235	52.3404	257	53.6965	264	58.3333	355	52.1127	336	66.369	328	8.84146
A15C	0.000832255	0.000131297	5.57338	0.685588	39.3656	1.20624	33.7922	1.38746	486		A15C	678	5.89971	332	6.3253	613	8.15661	435	13.7931	655	19.2366	793	26.9861	420	28.0952	332	34.0361	363	39.6694	313	35.7827	452	37.3894	446	42.6009	362	9.66851
A15G	0.000479079	4.2112e-05	7.8295	0.679172	62.1029	0.907449	54.2734	1.13346	3354.67		A15G	4747	8.11039	2569	10.0428	4631	16.8214	3066	24.8858	4388	36.0985	5202	49.0388	2920	52.1233	2224	56.1151	2331	59.1592	2015	64.5658	3045	59.9343	3118	62.8929	2775	9.94595
A15T	0.000668938	5.02636e-05	8.99426	0.540153	59.8917	0.758617	50.8974	0.93127	8090.08		A15T	11879	8.83913	5611	10.8002	10632	15.7731	7388	21.8868	10537	31.3277	12149	43.3781	7222	47.0922	5215	54.2474	5486	58.4943	5261	60.3688	7684	57.7434	8017	60.3218	6599	9.66813
T16A	0.00101309	9.22468e-05	8.76043	0.54463	53.3434	0.889705	44.583	1.04317	6182.58		T16A	8927	8.83836	4220	9.33649	8313	12.7752	5672	16.6255	8237	24.4264	9699	34.8593	5393	38.7169	3999	45.3113	4073	49.6685	3813	52.0063	5884	51.2067	5961	55.3934	4907	8.15162
T16C	0.000804298	7.82153e-05	8.2992	0.666374	58.5277	1.00755	50.2285	1.20798	4331.58		T16C	6211	8.35614	2981	9.29218	5656	13.8614	3920	19.1327	5804	29.204	6601	39.2971	3723	45.0175	2799	50.1608	2950	57.7966	2873	58.371	4241	54.7984	4220	60.545	3524	9.27923
T16G	0.00069383	0.000111936	7.66834	1.12375	59.0396	1.6877	51.3713	2.02759	341.417		T16G	508	7.67717	232	8.62069	436	16.055	314	18.7898	424	27.8302	536	40.2985	270	54.8148	234	58.1197	254	57.4803	217	54.3779	316	57.2785	356	56.4607	289	7.95848
A17C	0.00104777	0.000154453	9.16882	0.75135	47.3517	1.22552	38.1828	1.43751	420.083		A17C	632	10.1266	314	8.59873	582	11.8557	350	16.5714	562	21.7082	614	31.9218	340	34.1176	268	39.9254	277	48.0144	282	43.2624	418	47.1292	402	47.2637	327	6.42202
A17G	0.000480253	2.26842e-05	7.38748	0.356263	62.1819	0.505883	54.7944	0.618742	3996.17		A17G	6122	7.38321	2935	10.6303	5421	16.2701	3755	24.5273	5377	35.3171	6073	48.6745	3369	53.9032	2510	58.3267	2638	60.0076	2494	60.7458	3625	60.6897	3635	62.3934	3478	8.53939
A17T	0.000675224	5.66896e-05	7.5926	0.599424	61.3846	0.921301	53.792	1.09914	4567.92		A17T	6990	7.39628	3188	9.09661	6013	15.6494	4196	20.2574	6074	31.1327	6887	43.8943	4017	48.469	2881	53.2454	3090	59.3528	2869	61.9728	4257	60.2772	4353	61.6816	3716	9.55328
A18C	0.000354008	1.91742e-05	7.82096	0.4442	65.2723	0.552064	57.4513	0.708582	3033.92		A18C	4741	7.99409	2150	11.6279	4133	19.4774	2702	30.4219	3861	42.3465	4487	53.2427	2699	58.0956	1928	61.9295	2135	65.4801	1916	66.4927	2835	62.9982	2820	64.3262	2457	11.1925
A18G	0.000553834	2.86585e-05	7.89337	0.412656	65.8698	0.58052	57.9764	0.712242	5009.67		A18G	7692	8.09932	3664	10.1528	6822	16.1243	4752	24.7264	6502	36.2042	7688	49.4537	4288	54.1978	3135	59.8724	3407	64.6903	3155	65.7052	4391	65.1332	4620	64.9784	4052	9.77295
A18T	0.000482322	2.60953e-05	7.41031	0.423908	65.1668	0.602804	57.7565	0.736933	15214.2		A18T	24424	7.71372	11340	10.2028	21102	16.3871	14078	24.968	19933	37.5056	22685	50.9632	13250	56.5887	9350	60.0856	10028	63.9908	9375	65.1627	13399	63.2137	13607	64.1361	12642	9.6741
G19A	0.000733146	3.62398e-05	7.0365	0.350541	64.0341	0.596208	56.9976	0.691623	4300.42		G19A	7233	7.00954	3216	9.60821	5922	13.1881	4022	20.6116	5673	29.9841	6366	44.4549	3839	52.2792	2482	56.6882	2774	61.6799	2508	63.1978	3842	61.9469	3728	63.7607	3452	8.08227
G19C	0.00161578	0.000337489	9.01885	1.09601	51.778	2.04054	42.7592	2.31625	498.167		G19C	769	8.45254	270	10.3704	663	11.7647	471	13.1635	650	21.5385	745	30.2013	458	30.786	287	38.3275	377	45.8886	327	56.2691	492	50.4065	469	50.3198	409	7.82396
G19T	0.00227413	0.000240684	7.13479	0.566245	59.5278	1.44546	52.393	1.55241	5902.17		G19T	9467	6.50681	4231	7.6814	8149	9.54718	5516	13.1436	8436	17.6387	9448	27.0322	5848	32.4213	3401	42.8403	3780	53.4656	3268	57.4051	4633	55.1694	4649	59.6257	4742	7.02235
A20C	0.0017957	0.000144635	8.71592	0.397747	50.6467	0.825283	41.9308	0.91613	1190.08		A20C	1859	8.01506	826	10.0484	1605	11.3396	1116	13.7097	1653	18.5723	1780	26.573	1139	31.9579	702	41.1681	753	46.7463	707	46.5347	1045	48.7081	1096	51.0036	933	9.00322
A20G	0.00293048	0.000555478	8.01705	0.819426	50.873	2.15019	42.8559	2.30103	4340.75		A20G	6273	6.72724	3122	7.9116	5881	10.1173	4084	12.0715	6152	16.4337	7149	22.6745	3973	26.3277	2891	32.3763	2929	39.9454	2505	46.3074	3569	47.8005	3561	54.1702	3462	8.14558
A20T	0.00252867	0.00023278	7.45948	0.488103	59.7679	1.24192	52.3084	1.3344	9800.58		A20T	15250	6.83934	7085	8.03105	13629	9.41375	8790	12.9352	13305	17.3995	16174	25.9552	9233	31.9073	6104	41.7267	6542	51.6509	5524	56.6256	8013	55.9965	7958	59.8769	7707	6.92877
G21A	0.0107278	0.00387182	8.19834	0.869604	44.7327	4.20389	36.5343	4.29289	4579.33		G21A	6932	6.62147	2943	6.59191	5776	8.31025	4193	9.63511	6255	12.1663	7415	14.7539	4860	16.1523	3087	21.6391	3230	24.4582	2884	28.9528	3769	36.8002	3608	46.5078	3466	6.11656
G21C	0.000220682	0.000128222	7.78693	1.29964	19.6507	1.12062	11.8637	1.71606	179.833		G21C	260	8.46154	111	8.10811	202	10.396	166	12.6506	234	18.3761	291	19.244	198	17.6768	130	21.5385	123	23.5772	107	14.0187	174	18.9655	162	19.1358	125	9.6
G21T	0.00195324	0.000732929	8.40013	0.969941	29.1698	1.95247	20.7697	2.18012	6356.67		G21T	9787	7.66323	4174	7.85817	8064	9.56101	5563	12.0618	8524	14.2539	10079	17.6506	6522	18.7059	4157	21.2653	4483	23.3103	4046	24.9382	5554	28.3039	5327	35.9302	4696	6.68654
A22C	0.00660666	0.00134737	8.07977	0.667765	51.2491	2.60748	43.1693	2.69163	995.583		A22C	1594	7.34003	681	6.90162	1362	8.14978	963	10.6957	1350	12.8889	1545	17.5405	1076	20.2602	583	26.072	702	32.3362	572	42.1329	799	45.8073	720	51.6667	748	6.01604
A22G	0.00208236	0.000213081	7.57319	0.561571	59.0048	1.31803	51.4316	1.43268	5721.08		A22G	8434	6.85321	4187	8.52639	8285	10.0664	5576	13.2174	7929	18.9305	9280	28.3082	5009	33.2402	3512	43.1378	3717	51.7084	3326	57.5466	4859	55.9169	4539	59.3523	4382	7.91876
A22T	0.00282378	0.00128581	7.1699	0.909083	24.7814	2.11492	17.6115	2.30203	10115.7		A22T	14534	6.22678	6461	6.5315	13256	7.98129	8742	9.4372	13418	11.4175	16590	14.1591	10556	14.7783	6813	16.8942	7453	17.6842	6376	20.0596	8760	24.4863	8429	30.8459	7364	6.912
G23A	0.00302963	0.00024429	7.00002	0.400178	61.4886	1.16956	54.4885	1.23613	5208.08		G23A	8583	6.54783	3883	6.87613	7724	8.739	4980	12.2289	7216	16.0615	8114	23.5889	4904	31.3622	3009	40.9438	3299	50.5608	2791	55.8939	4244	57.2102	3750	62.1867	4002	7.24638
G23C	0.00555719	0.0016639	6.84849	0.879787	45.4227	3.38489	38.5742	3.49736	965.167		G23C	1547	5.42986	701	9.27247	1387	6.48882	889	9.5613	1323	12.6228	1502	16.1784	911	19.0999	598	24.0803	666	29.5796	574	35.7143	794	40.0504	690	50	609	5.74713
G23T	0.00399206	0.00119238	7.90225	0.964239	43.4275	2.98652	35.5252	3.13832	5416.83		G23T	8301	6.84255	3614	7.30493	7651	8.12966	5176	10.8964	7446	15.1625	8774	19.2615	5362	20.4774	3344	24.073	3868	31.0496	3011	36.2006	4591	42.4308	3864	46.8168	3820	7.06806
A24C	0.000451822	3.73694e-05	7.18994	0.701516	71.2081	0.999067	64.0182	1.22076	721.333		A24C	1246	7.86517	549	10.0182	1110	16.3964	699	30.6152	907	40.9041	1034	56.0928	631	62.2821	451	67.8492	477	70.021	409	71.3936	567	68.0776	576	69.6181	573	9.07504
A24G	0.000605785	5.18496e-05	6.66773	0.624383	65.0625	1.03113	58.3947	1.20544	5647.42		A24G	9361	6.81551	4780	9.30962	8667	14.3994	5577	21.4452	7478	32.8296	7630	48.1913	4319	55.8926	3113	58.9785	3650	65.9452	3538	64.3019	5219	61.7168	4437	63.1733	4302	7.62436
A24T	0.000433236	3.30317e-05	6.40941	0.617222	70.2317	0.926679	63.8223	1.11342	14538.5		A24T	25979	6.91713	11570	9.53328	22507	16.7903	13692	27.3517	17943	41.4145	20125	56.5118	12141	62.5731	8100	64.7037	9222	70.2234	8619	70.0081	12843	67.8735	11721	67.8014	11614	9.42828
T25A	0.000548716	3.47989e-05	7.14321	0.48756	67.1968	0.756934	60.0536	0.900368	8004.83		T25A	13916	7.45904	5995	9.40784	11911	15.8593	7607	23.1366	10066	36.9263	11601	50.8146	6890	56.7925	4604	60.8601	5145	64.6064	4806	67.8943	6996	66.8525	6521	64.8827	6309	8.32145
T25C	0.000588713	3.93995e-05	7.79433	0.538359	68.5446	0.798393	60.7502	0.962944	6612.83		T25C	11099	8.19894	4882	9.85252	9486	15.9604	6197	23.35	8476	36.4795	9807	50.9636	5751	58.1464	3965	61.3115	4484	66.8822	3874	69.3856	5634	67.1282	5699	66.3625	5381	9.29195
T25G	0.000505216	7.05583e-05	6.41222	0.969871	60.6616	1.57132	54.2494	1.84654	573.417		T25G	988	7.08502	454	9.03084	877	13.3409	540	21.1111	777	37.323	815	44.908	459	54.6841	318	54.717	356	63.2022	342	59.9415	490	60.8163	465	54.4086	435	8.73563
C26A	0.000932343	7.32838e-05	7.26461	0.526541	62.9184	0.95186	55.6538	1.08779	3011		C26A	4899	7.16473	2300	9.43478	4548	11.9393	2828	18.8472	3895	26.7779	4386	40.9029	2508	46.252	1653	55.4144	2075	60.2892	1808	61.8363	2845	59.4728	2387	64.2229	2191	9.44774
C26G	0.00105794	0.000172071	9.61984	1.00544	57.4221	1.71717	47.8023	1.98987	413.75		C26G	658	9.87842	328	9.45122	567	13.7566	411	18.4915	557	26.5709	616	37.1753	354	38.1356	223	51.1211	262	54.9618	247	55.4656	416	53.3654	326	61.6564	292	8.21918
C26T	0.000449381	2.60398e-05	7.27336	0.440161	64.2999	0.633606	57.0266	0.771491	4855.5		C26T	8243	7.42448	3481	10.6579	7096	16.6855	4599	25.2664	6011	38.6292	6926	50.7364	4036	55.996	2786	58.6145	3368	63.7767	3016	64.1247	4649	61.6477	4055	64.7349	3662	9.88531
C27A	0.000357734	8.38164e-05	7.98698	0.623985	23.477	0.653828	15.49	0.903797	7641.83		C27A	10903	8.31881	5197	8.71657	9185	10.7131	6806	14.017	9978	17.3381	11869	20.364	7262	22.3492	4999	24.6449	5378	22.5734	5209	20.0998	7547	22.393	7369	25.2816	5554	9.39863
C27G	0.000392205	0.000105516	7.97735	0.972157	30.6269	1.18679	22.6496	1.53413	404.583		C27G	608	8.22368	260	7.69231	519	13.8728	394	15.4822	556	21.5827	636	24.6855	355	28.4507	262	28.2443	233	25.3219	251	28.2869	380	34.7368	401	31.4214	309	7.76699
C27T	0.000542617	3.78323e-05	7.56687	0.494139	61.238	0.741654	53.6712	0.891193	4022.83		C27T	6726	7.71632	2821	9.60652	5448	15.3818	3703	23.6565	5094	34.0989	5979	46.2285	3573	50.6857	2609	55.1169	2632	58.2067	2456	61.93	3579	59.0947	3654	62.9995	3401	9.55601
T28A	0.000424029	2.68074e-05	7.11469	0.509532	68.3379	0.723261	61.2233	0.88472	4557.92		T28A	7875	7.47937	3470	10.1153	6738	17.7946	4186	27.4009	5608	41.8509	6521	54.2862	3945	59.2649	2708	64.2171	3150	67.9365	2627	69.4328	3989	65.6054	3878	67.1222	3642	10.1867
T28C	0.000444591	3.1523e-05	7.44186	0.616293	70.9182	0.821815	63.4764	1.02723	5186		T28C	8477	8.16327	3933	10.0686	7617	17.4216	4846	28.0437	6351	42.6547	7637	56.2655	4520	62.1681	3172	65.227	3368	70.7542	3162	70.9677	4595	68.7704	4554	69.17	4244	9.82564
T28G	0.000449517	4.05507e-05	6.5363	0.736055	69.8117	1.08054	63.2754	1.30742	537.5		T28G	911	7.35456	447	9.61969	834	15.1079	490	29.1837	636	41.3522	802	54.1147	467	63.8116	330	65.7576	320	65.625	333	66.3664	447	70.4698	433	67.8984	419	11.9332
A29C	0.000544056	6.66301e-05	5.77429	1.01853	73.876	1.61048	68.1017	1.90553	370.417		A29C	657	6.5449	300	7.66667	515	15.1456	345	24.058	490	39.7959	536	56.7164	326	59.5092	182	68.6813	200	74	252	76.5873	339	71.9764	303	68.3168	340	12.6471
A29G	0.000469275	3.78783e-05	6.8923	0.665127	69.09	0.954084	62.1977	1.16304	5176.92		A29G	8601	7.59214	4116	9.49951	8019	16.1242	4929	26.0702	6505	40.5534	7347	54.5393	4002	59.97	2877	63.5384	3401	68.8327	3180	69.1824	4680	65.3846	4466	68.4729	3983	9.66608
A29T	0.000462588	3.56337e-05	6.30515	0.620789	71.396	0.964213	65.0908	1.14677	9301.33		A29T	17399	6.87971	7520	9.25532	14350	16.0348	9002	26.9051	11507	40.8708	12439	56.6766	7243	63.3853	4902	66.3607	5998	70.5902	5783	71.1568	8591	68.9908	6882	68.5992	7020	8.7037
T30A	0.000463776	2.93093e-05	6.77065	0.520387	70.7549	0.765147	63.9842	0.925339	13911.5		T30A	24126	7.19141	11117	9.85877	21142	16.796	13063	26.7932	17061	40.7186	19839	55.6278	11536	62.2226	7917	65.6183	8910	70.202	8377	70.3713	12210	69.0745	11640	68.2818	10866	9.67237
T30C	0.000430184	3.26152e-05	6.89781	0.629063	69.5735	0.887367	62.6757	1.08772	5672.5		T30C	9696	7.44637	4473	10.5075	8288	16.542	5322	27.0199	6984	42.626	8050	55.677	4898	62.5561	3255	64.3932	3738	67.8973	3407	70.5019	5121	67.2134	4838	67.2799	4333	10.0854
T30G	0.000486503	2.88169e-05	7.15955	0.472401	68.5572	0.700395	61.3977	0.844817	1499.25		T30G	2568	7.28193	1176	10.7993	2265	16.7329	1417	25.2646	1863	38.4326	2103	53.3048	1228	61.4821	929	64.155	1004	66.4343	884	66.2896	1308	66.5902	1246	67.8973	1248	9.29487
T31A	0.000456141	2.75371e-05	6.5754	0.50093	70.614	0.733629	64.0386	0.888337	6033.5		T31A	10206	6.79012	4539	10.553	9391	16.8246	5688	25.6681	7520	41.5426	8485	56.1344	5179	61.1122	3518	65.577	3893	69.2268	3573	70.0252	5256	69.083	5154	69.1114	4722	8.59805
T31C	0.00048025	3.29435e-05	7.24575	0.554328	68.3907	0.801202	61.1449	0.974272	6067.5		T31C	10176	7.557	4695	10.3301	9254	16.7711	5746	25.5482	7575	39.0759	8474	53.4694	5157	60.7136	3522	62.2374	3951	67.2994	3675	68.9252	5500	65.5273	5085	67.2566	4719	9.59949
T31G	0.000479825	2.79023e-05	6.96547	0.471381	70.3724	0.700902	63.407	0.844667	1731.08		T31G	2991	6.98763	1370	10.5109	2628	17.3896	1623	26.6174	2152	39.5911	2424	53.5066	1443	62.1622	980	67.1429	1149	69.6258	1049	68.6368	1493	70.1942	1471	67.0972	1303	9.66999
T32A	0.000486919	2.82641e-05	6.99462	0.466952	68.7977	0.683731	61.8031	0.827969	10150.3		T32A	17056	7.34053	7988	9.73961	14951	16.5675	9316	26.0627	12774	38.7428	14552	53.3879	8624	60.2273	5880	62.3469	6642	67.299	5985	69.1729	8837	67.0363	9199	67.5617	8249	8.7647
T32C	0.000480393	3.50381e-05	6.99612	0.597844	69.2282	0.861345	62.232	1.04849	9511.67		T32C	16041	7.55564	7319	9.76909	13862	16.2747	8870	25.4228	11841	39.6419	13701	54.8573	8205	60.5484	5530	62.9295	6310	68.4152	5681	67.9634	8355	67.4806	8425	67.822	7726	9.34507
T32G	0.000453312	3.18071e-05	6.88137	0.561122	67.0861	0.811419	60.2047	0.986539	2549.25		T32G	4220	7.39336	2004	9.88024	3788	16.2355	2450	25.1837	3224	41.067	3692	52.4919	2083	58.9054	1485	61.2795	1679	67.6593	1494	64.9933	2209	64.871	2263	66.4605	2123	10.8337
T33A	0.000434215	3.17918e-05	6.94501	0.592554	68.273	0.850215	61.328	1.03633	10792.2		T33A	18524	7.33643	8167	10.5057	15758	16.6455	10200	27.0294	13407	40.9637	15665	54.9378	9234	59.8549	6325	62.751	7070	67.5106	6503	69.4141	9533	65.3834	9120	66.886	8821	10.0102
T33C	0.00045715	3.01676e-05	7.26457	0.486293	62.2541	0.697457	54.9896	0.850252	5988.92		T33C	9872	7.67828	4432	9.70217	8324	16.062	5264	24.943	7627	36.7117	8850	49.7288	5410	53.1978	3482	58.4147	4021	61.1539	3837	62.2361	5440	59.9816	5308	61.8124	4794	8.84439
T33G	0.000527825	4.64493e-05	7.93806	0.689957	66.2443	1.00367	58.3062	1.21795	487.167		T33G	838	8.35322	364	10.989	683	15.8126	463	23.7581	622	36.8167	707	50.7779	399	61.1529	315	60.6349	326	61.9632	316	65.1899	414	65.2174	399	64.411	376	9.57447
A34C	0.000440463	9.36667e-05	8.34669	0.610333	25.3882	0.67159	17.0415	0.907491	975.25		A34C	1375	8.65455	604	9.27152	1214	10.7908	852	13.615	1246	18.138	1518	22.0685	955	22.4084	667	22.6387	678	24.6313	628	22.6115	967	25.0259	999	27.8278	697	8.03443
A34G	0.000459955	3.27083e-05	6.63372	0.5333	63.5919	0.79612	56.9582	0.958236	4424.5		A34G	7213	6.89034	3229	9.47662	6350	16.1575	4169	23.7947	5722	37.1548	6628	50.7393	3730	54.8794	2691	57.5994	2924	62.7907	2707	63.8714	3840	61.5104	3891	62.8887	3617	10.2018
A34T	0.000456008	2.95553e-05	7.50209	0.403403	53.7013	0.59419	46.1992	0.718189	11802.4		A34T	19863	7.4158	8279	10.5568	16081	15.3908	10598	22.3344	14998	32.2443	17281	42.4397	10675	46.6979	7258	48.4431	7791	52.0729	7623	52.9975	10781	51.8505	10401	55.6966	9369	8.86968
A35C	0.000495859	3.07038e-05	7.39512	0.415301	57.8203	0.628118	50.4251	0.752999	2752.42		A35C	4517	7.35001	2040	9.95098	3711	15.5753	2542	23.6035	3723	33.011	3941	44.6587	2584	48.1424	1691	53.0455	1811	57.7029	1716	57.2844	2409	56.2474	2344	58.4898	2277	9.00307
A35G	0.000464321	2.14486e-05	6.91855	0.3454	63.4916	0.510932	56.573	0.616727	7295.42		A35G	12039	7.10192	5469	10.2944	10354	15.7717	6858	24.4678	9400	37.3511	10684	49.8877	6074	54.8897	4437	59.432	4842	62.1644	4409	63.3023	6626	61.9831	6353	62.2698	6016	10.0731
A35T	0.0004608	3.69142e-05	6.68595	0.633068	68.7208	0.958803	62.0348	1.14895	12297.9		A35T	22039	7.11012	9617	9.62878	17636	16.6648	11328	25.2207	15593	39.4279	17465	55.5568	10713	59.9925	7076	63.1148	7574	67.5469	7257	68.0998	10748	66.8869	10529	67.0529	10463	9.35678
A36C	0.000461359	3.15268e-05	7.15586	0.50509	63.8754	0.750696	56.7196	0.904799	2137.17		A36C	3780	7.59259	1522	9.13272	2878	16.7477	1908	24.5807	2734	37.9298	3146	50.0954	1954	54.9642	1284	60.514	1447	63.9254	1229	62.0016	1814	61.4664	1950	63.4872	1751	9.93718
A36G	0.000492655	3.47595e-05	8.04372	0.547356	64.7956	0.773699	56.7519	0.947739	3858.67		A36G	6441	8.46142	2975	10.8235	5394	16.3144	3633	24.7454	4907	37.6605	5661	50.9627	3378	55.7134	2258	60.2303	2435	64.23	2224	64.7482	3487	61.6863	3511	64.3122	3222	9.37306
A36T	0.000436936	4.02257e-05	8.11896	0.470299	43.7462	0.644687	35.6273	0.797999	6231.92		A36T	10158	8.15121	4343	9.92402	7845	14.5698	5462	20.3588	8171	27.6343	9261	35.1582	5917	37.8739	3839	39.9844	4185	42.3895	4084	43.2909	5635	41.6681	5883	46.4219	4934	9.20146
G37A	0.000517281	4.35208e-05	7.89998	0.579405	60.3324	0.862501	52.4324	1.03905	4130.92		G37A	7338	7.87681	2767	11.0589	5459	15.2409	3625	24.7724	5020	34.4422	6130	46.3458	3969	49.0552	2458	53.9056	2727	61.1661	2459	60.7971	3855	59.2218	3764	60.0691	3324	9.89771
G37C	0.000688048	9.17605e-05	7.71317	0.854705	57.7664	1.38106	50.0532	1.62414	562.583		G37C	980	8.26531	414	7.72947	694	14.121	503	20.2783	722	30.6094	826	40.9201	530	43.7736	326	52.7607	311	53.3762	331	62.2356	564	55.4965	550	58	427	7.49415
G37T	0.00087037	8.66393e-05	8.22558	0.551539	51.6341	0.960984	43.4085	1.10801	7647.83		G37T	13145	7.71396	5417	10.6147	9764	12.5871	6909	18.0634	9963	24.6813	11524	34.7622	7223	38.4466	4465	44.1433	4947	49.3633	4623	51.0924	6775	49.5351	7019	53.7826	6043	8.68774
G38A	0.00130633	0.000192813	8.91404	0.788004	51.6527	1.4739	42.7387	1.67133	3854.67		G38A	6400	8.3125	2479	9.47963	5020	12.7291	3402	15.6379	5159	22.1748	5941	31.0554	3789	34.6266	2256	40.2482	2482	48.0258	2209	50.3848	3578	48.3231	3541	55.3234	3066	8.61057
G38C	0.00171689	0.000437872	9.50823	0.87315	36.7143	1.64206	27.2061	1.85977	301.667		G38C	508	10.4331	195	8.71795	405	10.6173	269	11.1524	377	17.5066	462	20.7792	268	27.6119	185	29.1892	199	33.1658	195	31.2821	284	33.4507	273	41.7582	259	8.88031
G38T	0.00152488	0.000350196	9.22579	0.947942	41.3544	1.80245	32.1286	2.03652	2728.75		G38T	4330	8.63741	1770	8.98305	3335	11.5142	2313	15.2616	3756	18.0511	4430	25.5982	2859	26.4428	1664	31.0096	1850	37.7838	1629	37.3849	2360	39.4915	2449	46.3046	2180	8.66972
A39C	0.00065608	8.06094e-05	8.11376	0.758558	55.1149	1.25149	47.0011	1.46343	651.167		A39C	1115	8.60987	514	8.56031	928	15.194	589	17.8268	851	28.4371	1031	41.5131	565	45.6637	342	49.4152	402	53.7313	396	55.5556	547	51.9196	534	54.8689	564	8.68794
A39G	0.000461329	3.51e-05	7.35182	0.545293	60.6367	0.7914	53.2849	0.961071	5360.42		A39G	8776	7.69143	4202	10.6616	7786	15.2453	4667	22.8841	6727	37.9961	8161	47.7883	4439	51.6107	3231	55.4937	3613	59.3689	3228	60.9046	4762	58.5678	4733	60.6381	4427	9.93901
A39T	0.000783772	5.76369e-05	6.82059	0.482052	61.2533	0.861835	54.4327	0.987488	4966.33		A39T	8818	7.16716	3650	9.23288	7035	11.3575	4501	18.5292	6232	29.3325	7280	41.3462	4460	49.4395	2815	54.1385	3137	59.1011	2927	61.1206	4479	57.2003	4262	61.9897	4021	8.33126
C40A	0.000584535	3.90988e-05	7.42206	0.440823	58.2463	0.703518	50.8242	0.830218	2693.08		C40A	4660	7.72532	1945	10.2828	3676	13.1665	2338	20.5731	3470	32.853	4095	43.2967	2585	49.0522	1616	52.0421	1775	56.1127	1533	57.3386	2381	56.0269	2243	59.3848	2135	8.8993
C40G	0.000614744	6.89775e-05	6.80692	0.695762	57.4415	1.19749	50.6346	1.38494	1405		C40G	2517	6.59515	977	9.92835	1932	12.8882	1252	22.4441	1773	29.6672	2094	41.8816	1310	46.1069	814	49.2629	948	55.1688	796	57.6633	1261	54.5599	1186	61.1298	1137	8.61917
C40T	0.00160808	0.000223722	8.41789	0.486956	36.4245	0.965566	28.0066	1.08141	11827.7		C40T	19508	8.02235	7768	8.38054	14778	10.1773	10231	13.4004	15999	15.6322	18322	21.5424	12052	23.8799	7306	29.51	7949	33.1111	7538	33.7225	10207	35.2699	10274	38.466	9221	7.23349
G41A	0.00111658	0.000120872	8.43845	0.433212	39.0686	0.773394	30.6302	0.88646	13828.7		G41A	22906	8.20746	9160	9.1048	17922	10.9809	12234	13.8957	17808	18.9746	21234	24.9976	13896	28.5622	8296	32.9918	9297	36.8721	8571	37.3352	12370	37.0493	12250	41.6653	10260	8.27485
G41C	0.00931985	0.00295922	10.322	0.811907	44.5906	3.29594	34.2687	3.39447	2040.08		G41C	3262	9.07419	1349	8.59896	2486	10.6597	1817	11.5575	2840	13.0282	3287	18.2233	2247	18.024	1323	21.8443	1336	27.1707	1199	33.1943	1732	37.9908	1603	45.2901	1441	8.53574
G41T	0.00463744	0.000977866	7.69211	0.71784	47.1905	2.38423	39.4984	2.48995	5557.83		G41T	9089	7.1515	3812	6.71563	7377	8.5265	5291	9.71461	7436	13.0178	8883	18.6311	6029	22.0435	3371	25.9864	3599	33.2315	3205	38.1903	4377	43.7971	4225	50.1302	4087	7.26694
C42A	0.00100096	0.000264377	8.89111	0.743301	28.5113	1.16331	19.6202	1.3805	2521.42		C42A	3911	8.56558	1687	8.53586	3315	11.6742	2156	11.9666	3254	16.9945	4018	20.5575	2487	19.9035	1493	24.0455	1848	28.1926	1607	25.7623	2290	29.214	2191	30.7166	1737	10.6505
C42G	0.00178241	0.000931565	8.6771	1.40351	29.5326	2.72568	20.8555	3.0658	532.833		C42G	771	6.74449	364	10.1648	677	10.7829	466	12.6609	696	15.6609	910	18.9011	549	17.122	312	21.1538	395	26.8354	351	22.792	475	29.6842	428	37.8505	393	11.4504
C42T	0.00109775	0.000144417	9.22225	0.57358	41.9972	0.982217	32.7749	1.13743	6276.42		C42T	9613	8.94622	4527	9.96245	8456	11.6722	5345	15.7717	7989	20.7035	9836	27.6942	6051	29.4827	4126	34.8037	4316	39.1103	3885	40.2574	5640	41.8972	5533	44.0087	4767	9.52381
C43A	0.000461519	9.20851e-05	8.89894	0.427855	21.4706	0.466555	12.5717	0.633035	10011.3		C43A	15171	9.0238	6223	9.04708	12066	10.9564	8716	13.5383	12974	15.7623	15524	18.2105	10334	18.7536	6636	20.7957	7091	19.5459	6493	20.268	9542	21.9032	9366	23.2436	6904	8.47335
C43G	0.000337311	9.43797e-05	9.69923	1.16049	34.1446	1.1991	24.4454	1.66871	1008.33		C43G	1380	10	610	10.8197	1289	14.8953	816	18.2598	1255	27.251	1753	29.6634	997	26.7803	647	30.9119	709	31.4528	669	34.6786	1001	37.1628	974	35.5236	708	11.2994
C43T	0.000790554	0.000183234	8.86429	0.60322	25.9754	0.842964	17.1111	1.03656	9720.75		C43T	15413	8.58366	5928	9.29487	12073	11.0246	8436	12.9801	12668	16.2141	15137	19.9313	9694	20.3115	6467	22.1587	6822	23.0431	6104	25.3604	8953	26.1923	8954	29.082	6784	9.06545
G44A	0.00381328	0.000390655	7.41557	0.452916	56.5644	1.37967	49.1488	1.45211	8580.25		G44A	14447	6.92877	5893	7.11013	11119	8.62488	7998	11.1903	11594	14.1711	13559	21.3216	8971	26.2847	5342	35.1179	5343	43.3464	4831	50.7555	7083	52.6895	6783	56.5679	6440	7.40683
G44C	0.00551767	0.00126953	9.26282	0.84667	51.5772	2.74506	42.3143	2.87267	1250.5		G44C	1971	8.01624	799	8.63579	1580	9.3038	1150	14	1808	14.2699	2005	19.7506	1357	20.8548	774	30.7494	810	36.6667	716	41.0615	1042	46.1612	994	53.4205	897	7.58082
G44T	0.000461473	0.0002103	7.0599	0.785717	17.3155	0.87859	10.2556	1.17867	7775.08		G44T	11920	7.20638	4805	6.95109	9266	8.9251	6514	10.7768	10155	12.2009	12178	15.3391	8391	15.4213	5155	15.0921	5419	16.4975	5289	13.7266	7196	18.1212	7013	21.1464	5323	7.68364
A45C	0.00197117	0.000178594	6.85078	0.491803	59.2062	1.2122	52.3555	1.30817	968.833		A45C	1708	6.85012	683	7.61347	1314	9.66514	891	11.2233	1317	17.8436	1499	27.7518	952	39.3908	576	42.7083	595	49.0756	552	58.3333	792	57.9545	747	57.8313	829	7.9614
A45G	0.00441192	0.000932582	8.65036	0.787552	49.6752	2.36895	41.0248	2.49643	6133.17		A45G	9397	7.67266	4201	7.45061	8279	9.65092	5703	11.8359	8633	14.9079	9651	20.5056	5893	21.8734	3967	27.8296	3971	38.0005	3595	44.6453	5193	45.3303	5115	50.479	4744	6.87184
A45T	0.00123373	9.78537e-05	7.92292	0.423194	52.4755	0.841798	44.5526	0.942188	10825.2		A45T	18476	7.76142	7430	8.41184	14609	11.2602	9752	15.9249	14074	21.5433	16851	30.9477	10506	36.0651	6400	44.9219	7156	49.2873	6194	52.3087	9460	49.9683	8995	52.8293	8332	7.93327
A46C	0.00196001	0.000185832	8.40703	0.536055	59.4465	1.20585	51.0395	1.31964	1974.42		A46C	3291	8.05226	1325	8.15094	2685	11.1359	1796	15.4788	2649	19.5168	3044	29.4678	2099	35.6837	1181	44.5385	1262	54.1997	1136	56.6901	1743	56.4544	1482	59.8516	1489	7.32035
A46G	0.000505424	0.000153501	7.52726	0.614042	19.5648	0.697601	12.0376	0.929352	6132.5		A46G	8775	7.60114	3949	8.05267	7364	8.98968	5331	12.0053	8226	13.8828	9610	16.6389	6012	16.0679	4085	17.4541	4257	18.2288	4274	18.4371	5947	19.3039	5760	22.8819	4362	7.29023
A46T	0.00138646	9.79892e-05	7.61442	0.393838	56.1722	0.833278	48.5578	0.921662	10088.1		A46T	17423	7.37531	6998	8.13089	13695	11.1281	9305	15.0349	13524	21.3768	15517	31.5074	9817	37.7101	5968	45.744	6425	51.144	5728	55.1152	8400	53.6786	8257	57.2363	8029	7.63482
G47A	0.00053998	0.000179706	6.64497	0.4556	14.7621	0.52067	8.11713	0.691859	6019.75		G47A	9188	6.34523	3831	7.3349	7080	8.24859	4998	9.52381	7750	9.9871	9372	13.0495	6560	12.7591	3911	13.6282	4274	13.3599	4060	13.5468	5555	15.0315	5658	16.702	4201	6.56986
G47C	0.000445046	0.000175508	6.65031	0.597599	15.4483	0.65331	8.798	0.885403	1231.5		G47C	1913	6.2206	698	8.88252	1474	8.41248	1088	9.74265	1530	10.1961	1973	14.2423	1341	14.8397	775	13.9355	913	13.9102	791	13.6536	1097	15.8614	1185	16.8776	853	6.91676
G47T	0.000321086	9.27959e-05	7.37863	0.588644	19.1863	0.599559	11.8077	0.840222	9064.08		G47T	14078	7.55079	5377	7.88544	11001	9.86274	7499	12.615	11613	14.1652	14237	17.7917	9428	17.7662	5917	17.5934	7080	20.9746	5874	16.1049	8408	19.2317	8257	19.8983	6060	7.09571
G48A	0.000478391	0.000122372	7.03942	0.39484	16.1072	0.431873	9.0678	0.585161	8514.08		G48A	13059	7.05261	5385	7.87372	10110	8.13056	7118	10.2557	10971	11.7036	12921	14.2559	9056	13.7699	5441	15.6956	6083	16.1269	5894	14.0652	8076	16.679	8055	16.9336	5812	7.24363
G48C	0.000738275	0.00018147	6.99468	0.474051	19.4879	0.644927	12.4933	0.800409	1951.92		G48C	3003	6.26041	1208	8.77483	2364	8.92555	1714	10.9102	2404	11.9384	3051	14.7493	2002	15.7343	1275	18.1961	1381	18.6097	1323	18.1406	1894	21.2777	1804	19.3459	1264	7.99051
G48T	0.000365101	7.85631e-05	6.30447	0.382275	16.827	0.409262	10.5225	0.560027	9027.58		G48T	13746	6.40186	5691	7.08136	11068	8.25804	7456	9.8176	11427	12.838	14067	15.2911	9669	15.1515	5782	14.4933	6676	16.447	5934	15.7904	8445	16.8857	8370	18.1481	6035	7.50621
G49A	0.000944497	0.000197588	6.32817	0.424916	20.3329	0.644882	14.0047	0.772287	6024.67		G49A	9295	6.62722	3797	6.08375	7403	7.29434	5148	9.24631	7845	11.7527	9005	14.8251	6336	15.8144	3769	16.5296	4176	20.7615	4138	18.5355	5747	21.9245	5637	19.9219	4399	6.27415
G49C	0.000514187	0.000180971	6.70076	0.600102	17.0544	0.706544	10.3536	0.926999	1512.17		G49C	2326	6.57782	921	7.49186	1834	8.17884	1323	10.5064	1971	11.6185	2293	14.6097	1638	15.0794	946	13.7421	1065	17.277	1021	14.3976	1421	18.9303	1387	18.4571	1028	7.87938
G49T	0.000137412	1.25434e-05	7.95152	0.588256	54.0736	0.681958	46.1221	0.900617	3690.58		G49T	6815	7.76229	2524	17.0365	4708	27.5701	3148	35.4828	4689	43.0795	5458	49.432	3583	50.0977	2064	53.343	2548	56.4364	2296	55.5749	3198	53.127	3256	54.7297	2931	8.90481
A50C	0.00145981	0.000159907	7.21452	0.328806	30.9496	0.633116	23.735	0.713407	1829.33		A50C	2880	6.97917	1218	7.47126	2345	9.08316	1658	10.193	2376	13.9731	2753	19.0338	1878	20.6603	1121	26.405	1261	28.073	1194	30.1508	1642	30.9379	1626	30.6888	1232	7.79221
A50G	0.00166736	0.000302179	9.06481	0.496995	29.5714	0.887607	20.5066	1.01728	10432.7		A50G	14937	8.53585	7046	8.52966	13724	10.7622	9385	12.4454	14184	14.6151	16172	18.6557	9839	19.2804	6775	24.0886	7230	27.4412	6858	27.7632	9677	29.875	9365	29.9626	7678	8.62204
A50T	0.00139656	0.000533908	7.55771	0.623253	19.0429	1.00777	11.4851	1.18492	14360.5		A50T	22109	7.19616	8936	7.44181	18260	8.31873	12325	9.70385	18604	11.5728	21848	14.102	15142	13.2083	9247	14.9995	10162	16.1878	9413	17.2634	13333	20.4305	12947	21.3717	9652	6.79652
C51A	0.00342328	0.000785974	8.31302	0.796344	43.9195	2.24151	35.6065	2.37877	2242.75		C51A	3743	7.24018	1558	7.638	2917	10.0788	2047	11.0405	3088	14.8316	3545	20.5924	2303	21.5371	1293	26.6048	1497	34.0013	1303	38.8335	1906	42.5498	1713	45.8844	1699	6.76869
C51G	0.0010748	0.000426952	9.42477	0.864368	23.9271	1.26694	14.5023	1.53371	1570.17		C51G	2433	8.67242	1053	8.83191	1953	12.7496	1378	12.5544	2004	13.6228	2356	18.5484	1609	17.5264	1073	22.5536	997	19.4584	996	22.3896	1508	24.4695	1482	26.5857	1121	7.4041
C51T	0.000526002	0.000156759	7.37748	0.582043	19.3623	0.691788	11.9848	0.904071	9042.5		C51T	13731	7.48671	5918	7.33356	11139	9.30066	7624	11.2539	12142	13.5398	13399	16.8968	9274	14.8372	5652	17.6398	6415	19.5168	6261	18.0003	8563	20.5068	8392	20.4957	6327	8.26616
A52C	0.000372851	0.000167773	7.21755	0.698575	15.9684	0.679458	8.75081	0.97451	1622.25		A52C	2399	8.04502	1044	6.32184	1950	8.82051	1383	9.39986	1987	14.3432	2567	14.18	1709	14.1018	1042	15.0672	1186	14.3339	1116	14.7849	1506	16.9323	1578	16.9835	1118	6.52952
A52G	0.000398581	0.000120728	7.2317	0.52917	17.2039	0.547548	9.97222	0.761465	11051.2		A52G	15737	7.14876	7195	7.67199	13866	9.48363	9590	10.8759	14815	12.6763	16500	15.6242	11025	14.4671	7250	15.9586	7594	16.4867	7730	15.3299	10698	18.7605	10614	18.4473	7963	7.59764
A52T	0.000397517	0.000117047	6.95776	0.40871	14.8822	0.4152	7.92444	0.58261	16204.8		A52T	24560	6.97883	10186	7.18633	19728	8.47019	13542	10.3604	21059	11.3776	24221	13.3314	17004	12.7205	10672	14.3928	11698	14.0024	11288	13.6162	15099	16.3256	15401	15.6678	10983	7.01083
A53C	0.000207468	8.12187e-05	7.16346	0.624476	15.6695	0.525186	8.50606	0.81596	1673.25		A53C	2503	7.43108	1004	7.07171	2076	9.9711	1394	12.0516	2148	13.0354	2536	15.4574	1772	13.4312	1100	14.9091	1188	14.3939	1194	14.9916	1518	16.2714	1646	17.5577	1194	7.20268
A53G	0.000423425	0.000105683	8.28922	0.422705	17.7698	0.426923	9.48062	0.600785	8128.42		A53G	11723	8.30845	5056	8.38608	10152	10.5299	7027	10.9862	10580	13.6673	12813	16.0306	8091	15.6717	5502	15.8488	5929	16.9506	5566	17.0859	7543	18.9977	7559	18.3225	5599	7.94785
A53T	0.00101072	0.000262363	9.04223	0.543471	22.8334	0.779227	13.7912	0.950029	11699.2		A53T	18205	8.7833	7335	8.62986	14417	10.668	9904	12.3183	15102	14.2431	17934	17.2243	12406	17.5399	7678	18.8461	8274	20.5825	7715	21.9443	10666	24.7515	10755	23.7936	8233	7.98008
T54A	0.000798435	7.87181e-05	8.91	0.419891	39.622	0.657251	30.712	0.779928	8412.25		T54A	13608	8.95797	5630	9.04085	11168	12.4731	7309	16.0213	10759	21.6563	12718	28.0862	8288	30.9604	5158	34.8391	5939	37.1275	5280	38.6742	7588	38.9562	7502	41.6156	5825	9.5794
T54C	0.000674608	4.23332e-05	7.94237	0.43195	60.9074	0.694749	52.9651	0.818081	5261.17		T54C	8882	7.8023	3690	9.7561	7109	15.3186	4944	20.7524	6858	30.6066	7792	43.5318	4967	49.7282	3139	54.0937	3525	59.9433	3227	59.8698	4647	58.9628	4354	61.1851	3952	9.66599
T54G	0.00061183	0.000119895	11.47	1.46219	59.3823	1.78218	47.9123	2.30524	920.333		T54G	1303	11.0514	575	14.2609	1172	17.4061	840	25.7143	1236	35.5178	1442	43.4119	838	45.1074	586	54.2662	682	58.651	577	62.0451	879	53.1286	914	64.0044	626	13.4185
C55A	0.0012763	0.000116516	10.0036	0.373146	40.4818	0.654572	30.4782	0.75346	9937.92		C55A	16056	9.65994	6584	10.9964	13169	12.2181	8929	14.8953	13137	19.2738	15429	25.6335	9831	28.7967	6154	35.3429	6715	38.1683	6008	40.8788	8699	38.5677	8544	40.5431	7120	9.55056
C55G	0.000807328	9.19875e-05	8.72321	0.665375	53.6346	1.1355	44.9114	1.31608	1197.92		C55G	2067	8.12772	795	10.0629	1648	15.0485	1082	19.0388	1593	25.9259	1817	36.929	1186	40.4722	688	47.5291	740	52.7027	719	54.242	1030	50.9709	1010	54.8515	895	7.48603
C55T	0.000469756	1.89802e-05	7.34	0.284336	62.0908	0.434809	54.7508	0.519524	5100.25		C55T	9308	7.40223	3611	11.0219	7220	15.554	4543	25.1156	6358	36.7254	7252	48.0971	4722	53.3884	3025	58.843	3455	60.3473	2991	60.3811	4535	60.3087	4183	62.8496	3848	10.1351
T56A	0.000556716	2.6764e-05	8.51248	0.328255	59.5668	0.491501	51.0543	0.591037	10499		T56A	18457	8.53335	7307	10.9895	14566	15.9618	9379	22.1772	13236	33.8697	15180	44.8946	9952	50.0402	6137	53.984	7158	58.019	6369	60.0408	9325	58.7989	8922	58.5967	7874	10.1727
T56C	0.000582883	3.50342e-05	7.57597	0.452396	65.7886	0.699406	58.2127	0.832965	5639.25		T56C	9788	7.76461	4144	11.0763	7899	14.4069	5044	23.2355	7117	35.7735	8368	48.2911	5380	56.7844	3384	58.4811	3780	63.8889	3239	66.5638	4857	64.0725	4671	64.2689	4377	9.29861
T56G	0.000635586	7.04117e-05	7.04466	0.758172	60.7149	1.23618	53.6702	1.45016	1654.17		T56G	2813	7.53644	1235	8.82591	2312	13.019	1623	21.7498	2106	29.4397	2378	45.7527	1367	51.9386	967	52.2234	1145	60.6987	990	57.2727	1465	60.4778	1449	59.0752	1351	8.51221
A57C	0.00157499	0.000175895	9.17538	0.723003	61.821	1.36872	52.6457	1.54794	582.5		A57C	913	8.87185	364	9.61538	772	14.1192	578	14.5329	778	21.2082	924	34.632	544	40.2574	359	51.2535	418	58.3732	353	58.9235	483	60.2484	504	59.5238	451	11.0865
A57G	0.000450356	3.39929e-05	7.33748	0.580649	65.0254	0.844567	57.6879	1.02491	6400.92		A57G	10985	7.43741	4676	11.1634	9204	16.721	5978	25.1924	8334	38.9729	9294	51.8507	5453	55.8958	3607	58.9409	4100	65.122	3994	65.5483	5739	61.8226	5447	65.1551	5068	8.9779
A57T	0.00044566	3.33621e-05	7.77575	0.528287	60.9613	0.774282	53.1855	0.937336	9514.5		A57T	17164	8.07504	6827	10.81	13481	16.0893	8471	24.8613	11713	37.2577	13825	49.3888	8824	51.9266	5648	55.1169	6408	59.7222	5663	61.222	8400	59.0595	7750	61.4581	7305	9.48665
T58A	0.000532742	4.65904e-05	8.67442	0.324967	33.6222	0.438878	24.9478	0.546093	13028.5		T58A	20950	8.51074	8437	9.87318	16916	12.6862	11319	16.2735	16507	21.5787	19647	26.0752	13103	28.0089	8183	31.5532	9259	32.3253	8249	32.9858	12223	33.2815	11549	35.2411	8982	9.15164
T58C	0.000452525	2.16461e-05	8.0936	0.319121	57.8162	0.465033	49.7226	0.563999	6438.58		T58C	11327	8.04273	4519	11.1529	9070	16.6593	5675	24.1938	7961	35.1966	9451	45.4343	6130	49.739	3726	52.3886	4293	56.5339	3908	57.2671	5805	56.7786	5398	58.9848	4836	9.59471
T58G	0.000529403	4.80207e-05	8.9048	0.394266	38.6424	0.539634	29.7376	0.66832	1667.08		T58G	2661	9.01917	1128	9.66312	2264	13.4276	1426	18.2328	2103	24.7741	2494	28.9495	1625	33.5385	1053	34.9478	1115	36.861	1077	39.0901	1584	37.6894	1475	40.339	1223	8.34015
G59A	0.000536187	5.33281e-05	7.60841	0.277578	25.8311	0.363234	18.2227	0.457152	7548.17		G59A	11743	7.35757	4619	8.87638	9749	10.5344	6332	13.1712	9490	16.9968	11801	20.0661	7713	21.8462	4883	25.2304	5536	24.7471	4908	24.511	6947	26.5006	6857	26.3526	5222	7.6599
G59C	0.000524649	0.000150368	7.46809	0.65267	21.6415	0.794076	14.1734	1.02788	2103		G59C	3216	7.61816	1283	8.26189	2633	9.267	1761	10.9029	2761	16.2622	3211	17.0975	2280	18.0263	1367	22.8969	1538	20.2211	1345	20	1961	20.3468	1880	24.3617	1452	6.74931
G59T	0.000720841	5.07108e-05	7.13026	0.38203	49.5511	0.662539	42.4209	0.76479	1912		G59T	3176	7.33627	1270	7.40157	2611	12.4473	1786	17.7492	2574	25.4079	2902	34.0455	1842	40.3909	1119	42.4486	1294	47.2952	1147	49.5205	1634	49.082	1589	49.9685	1429	6.85794
T60A	0.000591133	5.20301e-05	8.07597	0.390748	39.8453	0.583157	31.7693	0.701965	12048.3		T60A	19704	8.18108	8115	9.27911	16197	12.1751	10789	17.1008	15200	23.1645	17902	30.9072	12008	32.1536	7473	36.2773	8520	37.6761	7478	38.7671	10936	40.3255	10258	40.7974	8486	8.79095
T60C	0.000481522	6.88919e-05	7.87745	0.386402	24.9996	0.481578	17.1221	0.617433	7581.5		T60C	11813	7.61873	4647	8.8229	9682	11.2683	6466	13.656	9767	16.3203	11744	20.5978	7906	21.5785	4820	23.7967	5537	24.1466	4890	22.9448	6882	26.0099	6824	25.9379	5027	7.87746
T60G	0.000540238	7.96063e-05	7.7633	0.413503	25.9516	0.5338	18.1883	0.675223	2547.92		T60G	3994	7.93691	1562	7.74648	3320	10.753	2204	13.4301	3176	15.995	3828	21.7085	2596	21.7643	1656	25.3623	1877	24.5605	1738	25.3165	2340	25.641	2284	26.4448	1782	8.02469
T61A	0.000410982	4.70914e-05	8.50722	0.42262	32.6803	0.531316	24.1731	0.678899	13656.4		T61A	21796	8.24004	8705	10.1436	17609	13.5499	11622	17.4927	17163	22.0474	20990	26.7032	14370	27.7105	8494	30.3862	9750	31.6205	8955	32.1943	12477	33.2772	11946	34.4718	9647	8.70737
T61C	0.000362335	2.30347e-05	8.65582	0.443904	57.6454	0.576994	48.9896	0.727993	7677.33		T61C	12917	8.67849	5486	12.304	10397	18.4188	6853	27.4624	9555	37.7394	11366	47.8269	7292	50.9051	4616	53.4229	5302	55.2244	4856	56.1161	6814	56.8829	6674	59.979	5730	10.2269
T61G	0.000326229	4.17689e-05	7.50451	0.533395	35.5741	0.679092	28.0696	0.863526	2547.5		T61G	4093	7.35402	1735	9.74063	3323	14.3545	2192	18.4763	3261	25.759	3882	29.1087	2511	30.0677	1592	36.3693	1813	33.5356	1657	36.2704	2295	36.7756	2216	35.8303	1878	8.89244
T62A	0.000324713	1.86636e-05	7.49975	0.456064	66.8539	0.611259	59.3542	0.762648	6332.5		T62A	11624	7.67378	4458	11.9336	8809	20.3088	5528	31.0058	7692	44.5398	9216	56.6732	5920	59.7973	3783	61.6442	4101	65.7401	3794	67.7122	5527	66.3108	5538	65.6374	5019	10.8986
T62C	0.000344006	1.20391e-05	8.17172	0.283738	67.4325	0.370416	59.2608	0.466599	6194.67		T62C	11241	8.22881	4455	13.0415	8527	20.1712	5350	30.8972	7780	45.3085	8855	55.1101	5754	60.3059	3690	63.3875	4093	66.6015	3803	68.0252	5485	66.0164	5303	66.9998	4683	10.6342
T62G	0.000347611	5.33811e-05	13.2642	1.48727	73.2154	1.47365	59.9512	2.09371	1001.75		T62G	1683	13.5472	731	16.0055	1323	26.9085	852	36.2676	1258	50.318	1496	61.8984	967	59.8759	591	67.8511	746	75.4692	641	75.195	891	74.0741	842	70.19	746	14.2091
A63C	0.000469601	6.85168e-05	7.40104	1.14	67.7939	1.72113	60.3928	2.06444	459.917		A63C	905	7.62431	312	13.141	609	15.2709	436	24.3119	593	40.1349	630	56.8254	439	55.3531	246	63.4146	286	68.5315	281	68.3274	367	63.7602	415	66.2651	359	12.8134
A63G	0.000370581	2.59502e-05	6.69038	0.439728	53.0279	0.62815	46.3375	0.766768	4625.42		A63G	7507	6.83362	3274	9.80452	6696	15.4869	4174	24.4609	5715	34.1907	6821	43.7473	4169	45.3826	2683	49.5714	3210	51.9938	2917	55.0223	4251	52.7405	4088	51.6145	3385	9.57164
A63T	0.000606656	3.49745e-05	6.39111	0.389028	63.0595	0.685154	56.6684	0.787895	7255.5		A63T	13518	6.42847	5246	9.13077	10129	13.5255	6697	22.0994	9243	32.1757	10488	45.9764	6498	51.6774	4132	57.8654	4671	62.9416	4212	62.7255	6214	61.0718	6018	61.6484	6021	7.37419
T64A	0.000428206	2.53878e-05	6.55151	0.439786	65.8376	0.675916	59.2861	0.806396	8452.67		T64A	15470	6.81965	6378	9.72092	12114	16.5759	7511	26.8806	10487	38.9053	11862	52.6724	7684	57.6913	4951	61.5633	5427	65.8743	5030	65.5666	7426	64.2338	7092	63.8466	6776	8.94333
T64C	0.000315527	2.10019e-05	9.67255	0.609821	71.904	0.69489	62.2315	0.924529	7443.5		T64C	13212	9.88495	5371	14.3176	10178	23.6196	6519	34.6986	9374	48.4105	10730	61.8173	6888	64.5616	4416	67.2781	4998	71.0684	4498	72.8991	6603	69.847	6535	71.4461	5794	12.651
T64G	0.000421862	7.93136e-05	7.02916	1.52148	68.7085	2.14003	61.6794	2.62576	525.833		T64G	940	7.76596	402	10.199	730	16.0274	442	29.1855	673	40.7132	740	56.6216	477	60.587	330	63.9394	326	73.6196	360	69.7222	475	58.3158	415	68.9157	405	10.1235
C65A	0.00111448	7.6078e-05	6.71186	0.318934	46.2017	0.64928	39.4898	0.723384	3608.92		C65A	6010	6.55574	2519	7.78087	4953	9.85261	3344	13.6962	4730	19.408	5450	28.5138	3511	33.0105	2172	39.5488	2374	42.5442	2153	47.0506	3120	44.9679	2971	45.7085	2706	7.8714
C65G	0.000718233	6.5638e-05	6.79253	0.512593	50.6486	0.879676	43.8561	1.01813	914.417		C65G	1401	6.28123	611	10.311	1237	11.3985	803	18.5554	1239	26.473	1411	33.5223	902	39.5787	614	47.2313	615	50.0813	565	48.4956	841	49.7027	734	51.3624	672	8.63095
C65T	0.00114497	8.70165e-05	6.04152	0.339612	44.8217	0.729401	38.7802	0.804588	4263.92		C65T	7266	5.7253	2833	7.27144	5668	9.66831	3986	11.992	5673	18.5969	6512	26.5663	4232	31.9234	2553	38.6212	2761	44.3318	2530	43.3597	3603	44.0466	3550	43.1549	3098	6.10071
C66A	0.00137601	0.000111859	6.823	0.324387	41.0003	0.696571	34.1773	0.768399	9138.17		C66A	15163	6.42353	6592	7.88835	12101	9.28849	8318	12.1183	12100	16.4215	13675	23.8172	9407	27.4051	5634	34.7888	5884	38.9531	5445	39.5776	7687	40.2888	7652	40.2378	6691	6.576
C66G	0.000513475	8.17263e-05	6.43824	0.803639	47.017	1.36526	40.5788	1.58423	1501.33		C66G	2611	5.85982	1109	9.91885	2048	13.7207	1354	18.4638	1894	27.3495	2175	35.8161	1414	36.9873	927	40.5609	984	41.9715	923	50.4875	1285	49.1829	1292	48.3746	1137	7.38786
C66T	0.00111082	8.91218e-05	6.31612	0.345969	43.2062	0.724217	36.8901	0.802611	6387.08		C66T	10661	6.04071	4561	6.97216	8611	9.63883	5961	13.4541	8516	18.2245	9625	26.4312	6191	30.1082	3795	38.2345	4125	39.9758	3827	41.965	5430	42.3941	5342	43.6915	4842	6.40231
C67A	0.00125148	0.000128416	7.11122	0.438275	43.1214	0.907521	36.0102	1.00781	4336.17		C67A	7072	6.91459	3377	7.8472	5764	9.69813	3913	13.4424	5731	17.8503	6507	25.7108	4348	29.7838	2722	36.3703	2877	41.7101	2630	44.7529	3599	41.2337	3494	41.4997	3117	6.80141
C67G	0.00143686	0.000189076	7.11459	0.518887	40.7517	1.11069	33.6371	1.22592	1095.67		C67G	1949	8.05541	756	6.48148	1457	8.92244	1037	11.0897	1437	15.7272	1629	23.3272	1094	30.5302	649	35.4391	700	36	642	38.162	898	37.3051	900	42.6667	820	6.46341
C67T	0.000967083	7.30329e-05	6.39524	0.370135	48.147	0.75088	41.7517	0.83715	5432.42		C67T	9499	6.15854	3865	8.25356	7447	10.6217	4933	13.136	7061	21.0877	8176	30.9809	5176	36.0124	3345	43.1091	3385	46.3811	3108	47.4582	4599	47.7495	4595	45.963	4181	7.39058
A68C	0.000204798	2.04069e-05	18.0958	1.02404	74.0849	0.790983	55.9891	1.29395	1534.58		A68C	2639	18.4161	1046	21.8929	2091	37.3505	1337	48.9155	1870	57.1123	2296	65.5923	1434	68.9679	965	72.8497	1015	72.6108	972	75.823	1425	73.8947	1325	74.4906	1141	22.8747
A68G	0.00049123	2.74284e-05	7.11476	0.430247	65.8035	0.640879	58.6888	0.771906	7037		A68G	11698	7.23201	5300	10.3774	10070	16.2066	6635	25.0188	9083	36.6068	10119	51.4379	6296	56.9886	4274	61.6986	4698	64.7935	4215	64.3416	6124	64.3207	5932	64.4471	5789	8.72344
A68T	0.000362655	2.24007e-05	7.57196	0.483495	66.2289	0.668557	58.657	0.825067	10046.4		A68T	18549	7.87104	7255	11.2888	14094	18.9088	9131	29.0768	12400	42.9677	14195	55.0687	9193	59.2298	5845	60.9923	6445	65.6788	6070	66.9193	8749	64.2702	8631	65.23	8045	10.0559
A69C	0.00029427	2.37243e-05	21.3249	0.757287	72.286	0.619719	50.9611	0.978537	1381.42		A69C	2420	21.7769	949	24.3414	1798	32.703	1265	45.9289	1717	53.9313	1968	62.0427	1260	67.1429	863	69.8725	912	71.3816	882	74.0363	1297	71.9352	1246	70.8668	1076	25.0929
A69G	0.000364842	2.05005e-05	7.76391	0.436532	64.122	0.583144	56.3581	0.728435	7441.92		A69G	12586	7.85794	5405	11.4524	10298	19.2562	6749	29.0858	9554	41.009	10903	52.6369	6513	56.6099	4607	59.0189	4918	63.7251	4640	64.9784	6561	62.1094	6569	64.4086	5819	10.3626
A69T	0.000348618	6.0325e-05	7.90326	0.575628	29.1471	0.680425	21.2438	0.891249	11646.7		A69T	18086	7.70209	7466	9.20171	14623	13.1915	9891	16.8032	14778	20.3343	17855	24.6038	11912	24.2864	7482	28.1208	8517	28.6134	7743	27.8574	10878	29.7022	10529	31.6459	8193	9.06872
T70A	0.000553367	3.39566e-05	6.98357	0.375843	55.3348	0.613689	48.3513	0.719633	6278.25		T70A	10782	6.90966	4667	9.87787	8676	13.8658	5462	19.8645	7847	31.4005	9178	41.7084	6317	45.4013	3695	50.0135	4108	54.5278	3679	55.2596	5645	53.9061	5283	55.6881	5160	8.33333
T70C	0.000377964	6.42786e-05	10.8287	0.824857	41.6266	0.970774	30.7978	1.27389	4830.5		T70C	7755	10.3288	3182	13.0421	6404	18.3791	4184	22.7772	6285	27.7645	6976	35.3211	4798	34.8062	3008	38.3976	3322	40.2769	3133	41.1108	4515	41.7719	4404	44.9818	3530	11.1615
T70G	0.000419764	0.000108182	8.43932	1.97869	63.4682	2.69024	55.0289	3.33955	410.25		T70G	723	9.68188	274	7.66423	536	20.8955	352	25.8523	576	38.8889	640	53.125	401	51.3716	226	56.1947	273	71.7949	250	64.4	341	56.8915	331	61.9335	316	13.2911
A71C	0.000406582	6.28534e-05	6.92199	0.927837	48.6074	1.29712	41.6854	1.59481	1332.33		A71C	1906	6.9255	978	9.5092	1860	15.2151	1272	20.8333	1876	28.9446	2048	42.2363	1102	39.5644	866	47.4596	865	50.6358	859	46.2165	1224	47.549	1132	47.2615	1132	8.5689
A71G	0.000439899	4.0472e-05	6.68429	0.71263	64.7741	1.03915	58.0898	1.26003	5023.17		A71G	8336	7.28167	3792	9.8365	7181	15.3321	4708	24.9363	6591	39.7815	7438	51.8688	4148	57.0878	3030	59.538	3335	65.3673	2965	65.0927	4462	60.7799	4292	63.6999	4136	9.69536
A71T	0.000593495	5.05823e-05	5.79442	0.559604	61.5667	1.01887	55.7723	1.16244	3449.75		A71T	6219	5.62791	2527	9.37871	4936	13.6953	3181	19.2707	4525	31.3812	5031	45.8954	2948	51.0516	1907	57.1578	2241	60.9103	1980	62.4747	2950	58.4746	2952	59.8577	2798	7.5411
A72C	0.000441765	3.45913e-05	7.8705	0.461186	51.196	0.672201	43.3255	0.815198	2866.75		A72C	4914	7.69231	2044	11.2524	3880	15.3608	2532	22.3144	3603	31.2517	4184	41.2285	2791	42.852	1639	49.5424	1986	50.1511	1744	49.4266	2544	49.8428	2540	52.6378	2203	9.57785
A72G	0.000411421	2.26786e-05	7.0255	0.417352	63.9065	0.599686	56.881	0.730621	6574.67		A72G	11162	7.23885	4791	10.7493	9509	16.5212	6021	27.4705	8410	38.8585	9548	51.6653	5714	56.4053	3859	58.4089	4324	62.5809	3898	64.4177	5942	62.2181	5718	63.4488	5436	9.21634
A72T	0.000491328	3.76862e-05	8.07398	0.524711	59.0096	0.774418	50.9356	0.935439	10287.3		A72T	17764	8.38775	7558	10.0159	14272	15.9823	9227	24.1899	13111	34.0706	15177	46.8011	9654	48.9434	6250	54.928	6637	58.0835	6139	59.4559	8827	58.3664	8832	57.688	7988	8.72559
A73C	0.000649797	6.02742e-05	6.60012	0.610224	58.8003	1.02991	52.2001	1.19711	1770.58		A73C	2978	6.85024	1268	9.38486	2387	12.0654	1664	19.9519	2263	28.502	2704	44.1938	1583	49.0208	1056	53.0303	1225	54.8571	1066	57.5047	1531	56.5643	1522	59.5269	1391	8.62689
A73G	0.000402343	2.32011e-05	7.3819	0.422566	60.9752	0.592888	53.5933	0.728064	5247.75		A73G	8650	7.6185	3906	10.7783	7605	16.6601	4824	26.4925	6803	38.4389	7625	49.0623	4489	53.3304	3170	57.2871	3525	60.1702	3363	61.9982	4532	58.098	4481	60.8793	4395	10.2844
A73T	0.000609069	7.13879e-05	7.8505	0.353329	27.9223	0.483222	20.0718	0.598619	10117.2		A73T	15735	7.86781	6611	8.72788	12905	10.3293	8407	13.4174	13115	17.5067	15608	22.0079	10173	22.599	6398	25.8206	7123	25.9862	6816	27.054	9408	28.1888	9108	29.3149	7153	7.82888
A74C	0.000778809	6.17983e-05	7.2042	0.497562	58.5346	0.897005	51.3304	1.02576	2584.67		A74C	4591	7.10085	1917	9.28534	3634	13.2636	2345	17.6546	3373	26.8011	3758	40.9526	2318	46.4625	1492	52.9491	1608	57.7736	1547	57.7246	2141	56.7025	2292	56.719	2147	7.91803
A74G	0.000442469	2.23734e-05	7.17399	0.350422	59.4627	0.516859	52.2887	0.624451	5264.67		A74G	8877	7.38988	3897	10.0077	7353	15.6943	4707	25.0478	6752	35.8264	7717	46.715	4725	51.9365	3149	54.684	3440	60	3351	57.9827	4811	57.7635	4397	59.4951	4279	9.67516
A74T	0.000790633	4.86901e-05	7.62399	0.341061	50.9418	0.591444	43.3178	0.682736	11309.7		A74T	18924	7.55654	7860	8.94402	15307	12.3538	10221	17.6108	15039	24.7423	16786	35.3628	10833	39.6012	6824	44.5487	7400	49.027	6984	48.7686	9821	50.6466	9717	51.6209	8828	8.4164
C75A	0.000615657	8.1513e-05	9.23941	0.457408	31.4954	0.601604	22.2559	0.755744	1660.75		C75A	2578	9.77502	1093	9.78957	2089	11.8238	1376	13.6628	2197	20.2094	2604	25.2688	1723	26.5235	1014	31.1637	1223	30.0082	1035	31.0145	1573	30.8328	1424	30.8287	1074	8.75233
C75G	0.000498216	0.000134993	9.01479	1.12379	37.102	1.51662	28.0873	1.88761	1152.83		C75G	1818	8.69087	773	10.3493	1493	13.5968	983	19.8372	1523	24.7538	1805	28.5319	1118	26.6547	772	36.658	847	34.5927	670	36.7164	1047	41.1652	985	38.2741	801	10.7366
C75T	0.00045904	6.22963e-05	8.0442	0.538768	34.9393	0.726866	26.8951	0.904769	5584.17		C75T	8930	7.87234	3738	9.81808	7424	12.6751	4924	17.831	7098	21.4004	8407	29.2732	5518	28.8692	3393	32.4492	3945	33.6122	3515	33.4851	5145	35.3936	4973	36.4971	3938	9.1417
A76C	0.000505802	7.53725e-05	12.2777	0.517502	33.0724	0.583773	20.7947	0.780128	1451.67		A76C	2247	12.1495	879	13.6519	1881	15.4705	1258	19.0779	1765	22.6629	2324	27.6248	1424	28.0197	954	32.1803	1048	34.8282	935	33.369	1417	31.9689	1288	32.2981	996	12.0482
A76G	0.00044548	3.11648e-05	7.77969	0.456962	54.9008	0.643057	47.1211	0.788883	6085.5		A76G	9870	8.00405	4290	9.90676	8405	15.8834	5681	23.341	7662	33.5944	8925	43.8319	5446	47.1172	3746	50.2403	4207	51.9372	3812	56.3221	5594	53.4501	5388	55.8649	4624	9.45069
A76T	0.000484745	3.58403e-05	9.2802	0.367594	43.3736	0.497065	34.0934	0.618222	12474.2		A76T	20537	9.16395	8302	10.8649	16622	15.1847	11148	20.3803	15515	27.3606	18621	34.0154	11978	36.3249	7660	39.9217	8849	41.8239	8034	43.9632	11440	43.1119	10985	44.4515	8855	9.55392
T77A	0.000455907	6.1238e-05	11.6388	0.440702	31.0551	0.480567	19.4163	0.652045	9115.42		T77A	13907	11.4762	5710	12.6445	11478	15.2727	7809	18.4531	11579	21.824	13838	26.3694	8901	26.5251	6043	30.5477	6720	29.4345	6281	30.6798	8670	30.7958	8449	32.4535	6467	11.7365
T77C	0.000441199	3.85873e-05	8.09674	0.309199	30.8914	0.386279	22.7947	0.494788	7964.67		T77C	12163	8.19699	5029	9.08729	10272	11.9548	6890	16.0522	10191	20.9989	12577	25.1729	7876	26.1935	5029	29.2106	5800	29.5862	5092	30.0668	7472	31.3169	7185	31.9276	5708	8.61948
T77G	0.000583001	0.00018	13.8382	1.04651	33.6619	1.17514	19.8237	1.57358	531.083		T77G	797	12.6725	337	17.5074	642	16.9782	457	19.9125	724	24.5856	796	25.1256	524	29.9618	369	32.7913	339	31.5634	329	35.8663	545	36.3303	514	30.9339	365	10.9589
A78C	0.000472692	0.000102779	8.28378	0.651337	27.1571	0.799924	18.8733	1.03156	1666.67		A78C	2466	7.78589	998	10.1202	2170	11.5668	1497	15.7649	2142	18.4874	2609	21.5791	1752	21.5183	982	24.3381	1274	28.5714	1041	27.9539	1583	27.9217	1486	27.6581	1141	8.58896
A78G	0.00043199	3.81915e-05	8.32356	0.521962	49.8826	0.722602	41.5591	0.891402	4865.17		A78G	7908	8.21952	3429	11.0528	6572	15.8551	4330	22.5635	6350	30.8189	7396	40.576	4389	42.3787	2994	44.7896	3350	50.3881	3019	48.791	4415	48.5164	4230	51.5603	3751	10.104
A78T	0.000443184	5.48431e-05	12.5676	0.487345	36.2941	0.541823	23.7265	0.72875	11945.4		A78T	18770	12.5519	7730	13.2083	15362	17.0681	10374	21.284	15159	25.6613	18035	30.0693	11717	30.6819	7633	34.7701	8592	36.7086	7865	36.8086	11248	35.7664	10860	36.8324	8353	12.5584
G79A	0.000940944	0.000144071	9.09116	0.507454	31.9727	0.7759	22.8815	0.927109	6341.25		G79A	9816	8.76121	3970	9.74811	7942	11.3825	5468	14.0819	8179	17.6672	10007	23.1738	6574	23.2735	4017	27.7072	4452	30.5705	3982	31.341	5889	32.2466	5799	32.9195	4352	9.76562
G79C	0.0020034	0.000607397	8.89848	0.665032	25.4055	1.2166	16.507	1.3865	850.167		G79C	1271	9.44138	518	7.52896	1096	9.85401	694	9.07781	1127	14.0195	1360	16.3235	926	17.0626	505	18.4158	649	23.7288	543	22.8361	728	25.2747	785	26.7516	625	7.52
G79T	0.00161691	0.000252352	9.17507	0.500289	33.7501	0.932383	24.575	1.05812	9610.42		G79T	14994	8.80352	6227	8.86462	12419	10.7577	8327	13.2941	12703	15.8467	15104	20.8157	9891	22.5356	5917	25.9084	6810	31.6593	6022	31.9993	8622	33.5769	8289	34.6121	6612	8.83243
A80C	0.000592858	8.39604e-05	8.3089	0.748556	47.0978	1.14572	38.7889	1.36858	1421.67		A80C	2384	8.17953	937	8.75133	1944	15.2263	1264	18.9873	1875	26.5067	2058	34.9854	1337	37.9955	864	45.1389	944	40.9958	907	46.1963	1272	49.2138	1274	48.0377	1053	8.16714
A80G	0.000645076	3.45918e-05	8.08569	0.313899	50.6404	0.480315	42.5547	0.57379	5750.33		A80G	8884	8.07069	4035	10.1611	7866	13.107	5381	19.5689	7686	27.0622	8663	36.8002	5016	41.9258	3502	45.9166	3951	50.7213	3747	48.8124	5269	49.2124	5004	50.7194	4420	8.8914
A80T	0.000712384	2.99455e-05	8.10322	0.295894	63.0372	0.481103	54.934	0.564813	11645.4		A80T	20324	8.07912	8424	10.2089	15917	14.5191	10534	21.1601	15115	31.5184	17177	44.0764	10791	50.6626	6735	56.0802	7632	61.3863	7076	62.2527	10139	61.1895	9881	63.1009	8972	10.1872
G81A	0.00115925	9.07573e-05	7.64636	0.403141	50.4074	0.798388	42.7611	0.894397	4135.58		G81A	7058	7.55171	2878	8.82557	5643	10.863	3823	13.8635	5550	22.8468	6273	29.5234	3980	35.603	2363	44.1811	2637	48.3883	2430	50	3502	49.6573	3490	48.5673	3108	7.27156
G81C	0.00107013	0.000118592	6.78632	0.588158	53.4341	1.19038	46.6478	1.32776	405.417		G81C	730	6.71233	285	7.7193	547	10.7861	385	15.0649	472	22.0339	596	33.7248	381	37.2703	239	48.5356	286	46.1538	245	51.0204	367	52.5886	332	55.7229	305	7.21311
G81T	0.00177346	0.000498199	8.70144	0.586268	24.0577	1.04331	15.3563	1.19675	6184.25		G81T	9388	7.95697	4024	8.37475	7707	10.2115	5301	11.3186	8199	12.8308	9810	16.0143	6536	16.3097	3877	18.6742	4293	20.7081	3905	22.0487	5664	26.1299	5507	24.5506	4482	7.40741
A82C	0.000262708	0.000138743	9.0473	0.917125	18.3337	0.784618	9.28637	1.20696	1377.42		A82C	2012	9.19483	830	9.15663	1690	11.3609	1165	14.7639	1747	15.3978	2092	16.8738	1467	14.6558	900	16.3333	967	18.6143	980	18.8776	1328	21.6114	1351	18.3568	933	9.6463
A82G	0.000520466	0.000197584	7.16827	0.566363	15.7282	0.609299	8.55994	0.831873	8552.67		A82G	11817	7.0407	5507	7.37244	10580	8.62949	7468	10.632	11416	10.9671	12960	14.1667	8349	12.7321	5739	14.1662	6256	14.61	6020	14.5847	8134	17.6912	8386	16.5395	5934	6.52174
A82T	0.000495439	0.000191853	7.86056	0.526574	15.6254	0.552454	7.76482	0.763207	11491		A82T	17016	7.64575	7329	8.10479	13926	9.40686	9481	11.1486	15050	11.5282	17347	14.1004	11967	12.476	7506	14.6683	8294	15.1676	7857	15.2348	10900	17.3853	11219	15.8035	8300	7.54217
A83C	0.000365126	0.00014373	6.96536	0.658201	16.5946	0.678927	9.62929	0.945606	2478.33		A83C	3548	6.67982	1669	7.54943	3003	9.72361	2198	10.6915	3275	12.855	3729	14.6688	2597	12.8225	1564	14.578	1725	17.5072	1786	16.4614	2239	18.0884	2407	17.823	1682	7.19382
A83G	0.000526551	0.000133849	7.01768	0.382547	15.629	0.409699	8.61129	0.560531	9129.08		A83G	12623	7.20114	5881	6.75055	11109	8.49761	7741	9.75326	12216	11.1329	13881	13.7814	9003	13.0401	6164	15.2661	6455	15.5693	6532	14.2529	8906	16.4945	9038	15.7114	6897	6.48108
A83T	0.00188688	0.00079852	9.00667	0.730782	21.5546	1.25299	12.5479	1.45052	11265.3		A83T	16686	8.48016	7279	8.40775	13933	9.5098	9593	11.5605	14946	12.8329	17318	15.3597	11748	14.4876	7546	16.1808	8032	18.2644	7656	19.3835	10044	24.4425	10403	22.3205	7944	8.6858
A84C	0.00054443	4.05964e-05	6.86057	0.498851	59.5847	0.80495	52.7242	0.946994	1195.08		A84C	2132	7.03565	876	10.6164	1619	13.4651	1089	20.2938	1506	33.5989	1701	45.0911	1110	53.1532	684	54.8246	806	57.196	714	57.7031	1036	58.3012	1068	58.2397	986	8.51927
A84G	0.00156952	0.000469922	7.06741	0.569121	20.9974	0.983421	13.9299	1.13623	7269.75		A84G	10240	6.51367	4771	6.93775	9121	7.89387	6251	10.2544	9965	11.2494	11010	14.2234	7190	13.8804	4937	15.7788	5219	18.7009	5044	19.7462	6606	22.2676	6883	22.156	5313	6.26765
A84T	0.000207464	1.23199e-05	7.4401	0.443981	62.481	0.555702	55.0409	0.711283	7727.42		A84T	14353	7.47579	5659	13.9601	10342	24.2216	6724	37.0464	9452	46.8684	10871	54.5304	7017	57.8595	4566	58.41	5176	64.5093	4784	63.3988	6897	61.737	6888	61.9483	6502	9.48939
T85A	0.00440153	0.00186804	8.24388	0.729559	24.8091	1.898	16.5652	2.03339	10078.9		T85A	15283	7.11248	6265	6.87949	12615	8.92588	8910	10.0449	13168	11.5735	15583	14.2527	10892	13.4594	6710	15.6185	7161	18.0561	6460	20.7276	9145	24.5161	8755	26.5905	6967	6.88962
T85C	0.00647712	0.0016762	8.84338	0.647363	37.8438	2.15463	29.0004	2.24978	8515.67		T85C	12787	7.55455	5647	7.31362	10673	9.95971	7621	10.8647	11749	12.5117	13188	15.8326	8999	15.9129	5533	20.7121	5981	27.2028	5316	30.9255	7201	35.0507	7493	37.1413	6326	6.54442
T85G	0.000299875	0.000116654	5.97111	0.550577	13.931	0.521778	7.95991	0.758543	1812.42		T85G	2675	6.35514	1200	5.83333	2227	7.45397	1523	10.4399	2294	10.7672	2682	13.1245	1894	12.2492	1170	14.7009	1365	12.2344	1272	12.6572	1790	15.3631	1657	14.2426	1215	7.3251
T86A	0.000437239	0.000194349	8.72571	0.555269	15.5376	0.531221	6.81184	0.768453	9279.75		T86A	13604	8.55631	5715	9.5888	11569	9.86256	7713	11.3574	12034	12.124	14016	14.8901	9759	12.8702	6203	15.0089	6860	14.4606	6175	14.5263	8823	16.8083	8886	16.4866	6266	7.34121
T86C	0.000841226	0.000342148	6.38681	0.652806	16.8238	0.896177	10.4369	1.10873	8418.08		T86C	12415	5.87193	5284	6.58592	10109	8.07202	7092	9.84208	10882	10.2187	12478	13.5759	8892	11.7634	5593	14.5539	6556	18.2733	5936	15.0101	7793	17.798	7987	17.7288	5888	5.96128
T86G	0.000442938	0.000232344	8.04416	0.74185	15.97	0.745395	7.92585	1.05164	962.75		T86G	1400	7.78571	610	8.85246	1205	10.0415	811	9.74106	1230	12.5203	1462	15.2531	1037	13.2112	643	13.0638	730	15.2055	670	16.2687	871	18.5993	884	15.9502	662	9.06344
C87A	0.0041045	0.00081238	9.28158	0.55793	36.8934	1.48237	27.6118	1.58389	6371		C87A	9841	8.47475	4002	8.27086	8195	9.81086	5555	12.7633	8426	13.6245	10137	16.8294	6751	19.1231	4111	23.5952	4556	29.9166	4031	31.5058	5581	34.6712	5266	37.9795	4297	7.84268
C87G	0.00106942	0.00057097	8.12931	0.684122	15.8697	0.856265	7.74039	1.096	754		C87G	1032	9.01163	459	6.31808	914	8.53392	650	11.0769	1022	10.274	1119	12.7793	819	13.5531	448	13.6161	594	13.9731	533	16.1351	727	18.1568	731	14.7743	536	7.08955
C87T	0.00114162	9.63152e-05	7.77959	0.490712	56.6647	0.945168	48.8852	1.06496	4669.5		C87T	7838	7.55295	3326	8.68912	6347	11.7221	4226	16.4931	6095	24.1345	6884	33.7885	4417	39.4159	2797	46.9074	3519	55.6124	2751	53.7259	3981	56.5185	3853	55.6709	3377	7.87681
T88A	0.000421954	0.000130322	8.11241	0.375671	14.7569	0.360503	6.64452	0.520664	14185.4		T88A	20671	7.95317	8924	8.57239	17222	9.52851	11971	10.6173	18652	11.854	21424	13.3168	15030	12.5549	9451	14.4958	10576	14.2209	9560	14.0586	13211	16.1078	13533	15.0299	9708	7.22085
T88C	0.000672868	0.000551367	7.12247	1.1662	15.5718	1.34409	8.44928	1.7795	9823.83		T88C	14140	6.81754	6183	7.34271	11502	8.86802	8018	9.21676	12683	10.8886	14425	13.0468	10227	11.8119	6524	13.9485	8536	23.4185	6967	12.8319	9321	15.7494	9360	14.4124	6725	6.79554
T88G	0.000839496	0.000365104	7.63702	0.550673	15.2593	0.667952	7.62228	0.865679	1818		T88G	2628	8.10502	1095	6.48402	2218	8.34085	1560	9.61538	2333	11.0587	2775	12.7568	1986	11.8328	1231	14.541	1308	13.7615	1322	14.4478	1641	17.3065	1719	15.2996	1310	8.32061
C89A	0.000444292	0.000169482	6.98768	0.464306	13.8497	0.470534	6.86206	0.661046	5060.83		C89A	7270	6.72627	3367	7.48441	6111	8.50925	4121	9.90051	6595	10.4776	7767	12.2312	5306	11.7791	3308	12.8174	3665	14.161	3519	12.0773	4815	15.1194	4886	14.8792	3540	6.01695
C89G	0.000441219	0.000208508	6.81968	0.583816	13.9446	0.602766	7.12493	0.839147	1103		C89G	1687	6.99467	674	6.08309	1357	8.32719	893	10.4143	1407	10.661	1633	11.7575	1165	11.7597	743	14.6703	786	14.3766	767	12.3859	1025	16.0976	1099	13.3758	788	8.62944
C89T	0.00066557	0.000643249	6.64173	1.66389	17.3161	2.01906	10.6743	2.61632	6104.83		C89T	8868	6.52909	3582	6.756	7211	7.94619	5129	10.5284	7628	11.3529	9092	14.0233	6056	12.6982	3922	13.284	6293	28.8892	4116	13.5811	5545	16.6096	5816	16.2655	4166	6.55305
A90C	0.00829226	0.00538871	7.0934	0.488679	15.2082	1.46898	8.11484	1.54814	2249.33		A90C	3362	6.30577	1385	5.55957	2580	7.36434	1885	8.75332	2923	8.17653	3437	9.36864	2427	9.1471	1485	8.95623	1643	11.5642	1585	12.2397	2151	16.0855	2129	13.9502	1490	5.83893
A90G	0.000357609	0.000109066	7.29277	0.416808	14.5558	0.378777	7.26307	0.563206	11687.8		A90G	15357	7.32565	7611	7.21324	14211	9.16895	10078	10.5279	15813	11.383	18417	12.9934	10814	13.1496	8212	13.6995	8532	14.4632	8474	13.4411	11040	16.3496	11694	14.4348	8301	6.92688
A90T	0.006181	0.00359421	8.0396	0.501757	16.451	1.29413	8.41139	1.388	12726.2		A90T	18709	7.00732	7878	7.04494	15345	8.21766	10630	9.31326	16859	9.58538	19545	11.1742	13303	9.97519	8675	11.0317	9236	13.0468	8614	13.2923	11922	16.4905	11998	16.6278	8734	6.50332
G91A	0.0224711	0.0130848	9.04072	0.251879	15.7798	1.35465	6.73907	1.37787	7159.08		G91A	9955	8.25716	4397	8.32386	8502	9.18607	5848	9.86662	9371	9.34799	11472	10.3731	7824	9.34305	4827	10.2341	5267	11.5436	4832	12.2517	6663	13.8076	6951	14.5734	4828	7.76719
G91C	1.46702e-05	3.46487e-05	9.77207	0.794202	11.9702	0.370876	2.19814	0.87653	2001.83		G91C	2833	9.77762	1185	10.9705	2393	12.0769	1741	12.062	2564	11.2324	3229	12.0471	2180	10.3211	1324	11.7825	1470	12.585	1349	11.8606	1825	14.5205	1929	12.027	1332	9.60961
G91T	0.00530584	0.00190423	9.02636	0.457369	20.7208	1.09924	11.6945	1.19059	11127.3		G91T	15628	8.74712	6793	8.5382	13467	9.39333	9573	9.94464	14474	10.4187	17951	11.7041	11860	11.9309	7511	13.9795	8798	20.6865	7215	17.5191	10189	19.5309	10069	19.8629	7543	7.62296
G92A	0.00637279	0.00091498	8.7937	0.315287	32.9371	0.982082	24.1434	1.03145	10178.4		G92A	14817	8.46325	6367	8.16711	12853	8.98623	8877	10.2174	13444	11.0607	16870	13.9063	10775	14.7564	6658	19.7807	7383	25.3014	6240	27.9167	9094	30.1517	8763	31.7129	7355	7.70904
G92C	0.000590337	0.00054159	8.27882	0.592418	11.6943	0.561884	3.41551	0.8165	1975.08		G92C	2737	8.18414	1160	8.27586	2369	8.56902	1679	10.006	2605	10.2111	3084	10.8949	2155	9.51276	1339	10.0075	1503	13.1737	1309	11.3063	1852	13.2829	1909	11.4196	1340	8.80597
G92T	0.000966301	0.00190404	10.2711	3.01148	19.025	3.37744	8.75391	4.52506	4261.58		G92T	5744	10.2716	2416	10.6374	4914	11.1111	3626	11.583	5458	13.4665	6620	16.2387	4167	13.103	2621	14.422	5301	36.861	2677	15.353	3810	16.5354	3785	14.6896	2717	8.02356
C93A	0.00303414	0.000535197	8.31398	0.776102	53.0458	2.0841	44.7318	2.22392	3299.75		C93A	5112	7.04225	2411	8.54417	4695	10.6709	3164	12.1049	4494	16.2439	5239	23.745	3032	25.2639	1977	34.6485	2227	45.6219	1889	48.9677	2752	49.1642	2605	54.0115	2279	7.41553
C93G	0.00262897	0.000429699	6.72826	0.649909	45.5487	1.73297	38.8204	1.85083	1066.17		C93G	1557	7.32177	716	4.46927	1453	8.67171	1004	10.9562	1489	14.9765	1735	19.1931	1102	24.8639	664	31.6265	731	39.3981	612	43.4641	870	44.2529	861	44.1347	813	7.74908
C93T	0.000752356	4.54688e-05	7.11316	0.409262	61.6007	0.699674	54.4876	0.81058	5670.83		C93T	9309	6.86432	4091	9.67978	7916	13.5169	5308	19.1409	7285	29.5402	8379	41.3892	4999	50.15	3306	54.1137	4621	61.0474	3328	61.0577	4863	58.8114	4645	60.8396	4362	8.04677
A94C	0.00053705	3.98369e-05	6.31304	0.554146	62.923	0.849929	56.61	1.01462	1797.67		A94C	2636	6.75266	1417	8.53917	2639	13.9826	1632	23.8358	2536	33.4779	2756	47.8592	1375	53.6	1060	58.1132	1245	61.6064	1054	63.7571	1643	59.7687	1579	62.2546	1552	8.82732
A94G	0.000706238	6.02653e-05	6.48667	0.65849	65.3213	1.04118	58.8346	1.23194	7654.83		A94G	10579	6.86265	6632	8.59469	10485	13.2284	7494	19.4022	11193	30.662	11349	46.5944	5338	54.0465	4593	59.1988	4877	65.7371	5009	63.7852	7021	62.954	7288	62.8293	7217	6.91423
A94T	0.000600209	3.57654e-05	6.7447	0.449468	64.3778	0.702376	57.6331	0.833878	11127.8		A94T	16876	7.00995	8766	8.92083	16311	14.4933	11080	21.4531	15050	33.6146	16709	47.3577	8133	53.3383	6655	59.2938	7504	63.6194	6839	64.2345	9789	62.2229	9821	62.7329	9584	7.83598
A95C	0.000362962	3.04852e-05	6.28626	0.710693	66.8262	0.934871	60.54	1.17434	1779.92		A95C	2510	6.45418	1430	9.79021	2321	19.9483	1821	27.6222	2493	41.5965	2607	56.1181	1296	58.7963	1174	61.2436	1235	65.749	1165	64.8927	1667	65.7469	1640	67.622	1501	9.86009
A95G	0.000505972	3.73469e-05	7.40747	0.610902	65.056	0.820509	57.6486	1.02295	7447.08		A95G	9873	7.76866	6242	9.83659	10179	16.7305	7308	23.6727	10431	36.1998	11503	50.7868	5410	56.5619	4788	60.4219	4857	63.9901	4944	64.8058	7023	62.5516	6807	63.9342	6497	8.80406
A95T	0.000703543	5.21426e-05	6.6124	0.558066	63.472	0.879656	56.8596	1.04174	11248.9		A95T	15197	6.98164	9025	8.12188	15894	13.4265	11558	20.0554	15805	29.9905	17375	44.6216	7863	52.9442	7107	56.8454	7453	62.2836	7055	63.3026	10311	59.9166	10344	62.9447	9342	8.47784
A96C	0.000431761	2.72234e-05	6.38034	0.485387	62.0438	0.678215	55.6635	0.834012	2076.17		A96C	2883	6.93722	1693	8.62374	2964	15.9582	2008	25.8964	2833	36.7455	3220	49.1925	1482	54.4534	1318	56.7527	1422	61.6737	1360	61.8382	1939	60.9077	1792	60.8259	1666	9.96399
A96G	0.000529256	3.37038e-05	6.72709	0.429077	55.1124	0.622181	48.3853	0.755789	5125.33		A96G	6856	6.82614	4012	9.14756	6789	13.5955	4969	21.453	7124	31.1482	7975	41.3793	3776	46.4513	3296	49.0898	3462	55.1993	3374	54.7718	4967	52.728	4904	56.1175	4123	9.21659
A96T	0.000849645	7.89991e-05	8.404	0.447224	41.4807	0.667999	33.0767	0.803885	8045.67		A96T	9982	8.31497	5878	8.71045	10328	12.074	7707	16.1541	11253	21.4787	13127	28.1176	6222	32.0154	5312	36.2575	5899	39.3117	5525	39.7104	7632	40.4219	7683	43.6548	6253	7.86822
A97C	0.000273458	1.82725e-05	6.52591	0.572098	65.4289	0.688526	58.903	0.89519	1561.92		A97C	2183	6.82547	1318	11.305	2086	21.2848	1494	32.7979	2214	45.7543	2242	56.4228	1129	58.4588	1014	62.426	1136	65.493	1121	67.083	1397	62.9921	1409	64.3009	1407	10.8031
A97G	0.000353972	1.74784e-05	7.43017	0.379738	59.4708	0.474982	52.0406	0.608119	14284.2		A97G	19569	7.6243	11556	10.8255	19565	18.1651	13781	27.6468	19439	38.7931	21902	48.6942	10293	53.1138	9332	55.7437	10023	58.5354	9492	59.6924	13365	57.1717	13093	60.4063	12132	8.76195
A97T	0.000282593	2.25335e-05	6.95639	0.688133	64.7712	0.79912	57.8149	1.05457	7953.92		A97T	10910	7.36939	6489	11.7121	10851	20.1087	7456	33.1143	10520	44.4297	12154	56.7632	5794	58.5778	5159	60.3024	5628	64.7122	5395	64.8934	7567	61.9532	7524	64.9522	6682	10.7603
G98A	0.000594082	5.48668e-05	7.17608	0.740423	64.7166	1.05096	57.5405	1.28559	3813		G98A	5192	7.93529	2994	8.58383	5239	14.3157	3780	23.5714	5373	34.6548	5944	46.753	2751	55.2163	2344	57.6792	2475	61.899	2590	67.1815	3537	60.4467	3537	65.3379	3203	8.33594
G98C	0.000788247	7.62883e-05	5.55872	0.700914	62.1405	1.21525	56.5818	1.4029	509.667		G98C	691	6.65702	382	5.75916	669	11.5097	538	17.8439	790	27.8481	833	42.7371	383	48.3029	267	55.8052	339	55.7522	318	59.1195	462	62.7706	444	62.1622	456	6.79825
G98T	0.000818961	4.81094e-05	5.98256	0.417686	62.2644	0.726915	56.2818	0.838372	3098.25		G98T	4175	6.01198	2343	7.51174	4269	12.1106	3084	18.2879	4518	27.2687	5033	40.7709	2274	49.6922	1860	54.9462	2269	61.3486	1887	61.1023	2732	59.4436	2735	61.3528	2389	8.49728
A99C	0.0007652	0.000146722	8.47539	0.807009	35.5778	1.08086	27.1024	1.3489	637.25		A99C	727	8.8033	444	8.33333	771	11.284	594	15.6566	919	20.5658	996	24.8996	537	26.8156	487	34.7023	495	32.5253	505	34.0594	567	33.5097	605	39.1736	456	7.01754
A99G	0.000525489	4.84586e-05	7.33735	0.448009	39.4047	0.599938	32.0673	0.748758	4612.75		A99G	5707	7.37691	3517	8.55843	5867	12.5959	4390	16.8109	6480	23.0864	7272	31.1194	3577	33.0724	3228	35.254	3403	37.7608	3292	39.2467	4266	38.1388	4354	41.0657	3468	8.24683
A99T	0.000486541	3.36794e-05	8.37804	0.471614	53.6104	0.617687	45.2324	0.777147	7114.83		A99T	9387	8.55438	5590	10.5009	9477	15.7539	6885	22.4691	10043	31.1859	11319	42.4596	5201	47.1063	4693	49.968	4804	51.9151	4685	53.0416	6837	51.1189	6457	54.5145	5709	9.03836
A100C	0.00975463	0.00125191	6.91191	0.264821	36.5542	1.15762	29.6423	1.18752	1344.08		A100C	1583	6.82249	1039	6.73725	1738	7.65247	1336	7.48503	1961	8.00612	2320	10.7328	1072	14.0858	929	16.6846	904	23.7832	931	28.1418	1154	33.4489	1162	32.7022	1018	6.778
A100G	0.000625071	5.1379e-05	5.00497	0.538759	58.4028	0.953654	53.3978	1.09532	6660.17		A100G	9347	5.27442	5633	6.78147	9439	11.9716	6718	18.8449	9448	28.8738	10264	42.4786	4506	48.8682	4086	50.8076	4335	56.4937	4221	59.0855	6015	54.7298	5910	59.5262	5863	7.02712
A100T	0.00578596	0.000476795	6.31041	0.276273	48.6873	0.997867	42.3769	1.03541	9452.58		A100T	11567	6.31106	7013	6.04591	12362	7.09432	9418	7.921	14479	9.84875	16524	14.8451	7522	18.6785	6434	26.3133	6398	36.0269	5822	42.3394	8111	44.3225	7781	45.6625	7281	5.61736
T101A	0.00090477	5.67109e-05	7.42132	0.438113	60.0438	0.710334	52.6225	0.834576	7846.42		T101A	10083	7.24983	5964	8.51777	10602	12.8466	7530	18.7915	11327	26.7238	12569	38.404	5745	45.1175	5016	51.6746	5348	57.5916	5097	60.722	7440	58.7231	7436	58.9833	6057	7.37989
T101C	0.000420655	3.47285e-05	7.32333	0.538907	51.1159	0.695044	43.7926	0.879492	7381		T101C	9413	7.2453	5486	10.2443	9774	15.1524	7037	22.8364	10065	32.1311	11715	40.7341	5657	42.4253	4926	47.097	5504	48.7645	4976	50.9646	7096	50.0846	6923	53.7484	5745	9.88686
T101G	0.000883915	0.000106834	7.12469	0.760734	53.967	1.2607	46.8423	1.47244	961.5		T101G	1221	6.87961	750	8.4	1259	13.1056	969	15.3767	1464	23.8388	1445	36.4014	738	41.3279	652	48.4663	630	51.746	636	55.8176	927	49.4067	847	54.1913	727	6.87758
T102A	0.00131688	0.000138757	9.16703	0.60541	51.88	1.00363	42.713	1.17209	5440.25		T102A	6647	9.61336	3901	8.10049	7181	12.7837	5373	15.5407	7746	22.2954	8840	30.5317	3914	35.3602	3604	42.758	3720	48.2527	3648	49.2325	5261	50.1806	5448	53.2305	4090	9.14425
T102C	0.0011363	0.00012282	8.4017	0.623691	51.3295	1.0307	42.9278	1.20471	4821.67		T102C	6069	7.95848	3499	9.37411	6152	11.9798	4754	16.1548	6809	22.4556	7759	32.0144	3481	34.9899	3239	42.2044	3719	48.2119	3158	49.9683	4595	49.1621	4626	53.5019	3673	8.49442
T102G	0.000569254	8.29213e-05	8.62552	1.07075	58.8962	1.38989	50.2706	1.75451	345.167		T102G	445	8.31461	252	10.3175	462	16.8831	282	24.8227	445	30.7865	563	44.5826	274	49.635	223	52.0179	237	54.0084	262	56.1069	324	56.7901	373	63.5389	232	5.17241
A103C	0.000841309	0.000157165	11.281	1.41183	61.4503	1.89668	50.1693	2.36446	372.25		A103C	493	10.7505	286	14.3357	476	15.1261	339	24.7788	563	30.1954	594	43.4343	256	43.3594	234	55.9829	287	55.0523	220	59.5455	355	57.7465	364	66.7582	320	13.4375
A103G	0.000452556	4.68753e-05	8.9911	0.753436	55.4578	0.913139	46.4667	1.18385	3379.92		A103G	4337	9.13074	2527	11.6343	4482	16.9121	3224	24.0385	4737	32.6156	5277	46.3521	2549	47.3911	2375	50.6526	2345	54.6695	2210	55.4751	3259	53.7588	3237	55.3599	2713	10.1732
A103T	0.000934403	9.60385e-05	9.32071	0.634761	51.9447	0.935759	42.624	1.13074	5296.25		A103T	6301	8.824	3925	10.0892	6602	13.9049	5178	18.6752	7585	25.1681	8674	33.8368	3774	39.2422	3937	43.5865	3814	48.8988	3538	50.1979	5295	50.2927	4932	54.927	3910	9.13043
T104A	0.00156118	0.000120463	10.7483	0.450406	53.219	0.722342	42.4707	0.85126	7820.83		T104A	9025	10.2715	5457	11.4532	10058	13.1338	7415	17.1679	11268	21.7785	12854	30.3952	5700	35.2632	5473	42.9381	5445	49.4215	5268	51.8223	8023	51.4022	7864	53.1282	5961	9.42795
T104C	0.00152143	0.000174825	10.1507	0.621455	50.4257	1.04243	40.275	1.21362	4999.42		T104C	5950	9.05882	3483	10.623	6568	13.4896	4815	16.4071	7017	21.1344	8174	28.921	3685	33.2157	3575	40.4196	3767	45.2084	3354	49.2248	4753	48.5798	4852	51.9167	3735	9.15663
T104G	0.000781787	0.000218513	9.28351	1.96013	55.2482	2.55403	45.9647	3.2195	354.25		T104G	375	12.5333	279	7.16846	474	16.0338	364	19.2308	465	24.7312	572	42.3077	251	43.4263	242	46.6942	242	58.2645	275	50.9091	361	50.6925	351	57.8348	288	10.0694
A105C	0.00185464	0.000687752	8.2221	1.31743	36.149	2.5259	27.9269	2.84882	468		A105C	569	7.90861	324	8.33333	598	10.5351	440	9.54545	694	14.6974	821	22.8989	372	23.9247	334	22.1557	323	31.2693	293	30.0341	424	37.0283	424	41.5094	364	8.24176
A105G	0.000542671	4.86154e-05	8.40135	0.668551	58.4978	0.880535	50.0965	1.10558	3555.75		A105G	4579	9.06311	2838	9.93658	4897	15.3359	3391	23.3559	4964	32.3529	5718	45.2781	2535	50.572	2304	52.2135	2480	56.2097	2276	60.4569	3345	56.3827	3342	57.8396	2959	10.3075
A105T	0.00222235	0.000217825	7.1457	0.480999	52.0739	1.11243	44.9282	1.21196	5905.92		A105T	7428	6.89284	4501	6.82071	8063	9.73583	6006	11.8548	8868	15.9788	9720	23.6111	4436	29.8693	3932	39.115	3872	48.0888	3755	50.5992	5113	47.8975	5177	51.2073	4816	6.64452
C106A	0.00175457	0.000184616	11.0754	0.555807	50.6392	0.927151	39.5638	1.08099	3403.5		C106A	4041	10.2202	2400	11.9583	4401	13.656	3355	15.7377	4736	21.0726	5408	27.7922	2583	32.9075	2307	42.306	2408	45.3488	2222	48.1098	3540	47.2881	3441	52.4847	2494	10.425
C106G	0.00139516	0.000367852	13.6641	1.33596	45.7921	1.7865	32.128	2.23078	1491.08		C106G	1488	13.2392	990	12.1212	1752	16.4954	1374	19.7962	2216	23.7365	2557	28.7837	1112	33.2734	1037	37.8014	1247	40.5774	1051	44.2436	1615	41.3003	1454	52.2008	961	12.2789
C106T	0.000591878	5.11549e-05	8.8914	0.674492	60.7619	0.86567	51.8705	1.09742	6531.92		C106T	8201	9.03548	4981	10.6404	8548	16.7408	6259	21.7607	8973	33.7457	10332	45.1897	4827	50.0518	4479	55.4142	4606	60.2475	4267	62.1748	6516	57.52	6394	60.635	4805	10.4891
T107A	0.00178205	0.000205949	9.37508	0.476706	40.5564	0.835441	31.1814	0.961879	10773		T107A	12340	9.19773	7752	9.14603	13418	10.9778	10241	13.5143	15296	17.0371	17442	23.3689	8546	25.6026	7808	31.8263	7668	36.5545	7482	38.6795	10642	39.4193	10641	41.3589	7930	8.62547
T107C	0.00148015	0.000116946	8.10239	0.365983	43.3571	0.661795	35.2547	0.756251	6346.17		T107C	7681	8.28017	4451	8.31274	8321	9.95073	6232	13.527	9386	17.1852	10614	25.1083	4812	29.3849	4236	35.2455	4526	40.6982	4220	41.9431	5737	43.2979	5938	41.7986	4964	7.75584
T107G	0.00142539	0.000139126	9.73993	0.527223	49.1141	0.860074	39.3742	1.00881	2070.17		T107G	2277	8.95916	1526	9.63303	2716	13.218	2058	16.3751	3004	21.0053	3301	27.7492	1554	33.3333	1384	41.1127	1429	46.816	1417	47.9887	2051	47.8791	2125	48.2353	1516	8.77309
T108A	0.000527254	3.4467e-05	9.17515	0.438957	52.5742	0.555607	43.399	0.708084	12554.3		T108A	15904	9.36242	9631	10.9023	16386	15.7696	12171	22.3071	17662	30.4609	19826	40.7041	9417	45.8001	8548	47.8007	8899	50.8596	8316	52.0202	12002	50.4749	11890	53.8856	9966	10.4154
T108C	0.000487827	4.45446e-05	9.55328	0.736499	61.8214	0.902259	52.2682	1.16469	9529.42		T108C	12744	10.35	8065	10.9361	12728	18.204	9280	25.4418	13820	35.9768	14237	49.6874	6731	54.3159	6187	55.5035	6341	60.7317	6690	61.3453	8606	61.3409	8924	60.3877	8880	10.7995
T108G	0.000522499	5.76241e-05	8.34674	0.809951	57.9437	1.05873	49.597	1.33302	2187		T108G	2897	8.49154	1702	11.1633	2910	14.7079	2128	25.5169	3000	32.0333	3357	45.0402	1601	49.3442	1407	50.0355	1514	59.0489	1425	57.193	2114	56.1968	2189	58.3371	1743	10.4418
T109A	0.000419392	2.94626e-05	8.18687	0.54483	59.2672	0.678111	51.0803	0.86987	13755.5		T109A	18508	8.41258	10444	11.4228	18923	17.27	13602	24.3641	18659	36.958	21655	48.4692	9809	52.88	9125	54.6411	9539	57.9516	8946	58.9649	12982	56.8556	12874	59.492	11419	10.3337
T109C	0.000458942	3.41826e-05	8.43527	0.610059	63.5657	0.777245	55.1305	0.988069	9164.5		T109C	12891	8.68823	7223	11.7403	12650	17.3439	8922	25.297	12457	37.3605	14268	51.4718	6584	55.9386	5862	58.4613	6424	63.1071	5899	62.1631	8567	61.5968	8227	62.8905	7745	9.89025
T109G	0.000370027	5.05458e-05	8.87046	1.13162	61.8614	1.3092	52.9909	1.73048	1226.33		T109G	1677	9.71974	996	11.747	1676	18.3174	1163	28.7188	1659	39.1802	1941	52.9109	910	58.9011	804	55.3483	809	59.8269	788	61.802	1157	57.3034	1136	63.3803	981	9.27625
G110A	0.00120334	8.60834e-05	6.35101	0.384407	49.8875	0.747531	43.5365	0.840578	5040.25		G110A	6617	6.77044	3793	6.90746	6977	9.54565	5136	12.5	7405	19.5544	8217	29.086	3736	37.5	3190	41.3793	3311	48.4748	3162	49.2726	4606	48.198	4333	47.6575	4254	7.07569
G110C	0.00403917	0.0016314	6.6691	0.473364	17.0331	1.04586	10.364	1.14799	1396.25		G110C	1594	6.02258	961	7.07596	1673	6.93365	1330	6.91729	2099	8.43259	2326	9.93121	1034	10.4449	1074	10.7076	1044	14.5594	997	16.9509	1267	18.3899	1356	15.118	1004	6.0757
G110T	0.00096693	0.000156639	6.84975	0.650959	34.8785	1.06061	28.0287	1.24444	2868.83		G110T	3466	8.02077	1922	6.2435	3758	8.62161	2788	13.2712	4292	16.2861	5121	23.9211	2388	26.5075	1697	28.8745	2026	32.6752	1767	37.0685	2623	34.0069	2578	34.0574	2129	5.30766
A111C	0.0054058	0.00403687	6.98998	0.540812	13.7803	1.26146	6.79033	1.3725	1071.58		A111C	1245	7.5502	742	5.66038	1314	7.91476	986	8.82353	1596	6.14035	1789	8.83175	854	9.60187	798	11.7794	817	10.2815	773	12.4191	992	13.8105	953	13.3263	762	7.21785
A111G	0.00191475	0.00019472	7.05179	0.309835	30.5089	0.572173	23.4571	0.650676	6736.58		A111G	7621	7.4006	4510	6.65188	8301	8.04722	6305	9.77002	9828	12.3016	11071	16.7194	5452	19.8459	4552	24.6924	5029	26.9437	4739	29.6898	6567	31.0644	6864	28.8462	4936	6.64506
A111T	0.00187603	0.000127703	6.40118	0.243704	36.0153	0.504646	29.6141	0.560409	13403.4		A111T	16107	6.67412	9504	6.60774	17419	7.61812	13056	9.61244	19662	12.8217	22512	18.8477	10402	23.5916	9066	27.6638	9401	32.8582	8849	34.6254	12170	35.8012	12693	34.4205	10202	6.27328
T112A	0.00296333	0.000444732	7.41497	0.281364	22.8002	0.564981	15.3852	0.631165	7503.67		T112A	8487	7.32886	5192	7.35747	9400	7.87234	7094	8.71159	10648	9.82344	12598	12.2877	6038	14.5412	5302	16.4655	5608	20.3816	5355	21.4939	7081	23.4571	7241	21.0882	5347	6.97587
T112C	0.00232591	0.000435211	6.79079	0.306429	19.0295	0.545779	12.2387	0.625918	6627.58		T112C	7519	6.62322	4397	6.77735	8124	7.32398	6120	8.28431	9879	9.02925	10873	11.3584	5346	12.4205	4919	15.5723	5034	18.1367	4740	17.4262	6184	19.9547	6396	17.5735	4740	6.26582
T112G	0.00251351	0.0011142	7.31145	0.862041	22.1602	1.59815	14.8488	1.81582	475.583		T112G	521	6.33397	335	8.0597	618	10.1942	426	7.74648	706	9.2068	796	12.0603	385	14.8052	341	18.1818	348	21.8391	358	24.581	420	22.619	453	17.8808	319	6.89655
A113C	0.00292026	0.00133222	8.10421	0.814168	22.7314	1.62312	14.6272	1.81587	720.333		A113C	833	6.84274	516	7.36434	895	9.27374	730	10.8219	983	10.9868	1168	12.7568	605	16.5289	480	13.125	558	20.2509	483	21.3251	639	25.1956	754	21.4854	538	5.76208
A113G	0.00101899	0.000123855	10.0399	0.872674	58.545	1.21065	48.5051	1.49239	3805		A113G	4196	10.2002	2904	9.60744	4622	15.1017	3327	20.8897	5393	25.6444	6144	38.2324	3277	42.2643	2351	50.0638	2730	56.2271	2708	59.675	3963	57.3555	4045	57.0334	3067	9.45549
A113T	0.00161317	0.00018314	7.086	0.455721	39.2498	0.892729	32.1638	1.00232	7232.5		A113T	8943	7.16762	5420	6.93727	9463	9.20427	7113	11.3595	10641	14.6321	11801	22.3117	5592	25.7511	4621	30.383	5042	37.029	4694	38.709	6604	39.3701	6856	37.1791	5495	6.42402
G114A	0.00139291	0.000111536	7.26737	0.385222	44.7212	0.72436	37.4538	0.820422	5426.25		G114A	6755	7.41673	3983	8.15968	7089	9.67696	5525	11.8914	7916	17.3194	9098	25.665	4235	32.0661	3586	36.8098	3716	42.8149	3461	45.1893	4859	42.6425	4892	42.7433	4237	7.00968
G114C	0.00142199	0.000608454	9.54752	1.03906	25.1238	1.48262	15.5763	1.81047	882.917		G114C	953	10.1784	553	10.1266	1018	8.15324	838	13.1265	1364	17.1554	1489	15.8496	730	18.2192	672	19.6429	653	23.5835	609	25.4516	818	24.9389	898	26.1693	634	8.51735
G114T	0.00151625	0.000185653	7.10538	0.392655	30.8781	0.707272	23.7727	0.808957	8583.42		G114T	10226	7.39292	5809	6.59322	10798	8.5664	8384	10.2576	13117	13.654	14728	18.5361	6709	21.1507	5717	23.6838	6067	28.2677	5722	30.7585	7812	31.106	7912	30.3463	6556	6.4216
A115C	0.000382806	4.08312e-05	12.5108	1.11113	69.7064	0.988496	57.1956	1.48719	761.417		A115C	923	13.8678	501	14.7705	926	22.3542	678	32.0059	1116	48.2079	1261	57.5734	589	59.0832	451	68.071	590	68.6441	555	68.8288	732	67.2131	815	70.184	588	12.7551
A115G	0.000601494	4.06166e-05	10.4935	0.535484	61.7307	0.664873	51.2372	0.853697	4435.5		A115G	5820	10.7216	3362	12.0464	5986	17.4073	4255	25.1234	6336	34.0278	6833	46.2608	3285	51.7199	2812	54.2319	3155	60.4754	2999	61.4538	4205	60.2854	4178	62.2068	3542	11.3778
A115T	0.0008615	5.9997e-05	14.1254	0.532913	61.3518	0.642542	47.2264	0.834779	6691.92		A115T	8048	14.662	4911	14.7831	8905	18.7647	6505	23.9969	9337	31.5198	10787	42.7459	5106	50.3917	4427	55.1389	4821	60.4646	4419	61.0319	6541	59.1806	6496	59.9138	5333	13.1071
C116A	0.00173209	0.000164735	5.4767	0.27399	29.0101	0.568646	23.5334	0.631212	7306.25		C116A	8903	5.14433	5307	6.19936	9555	7.15856	7079	7.92485	10811	10.6373	12238	16.032	5616	19.4623	4832	23.0132	5190	25.9538	4953	28.3263	6340	29.3218	6851	27.558	5489	4.73675
C116G	0.00176544	0.000349308	5.50609	0.581833	28.6967	1.15235	23.1906	1.2909	1460		C116G	1698	6.12485	962	4.7817	1939	7.99381	1433	7.32729	2241	9.54931	2440	16.1066	1122	20.2317	949	25.079	1059	27.4788	950	27.0526	1366	26.5007	1361	27.6267	1042	6.42994
C116T	0.00220998	0.000247674	4.88407	0.306396	29.3811	0.727372	24.497	0.789271	7004.75		C116T	8844	4.99774	4838	4.73336	9169	6.16207	7030	7.16927	10348	9.40278	11971	14.0924	5244	17.5629	4483	22.3065	5039	28.0016	4342	28.1207	6275	28.9402	6474	27.0158	5166	4.54897
T117A	0.00224334	0.00177273	4.93726	0.25227	6.9928	0.338734	2.05554	0.422351	13066		T117A	14297	4.79121	8531	5.017	15548	5.20324	11916	5.13595	18587	5.07344	21597	6.06566	10700	5.74766	9153	6.32579	10361	6.55342	9615	6.41706	12847	8.17311	13640	6.41496	8680	4.68894
T117C	0.00124978	0.000103944	8.10222	0.519304	57.3392	0.943916	49.2369	1.07734	5647.75		T117C	7556	7.98041	4379	9.18018	7913	11.7528	5705	15.4601	8253	22.719	9192	33.9099	4029	39.9106	3476	46.6053	3930	54.1221	3424	57.4474	4869	57.5478	5047	54.3689	4609	8.59189
T117G	0.00191679	0.00144265	5.42697	0.421632	9.04047	0.585659	3.61349	0.721644	1672.58		T117G	1832	4.85808	1110	5.85586	2008	5.57769	1561	6.59833	2371	5.86251	2840	7.78169	1315	6.76806	1189	6.81245	1315	8.36502	1217	9.12079	1629	10.2517	1684	8.55107	1134	5.55556
C118A	0.000886657	0.000222526	4.48051	0.102337	6.62107	0.102838	2.14057	0.14508	10824		C118A	11748	4.54545	7517	4.29693	12390	4.89104	9827	4.78274	15793	5.22383	18105	5.83264	8499	6.2125	7834	6.21649	8309	6.27031	8216	6.36563	10543	6.70587	11107	6.7525	7605	3.73439
C118G	0.020998	0.0368868	6.29504	0.38752	9.40697	1.78502	3.11193	1.8266	563.833		C118G	585	5.12821	313	7.98722	646	6.81115	526	5.13308	839	7.15137	954	6.7086	480	7.29167	394	7.36041	424	6.13208	393	8.6514	590	8.81356	622	8.68167	374	4.0107
C118T	0.00336792	0.000249572	4.77824	0.145371	23.8082	0.379366	19.03	0.406265	5235.67		C118T	6239	4.6001	3676	5.22307	6751	5.51029	5230	5.67878	7771	7.56659	8858	9.77647	4047	13.2444	3527	16.8415	3801	20.442	3418	22.2645	4616	22.812	4894	22.3335	3919	3.75096
T119A	0.001404	0.00120559	4.93516	0.230464	6.43835	0.252205	1.5032	0.341645	16624.6		T119A	17861	4.74218	10915	4.93816	19379	5.19635	14720	5.19022	23421	5.35417	27086	5.83696	14013	5.48063	11781	6.44258	13031	6.00875	12781	5.53165	16749	7.16461	17758	6.57732	11278	4.64621
T119C	0.00358321	0.000324075	5.92877	0.171377	23.5618	0.414365	17.633	0.448407	10623.8		T119C	12528	5.73914	7135	6.33497	13172	6.2481	10412	7.03995	15868	8.41946	17804	10.6044	8414	13.5845	7418	15.9881	7637	19.89	7156	21.5204	9761	23.389	10181	22.1982	7849	5.351
T119G	0.000646265	0.000549173	4.41834	0.396268	6.77649	0.357041	2.35814	0.533392	2318.83		T119G	2535	4.81262	1565	4.66454	2647	4.26898	2156	4.6846	3276	5.61661	3766	6.34626	1909	6.18125	1667	6.29874	1849	6.81449	1694	6.37544	2333	8.27261	2429	5.80486	1520	3.75
G120A	0.00555359	0.00604931	5.23992	0.213193	6.91223	0.421304	1.67231	0.472174	7254.58		G120A	7983	5.17349	4679	5.30028	8753	5.06112	6514	5.00461	10166	5.67578	12174	5.7746	5854	6.08131	5196	5.73518	5644	6.23671	5372	5.75205	7208	7.75527	7512	6.69595	4886	4.52313
G120C	0.000289787	3.16169e-05	20.0314	1.13898	72.3849	0.82638	52.3535	1.40719	1183.08		G120C	1580	21.0759	813	21.6482	1524	33.6614	1082	40.6654	1504	56.1835	1925	62.8052	904	65.9292	821	69.5493	921	70.9012	824	72.3301	1160	70.6897	1139	73.6611	891	22.7834
G120T	0.00167823	0.000920551	6.77347	0.443075	11.7834	0.589116	5.0099	0.737138	6537.25		G120T	7513	6.84147	4277	6.82722	7843	7.19113	6055	7.49794	9204	7.42069	11119	9.0116	5477	11.2653	4686	9.70977	4998	11.3045	4679	10.6219	6225	13.6225	6371	10.7361	4496	6.20552
G121A	0.000912721	9.53102e-05	5.79772	0.574344	48.7566	1.03336	42.9589	1.18225	5080.42		G121A	6487	6.19701	4017	6.39781	6723	10.3823	5031	13.1385	7285	20.8785	8211	32.3347	3778	37.7978	3229	42.3041	3481	49.5547	3373	47.5838	4663	46.7939	4687	46.7036	4315	6.30359
G121C	0.002128	0.00110284	6.9408	0.693947	16.6345	1.14734	9.69372	1.34087	1275.42		G121C	1394	6.81492	906	6.51214	1596	7.26817	1192	7.55034	1840	10.2717	2137	10.6224	939	12.886	922	11.9306	939	12.5666	893	16.4614	1203	20.1164	1344	15.8482	900	5.88889
G121T	0.000442398	0.000123499	11.0593	1.30151	35.8788	1.28432	24.8195	1.82849	4308.67		G121T	4711	12.1842	2707	12.1906	5086	13.8812	4023	18.8914	6736	24.9703	7898	32.274	3249	28.7781	2683	29.4447	3257	37.3043	3043	36.51	4075	36.7853	4236	34.6081	2891	11.0342
A122C	0.00114416	0.000140722	6.07193	0.541086	40.9857	1.03021	34.9137	1.16366	903.167		A122C	1188	5.80808	684	7.30994	1202	8.81864	855	12.2807	1351	16.3583	1426	25.7363	659	29.2868	586	33.4471	605	38.5124	598	42.9766	833	41.2965	851	38.1904	661	6.20272
A122G	0.000844993	7.66417e-05	6.70484	0.441692	42.5531	0.724998	35.8482	0.848949	8755.92		A122G	11225	7.05568	6597	7.09413	11540	10.4159	8462	13.992	12315	20.6496	13867	29.1772	6705	32.2595	5922	36.4235	6224	42.786	5918	41.6019	8067	42.0726	8229	41.6332	7006	6.76563
A122T	0.00095855	8.74974e-05	8.12614	0.482964	45.8691	0.771635	37.743	0.910316	10781.3		A122T	13701	8.29137	7838	8.75223	14395	11.5457	10707	15.728	15584	20.8162	17463	30.5904	7866	35.5708	6979	38.9168	7479	45.0194	7083	46.4634	10109	45.2567	10172	43.718	8445	8.13499
A123C	0.00073308	3.38798e-05	6.12346	0.304721	58.6847	0.538743	52.5613	0.61895	1264.75		A123C	1724	5.85847	1105	8.32579	1870	12.4064	1318	18.9681	1810	27.2928	1935	39.7933	893	48.4882	760	51.7105	795	56.3522	799	57.6971	1112	58.1835	1056	57.5758	1085	9.58525
A123G	0.000546779	4.86126e-05	6.35964	0.65746	59.9397	0.9547	53.5801	1.15918	9009.92		A123G	12023	7.17791	7180	7.96657	12288	13.623	8724	20.7818	12619	33.2911	13944	46.0055	6499	49.3307	5582	54.2637	6193	59.2605	5922	60.9254	8694	57.879	8451	58.4546	7544	7.70148
A123T	0.000481879	2.80737e-05	7.61994	0.479398	65.6504	0.650307	58.0304	0.807912	8813.75		A123T	12737	7.97676	7171	10.2217	12576	16.9847	8815	24.9915	12056	38.1636	13356	51.3702	6139	55.7908	5546	60.9448	6094	65.3594	5444	64.2542	7940	64.0554	7891	64.8967	7516	9.53965
A124C	0.000513814	6.43658e-05	8.379	1.048	64.9188	1.35814	56.5398	1.71547	1552.33		A124C	2157	9.04033	1291	11.1541	2179	16.7967	1516	21.8338	2147	37.4942	2310	52.5974	1155	55.2381	915	60.1093	1036	65.7336	1007	62.2642	1430	62.3077	1485	63.569	1334	8.32084
A124G	0.000488358	2.87786e-05	7.74356	0.476954	63.8705	0.631902	56.1269	0.791697	5640.92		A124G	7805	7.96925	4550	10.6813	7691	16.6428	5550	24.3243	7569	36.4117	8694	50.3106	4139	55.6173	3422	59.5266	3873	62.174	3642	61.642	5574	62.2533	5182	63.9521	4745	9.90516
A124T	0.000362618	2.47897e-05	8.3387	0.607075	66.8986	0.711818	58.5599	0.935534	8686.92		A124T	12237	8.55602	6931	12.6966	12091	19.7833	8376	29.6681	11527	42.4135	13246	56.5076	6281	60.8183	5599	62.6719	6148	65.9727	5825	66.0258	8003	65.3005	7979	65.6849	7219	11.2342
G125A	0.000384055	2.57444e-05	9.54947	0.630785	67.7034	0.675086	58.1539	0.923922	11007.2		G125A	14335	9.9407	8265	13.3696	14709	20.2053	10548	30.3375	15059	42.6854	17269	56.5232	8204	61.1531	7175	63.2613	7905	66.2366	7265	67.5017	10676	65.5208	10676	67.2349	8823	11.368
G125C	0.000400299	3.54169e-05	9.0444	0.780459	65.392	0.911831	56.3476	1.20023	2219.33		G125C	2997	9.77644	1824	12.0614	3191	18.8656	2224	28.2824	3035	40.8237	3519	54.5325	1537	59.5966	1359	61.2215	1497	62.7255	1409	65.5784	2003	62.1568	2037	65.3412	1959	9.23941
G125T	0.000388885	2.81681e-05	8.56105	0.66078	67.5524	0.786757	58.9913	1.02743	3597		G125T	5039	9.3074	2748	11.099	5271	19.6357	3674	29.3141	5190	43.2177	5683	55.2349	2527	59.2006	2039	63.6587	2317	68.0621	2252	67.3623	3273	65.8112	3151	65.7569	3004	11.4181
T126A	0.00042358	3.40525e-05	8.12028	0.660921	62.8845	0.831574	54.7642	1.06223	6790		T126A	9276	8.84002	5582	10.301	9640	17.7905	6793	26.4979	9584	38.2617	10361	50.7673	4764	56.9689	4128	59.7141	4593	61.4849	4403	63.7974	6174	61.0625	6182	60.3041	5919	10.3227
T126C	0.000477733	2.64114e-05	6.94848	0.421223	61.904	0.599857	54.9555	0.732978	4045.17		T126C	5820	7.21649	3375	10.3704	5740	14.9303	4014	23.6173	5519	36.4921	6123	48.5056	2852	53.8569	2491	55.8009	2821	60.4396	2633	61.4888	3628	60.5292	3526	61.3727	3476	9.29229
T126G	0.000561327	5.39734e-05	7.46649	0.720621	61.6874	1.05381	54.2209	1.27664	640		T126G	917	8.06979	544	9.55882	919	14.6899	588	21.4286	895	34.1899	1007	46.3754	458	52.8384	415	57.5904	422	62.7962	398	62.0603	556	57.3741	561	59.893	566	7.42049
A127C	0.00064271	6.43455e-05	7.46829	0.766934	62.2709	1.11779	54.8026	1.3556	573.833		A127C	777	8.23681	427	7.49415	785	15.5414	574	21.9512	832	31.7308	911	43.798	396	53.0303	342	58.4795	406	61.0837	382	57.0681	514	61.6732	540	62.2222	504	7.7381
A127G	0.000533672	3.07017e-05	6.73772	0.429567	61.169	0.624115	54.4313	0.757659	4928.25		A127G	6607	6.6596	4013	9.91777	6845	14.843	4877	21.9602	6551	33.8574	7757	46.3968	3631	50.4544	3153	56.4225	3351	60.37	3125	61.568	4575	59.6503	4654	60.0774	4066	7.94393
A127T	0.000564436	2.85071e-05	6.74087	0.383773	62.0467	0.559287	55.3058	0.678295	4257.83		A127T	5733	7.09925	3497	9.35087	5979	14.0324	4225	21.2544	5782	33.9502	6571	46.1574	2989	54.2656	2759	56.3972	3035	59.7364	2691	60.3122	3885	60.2317	3948	62.0567	3647	7.81464
A128C	0.00093958	5.5627e-05	6.25269	0.326555	47.4081	0.553351	41.1554	0.642523	1947.83		A128C	2325	6.75269	1368	7.16374	2573	9.59969	1971	13.6479	2826	21.1607	3177	30.7208	1538	37.2562	1293	40.8353	1402	44.5792	1327	45.6669	1764	48.0159	1810	45.7459	1492	6.16622
A128G	0.000851066	8.04365e-05	7.2752	0.563329	50.857	0.906522	43.5818	1.0673	8365.75		A128G	10788	7.74935	6452	8.07502	10966	11.4171	8163	16.7463	11998	22.5704	13246	35.2861	6305	39.9048	5514	45.4298	5764	50.0867	5652	50.3008	7586	48.7609	7955	49.428	6943	7.2303
A128T	0.000854882	3.63857e-05	6.85394	0.255308	51.8126	0.421013	44.9586	0.492376	11384.8		A128T	14617	6.95081	8687	8.00046	14967	11.3917	10989	16.2162	16312	23.9762	17849	33.9907	8608	40.4159	7434	47.1482	8200	49.6098	7602	51.5259	10667	50.5484	10686	50.365	8976	7.041
A129C	0.000673248	0.000238898	35.4408	1.59799	56.6613	1.25415	21.2205	2.03137	1655.67		A129C	1728	36.9213	1063	35.0894	1919	38.4054	1458	38.4088	2286	44.1382	2761	50.6338	1356	52.3599	1231	56.2145	1350	55.8519	1199	58.7156	1722	58.1301	1795	51.4206	1187	34.1196
A129G	0.00146056	0.0001247	7.22923	0.299551	33.5177	0.533674	26.2885	0.611995	6576.92		A129G	7897	7.07864	4665	7.35263	8379	9.12997	6175	10.915	9436	14.5189	10792	19.394	5193	24.0709	4557	27.3645	4744	30.3752	4583	32.6642	6200	34.6452	6302	31.8946	4905	6.80938
A129T	0.00146571	0.00016877	7.33616	0.367744	30.6282	0.633356	23.292	0.732377	11202.9		A129T	13168	7.44988	8054	7.06481	14127	9.25887	10583	10.2995	16228	13.4397	18463	18.399	8759	22.3427	7787	24.9518	8289	28.9661	7697	29.3361	10347	31.8353	10933	28.7112	8316	6.12073
C130A	0.000475661	0.000218478	4.41777	0.358146	8.42573	0.332108	4.00796	0.488431	3080.42		C130A	3473	4.49179	2042	4.26053	3669	5.50559	2752	5.30523	4459	6.34671	5201	7.86387	2400	7.54167	2246	8.05877	2431	7.69231	2201	7.86006	2926	9.84279	3165	7.96209	2204	3.67514
C130G	0.000764714	0.000329272	5.34657	0.48299	11.575	0.524481	6.22839	0.712993	2100.83		C130G	2312	5.92561	1302	5.14593	2410	5.80913	1873	5.92632	3044	8.50854	3609	9.91965	1716	9.44056	1487	9.21318	1632	10.5392	1581	11.3219	2075	12.7229	2169	11.941	1489	5.37273
C130T	0.000536098	0.00038294	3.17349	0.411825	6.20907	0.397293	3.03559	0.572225	8437.33		C130T	9312	3.25387	5356	3.19268	9931	3.51425	7777	4.16613	12170	4.83977	14227	5.46145	6486	5.16497	5966	4.81059	6619	6.85904	6336	5.77652	8396	8.09909	8672	5.58118	5854	3.21148
A131C	0.000355676	0.000124881	4.62216	0.332358	9.44863	0.288363	4.82647	0.440017	2850.83		A131C	3149	4.66815	1871	4.43613	3455	6.13603	2614	6.38868	3940	7.36041	4748	8.74052	2342	7.98463	2028	8.62919	2253	9.76476	2196	8.83424	2683	10.1379	2931	9.68953	1968	4.97967
A131G	0.00106645	0.000411996	4.90683	0.269539	8.87917	0.312015	3.97234	0.412316	9638.17		A131G	10678	4.93538	6177	4.92148	11529	5.18692	8969	5.66395	13736	6.26092	16024	7.13305	7823	7.8103	6846	7.77096	7547	8.30794	7069	8.43118	9358	10.3334	9902	8.24076	6668	4.69406
A131T	0.00415032	0.000394013	6.45306	0.262001	35.2652	0.73704	28.8121	0.782223	12969.8		A131T	15631	6.42313	9202	6.10737	16512	7.14026	12501	8.10335	19238	10.053	22016	13.3312	10376	18.2055	8800	21.3295	9118	28.6795	8564	31.5974	11671	34.273	12008	33.1612	9576	5.54511
G132A	0.0014686	0.00100493	4.02529	0.252511	6.19665	0.308307	2.17136	0.398516	6675.67		G132A	7433	3.90152	4194	3.8865	7797	3.96306	6163	4.85153	9627	4.99636	11301	4.81373	5403	5.45993	4500	5.53333	5378	5.37374	4931	5.55668	6443	7.21713	6938	6.26982	4636	3.90423
G132C	0.000495512	3.73237e-05	7.91444	0.658803	65.3411	0.796254	57.4266	1.03346	2453.75		G132C	3076	8.61508	1731	9.99422	3224	16.6873	2276	25	3444	36.7596	3836	51.8248	1890	56.3492	1628	61.855	1743	62.5932	1677	64.4603	2433	63.7074	2487	64.4954	2065	7.74818
G132T	0.000257888	0.000107963	6.20661	0.498658	11.9208	0.376612	5.71415	0.624897	8064		G132T	8891	6.17478	5208	6.72043	9771	7.8907	7274	8.81221	11269	9.68143	13261	11.4773	6660	11.7417	5687	10.2866	6498	12.2653	5995	10.5421	7896	13.3612	8358	11.8449	5391	6.80764
A133C	0.000590525	0.000115848	12.9562	0.720196	32.1213	0.676709	19.1651	0.98824	1270.25		A133C	1272	12.2642	757	14.2668	1425	16.1404	1102	18.6933	1763	22.1781	2106	25.2137	1021	29.7747	960	28.5417	1036	31.5637	997	34.2026	1354	33.0133	1450	30.3448	827	10.1572
A133G	0.000697998	5.08949e-05	6.76411	0.53177	61.4573	0.836058	54.6932	0.990844	4863.33		A133G	6637	6.79524	3790	9.1029	6519	12.9621	4769	20.2349	6978	29.6933	7593	43.3426	3540	49.3785	3156	55.2281	3492	60.3952	3008	62.4003	4550	57.8462	4328	61.1599	3995	8.23529
A133T	0.0020885	0.000324298	9.7753	0.400291	28.0036	0.643983	18.2283	0.758253	8283.75		A133T	9028	9.52592	5345	10.421	10148	10.81	7485	11.5431	11621	12.9249	13647	17.3078	7055	19.3338	5909	23.0665	6461	25.9557	5872	27.0947	8339	28.7804	8495	25.8976	5610	9.69697
G134A	0.00145959	0.000182843	45.1574	0.628698	71.5516	0.579972	26.3942	0.855353	5083.33		G134A	5482	44.9653	3394	46.4054	6018	47.7733	4573	46.9058	7015	51.675	8404	58.1747	4139	61.2467	3753	67.0397	3872	69.8089	3741	70.3823	5291	70.7995	5318	70.2708	3411	44.4738
G134C	0.00027714	8.84794e-05	62.6178	2.07553	86.9413	0.923281	24.3236	2.27162	702.583		G134C	751	64.98	450	63.7778	833	66.7467	614	69.7068	964	79.9793	1209	84.6981	573	83.4206	557	85.9964	536	87.3134	513	87.5244	692	83.6705	739	86.4682	443	69.7517
G134T	0.00103713	0.000183307	44.3405	1.00707	72.3194	0.844853	27.9789	1.31452	4573.92		G134T	5022	42.6523	3124	44.8784	5514	48.6036	4011	50.0125	6242	53.3963	7842	59.7807	3892	62.9239	3243	68.5168	3647	71.7302	3117	73.7889	4418	70.4165	4815	71.0073	3020	43.5762
A135C	0.000355286	8.84207e-05	66.6739	1.3161	86.9732	0.615999	20.2992	1.45312	1272.67		A135C	1298	66.9492	839	64.6007	1517	72.973	1137	74.6702	1661	78.3263	2188	82.0841	1018	85.2652	891	85.073	1019	88.1256	978	87.5256	1307	85.4629	1419	86.6808	854	68.3841
A135G	0.000358999	3.49148e-05	13.4601	1.00213	70.3674	0.889488	56.9073	1.33994	4848.58		A135G	6066	14.1609	3630	17.4105	6282	23.9414	4612	34.4753	6684	47.3968	7632	60.2856	3681	62.8634	3383	66.5386	3619	71.5115	3257	70.4636	4639	67.3852	4698	68.9017	3800	15.8158
A135T	0.000424077	5.63227e-05	74.0272	0.513487	88.8995	0.252311	14.8723	0.572127	6365.92		A135T	6491	74.2721	3886	75.7334	7340	76.2398	5525	77.991	8516	82.7149	10726	85.5771	5153	86.6291	4932	87.5507	5101	88.8649	4850	89.2577	6700	88.4627	7171	88.4117	4134	74.2622
G136A	0.000314847	4.67731e-05	76.321	0.559812	90.2444	0.247808	13.9235	0.612208	4319.92		G136A	4245	76.9611	2791	76.9975	5132	78.8776	3709	82.3672	5942	84.8536	7526	88.0547	3526	88.3721	3330	89.1892	3496	90.3032	3224	90.6328	4412	89.4152	4506	90.1909	2895	78.6528
G136C	0.00035792	0.000101198	46.2502	2.44217	82.9731	1.4009	36.7229	2.81545	424.917		G136C	551	46.2795	328	53.0488	557	50.2693	367	61.0354	609	66.9951	688	78.0523	332	75.9036	272	76.1029	357	85.4342	284	81.6901	389	83.0334	365	80.8219	332	50
G136T	0.000343852	5.30435e-05	69.6474	0.796415	89.112	0.368031	19.4645	0.877339	4393		G136T	4690	69.8294	2952	69.8848	5220	74.7126	3827	77.0055	6350	80.6614	7427	85.8085	3683	86.397	3157	87.8366	3512	89.0661	3098	89.6385	4354	88.1488	4446	88.8889	3074	72.8042
A137C	0.000425581	4.6414e-05	34.3268	1.05011	78.6762	0.693627	44.3495	1.25851	899.833		A137C	1158	35.7513	689	35.9942	1143	40.7699	822	50	1211	58.7118	1448	68.0249	687	74.6725	590	75.9322	689	76.6328	606	80.033	862	77.8422	893	76.3718	730	37.3973
A137G	0.000376077	2.54148e-05	9.28685	0.579293	63.6985	0.657929	54.4117	0.876614	5050.67		A137G	6846	9.65527	3964	12.3865	6794	20.0618	4900	29.0816	6949	40.4519	7774	53.01	3774	57.8696	3354	60.0775	3466	63.7046	3244	62.7928	4738	61.4605	4805	62.9969	4284	11.1345
A137T	0.000304591	2.68427e-05	46.9427	0.86591	85.5093	0.395978	38.5666	0.952155	5949.58		A137T	6589	46.092	4061	51.3913	7106	56.5578	5203	63.3673	7947	70.341	9654	78.7653	4865	81.4183	4163	82.945	4549	85.6012	4361	85.9207	6176	84.6826	6721	84.9576	4042	47.6744
G138A	0.000223245	1.61898e-05	59.4125	0.591813	88.5903	0.223751	29.1779	0.632699	5606.5		G138A	5805	59.845	3657	61.3071	6784	68.4847	4830	73.4783	7702	80.3298	9459	84.3324	4640	86.0345	4253	87.1385	4598	87.7555	4121	89.1046	5696	88.4831	5733	88.4528	3947	61.135
G138C	0.000312536	4.63952e-05	50.8371	1.29492	84.5219	0.608344	33.6848	1.4307	783.917		G138C	852	51.7606	495	50.101	906	59.8234	716	65.3631	1098	70.765	1347	78.3964	638	82.1317	548	83.2117	617	83.3063	608	84.7039	804	82.5871	778	84.9614	525	48.9524
G138T	0.000348596	4.05112e-05	54.2562	0.960482	85.8663	0.457706	31.6101	1.06396	5048.83		G138T	5355	53.6881	3257	58.0596	6130	61.3051	4612	64.9176	7363	73.5162	8765	79.8403	4077	80.8192	3305	84.9924	4049	85.0333	3669	86.6176	4943	84.7663	5061	85.3586	3547	55.85
A139C	0.000428627	3.77559e-05	15.6533	0.894412	72.899	0.829271	57.2456	1.2197	480.833		A139C	666	15.7658	361	18.8366	674	25.5193	449	37.4165	683	45.5344	727	59.8349	336	63.3929	321	71.028	358	71.2291	332	72.5904	408	70.098	455	73.1868	404	18.0693
A139G	0.000414399	3.40324e-05	11.874	0.749808	66.1379	0.778566	54.2639	1.08092	5314.25		A139G	7054	12.5886	4177	14.5559	7189	21.2964	5159	29.5988	7417	42.9958	8203	54.4313	3873	58.9724	3471	62.1147	3628	63.5336	3498	66.6953	5068	62.8848	5034	67.1236	4423	12.5028
A139T	0.000463506	6.21915e-05	40.4036	1.15484	78.1582	0.729471	37.7546	1.36593	5549.5		A139T	6302	40.019	3900	43.1282	7012	47.7895	5037	50.9827	7616	59.4013	9282	69.5324	4557	73.7766	3879	73.189	4144	77.8234	3967	77.3885	5242	76.0778	5656	78.819	3865	39.3273
G140A	0.000470835	2.63329e-05	5.12125	0.359438	54.7389	0.579733	49.6176	0.682119	9067.17		G140A	12835	5.26685	7250	8.26207	12790	12.6974	9115	20.1975	12554	31.6473	13730	42.8551	6389	47.8479	5570	50.9874	6305	53.2435	5664	55.226	8262	52.8565	8342	53.4284	7623	6.992
G140C	0.00043764	4.0475e-05	20.8682	0.99618	76.1509	0.791016	55.2827	1.27204	648.833		G140C	843	20.4033	486	23.8683	857	32.5554	604	37.9139	902	50.5543	1049	63.1077	469	67.1642	411	73.4793	435	71.954	475	77.0526	624	74.8397	631	76.2282	451	19.2905
G140T	0.000994311	0.000110284	50.4189	0.712067	80.5217	0.530109	30.1028	0.887725	5057		G140T	5686	49.6834	3342	50.5685	6160	53.8961	4631	56.7696	7178	60.7133	8337	67.3983	4245	72.2733	3420	75.4386	3941	77.8229	3584	80.8594	5120	78.418	5040	81.2698	3416	48.4192
C141A	0.0003099	3.04223e-05	20.002	1.00082	68.9991	0.704293	48.9971	1.2238	3910.17		C141A	4389	20.9387	2749	23.1721	4695	30.2023	3538	40.0226	5513	52.4215	6355	60.4249	2993	61.8443	2735	63.5832	3064	69.0274	2792	69.5559	3993	67.9689	4106	69.3376	2825	21.6283
C141G	0.000189009	2.09625e-05	24.0806	1.04144	64.888	0.589192	40.8073	1.19655	1149.58		C141G	1192	24.1611	741	30.2294	1312	35.8232	1047	48.4241	1539	53.9961	1910	59.9476	975	60.8205	863	61.993	931	62.8357	814	66.2162	1249	64.9319	1222	66.0393	747	27.8447
C141T	0.000327313	2.40003e-05	20.4694	0.84724	76.8377	0.58936	56.3683	1.03207	11124.2		C141T	13847	20.7121	7759	24.5908	13999	33.3738	10090	41.328	15348	55.4861	17847	66.7787	8645	70.9427	7538	72.3269	8347	75.9195	7736	77.3139	11318	74.9691	11017	76.7087	8485	24.7142
G142A	0.000530616	3.24451e-05	6.10106	0.363524	49.82	0.566836	43.7189	0.673389	10955.8		G142A	15097	6.17341	8453	8.41121	15391	12.3384	10932	19.2554	15457	27.5086	17215	37.6242	7601	43.0207	6971	46.3061	7407	50.2903	7133	49.5023	9818	48.8796	9995	47.5838	9122	6.88446
G142C	0.000397595	4.02755e-05	17.3257	1.10771	74.8513	0.90518	57.5256	1.43051	569.833		G142C	721	17.4757	407	21.6216	777	27.1557	568	39.7887	761	48.6202	916	62.1179	419	67.0644	371	75.4717	443	70.8804	369	75.0678	537	73.5568	549	73.5883	438	20.3196
G142T	0.000433734	3.2385e-05	21.9105	0.798875	74.9449	0.609542	53.0344	1.00486	4059.92		G142T	4981	22.104	2808	25.3917	5212	31.2164	3794	39.3253	5725	49.6943	6617	62.9893	3167	69.3085	2609	71.8666	3169	73.4617	2775	74.1261	3967	73.2039	3895	73.9409	2958	23.3266
A143C	0.000331675	7.71676e-05	25.0389	2.7319	78.4147	1.70295	53.3758	3.21921	374.833		A143C	439	27.7904	263	27.3764	459	34.8584	332	41.8675	521	58.3493	611	71.3584	288	73.9583	262	74.0458	320	81.25	280	78.5714	341	74.4868	382	73.2984	292	28.7671
A143G	0.000460257	5.84266e-05	18.848	1.25539	70.1161	1.04545	51.2681	1.6337	4165		A143G	5039	20.9367	3017	20.6165	5486	25.5377	3892	34.0185	5842	46.8504	6442	59.081	3122	63.8053	2738	63.3309	3108	68.9833	2939	69.9558	4154	67.7179	4201	70.0071	3246	19.1929
A143T	0.000326385	3.4015e-05	36.2807	1.04135	79.3016	0.59582	43.0209	1.19975	4563.92		A143T	5445	36.8779	3297	40.2184	5573	45.1104	4175	51.5449	6177	63.0889	7413	72.211	3657	75.3897	3130	76.3898	3418	79.5494	3184	77.9209	4522	77.5763	4776	78.8945	3308	37.6663
A144C	0.000458413	5.88713e-05	6.46153	1.06531	63.1997	1.36722	56.7382	1.73326	711.5		A144C	890	7.64045	527	7.59013	903	16.0576	707	25.1768	995	35.9799	1153	49.4363	480	57.7083	454	60.1322	544	65.0735	500	62.2	712	58.1461	673	61.9614	553	10.1266
A144G	0.000387283	3.19676e-05	11.9867	0.810456	68.4193	0.782824	56.4325	1.12679	4889.67		A144G	6137	12.6446	3711	15.0364	6280	22.7229	4787	30.9171	6771	44.7349	7775	57.5177	3631	61.6635	3231	63.9431	3667	66.0758	3272	69.0403	4771	65.8772	4643	68.4902	3849	15.0429
A144T	0.000510852	4.60113e-05	26.5008	0.940154	76.407	0.69049	49.9062	1.16648	4141.33		A144T	4829	26.9414	2863	29.4097	5189	33.9757	3838	40.568	5874	51.2428	6914	62.7278	3256	70.1167	2921	74.3239	3238	76.1581	2750	75.2	3923	73.9485	4101	74.7623	3109	27.4365
C145A	0.000336722	3.50756e-05	22.0263	1.12632	74.7964	0.798709	52.7701	1.38077	2532.83		C145A	3137	23.1431	1825	23.726	3303	33.6966	2243	42.354	3424	54.0596	4183	65.8618	2060	66.9903	1775	70.4789	1923	74.259	1680	74.2262	2371	73.1759	2470	75.4656	1879	26.7163
C145G	0.000468627	6.42213e-05	14.362	1.15508	63.3523	1.20377	48.9903	1.66831	834.75		C145G	1112	13.5791	589	19.3548	1135	23.2599	815	28.3436	1118	39.356	1336	52.9192	736	55.0272	577	56.3258	595	61.6807	568	59.8592	681	63.7298	755	65.298	623	16.8539
C145T	0.000402175	2.23153e-05	11.7328	0.535258	69.564	0.544256	57.8311	0.763358	7676.92		C145T	10299	11.5448	5698	16.1109	10106	22.8181	7229	31.7886	10274	44.0627	12381	56.6836	6001	62.5229	4880	64.2623	5612	68.4961	5177	70.3496	7138	67.9462	7328	68.9001	5712	15.2486
G146A	0.000467067	2.88795e-05	9.33614	0.52909	64.3941	0.631529	55.058	0.823872	17277.4		G146A	22855	9.79217	13419	11.9159	23530	18.1513	16969	26.7547	23934	38.2176	27384	50.8472	12799	57.6451	11081	59.5795	11995	64.1851	11188	63.6754	16171	62.272	16004	63.3092	14405	11.2044
G146C	0.000544732	8.48879e-05	6.10676	0.990374	50.7751	1.44299	44.6683	1.75016	1516.75		G146C	1974	8.15603	1162	6.19621	2046	11.7791	1502	17.6431	2154	29.1551	2515	39.2445	1064	45.0188	971	46.9619	1045	48.7081	979	52.809	1379	48.2959	1410	47.9433	1248	6.89103
G146T	0.000289255	2.18625e-05	9.81632	0.778681	71.4426	0.764329	61.6263	1.09112	2737.58		G146T	3680	10.1902	2001	14.1929	3633	24.8004	2706	37.3245	3906	48.4639	4498	61.5607	2082	66.5706	1629	66.4825	1842	72.367	1781	69.3431	2578	69.744	2515	71.4911	2233	14.3753
T147A	0.000545386	3.89831e-05	6.19963	0.483905	55.257	0.720349	49.0574	0.867794	6531.83		T147A	8334	6.37149	4988	8.07939	8938	13.7727	6350	20.1417	9185	29.276	10338	42.1261	4796	47.2477	4286	51.0966	4702	54.7001	4347	54.8424	6035	53.1234	6083	54.266	5210	7.37044
T147C	0.000542025	6.08911e-05	6.44882	0.855686	60.0885	1.21481	53.6397	1.48592	6155.17		T147C	7834	7.45468	4832	7.90563	8353	13.8513	6268	21.3784	8640	31.4236	9967	47.4566	4379	53.14	3833	54.0308	4398	59.2087	3993	58.2019	5768	57.9924	5597	58.7636	5014	7.89789
T147G	0.000437335	4.26311e-05	7.55289	0.657684	50.3668	0.793928	42.8139	1.03096	973.25		T147G	1121	8.38537	701	8.98716	1354	14.4018	976	22.3361	1352	31.5089	1517	40.6724	736	42.2554	621	46.3768	707	50.495	663	51.8854	974	49.1786	957	49.0073	757	10.3038
G148A	0.000799396	7.78329e-05	5.15815	0.488201	43.5872	0.86586	38.4291	0.994009	6027.58		G148A	7547	5.47237	4481	6.27092	8078	8.97499	5966	13.5099	8805	19.2277	9982	30.3747	4327	36.4456	4016	37.8486	4144	42.9054	3785	42.2721	5625	43.3422	5575	41.2018	4872	4.98768
G148C	0.000842307	0.000100308	8.92586	0.894909	60.7017	1.26451	51.7758	1.54915	548.833		G148C	625	7.84	407	12.0393	725	14.6207	562	21.3523	746	28.0161	925	40	380	48.4211	361	49.8615	394	61.4213	412	61.165	560	58.0357	489	60.3272	429	7.92541
G148T	0.000294978	2.16876e-05	8.38781	0.669571	67.0994	0.734323	58.7116	0.993758	2278.25		G148T	3109	8.94178	1993	12.1927	3077	22.2294	2196	34.8361	3003	45.6543	3541	56.9896	1899	61.2954	1364	62.4633	1590	68.6792	1374	66.23	2115	65.721	2078	66.2175	1882	10.5739
G149A	0.00139913	0.000158391	4.83368	0.370553	30.8273	0.726749	25.9937	0.815766	1811.42		G149A	2038	4.66143	1266	5.13428	2282	6.96757	1740	8.27586	2618	12.2231	3050	16.7541	1394	23.0273	1229	24.4101	1329	30.6998	1271	27.3013	1766	31.0872	1754	30.1026	1392	4.81322
G149C	0.00153442	0.000227956	17.9856	0.701826	48.9975	0.984367	31.0119	1.20894	879.667		G149C	1053	18.9934	669	19.2825	1164	18.9863	899	19.6885	1259	27.3233	1403	32.6443	709	36.2482	600	43.8333	606	44.0594	611	48.6088	796	47.6131	787	48.6658	655	14.9618
G149T	0.00133196	0.000178307	5.81063	0.573275	39.8338	1.13782	34.0231	1.27408	4630.33		G149T	5677	6.18284	3504	6.44977	6094	7.95865	4601	10.5412	6973	14.6565	7933	22.5136	3519	31.3725	2801	32.417	3362	40.6306	2937	37.9299	4021	39.0201	4142	36.4317	3540	5.64972
G150A	0.0017174	0.000145877	5.61936	0.272773	31.6348	0.557991	26.0155	0.621094	36185.5		G150A	42443	5.87376	26518	5.72064	46929	7.20663	36191	8.46619	54027	11.2499	61059	16.864	26888	22.0879	24257	26.0007	25178	29.8157	23596	30.7128	33689	30.9033	33451	29.5597	28003	5.303
G150C	0.00175569	0.000198578	7.39154	0.433584	37.3486	0.845866	29.957	0.950518	4562.5		G150C	5357	7.52287	3485	7.43185	5892	9.43652	4494	11.1927	7009	13.3257	7804	19.7975	3424	27.5117	3073	31.1747	3085	34.7488	2921	35.9808	4159	36.8117	4047	34.5935	3458	6.79584
G150T	0.00147754	0.000135257	8.07947	0.407167	41.3518	0.733399	33.2724	0.838844	18908.8		G150T	22572	8.32447	13808	8.22711	24709	10.4456	19353	12.4839	28188	16.1629	32368	23.4027	13946	30.5321	11967	35.8653	13258	40.0362	12036	40.4038	17468	38.7795	17233	39.819	14662	7.97299
G151A	0.000391058	1.98121e-05	12.5292	0.514026	71.997	0.497729	59.4678	0.715511	44952.5		G151A	60808	12.602	34491	16.845	60392	23.8475	42670	33.0138	60639	46.4899	69459	59.6971	34843	64.6242	29509	67.2371	32101	70.7361	29831	71.1843	42051	70.7141	42636	71.6765	35216	15.2715
G151C	0.00071199	2.96886e-05	33.9587	0.337566	73.2829	0.269696	39.3242	0.432073	17027.5		G151C	19518	33.6817	12464	35.7831	21867	38.8348	15841	43.2422	24735	50.4265	27795	59.3344	13116	65.6069	11542	69.1388	12289	71.2833	11866	73.0322	16724	72.0761	16573	72.7629	12729	32.7834
G151T	0.000475401	2.80258e-05	9.36486	0.542413	68.3682	0.64172	59.0034	0.840247	9559		G151T	12684	9.75244	7481	12.4582	13218	18.6791	9429	27.076	13618	40.3951	15259	53.8961	7195	60.0973	5739	63.7568	6563	67.7891	5943	67.6931	8882	66.0662	8697	67.2761	8158	11.5102
T152A	0.000364023	2.23831e-05	18.9337	0.466092	57.5076	0.383438	38.5739	0.603545	30681.2		T152A	35778	19.1626	21766	21.5106	38325	26.7397	28327	32.9827	41834	41.7436	50278	49.9284	24646	53.0309	21731	54.1531	23104	56.8776	21605	57.0424	29980	57.7752	30801	56.3521	23175	20.0086
T152C	0.000337909	2.18532e-05	22.2345	0.603436	68.1671	0.44707	45.9326	0.751004	25497.8		T152C	30629	22.3677	18881	25.3694	32282	32.656	23107	39.646	34335	49.7568	40945	59.5702	20576	63.9094	17694	64.8016	19286	67.7538	17808	67.8852	24950	67.3587	25481	67.2069	19153	24.226
T152G	0.000451815	4.16298e-05	11.3261	0.415793	36.3774	0.423184	25.0513	0.593269	6874.25		T152G	7758	11.0724	4685	13.2124	8558	15.95	6334	18.8349	9596	25.4273	11467	29.4236	5608	34.0942	4736	32.9392	5328	35.8108	4810	35.1351	6735	36.7483	6876	36.5183	5101	11.88
T153A	0.000309366	1.86949e-05	21.4527	0.441782	56.9515	0.32882	35.4988	0.550722	55023.5		T153A	62543	21.3709	38493	24.2538	68065	30.0933	49585	35.9968	74751	43.9272	90769	50.2187	44634	53.0313	39276	53.9795	42400	56.7594	39021	57.1026	54750	57.5324	55995	56.0014	40880	22.1502
T153C	0.000308741	1.99085e-05	21.2362	0.547183	62.8076	0.406051	41.5714	0.681385	44142.5		T153C	51395	21.3639	31931	24.4277	56376	31.0575	39736	38.328	59855	47.0303	71244	55.6426	35706	58.8781	31130	59.9872	32883	62.5034	31119	62.7237	43490	62.8857	44845	61.3067	33338	22.4759
T153G	0.000404837	2.97149e-05	15.6049	0.388326	43.2353	0.34679	27.6304	0.520635	16123.3		T153G	18111	15.4989	10989	17.1808	19695	21.0053	14868	25.8945	22158	31.3025	26589	36.1315	13354	39.7783	11360	40.625	12592	43.2259	11442	44.4415	16091	42.7755	16231	42.4681	11888	16.7143
T154A	0.000254988	1.22199e-05	16.2399	0.41251	60.8015	0.327312	44.5616	0.526591	37258.5		T154A	45800	16.1157	27416	20.9586	47164	28.2504	34160	37.137	49803	45.9912	59736	53.7214	29846	57.0261	25309	57.6119	28167	60.1164	25903	61.2825	36476	61.3225	37322	59.8762	29292	17.0797
T154C	0.000423063	6.23934e-05	5.02791	0.479481	26.6888	0.658993	21.6609	0.814968	51306		T154C	66820	5.0434	36600	6.12295	68100	9.04258	50322	13.0639	73671	16.6863	82589	21.5198	35614	23.165	34136	24.5987	36446	26.2004	35012	26.7765	46520	29.5271	49842	24.377	42224	4.49271
T154G	0.00028031	1.78091e-05	10.245	0.370806	43.7412	0.364917	33.4962	0.520252	13994.6		T154G	17313	10.0734	10232	13.4871	17940	18.9744	12771	25.0098	18833	32.1404	22260	37.3944	11298	40.5913	9728	40.7792	10357	43.893	9851	43.7519	13341	44.8467	14011	42.9234	10874	10.3734
G155A	0.000232231	1.77672e-05	50.6334	0.593944	80.7772	0.271646	30.1439	0.653116	59157.2		G155A	63389	50.6429	39350	53.5654	70697	59.7578	51388	64.9257	79003	71.0872	99230	76.8558	48736	78.1866	43879	79.6805	47337	80.7592	43293	80.3941	61379	80.7556	62206	79.973	40756	51.985
G155C	0.000257167	1.53383e-05	34.25	0.558382	74.5093	0.313061	40.2594	0.640154	18840.1		G155C	21730	34.3074	13302	37.8289	23263	45.4628	16753	52.4742	25199	60.7524	30858	68.4263	15079	71.8284	13425	72.7225	14482	74.1058	13466	73.667	19104	74.1729	19420	73.862	13786	35.2314
G155T	0.000296333	3.10592e-05	48.1394	0.82704	79.9523	0.424148	31.8129	0.929461	4826.58		G155T	5364	48.173	3225	50.2326	6006	56.0606	4375	62.5829	6579	67.6395	8094	74.4379	3806	76.4319	3617	78.131	3588	80.602	3364	79.4293	4970	80.4628	4931	78.4831	3455	48.5094
T156A	0.000205633	1.15496e-05	19.3795	0.526433	64.1457	0.350324	44.7661	0.632343	59909.7		T156A	69530	19.209	40900	24.9487	73040	33.8746	53009	42.3626	80188	50.9341	96758	58.6039	50011	60.9866	42204	61.2264	46776	63.5646	43691	64.313	60989	64.4624	61820	63.7917	43231	21.0127
T156C	0.000282542	3.21779e-05	4.43657	0.370064	26.0684	0.480216	21.6318	0.606263	38252.3		T156C	50567	4.40406	28441	6.33944	50884	9.94615	36866	14.4605	52912	18.0829	61419	22.2553	27240	22.9846	25235	24.8306	27641	26.1423	26074	26.1065	35140	28.1588	36609	24.4858	31226	4.39698
T156G	0.00025638	2.37617e-05	11.4831	0.543495	44.1361	0.505444	32.653	0.742199	4543.25		T156G	5709	11.3505	3346	14.9133	5771	19.9446	4185	28.3393	6197	33.8067	7239	36.7868	3706	40.5019	3126	43.2502	3376	43.987	3168	44.697	4212	44.302	4484	44.7591	3672	10.866
T157A	0.000184153	2.39439e-05	37.3158	0.961567	67.3886	0.485154	30.0727	1.07703	5230.25		T157A	5544	36.7244	3361	42.3386	6159	47.9623	4575	53.5082	7097	58.9686	8635	63.8564	4361	64.8475	3882	65.4817	4286	69.0154	3994	68.8282	5539	66.4019	5330	66.6229	3662	39.2682
T157C	0.00068828	0.0001006	5.0928	0.69562	45.2713	1.37934	40.1785	1.54482	561.833		T157C	878	4.6697	466	7.51073	795	10.3145	602	15.2824	783	22.2222	839	31.5852	395	36.2025	329	36.7781	390	43.0769	302	51.6556	498	42.5703	465	45.8065	567	4.7619
T157G	0.000287533	3.58584e-05	15.2644	0.724469	45.4019	0.616452	30.1375	0.951246	1218		T157G	1459	14.8047	875	18.0571	1550	24	1106	27.7577	1732	34.1224	1934	40.0207	927	42.2869	855	44.4444	911	43.0296	860	47.907	1186	45.2782	1221	44.7993	957	16.1964
C158A	0.00021977	1.96249e-05	58.5635	0.425266	76.9165	0.197113	18.353	0.468726	41929.2		C158A	42360	58.5198	25987	60.2686	48495	64.4994	35510	67.6767	56938	71.1844	70902	74.6298	35301	74.8619	32143	76.2281	34397	77.0707	31764	76.8386	44345	76.8317	45008	76.7153	27198	60.3978
C158G	0.000186806	4.58558e-05	39.7846	1.03497	56.9337	0.534736	17.149	1.16495	6997.58		C158G	7126	39.2226	4580	42.7074	8203	46.7634	5998	46.899	9413	51.8963	11765	55.8521	5849	55.9412	5216	57.4003	5600	57.3214	5259	56.3795	7450	56.8456	7512	55.5112	4642	40.2197
C158T	0.000266691	2.10353e-05	41.2917	0.740031	79.3402	0.372164	38.0486	0.828343	28607.8		C158T	31423	41.4251	19066	44.7813	35170	51.5951	25066	57.0374	38912	66.4114	47621	73.8036	22836	76.2437	20481	78.1993	22544	78.5353	21054	79.0966	29604	78.3171	29517	78.7783	20115	43.306
T159A	0.000301079	3.49546e-05	67.5304	0.344691	79.2732	0.175742	11.7429	0.386907	33039.4		T159A	32681	66.9869	20279	69.0665	37780	70.7517	28061	72.5099	44654	74.6921	56195	77.2044	28246	77.5543	24997	78.7815	27396	79.1429	25152	79.441	35459	79.3141	35573	79.0768	21366	68.2393
T159C	0.000220524	1.91429e-05	48.5403	0.565473	74.3875	0.275467	25.8472	0.629	19010.7		T159C	20155	48.2213	12382	51.486	22830	56.9251	16411	61.276	25615	66.3049	31827	71.0183	15808	71.5461	13865	73.1266	15557	74.6095	13988	73.942	19669	74.7115	20021	74.1721	13144	49.3685
T159G	0.000342111	5.26712e-05	20.351	0.777806	45.4473	0.630042	25.0962	1.00097	3415.92		T159G	4012	19.6162	2480	23.9516	4447	25.6802	3155	30.0792	4705	36.0468	5581	39.7957	2665	42.6266	2274	40.7652	2615	45.4302	2413	46.0423	3319	46.8515	3325	44.9624	2607	19.1791
C160A	4.69958e-05	0.000188785	86.2346	0.590506	86.781	0.217435	0.546443	0.629266	39545.7		C160A	37689	86.4045	24224	85.2708	45390	87.2549	33592	86.5206	53045	86.5322	67960	87.1189	32820	86.2096	30825	87.4712	33033	87.3097	30199	86.4168	42821	86.6117	42950	86.1839	24804	85.6394
C160G	0.000317471	0.00050305	73.1356	1.12357	76.093	0.642754	2.95739	1.29443	3833.08		C160G	3778	74.2721	2372	71.543	4489	74.0699	3257	72.5514	5057	74.9654	6421	76.717	3313	75.3094	2927	78.4763	3004	75.9321	2938	75.6297	4136	74.6373	4305	75.3775	2485	73.3602
C160T	0.000231437	2.43669e-05	71.0702	0.496903	88.2134	0.200549	17.1431	0.535848	20370		C160T	20527	71.1161	12652	72.5656	23751	76.4305	17401	78.9322	27622	82.7348	34511	85.9639	16828	87.188	15306	87.3971	16813	88.3542	15253	88.4023	21990	87.6671	21786	87.7628	13048	71.8348
T161A	0.0114181	0.00714567	90.4462	0.0984503	88.8639	0.2596	-1.58228	0.277641	30683.5		T161A	29965	90.3487	18323	90.7275	34388	90.5519	25113	90.3357	40761	90.0199	51968	90.4306	26195	90.2233	23444	89.9846	25923	89.7196	23872	89.1044	34014	88.9692	34236	89.2394	18943	90.1283
T161C	0.000183816	7.07867e-05	77.3298	0.583403	83.1292	0.263319	5.79939	0.640075	14549.6		T161C	14483	77.1456	8966	78.1062	16577	79.9481	12283	79.5815	19374	81.1139	24690	83.1592	12329	82.7561	11197	82.6382	11735	83.6898	11204	82.7562	15966	82.8949	15791	82.8447	9059	78.6511
T161G	0.0640516	0.0830086	84.1686	0.271716	78.6324	3.52089	-5.53617	3.53136	2984.92		T161G	2813	83.754	1775	84.4507	3385	84.1654	2524	83.7559	4011	84.5176	5050	84.4158	2585	82.6306	2352	83.3759	2510	84.7012	2346	82.0972	3250	81.3231	3218	81.0131	1809	83.4715
C162A	0.000226616	4.99137e-05	78.8571	0.766866	91.3246	0.297458	12.4675	0.822535	13177.8		C162A	13252	79.6484	8566	77.901	15342	82.7923	11136	85.4885	17069	87.4099	21897	89.7977	10748	89.5981	9660	89.9172	11072	91.4921	10164	91.2043	14683	91.3505	14545	91.5504	8418	79.4013
C162G	0.00032013	0.000112036	71.1443	1.35747	86.5591	0.694962	15.4148	1.52502	1217.17		C162G	1394	71.8077	841	72.4138	1481	74.4767	1068	75	1702	80.7873	1965	84.8346	1006	84.9901	864	86.6898	999	86.987	873	84.9943	1207	83.5128	1206	87.4793	871	70.4937
C162T	0.000230386	2.34469e-05	42.498	1.00982	81.9149	0.469845	39.417	1.11378	11954.6		C162T	13769	42.8571	8011	45.7246	14742	54.226	10620	61.516	15788	69.5085	19506	77.1557	9279	77.3251	8495	79.4585	9474	82.2989	8559	82.0306	12744	80.7203	12468	82.1383	8412	46.3505
T163A	0.000257837	2.79373e-05	58.952	0.917167	89.317	0.343641	30.3651	0.979431	11084.1		T163A	11398	59.063	6624	61.3829	12829	67.6592	9354	72.3113	14715	78.4574	18386	85.2116	9303	86.843	8311	87.9437	9031	89.1042	8481	89.6592	12324	88.3966	12253	88.7456	7052	60.5218
T163C	0.00024939	3.87432e-05	63.189	1.01878	87.6319	0.417607	24.4428	1.10104	5799.5		T163C	6519	63.1078	3502	66.4763	7080	69.1243	4806	75.6138	7655	79.2031	8769	84.4908	4959	84.5735	4609	85.8755	4760	87.7521	4322	88.4776	6562	86.1323	6051	88.1838	3968	64.869
T163G	0.000342458	7.85758e-05	34.8844	1.65212	68.0769	1.12874	33.1925	2.00089	314.083		T163G	400	33	222	44.1441	415	40.4819	271	47.9705	434	54.1475	513	62.5731	247	63.1579	194	65.4639	230	68.2609	196	65.3061	308	67.8571	339	68.7316	284	38.7324
T164A	0.000248616	2.20427e-05	40.6356	1.04966	86.1984	0.442522	45.5628	1.13913	8509.08		T164A	9155	41.1141	5515	45.8024	10048	51.9904	7373	61.7117	11336	71.0039	13872	80.1903	7042	83.0162	6145	84.6705	6818	85.861	6596	86.2038	9174	84.6087	9035	85.2684	5909	42.5283
T164C	0.000565382	5.8757e-05	12.5153	0.70988	54.8592	0.859295	42.3439	1.11459	7759		T164C	10462	12.5024	6047	14.0731	10792	18.9307	7723	24.5241	10947	32.8035	12253	42.6753	5639	47.7212	5057	47.3601	5371	51.8898	5121	52.314	6811	56.7905	6885	55.9041	6420	13.3022
T164G	0.000580298	0.000246263	22.9994	2.91133	57.8384	2.58394	34.8391	3.89263	107.5		T164G	124	22.5806	88	26.1364	111	28.8288	93	27.957	149	42.2819	200	47	85	51.7647	56	51.7857	83	61.4458	98	48.9796	100	52	103	66.0194	75	21.3333
T165A	0.000563439	4.17861e-05	15.5726	0.729546	72.1251	0.724376	56.5526	1.02808	2823.25		T165A	3686	15.7352	2216	19.9458	3856	22.666	2725	29.1009	3861	44.3408	4447	55.8579	2100	62.0952	1889	67.6019	2041	69.2308	1855	71.9677	2595	70.0193	2608	71.8942	2220	17.8378
T165C	0.000438606	3.50246e-05	25.7001	0.932856	80.7148	0.622049	55.0147	1.12123	4308.33		T165C	5189	26.8452	3143	28.126	5421	34.9013	4008	42.2405	5909	56.0162	6765	68.3075	3491	73.0163	2998	76.7845	3241	79.6359	3006	80.1065	4267	78.3923	4262	80.596	3182	30.2326
T165G	0.000355745	8.93772e-05	39.0446	2.39538	79.5096	1.33747	40.465	2.74348	406.667		T165G	469	40.9382	268	38.4328	449	48.9978	352	50	514	63.4241	700	73.5714	383	72.0627	307	76.873	326	81.5951	314	80.2548	403	76.4268	395	77.7215	262	44.6565
A166C	0.000429907	4.10333e-05	6.57513	0.58459	48.9781	0.802392	42.403	0.992763	531.583		A166C	736	6.79348	358	8.93855	693	14.2857	480	18.75	736	31.1141	870	39.5402	401	43.6409	358	44.4134	406	46.798	336	50.5952	488	46.9262	517	48.9362	408	8.33333
A166G	0.00044732	3.91849e-05	6.95776	0.63765	60.8657	0.972717	53.908	1.16309	3947.67		A166G	6288	7.7131	3649	8.98876	5987	15.6172	4110	24.6472	5561	36.1266	5862	49.2323	2695	54.2857	2102	53.4729	2519	59.3489	2298	60.0087	3151	58.9971	3150	61.0476	3819	9.84551
A166T	0.000914222	0.000154159	1.65209	0.241734	17.4543	0.797061	15.8022	0.832911	1534.25		A166T	2859	1.67891	1632	2.32843	2699	2.70471	1835	5.66757	2283	6.92072	2078	12.2233	860	11.8605	757	13.8705	794	16.4987	745	16.9128	968	17.6653	901	17.98	1735	1.26801
T167A	0.000584328	6.01081e-05	10.6136	0.866528	66.1821	1.10327	55.5685	1.40288	5696		T167A	8257	11.6144	4723	12.4074	8221	17.6742	5633	24.3032	7811	36.1285	8745	51.3894	4152	59.2486	3464	59.9596	3875	64.129	3429	64.1295	5033	63.2029	5009	66.101	4825	13.6995
T167C	0.000454177	3.93499e-05	16.8675	0.944177	73.5239	0.769708	56.6564	1.21816	3448.08		T167C	3992	17.1343	2399	21.1755	4167	25.6539	3208	34.6322	4754	46.3189	5608	60.592	2688	66.369	2341	69.2012	2619	73.8068	2544	72.6808	3534	71.6752	3523	71.5867	2576	17.3913
T167G	0.000485991	4.94207e-05	13.6881	1.02533	71.4308	1.01872	57.7428	1.44537	1181.83		T167G	1517	14.766	916	15.6114	1619	22.9154	1249	30.024	1688	42.9502	1777	58.5819	918	64.3791	709	64.598	877	69.6693	764	70.288	1075	69.9535	1073	70.4567	944	16.4195
T168A	0.000390369	2.12987e-05	19.0629	0.632478	78.5576	0.479945	59.4947	0.793962	5248.33		T168A	6854	19.4923	3927	22.7655	6932	30.1356	4970	40.1207	7113	53.1	8144	65.7417	4044	71.365	3428	75.2334	3835	77.7053	3472	77.5922	5207	76.2051	5054	78.5912	4199	22.6721
T168C	0.000383722	3.22803e-05	18.9846	0.986563	77.9816	0.728479	58.9971	1.22637	3314.17		T168C	4049	18.8689	2362	24.7248	4415	30.0113	3031	38.997	4497	52.2571	5281	66.2753	2549	73.0875	2258	73.2507	2503	74.9501	2315	77.6242	3234	77.18	3276	77.0452	2496	21.3542
T168G	0.000379839	4.47941e-05	13.011	1.21822	72.3097	1.13683	59.2986	1.66627	1667.17		T168G	2207	13.865	1280	14.9219	2223	26.0459	1575	32.127	2250	48.2222	2617	59.4192	1302	68.3564	1175	66.383	1165	72.9614	1134	69.5767	1496	69.7193	1582	72.5032	1362	14.3906
T169A	0.000283599	1.49459e-05	14.586	0.625808	76.8376	0.474844	62.2516	0.785565	9506.67		T169A	11972	15.0267	7014	19.6322	12536	29.5708	8894	41.2413	12821	55.5027	15213	66.6798	7209	71.1333	6447	73.0727	7007	75.6957	6432	77.7985	9243	75.5382	9292	75.6995	7368	19.3404
T169C	0.000381406	2.73274e-05	21.6111	0.855286	79.4695	0.589576	57.8584	1.0388	3546.58		T169C	4361	22.3343	2591	26.0131	4548	31.4644	3235	41.9165	4907	55.7163	5590	67.7639	2724	72.2834	2460	75.0407	2636	78.0349	2434	80.074	3580	77.3464	3493	79.1011	2753	26.2623
T169G	0.000242096	1.7686e-05	14.2996	0.96488	80.0163	0.614072	65.7167	1.14371	1888.67		T169G	2124	14.6422	1287	21.9114	2268	30.3792	1638	46.6422	2443	60.4175	2911	69.6668	1607	75.9801	1360	76.3971	1555	78.4566	1438	82.128	2014	78.2522	2019	78.7023	1276	18.2602
T170A	0.000273664	2.6863e-05	17.8199	1.21418	77.3543	0.810305	59.5345	1.45974	6951.75		T170A	8122	18.8993	4753	21.8599	8704	32.0887	6571	44.0877	9659	56.5483	11464	68.859	5730	73.5602	4699	73.7817	5275	78.3507	4744	75.7799	6921	75.0036	6779	76.0142	5142	18.9032
T170C	0.000454382	3.90046e-05	20.6169	0.911236	77.3168	0.782418	56.6999	1.20105	3430.33		T170C	4994	20.805	2739	24.9361	4910	29.6741	3514	38.2186	4615	49.6641	5326	64.7202	2528	70.4905	1860	73.2258	2394	76.4411	2174	76.081	3065	75.106	3045	76.3218	2639	22.357
T170G	0.000367452	3.32255e-05	13.1637	1.1291	79.1602	0.864653	65.9965	1.42214	1450.58		T170G	1630	12.9448	964	18.7759	1741	27.2832	1302	35.6375	1969	50.7364	2378	66.6947	1201	72.856	982	74.2363	1180	77.4576	1066	79.4559	1446	76.2102	1548	78.876	989	15.5713
T171A	0.000178755	2.00673e-05	38.9515	1.73199	89.7468	0.491325	50.7953	1.80033	4226.42		T171A	3252	39.0836	1956	45.9611	4139	56.4629	3432	66.3462	5816	76.2036	7454	84.1964	3795	88.8538	3368	86.1342	3817	89.573	3717	89.8036	5009	88.4408	4962	89.4196	2062	39.6702
T171C	0.00258461	0.000203598	2.37642	0.106889	28.068	0.799576	25.6916	0.806689	36498		T171C	96266	2.40687	52221	2.57942	82497	3.3383	51624	4.20541	52273	6.91944	40229	11.0269	14365	16.3453	10318	18.7827	9773	22.4701	8232	25.0729	10365	26.165	9813	30.0825	47469	3.07358
T171G	0.000744394	0.000110842	40.4179	0.869196	74.6045	0.987859	34.1866	1.31581	4054.58		T171G	7229	41.1399	4710	39.4055	7377	44.5167	4743	49.378	5798	54.6913	5379	62.9113	2597	64.4205	1968	69.4106	2061	71.9068	1840	72.1739	2439	74.6617	2514	76.7701	4324	39.8705
T172A	0.000236489	5.15834e-05	72.8383	1.52202	93.9127	0.388618	21.0744	1.57085	2050.75		T172A	1399	73.3381	866	74.7113	1812	79.0839	1451	81.8746	2683	86.4331	3742	91.4217	1899	93.5229	1645	91.9149	1995	94.2857	1857	93.8611	2603	92.8544	2657	93.4513	929	68.4607
T172C	0.00148118	0.000334092	23.2842	0.784494	50.6124	1.59913	27.3281	1.78119	19552.8		T172C	38490	21.8213	21044	24.5248	36632	25.2593	25319	28.2871	30281	31.8318	28334	35.2933	10848	39.2054	8897	42.2727	8891	45.5067	7782	48.0725	9086	50.2641	9029	55.2442	21216	27.088
T172G	0.000250792	5.11363e-05	40.0528	2.56107	85.2888	0.969307	45.236	2.73836	1082		T172G	892	40.1345	572	45.4545	1175	52.5957	865	59.1908	1473	68.7033	1946	80.5242	912	82.6754	866	79.7921	1000	86.4	888	85.5856	1178	82.5976	1217	84.7165	581	37.6936
T173A	0.000124649	3.4204e-05	94.7786	0.472069	99.101	0.0716211	4.32238	0.477472	3419.75		T173A	1806	95.072	1134	95.1499	2686	96.5376	2352	97.1514	4396	98.4531	6402	98.8285	3369	98.9018	3029	99.0096	3502	98.8292	3336	98.741	4444	99.0774	4581	99.2578	1150	95.2174	135459
T173C	0.000478276	8.39372e-05	44.0296	1.17387	71.2164	0.685702	27.1869	1.35947	4379.83		T173C	3898	41.765	2246	46.4381	4588	50.6539	3813	52.9504	6169	58.5508	7993	63.1553	3930	66.743	3489	67.5265	3926	69.893	3529	69.5381	4300	72.0698	4677	72.7176	2584	45.0464
T173G	0.00013511	4.50536e-05	67.0656	2.93868	92.58	0.610358	25.5144	3.0014	388.667		T173G	241	66.39	155	72.2581	311	78.7781	298	81.5436	484	85.9504	692	90.896	373	93.2976	359	89.6936	368	93.75	377	91.5119	485	90.5155	521	93.0902	142	66.1972
A-1C;T1A	0.000729385	0.00052159	5.13402	4.0099	58.7112	8.89856	53.5772	9.76031	4.91667		A-1C;T1A	12	0	2	0	10	10	6	16.6667	10	20	3	66.6667	4	25	4	50	2	50	3	66.6667	1	0	2	100	2	0	#REF!
A-1C;T1C	0.00145203	0.00118158	33.0891	9.48017	88.8563	7.63508	55.7672	12.1724	3		A-1C;T1C	3	33.3333	0	NA	4	25	5	60	4	25	8	50	2	100	3	100	1	100	3	100	2	100	1	100	1	0	#REF!
A-1C;T1G	NA	NA	NA	NA	NA	NA	NA	NA	0.25		A-1C;T1G	0	NA	0	NA	1	0	0	NA	1	0	1	0	0	NA	0	NA	0	NA	0	NA	0	NA	0	NA	0	NA
A-1C;C2A	0.00052738	0.0076278	47.7466	22.3031	39.2699	19.113	-8.47667	29.3723	2.25		A-1C;C2A	6	16.6667	0	NA	3	100	0	NA	6	33.3333	1	0	3	0	1	100	1	100	1	0	1	100	4	25	3	0
A-1C;C2G	NA	NA	NA	NA	NA	NA	NA	NA	0.0833333		A-1C;C2G	0	NA	0	NA	0	NA	0	NA	1	100	0	NA	0	NA	0	NA	0	NA	0	NA	0	NA	0	NA	1	0
A-1C;C2T	0.00819146	0.0138075	16.5635	8.39127	96.4515	53.3998	79.888	54.0551	1.41667		A-1C;C2T	3	0	2	0	1	0	2	0	2	50	3	0	1	100	1	0	1	100	1	100	0	NA	0	NA	0	NA
A-1C;T3A	0.00228501	0.00179511	15.0332	6.1861	74.0373	8.98243	59.0042	10.9065	2.5		A-1C;T3A	3	0	4	25	3	0	1	0	0	NA	2	0	1	100	7	57.1429	1	100	1	100	1	100	6	66.6667	3	0
A-1C;T3C	3e-07	0.226997	100	5.38938e+07	28.5326	17.4713	-71.4674	5.38938e+07	0.916667		A-1C;T3C	0	NA	0	NA	1	0	0	NA	0	NA	1	0	3	0	1	100	2	0	2	0	1	100	0	NA	1	0
A-1C;T3G	0.0490905	0.317749	20.9993	5.44965	100	167.068	79.0007	167.157	0.5		A-1C;T3G	1	0	0	NA	0	NA	1	0	1	0	2	0	0	NA	0	NA	0	NA	0	NA	0	NA	1	100	0	NA
A-1C;A4C	2.21014e-05	0.00743623	100	17279.9	43.8393	15.2691	-56.1607	17279.9	0.833333		A-1C;A4C	0	NA	0	NA	0	NA	2	50	2	50	0	NA	1	0	1	0	1	0	1	0	2	100	0	NA	0	NA
A-1C;A4G	2.3188e-05	0.00020254	0	307.053	55.4423	9.55294	55.4423	307.201	1.91667		A-1C;A4G	0	NA	1	0	5	40	3	66.6667	3	66.6667	2	50	2	100	1	0	2	50	1	100	1	100	2	0	1	0
A-1C;A4T	3e-07	6.56158e-05	73.2717	39.8021	58.6952	10.5638	-14.5765	41.1801	2.5		A-1C;A4T	1	100	4	25	3	0	4	75	1	100	4	100	1	0	1	100	4	75	4	50	1	100	2	50	2	50
A-1C;G5A	3e-07	4.51553e-05	25.1306	34.7663	48.9488	10.3214	23.8183	36.2661	1.91667		A-1C;G5A	1	0	2	50	2	100	3	66.6667	1	100	7	71.4286	1	100	0	NA	2	0	1	0	1	0	2	0	2	50
A-1C;G5C	NA	NA	NA	NA	NA	NA	NA	NA	0		A-1C;G5C	0	NA	0	NA	0	NA	0	NA	0	NA	0	NA	0	NA	0	NA	0	NA	0	NA	0	NA	0	NA	1	100
A-1C;G5T	0.000141092	0.000384108	63.3947	25.1961	16.4832	21.373	-46.9115	33.0401	1.41667		A-1C;G5T	3	33.3333	2	100	4	50	0	NA	4	0	1	0	2	50	0	NA	0	NA	0	NA	0	NA	1	0	0	NA
A-1C;T6A	0.086876	0.467986	32.2432	10.1772	100	198.193	67.7568	198.454	1.66667		A-1C;T6A	4	50	0	NA	4	0	1	100	2	50	2	50	0	NA	1	0	2	50	3	33.3333	0	NA	1	100	3	66.6667
A-1C;T6C	0.000126136	0.000150028	20.4681	11.492	70.7043	8.36804	50.2362	14.2158	2.5		A-1C;T6C	5	20	2	0	2	50	1	100	7	57.1429	4	50	5	80	2	50	0	NA	0	NA	2	100	0	NA	2	0
A-1C;T7A	7.0727e-05	7.57688e-05	15.8578	14.7108	69.4555	6.85655	53.5977	16.2302	3.08333		A-1C;T7A	2	0	4	25	6	50	1	0	7	71.4286	3	100	1	100	3	66.6667	2	50	0	NA	4	75	4	50	4	0
A-1C;T7C	0.0315969	0.0390077	33.3772	5.33794	100	26.4638	66.6228	26.9968	5		A-1C;T7C	5	40	0	NA	7	14.2857	4	25	11	54.5455	12	33.3333	3	33.3333	5	40	5	40	1	100	3	66.6667	4	100	0	NA
A-1C;G8A	0.00428853	0.0110887	73.2358	24.9118	20.6708	25.1556	-52.565	35.4034	1.75		A-1C;G8A	4	75	0	NA	0	NA	0	NA	0	NA	3	66.6667	3	66.6667	2	50	0	NA	4	0	5	60	0	NA	1	0
A-1C;G8C	NA	NA	NA	NA	NA	NA	NA	NA	0.0833333		A-1C;G8C	0	NA	1	100	0	NA	0	NA	0	NA	0	NA	0	NA	0	NA	0	NA	0	NA	0	NA	0	NA	0	NA
A-1C;G8T	3e-07	0.0564955	100	8.25987e+06	55.6936	20.2837	-44.3064	8.25987e+06	0.75		A-1C;G8T	0	NA	2	50	0	NA	0	NA	1	0	2	50	1	100	2	100	1	0	0	NA	0	NA	0	NA	0	NA
A-1C;A9C	NA	NA	NA	NA	NA	NA	NA	NA	0.0833333		A-1C;A9C	0	NA	0	NA	0	NA	0	NA	0	NA	0	NA	0	NA	0	NA	1	0	0	NA	0	NA	0	NA	0	NA
A-1C;A9G	0.0162226	0.0293828	26.3743	8.42257	93.495	41.2937	67.1208	42.1439	1.91667		A-1C;A9G	2	50	3	0	2	0	2	50	5	40	1	0	0	NA	0	NA	1	0	6	83.3333	0	NA	1	100	2	0
A-1C;A9T	1.81512e-05	8.02905e-05	24.4971	18.0156	46.3441	7.85996	21.8469	19.6555	3.91667		A-1C;A9T	5	20	1	0	8	50	4	75	6	16.6667	4	25	4	50	0	NA	1	0	2	50	5	80	7	42.8571	5	20
A-1C;A10C	0.00107819	0.00163268	36.168	12.3415	85.0064	14.2511	48.8384	18.8522	0.916667		A-1C;A10C	1	0	1	100	1	0	1	0	2	50	1	100	1	100	0	NA	1	100	2	100	0	NA	0	NA	0	NA
A-1C;A10G	3.68509e-05	0.000218478	0	173.315	59.7338	13.4136	59.7338	173.833	1		A-1C;A10G	0	NA	2	0	3	66.6667	0	NA	3	33.3333	0	NA	1	100	0	NA	1	0	0	NA	1	100	1	100	0	NA
A-1C;A10T	0.0184481	0.0426389	51.3504	9.24787	96.924	31.8214	45.5736	33.138	4.33333		A-1C;A10T	6	66.6667	5	20	1	100	7	71.4286	4	75	7	28.5714	1	100	8	37.5	2	100	2	100	5	100	4	75	5	40
A-1C;G11A	0.000166029	0.000337564	25.0905	19.2431	67.5396	9.38281	42.4491	21.4087	1.91667		A-1C;G11A	3	33.3333	2	0	3	33.3333	1	100	2	50	0	NA	2	50	2	50	2	100	3	100	2	50	1	0	1	0
A-1C;G11C	0.000991753	NA	0	NA	88.245	NA	88.245	NA	0.333333		A-1C;G11C	0	NA	0	NA	0	NA	0	NA	1	0	0	NA	0	NA	2	100	0	NA	1	100	0	NA	0	NA	0	NA
A-1C;G11T	0.00040029	0.00117409	26.5336	18.1758	52.9344	11.834	26.4008	21.6887	1.08333		A-1C;G11T	1	0	0	NA	3	33.3333	1	0	2	50	1	0	1	100	0	NA	1	100	0	NA	1	0	2	50	0	NA
A-1C;A12C	1.00473e-05	0.00702164	100	22517	64.1099	19.8839	-35.8901	22517	0.416667		A-1C;A12C	0	NA	0	NA	1	100	0	NA	1	0	0	NA	1	100	0	NA	0	NA	0	NA	1	100	1	100	0	NA
A-1C;A12G	3e-07	8.26587e-05	49.8133	26.3758	39.4327	8.18962	-10.3806	27.618	1.83333		A-1C;A12G	2	50	1	0	0	NA	1	0	2	50	7	14.2857	3	33.3333	0	NA	2	50	1	100	1	100	2	50	9	0
A-1C;A12T	0.00225551	0.00484057	17.8168	18.2019	66.1427	18.3837	48.3259	25.8703	1.83333		A-1C;A12T	1	0	0	NA	1	0	3	0	4	25	5	60	2	0	0	NA	0	NA	3	100	2	50	1	0	2	50
A-1C;G13A	0.00122733	0.0099641	45.7849	23.335	59.857	16.1227	14.0721	28.3631	3.75		A-1C;G13A	2	50	3	33.3333	7	57.1429	2	50	5	60	6	16.6667	2	50	2	100	5	100	4	75	4	25	3	0	1	100
A-1C;G13C	0.0189061	NA	19.1821	NA	100	NA	80.8179	NA	0.333333		A-1C;G13C	0	NA	0	NA	1	0	2	0	0	NA	1	0	0	NA	0	NA	0	NA	0	NA	0	NA	0	NA	0	NA
A-1C;G13T	0.000735598	0.00179295	34.3659	24.1329	72.1164	13.3969	37.7505	27.6021	1.83333		A-1C;G13T	0	NA	0	NA	4	25	1	100	1	0	6	66.6667	3	66.6667	1	100	4	50	0	NA	0	NA	2	100	2	0
A-1C;T14A	0.0456742	0.136524	24.8749	11.1446	93.1409	86.8704	68.266	87.5824	1.83333		A-1C;T14A	0	NA	0	NA	3	0	1	100	2	0	4	50	3	33.3333	3	0	1	0	1	100	1	100	3	66.6667	2	50
A-1C;T14C	0.00969835	0.0292523	16.0499	10.4067	47.0104	23.178	30.9605	25.4071	2.25		A-1C;T14C	5	20	0	NA	1	0	1	0	3	0	6	16.6667	4	0	0	NA	3	33.3333	1	100	1	100	2	0	0	NA
A-1C;A15G	0.000440224	0.00116662	20.3847	27.0837	65.8196	20.2567	45.4349	33.821	1.58333		A-1C;A15G	2	0	0	NA	2	50	3	33.3333	2	0	3	33.3333	4	100	0	NA	1	0	0	NA	1	0	1	100	1	0
A-1C;A15T	3.02174e-05	0.000246903	39.8266	17.9163	50.3001	8.15444	10.4735	19.6848	2.25		A-1C;A15T	5	40	1	0	1	100	2	50	2	50	5	40	5	60	2	50	0	NA	2	0	1	100	1	100	2	0
A-1C;T16A	2.67627e-05	5.53781e-05	12.391	19.0917	62.7327	9.79002	50.3417	21.4555	2.08333		A-1C;T16A	3	0	3	33.3333	2	50	1	100	1	100	2	0	3	66.6667	0	NA	2	100	1	0	4	50	3	100	1	0
A-1C;T16C	3e-07	0.000385582	36.8724	31.7118	29.0795	18.8231	-7.7929	36.8775	0.75		A-1C;T16C	3	33.3333	0	NA	2	0	0	NA	0	NA	0	NA	0	NA	0	NA	0	NA	1	0	2	0	1	100	1	100
A-1C;A17C	0.000105587	NA	100	NA	37.8791	NA	-62.1209	NA	0.416667		A-1C;A17C	0	NA	0	NA	0	NA	0	NA	2	50	0	NA	0	NA	0	NA	2	0	0	NA	0	NA	1	100	0	NA
A-1C;A17G	0.00996743	0.0222921	38.3533	13.3663	92.3888	29.5133	54.0355	32.399	1.16667		A-1C;A17G	2	50	0	NA	1	100	0	NA	2	0	2	50	1	0	0	NA	1	100	3	100	1	100	1	100	0	NA
A-1C;A17T	4.45296e-06	4.85445e-05	21.3844	15.2384	39.2455	10.0592	17.8612	18.2592	1.75		A-1C;A17T	6	16.6667	4	25	1	100	1	0	3	33.3333	2	50	0	NA	0	NA	1	0	0	NA	2	0	1	100	2	50
A-1C;A18C	0.000679543	0.000925842	3.13919	24.1832	100	34.7183	96.8608	42.3106	0.75		A-1C;A18C	0	NA	0	NA	1	0	2	0	4	50	1	100	1	100	0	NA	0	NA	0	NA	0	NA	0	NA	0	NA
A-1C;A18G	0.0870796	0.66492	39.1431	13.9195	100	260.101	60.8569	260.473	2.41667		A-1C;A18G	6	16.6667	0	NA	3	0	4	100	1	0	1	0	1	0	1	0	0	NA	5	20	5	80	2	100	1	100
A-1C;A18T	0.00346746	0.00494153	34.4474	8.5302	77.1816	11.432	42.7342	14.2637	7.83333		A-1C;A18T	8	37.5	2	100	11	27.2727	6	16.6667	17	29.4118	10	50	8	50	4	75	6	83.3333	4	75	7	85.7143	11	63.6364	6	66.6667
A-1C;G19A	3e-07	3.03225e-05	10.0322	16.6036	46.1788	10.5841	36.1466	19.6902	2		A-1C;G19A	4	0	1	100	0	NA	3	33.3333	0	NA	2	50	5	80	2	0	4	50	0	NA	2	0	1	100	0	NA
A-1C;G19T	0.00430419	0.0101607	16.6908	11.6901	53.4685	20.6708	36.7777	23.7474	3.5		A-1C;G19T	2	0	0	NA	4	50	4	0	11	27.2727	5	0	1	100	4	25	4	75	2	50	1	0	4	50	1	0
A-1C;A20C	0.00263808	0.0182534	42.6002	21.0503	64.2251	32.853	21.6249	39.0184	0.833333		A-1C;A20C	2	0	0	NA	2	100	0	NA	1	0	1	0	1	100	0	NA	0	NA	1	100	0	NA	2	50	0	NA
A-1C;A20G	3e-07	1.53961e-05	83.3113	15.6379	38.3044	8.84493	-45.0069	17.966	1		A-1C;A20G	2	100	1	0	2	50	0	NA	0	NA	3	33.3333	0	NA	1	0	1	0	1	100	0	NA	1	0	1	0
A-1C;A20T	0.000106352	0.000371765	27.3676	21.3256	57.7361	12.7028	30.3685	24.8222	3.91667		A-1C;A20T	11	27.2727	0	NA	5	20	1	100	6	83.3333	7	14.2857	3	100	5	40	1	100	2	100	1	0	5	40	3	33.3333
A-1C;G21A	3e-07	0.010634	0.0234156	1.27953e+06	36.23	10.6499	36.2066	1.27953e+06	1.58333		A-1C;G21A	0	NA	0	NA	2	50	0	NA	1	0	1	100	5	40	3	33.3333	1	100	1	100	4	0	1	0	0	NA
A-1C;G21T	3e-07	7.29159e-05	37.4894	34.3819	22.0655	7.90253	-15.4239	35.2784	3.5		A-1C;G21T	3	33.3333	1	0	3	0	0	NA	4	50	9	22.2222	4	0	4	50	2	0	4	75	1	100	7	0	3	66.6667
A-1C;A22G	7.39858e-05	0.000484558	21.2034	13.2937	35.8594	9.38905	14.656	16.275	1.66667		A-1C;A22G	6	16.6667	0	NA	1	0	0	NA	2	50	4	25	3	33.3333	1	0	0	NA	2	0	0	NA	1	100	3	0
A-1C;A22T	0.00255982	0.00612425	24.7444	13.6388	64.7605	19.5883	40.0162	23.8688	1.75		A-1C;A22T	3	33.3333	1	0	2	50	1	0	3	0	0	NA	3	33.3333	1	100	2	100	0	NA	0	NA	5	40	1	100
A-1C;G23A	6.56714e-05	0.000283157	21.9567	37.6318	60.1856	12.4741	38.2288	39.6454	1.16667		A-1C;G23A	1	0	0	NA	1	0	0	NA	1	100	2	100	2	100	1	0	2	100	1	0	1	100	2	0	1	100
A-1C;G23C	0.00215688	NA	0	NA	81.7069	NA	81.7069	NA	0.25		A-1C;G23C	0	NA	0	NA	0	NA	0	NA	0	NA	1	0	0	NA	0	NA	1	100	0	NA	1	100	0	NA	0	NA
A-1C;G23T	0.0392613	0.1616	47.4817	11.4551	100	75.211	52.5183	76.0783	2.16667		A-1C;G23T	1	0	2	100	3	33.3333	0	NA	3	33.3333	6	66.6667	2	0	0	NA	1	100	0	NA	5	80	3	100	2	50
A-1C;A24C	0.0176096	0.948653	56.9807	37.1901	100	1333.75	43.0193	1334.27	0.333333		A-1C;A24C	1	100	0	NA	0	NA	0	NA	1	0	1	100	0	NA	0	NA	1	100	0	NA	0	NA	0	NA	0	NA
A-1C;A24G	0.00214268	0.00408268	39.3197	15.5452	80.5462	13.5971	41.2265	20.6527	2.66667		A-1C;A24G	0	NA	1	0	4	75	0	NA	10	30	2	50	3	66.6667	3	100	0	NA	4	75	3	66.6667	2	100	2	50
A-1C;A24T	3e-07	2.52876e-05	10.7157	10.8376	41.8727	7.97081	31.157	13.4531	5.66667		A-1C;A24T	13	7.69231	5	60	11	27.2727	2	0	7	14.2857	7	42.8571	7	71.4286	5	60	4	50	2	100	1	0	4	25	1	0
A-1C;T25A	3e-07	2.09805e-05	25.012	14.6741	59.6935	8.52878	34.6816	16.9726	1.83333		A-1C;T25A	5	20	1	100	3	33.3333	1	100	0	NA	2	50	0	NA	0	NA	2	50	0	NA	2	100	6	50	3	33.3333
A-1C;T25C	3e-07	4.1408e-05	64.0721	24.651	37.4618	9.33704	-26.6103	26.3601	3.25		A-1C;T25C	6	66.6667	1	0	5	40	6	66.6667	2	0	5	40	4	25	2	100	4	0	1	0	3	66.6667	0	NA	0	NA
A-1C;C26A	0.00136923	0.00192719	25.1875	10.5868	72.7564	9.80065	47.5689	14.4268	0.666667		A-1C;C26A	1	0	0	NA	0	NA	1	0	2	50	0	NA	0	NA	2	50	1	100	0	NA	0	NA	1	100	0	NA
A-1C;C26G	0.000354425	0.000691491	79.0983	26.5956	20.6946	26.893	-58.4037	37.8227	0.333333		A-1C;C26G	1	100	0	NA	0	NA	1	100	1	0	0	NA	0	NA	0	NA	0	NA	0	NA	0	NA	1	0	0	NA
A-1C;C26T	3e-07	5.66153e-05	37.5117	9.84903	78.9312	7.47551	41.4196	12.3647	0.75		A-1C;C26T	3	33.3333	0	NA	0	NA	3	100	1	100	0	NA	0	NA	0	NA	0	NA	0	NA	1	100	1	100	1	0
A-1C;C27A	3.35002e-05	0.000165088	12.5869	20.7111	41.8392	9.62766	29.2524	22.8394	3.08333		A-1C;C27A	3	0	0	NA	3	33.3333	3	33.3333	5	20	5	60	4	50	1	100	1	100	4	0	1	0	7	71.4286	3	66.6667
A-1C;C27G	0.00300694	NA	22.5494	NA	100	NA	77.4506	NA	0.25		A-1C;C27G	1	0	0	NA	0	NA	1	0	0	NA	0	NA	0	NA	1	100	0	NA	0	NA	0	NA	0	NA	2	50
A-1C;C27T	1.76721e-05	8.62394e-05	30.2665	19.4359	54.622	9.45414	24.3555	21.6133	1.75		A-1C;C27T	4	25	2	50	0	NA	1	0	5	60	2	100	2	50	3	33.3333	0	NA	1	0	1	100	0	NA	1	100
A-1C;T28A	0.00152679	0.00125339	12.2104	6.88577	81.6681	10.0556	69.4577	12.1872	2.25		A-1C;T28A	5	0	2	0	3	0	2	50	2	50	4	25	1	100	1	0	2	100	2	100	1	100	2	100	0	NA
A-1C;T28C	0.0651709	0.43078	55.1626	9.74523	100	132.385	44.8374	132.743	2		A-1C;T28C	6	66.6667	1	100	2	0	1	100	3	33.3333	2	100	3	33.3333	1	100	0	NA	3	66.6667	0	NA	2	100	2	50
A-1C;A29C	NA	NA	NA	NA	NA	NA	NA	NA	0.25		A-1C;A29C	0	NA	0	NA	0	NA	0	NA	0	NA	0	NA	2	0	0	NA	1	100	0	NA	0	NA	0	NA	0	NA
A-1C;A29G	0.00813336	0.0273934	31.7103	10.5869	70.2626	25.8945	38.5523	27.9751	1.66667		A-1C;A29G	1	100	1	0	3	33.3333	2	0	2	0	6	50	1	0	0	NA	0	NA	1	100	1	100	2	50	3	33.3333
A-1C;A29T	0.000542928	0.0101847	77.2761	20.2275	70.55	15.0906	-6.72609	25.2364	2.5		A-1C;A29T	5	40	0	NA	6	100	1	0	0	NA	5	60	3	66.6667	2	100	2	100	1	100	3	33.3333	2	100	0	NA
A-1C;T30A	1.1365e-05	3.10235e-05	43.5444	22.8048	82.4201	6.65025	38.8758	23.7547	7.33333		A-1C;T30A	9	44.4444	6	33.3333	7	100	8	75	7	100	11	63.6364	12	91.6667	5	60	4	100	4	50	7	71.4286	8	62.5	5	0
A-1C;T30C	0.00281379	0.00888111	29.4482	13.2422	60.542	21.6883	31.0938	25.4114	2.5		A-1C;T30C	4	50	2	0	3	33.3333	0	NA	5	20	6	33.3333	0	NA	6	66.6667	1	0	2	100	1	0	0	NA	2	50
A-1C;T30G	0.000626682	0.00622951	58.3745	26.609	45.0863	19.3885	-13.2882	32.9234	0.666667		A-1C;T30G	2	50	0	NA	0	NA	1	100	0	NA	1	0	0	NA	1	100	1	0	0	NA	0	NA	2	50	0	NA
A-1C;T31A	3e-07	0.000128254	50.2721	27.1149	59.7738	11.9114	9.50176	29.6159	2.16667		A-1C;T31A	6	50	1	100	1	0	7	71.4286	1	100	0	NA	4	75	0	NA	1	0	0	NA	3	100	2	0	2	0
A-1C;T31C	0.00235204	0.0180211	34.7173	19.6311	48.9976	24.0121	14.2802	31.0155	2.08333		A-1C;T31C	4	50	5	20	1	0	0	NA	2	100	4	0	2	50	2	100	1	100	1	0	2	0	1	100	0	NA
A-1C;T31G	3e-07	0.000413561	30.0356	21.2793	47.4417	12.7162	17.4061	24.7893	1.33333		A-1C;T31G	4	25	0	NA	0	NA	2	50	3	66.6667	2	0	1	100	2	50	1	100	0	NA	0	NA	1	0	1	0
A-1C;T32A	3e-07	1.33352e-05	6.25371	7.50474	59.3643	6.25283	53.1106	9.76827	3.58333		A-1C;T32A	7	0	1	100	5	60	4	25	4	50	6	66.6667	1	0	2	100	1	100	1	100	9	66.6667	2	50	2	50
A-1C;T32C	0.0123923	0.0333201	47.3787	8.56734	79.9804	23.0822	32.6017	24.6208	5.33333		A-1C;T32C	9	77.7778	5	40	7	14.2857	1	100	7	42.8571	6	50	4	50	10	60	1	100	4	50	3	100	7	71.4286	0	NA
A-1C;T32G	0.107176	0.983961	48.4745	6.93339	100	251.876	51.5255	251.971	1.41667		A-1C;T32G	3	66.6667	1	0	3	66.6667	2	50	5	40	0	NA	0	NA	0	NA	2	50	0	NA	0	NA	1	100	0	NA
A-1C;T33A	0.000295885	0.000563603	23.7855	12.6921	59.8449	10.697	36.0593	16.5987	4.08333		A-1C;T33A	11	27.2727	4	25	2	0	2	0	7	57.1429	6	66.6667	3	100	5	40	4	50	1	100	3	33.3333	1	0	5	0
A-1C;T33C	8.80457e-06	0.00491701	100	21374.2	58.1076	20.8102	-41.8924	21374.2	0.833333		A-1C;T33C	0	NA	0	NA	3	66.6667	1	100	1	0	0	NA	1	0	0	NA	0	NA	1	0	3	100	0	NA	0	NA
A-1C;T33G	4.80393e-05	0.0123963	0	13192.9	62.4539	26.2672	62.4539	13192.9	0.666667		A-1C;T33G	0	NA	0	NA	0	NA	4	50	0	NA	0	NA	1	100	1	100	1	100	1	0	0	NA	0	NA	0	NA
A-1C;A34C	0.00821297	0.0269841	21.9114	18.2735	100	123.109	78.0886	124.458	0.666667		A-1C;A34C	1	0	0	NA	0	NA	1	0	0	NA	2	50	2	0	1	100	1	100	0	NA	0	NA	0	NA	0	NA
A-1C;A34G	0.000133001	0.0240205	0	6037.87	41.5697	25.6463	41.5697	6037.93	0.5		A-1C;A34G	0	NA	0	NA	0	NA	0	NA	1	0	0	NA	1	100	0	NA	1	0	0	NA	2	0	1	100	3	0
A-1C;A34T	0.00107655	0.00143255	43.7139	8.52079	77.5704	7.51316	33.8566	11.3601	4.25		A-1C;A34T	6	50	3	33.3333	5	60	3	33.3333	9	44.4444	5	60	2	100	6	83.3333	3	100	2	50	6	66.6667	1	100	5	20
A-1C;A35C	3e-07	5.97883e-05	71.6844	30.4427	57.2374	10.0933	-14.447	32.0723	1.5		A-1C;A35C	1	100	3	33.3333	1	100	2	50	1	0	0	NA	1	100	3	33.3333	3	100	0	NA	2	50	1	0	0	NA
A-1C;A35G	0.0152166	0.0173032	26.6383	4.74632	76.8507	16.8948	50.2123	17.5489	2.83333		A-1C;A35G	7	14.2857	1	0	1	0	1	0	4	50	2	50	5	20	2	50	2	50	2	50	6	66.6667	1	100	2	50
A-1C;A35T	3e-07	2.63781e-05	12.5723	30.2775	59.4736	10.9465	46.9013	32.1955	4.91667		A-1C;A35T	3	0	3	66.6667	6	100	6	50	6	16.6667	12	50	1	0	7	85.7143	6	16.6667	1	100	5	40	3	100	1	0
A-1C;A36C	0.0369326	NA	37.4018	NA	100	NA	62.5982	NA	0.416667		A-1C;A36C	2	50	0	NA	0	NA	1	0	0	NA	0	NA	0	NA	0	NA	0	NA	0	NA	0	NA	2	100	1	100
A-1C;A36G	0.00040514	0.000684018	23.3178	11.0383	57.5805	10.2077	34.2627	15.0347	1.66667		A-1C;A36G	5	20	0	NA	2	0	3	66.6667	1	0	2	50	2	50	0	NA	2	50	0	NA	2	50	1	100	1	0
A-1C;A36T	0.000674493	0.00245926	47.8387	17.9687	25.4917	11.9546	-22.3469	21.5821	0.916667		A-1C;A36T	2	50	0	NA	1	0	1	100	1	0	1	0	0	NA	0	NA	2	50	0	NA	1	0	2	0	1	100
A-1C;G37A	0.000271559	0.000430159	27.1539	20.2209	74.9464	8.99079	47.7925	22.1296	1.58333		A-1C;G37A	1	0	0	NA	4	50	1	0	2	50	2	100	1	100	1	100	0	NA	2	100	3	33.3333	2	100	0	NA
A-1C;G37C	0.00933303	NA	100	NA	11.4402	NA	-88.5598	NA	0.333333		A-1C;G37C	0	NA	0	NA	0	NA	0	NA	1	100	0	NA	2	100	0	NA	0	NA	0	NA	1	0	0	NA	0	NA
A-1C;G37T	4.55569e-05	0.000195501	17.3973	45.1223	50.4596	14.9262	33.0623	47.527	2		A-1C;G37T	1	0	2	0	7	42.8571	0	NA	2	100	2	0	3	100	2	0	0	NA	0	NA	2	0	3	66.6667	3	66.6667
A-1C;G38A	0.000878911	0.00558059	23.5416	17.8781	39.6583	15.9315	16.1167	23.9466	2.25		A-1C;G38A	1	0	2	0	4	75	5	0	2	50	4	50	0	NA	2	50	2	0	1	100	1	0	3	33.3333	0	NA
A-1C;G38C	NA	NA	NA	NA	NA	NA	NA	NA	0.0833333		A-1C;G38C	0	NA	0	NA	0	NA	0	NA	0	NA	1	0	0	NA	0	NA	0	NA	0	NA	0	NA	0	NA	0	NA
A-1C;G38T	0.0284213	0.0785435	21.9876	6.80693	55.7617	36.9112	33.7741	37.5336	2.08333		A-1C;G38T	6	16.6667	2	0	1	0	0	NA	1	0	2	50	1	0	7	14.2857	1	0	1	100	1	0	2	50	1	0
A-1C;A39C	NA	NA	NA	NA	NA	NA	NA	NA	0.0833333		A-1C;A39C	0	NA	0	NA	0	NA	0	NA	1	100	0	NA	0	NA	0	NA	0	NA	0	NA	0	NA	0	NA	0	NA
A-1C;A39G	6.72404e-05	0.000294572	0	104.808	64.8638	11.5601	64.8638	105.444	1.33333		A-1C;A39G	0	NA	2	0	2	50	0	NA	2	50	2	50	1	100	2	0	0	NA	1	100	1	100	3	100	3	0
A-1C;A39T	0.000129189	0.00034588	19.3108	19.888	57.0177	12.8158	37.7068	23.6597	1.91667		A-1C;A39T	2	0	3	33.3333	0	NA	2	0	1	100	5	80	4	75	2	50	3	33.3333	0	NA	0	NA	1	0	3	0
A-1C;C40A	0.000588897	0.0015371	16.1565	19.6545	56.2731	21.0516	40.1166	28.8005	1.25		A-1C;C40A	2	50	0	NA	4	0	1	0	3	33.3333	3	66.6667	0	NA	0	NA	0	NA	0	NA	1	0	1	100	2	50
A-1C;C40G	0.0433444	0.136128	23.5382	16.99	100	96.421	76.4618	97.9065	1.33333		A-1C;C40G	0	NA	0	NA	0	NA	2	50	1	0	4	0	2	50	1	0	2	100	2	0	0	NA	2	100	1	0
A-1C;C40T	0.0582316	0.1826	44.0578	8.44884	100	70.7838	55.9422	71.2863	4		A-1C;C40T	6	50	4	25	1	100	4	50	9	33.3333	5	60	4	75	1	0	1	0	8	37.5	0	NA	5	100	6	0
A-1C;G41A	1.60151e-05	4.45201e-05	65.7447	17.7277	32.6492	7.59504	-33.0955	19.2861	4.66667		A-1C;G41A	9	66.6667	5	60	8	25	2	0	3	33.3333	7	42.8571	3	0	4	25	4	50	5	80	3	33.3333	3	0	4	50
A-1C;G41C	NA	NA	NA	NA	NA	NA	NA	NA	0.0833333		A-1C;G41C	0	NA	0	NA	0	NA	0	NA	0	NA	0	NA	0	NA	0	NA	1	0	0	NA	0	NA	0	NA	1	0
A-1C;G41T	0.000615674	0.000707346	13.3711	13.7295	82.4752	17.3177	69.1042	22.0998	2.58333		A-1C;G41T	4	0	0	NA	9	22.2222	3	66.6667	6	16.6667	2	100	0	NA	0	NA	5	80	0	NA	2	100	0	NA	0	NA
A-1C;C42A	0.00155067	0.00562955	29.7683	5.58432	17.2249	7.03666	-12.5434	8.98327	0.916667		A-1C;C42A	1	0	0	NA	1	0	3	33.3333	1	0	0	NA	0	NA	2	0	2	0	1	0	0	NA	0	NA	0	NA
A-1C;C42G	0.000107542	NA	0	NA	28.1392	NA	28.1392	NA	0.416667		A-1C;C42G	0	NA	0	NA	3	0	0	NA	1	0	1	0	0	NA	0	NA	0	NA	0	NA	0	NA	0	NA	0	NA
A-1C;C42T	0.000188385	0.000177968	7.99196	8.30465	55.1415	6.54377	47.1495	10.573	3.16667		A-1C;C42T	4	0	2	0	3	0	3	33.3333	3	66.6667	6	50	3	33.3333	4	75	1	100	2	50	1	0	6	50	3	0
A-1C;C43A	0.00030523	0.00217971	30.1702	13.6271	21.8331	8.10942	-8.3371	15.8575	4.75		A-1C;C43A	5	20	4	50	7	14.2857	2	50	7	28.5714	11	9.09091	5	60	4	25	5	40	1	0	4	0	2	0	4	0
A-1C;C43G	0.000363068	0.00493352	45.4799	36.5262	0	246.162	-45.4799	248.857	0.416667		A-1C;C43G	1	0	1	100	1	0	0	NA	2	0	0	NA	0	NA	0	NA	0	NA	0	NA	0	NA	0	NA	0	NA
A-1C;C43T	2.85701e-05	7.61956e-05	7.11222	10.4096	33.9511	8.15977	26.8389	13.2266	3.25		A-1C;C43T	6	0	2	0	8	37.5	4	25	3	0	2	0	3	33.3333	3	0	1	100	1	100	2	50	4	50	4	0
A-1C;G44A	3e-07	2.65818e-05	18.7528	16.7471	55.0468	8.94389	36.294	18.9858	3.08333		A-1C;G44A	7	14.2857	1	0	3	100	3	66.6667	4	75	6	50	1	0	5	40	1	0	1	0	2	100	3	33.3333	2	0
A-1C;G44C	NA	NA	NA	NA	NA	NA	NA	NA	0.0833333		A-1C;G44C	0	NA	0	NA	0	NA	1	100	0	NA	0	NA	0	NA	0	NA	0	NA	0	NA	0	NA	0	NA	0	NA
A-1C;G44T	0.00027086	0.000947667	45.3242	21.315	20.0596	11.5253	-25.2646	24.2314	2.25		A-1C;G44T	3	33.3333	3	66.6667	4	25	5	20	1	100	2	0	3	0	0	NA	0	NA	4	0	1	100	1	0	0	NA
A-1C;A45C	0.00953788	0.0934136	49.0602	16.6669	0	206.451	-49.0602	207.123	0.833333		A-1C;A45C	2	50	0	NA	1	0	0	NA	2	50	3	66.6667	0	NA	0	NA	2	0	0	NA	0	NA	0	NA	1	0
A-1C;A45G	3e-07	0.000190191	50.1038	30.5095	55.3321	10.848	5.22821	32.3807	1.5		A-1C;A45G	2	50	1	100	2	50	4	25	4	75	0	NA	0	NA	0	NA	1	100	1	0	2	100	1	0	0	NA
A-1C;A45T	7.15153e-05	0.000346733	60.1	20.3829	41.9672	8.17129	-18.1328	21.9598	3.75		A-1C;A45T	5	60	0	NA	1	100	4	25	7	42.8571	7	42.8571	7	28.5714	1	0	3	66.6667	2	0	3	33.3333	5	80	10	70
A-1C;A46C	3e-07	0.000193979	83.3279	22.3483	46.0707	12.1879	-37.2572	25.4557	1.08333		A-1C;A46C	2	100	0	NA	0	NA	1	0	2	50	0	NA	1	100	3	66.6667	0	NA	2	0	1	100	1	0	0	NA
A-1C;A46G	0.00121142	0.00248524	59.7328	16.8099	13.2541	16.5294	-46.4787	23.5753	2.25		A-1C;A46G	3	66.6667	1	0	2	100	1	0	3	66.6667	2	0	6	50	2	0	5	0	0	NA	2	50	0	NA	2	0
A-1C;A46T	3e-07	2.43725e-05	8.36937	9.2011	36.3856	6.47242	28.0162	11.2496	3		A-1C;A46T	5	0	2	50	4	25	1	0	2	0	8	25	7	42.8571	0	NA	3	66.6667	3	66.6667	1	0	0	NA	6	16.6667
A-1C;G47A	0.289495	12.2366	48.4905	13.8126	0	1534.51	-48.4905	1534.57	2.75		A-1C;G47A	1	100	0	NA	7	42.8571	2	0	3	66.6667	2	100	7	28.5714	3	100	0	NA	2	0	2	50	4	0	0	NA
A-1C;G47C	NA	NA	NA	NA	NA	NA	NA	NA	0.166667		A-1C;G47C	0	NA	0	NA	0	NA	0	NA	0	NA	1	100	0	NA	0	NA	0	NA	1	0	0	NA	0	NA	0	NA
A-1C;G47T	4.24128e-05	8.73192e-05	46.6823	21.2433	11.0176	6.2955	-35.6647	22.1566	4.83333		A-1C;G47T	5	40	2	50	8	37.5	4	0	11	0	8	25	6	33.3333	3	33.3333	1	0	5	0	5	20	0	NA	1	0
A-1C;G48A	0.00157212	0.00575106	19.4745	17.9555	46.9029	23.0188	27.4284	29.1936	1.66667		A-1C;G48A	3	0	0	NA	1	100	2	50	5	0	3	33.3333	1	100	2	50	1	100	0	NA	1	0	1	0	3	0
A-1C;G48C	0.118921	NA	42.3097	NA	0	NA	-42.3097	NA	0.416667		A-1C;G48C	0	NA	0	NA	0	NA	0	NA	0	NA	0	NA	0	NA	0	NA	0	NA	1	0	2	50	2	0	0	NA
A-1C;G48T	0.000557098	0.000740939	18.1618	12.8337	78.8224	14.3492	60.6607	19.251	2.33333		A-1C;G48T	5	0	1	100	3	66.6667	3	0	1	100	7	57.1429	0	NA	0	NA	1	100	3	100	1	100	3	66.6667	3	33.3333
A-1C;G49A	1.03573e-05	0.00204269	49.9816	17.7415	50.6055	7.17858	0.623852	19.1388	3.08333		A-1C;G49A	6	50	2	50	4	50	2	50	2	50	5	60	4	75	3	33.3333	4	50	2	0	2	100	1	0	2	0
A-1C;G49C	0.0018694	0.0218913	28.2819	42.2015	48.7356	47.7762	20.4536	63.7458	0.583333		A-1C;G49C	0	NA	0	NA	0	NA	3	33.3333	1	0	1	0	0	NA	1	100	1	0	0	NA	0	NA	0	NA	0	NA
A-1C;G49T	0.00347503	0.00787077	49.6481	10.4265	77.8971	15.2462	28.249	18.4705	1.41667		A-1C;G49T	3	66.6667	0	NA	2	50	1	0	1	100	3	33.3333	1	100	4	75	0	NA	0	NA	1	100	1	100	0	NA
A-1C;A50C	0.000375723	0.0415273	56.7025	74.7855	59.0437	24.28	2.34124	78.6281	0.5		A-1C;A50C	0	NA	0	NA	1	100	1	0	0	NA	1	100	1	100	0	NA	1	100	0	NA	1	0	0	NA	0	NA
A-1C;A50G	0.000599776	0.000724873	24.8375	11.2576	75.3126	8.47711	50.475	14.0923	3.41667		A-1C;A50G	6	50	2	0	3	0	3	33.3333	1	100	7	71.4286	3	33.3333	1	100	1	100	2	100	6	83.3333	6	66.6667	3	0
A-1C;A50T	0.0288483	9.56633	40.6417	11.7436	41.0453	45.17	0.403624	46.6716	6.16667		A-1C;A50T	9	66.6667	3	33.3333	3	33.3333	8	37.5	5	20	9	44.4444	5	20	4	75	4	0	8	50	3	100	13	23.0769	4	50
A-1C;C51A	8.7066e-05	0.000262708	15.4804	19.9867	48.2158	12.8611	32.7354	23.7672	0.833333		A-1C;C51A	2	0	0	NA	1	0	1	0	1	100	1	100	1	0	1	0	1	100	0	NA	1	0	0	NA	1	100
A-1C;C51G	0.000930046	NA	100	NA	69.7188	NA	-30.2812	NA	0.333333		A-1C;C51G	0	NA	0	NA	0	NA	0	NA	0	NA	2	100	1	100	1	100	0	NA	0	NA	0	NA	0	NA	0	NA
A-1C;C51T	6.75924e-05	0.000114721	9.50344	17.9549	65.0128	13.9853	55.5093	22.7589	1.83333		A-1C;C51T	4	0	2	0	4	75	2	0	2	100	1	0	1	100	2	50	0	NA	1	0	3	100	0	NA	0	NA
A-1C;A52C	3.23339e-05	2.56162e-06	8.33189	0.155954	25.6882	0.30158	17.3563	0.339518	0.75		A-1C;A52C	5	0	2	0	0	NA	0	NA	1	0	1	0	0	NA	0	NA	0	NA	0	NA	0	NA	0	NA	1	0
A-1C;A52G	3e-07	0.000665783	30.165	47.5956	32.9518	12.4924	2.78677	49.2077	2.91667		A-1C;A52G	4	25	1	0	2	100	1	100	4	25	3	100	1	100	5	20	4	75	9	0	0	NA	1	100	3	0
A-1C;A52T	9.29498e-06	0.000124662	29.6316	28.0831	43.4062	8.2829	13.7746	29.2791	4.91667		A-1C;A52T	4	25	1	0	6	50	3	66.6667	6	50	7	57.1429	7	28.5714	1	100	4	75	4	75	5	0	11	54.5455	4	0
A-1C;A53C	NA	NA	NA	NA	NA	NA	NA	NA	0.166667		A-1C;A53C	1	100	0	NA	1	0	0	NA	0	NA	0	NA	0	NA	0	NA	0	NA	0	NA	0	NA	0	NA	0	NA
A-1C;A53G	5.65001e-05	0.000129077	25.2715	15.6722	50.4463	6.81822	25.1749	17.0911	3.41667		A-1C;A53G	4	25	2	0	7	57.1429	3	33.3333	2	50	8	50	2	50	5	60	1	100	2	0	3	66.6667	2	50	3	0
A-1C;A53T	0.000117052	0.000216612	79.8444	26.8577	33.2808	8.69581	-46.5636	28.2303	2.83333		A-1C;A53T	1	100	0	NA	4	75	2	50	2	0	3	66.6667	6	16.6667	3	66.6667	1	0	0	NA	3	66.6667	9	22.2222	4	50
A-1C;T54A	0.00145949	0.00963185	25.9001	12.8184	40.79	20.9289	14.8899	24.5424	3.41667		A-1C;T54A	8	62.5	4	50	5	0	4	0	7	42.8571	5	40	2	50	1	0	2	50	1	100	0	NA	2	0	4	25
A-1C;T54C	0.0293186	0.256528	35.3825	17.8465	100	222.33	64.6175	223.045	1.33333		A-1C;T54C	2	100	0	NA	4	0	0	NA	1	100	3	33.3333	3	33.3333	1	0	0	NA	0	NA	2	100	0	NA	0	NA
A-1C;T54G	0.00628652	0.00761401	18.465	12.4346	83.9657	17.1252	65.5007	21.1635	0.416667		A-1C;T54G	0	NA	0	NA	0	NA	1	0	1	0	0	NA	1	0	0	NA	1	100	0	NA	0	NA	1	100	0	NA
A-1C;C55A	0.000399558	0.000941572	17.6246	17.7272	49.1276	12.3605	31.503	21.611	3.75		A-1C;C55A	2	0	2	0	6	33.3333	1	0	8	12.5	8	75	4	50	0	NA	3	33.3333	1	100	4	75	6	16.6667	5	40
A-1C;C55G	10	NA	55.3655	NA	100	NA	44.6345	NA	0.416667		A-1C;C55G	2	100	0	NA	0	NA	2	0	0	NA	0	NA	0	NA	0	NA	0	NA	0	NA	1	100	0	NA	0	NA
A-1C;C55T	0.0597624	0.596641	49.8618	11.2818	100	312.784	50.1382	312.987	1.5		A-1C;C55T	1	100	1	100	1	100	1	100	5	20	1	0	3	66.6667	1	0	1	0	2	100	1	100	0	NA	0	NA
A-1C;T56A	0.000157761	0.000469321	21.2778	27.1128	55.9175	12.4847	34.6397	29.8492	3.5		A-1C;T56A	4	25	1	0	3	0	4	75	4	75	4	75	8	12.5	0	NA	2	100	5	60	5	80	2	50	2	0
A-1C;T56C	0.00550931	0.0233319	38.8497	10.6015	63.6169	23.3477	24.7672	25.6419	2.25		A-1C;T56C	4	50	1	100	2	50	5	20	2	0	7	42.8571	0	NA	1	100	0	NA	2	50	0	NA	3	66.6667	0	NA
A-1C;T56G	3e-07	0.000154153	74.9931	43.2265	47.2652	15.5231	-27.7279	45.9293	1.33333		A-1C;T56G	1	100	0	NA	2	50	0	NA	4	25	3	33.3333	2	0	0	NA	1	0	0	NA	3	100	0	NA	0	NA
A-1C;A57C	NA	NA	NA	NA	NA	NA	NA	NA	0.25		A-1C;A57C	0	NA	0	NA	0	NA	0	NA	2	100	0	NA	0	NA	0	NA	0	NA	0	NA	0	NA	1	100	0	NA
A-1C;A57G	3e-07	4.86829e-05	33.3669	19.697	51.1226	10.3339	17.7558	22.2432	1.66667		A-1C;A57G	4	25	1	100	5	80	1	0	2	50	3	66.6667	2	50	0	NA	0	NA	0	NA	1	0	1	0	0	NA
A-1C;A57T	0.000182517	0.000471914	12.7646	21.7686	58.6406	24.0103	45.876	32.4094	2.08333		A-1C;A57T	4	0	3	66.6667	4	0	2	50	6	33.3333	3	100	0	NA	1	100	0	NA	0	NA	2	0	0	NA	4	0
A-1C;T58A	0.0258237	0.319702	27.304	6.91261	18.8302	37.4364	-8.47376	38.0692	4.66667		A-1C;T58A	6	16.6667	2	0	7	14.2857	3	66.6667	6	16.6667	5	20	6	50	4	25	5	20	3	33.3333	5	0	4	50	4	25
A-1C;T58C	0.000130636	0.000363551	42.8892	19.477	68.8862	9.10904	25.997	21.5018	3.16667		A-1C;T58C	3	66.6667	5	20	3	66.6667	8	75	2	50	2	50	3	66.6667	0	NA	2	50	5	40	2	100	3	100	2	0
A-1C;T58G	NA	NA	NA	NA	NA	NA	NA	NA	0.416667		A-1C;T58G	0	NA	0	NA	1	0	0	NA	0	NA	1	0	0	NA	0	NA	1	0	0	NA	1	0	1	0	0	NA
A-1C;G59A	5.13557e-05	0.000246165	13.8108	26.2814	33.6113	10.5459	19.8004	28.3183	2.91667		A-1C;G59A	2	0	3	0	3	66.6667	3	0	5	20	5	80	4	25	4	25	3	0	1	100	0	NA	2	0	0	NA
A-1C;G59C	0.000294696	0.000706414	4.24365	38.0193	73.6474	29.214	69.4038	47.9471	0.916667		A-1C;G59C	1	0	0	NA	3	0	2	0	0	NA	3	100	0	NA	1	100	0	NA	0	NA	1	0	0	NA	0	NA
A-1C;G59T	0.00165226	0.00304706	36.9692	12.3217	82.2085	21.9675	45.2393	25.1872	1.08333		A-1C;G59T	1	0	1	100	4	25	0	NA	1	0	3	66.6667	1	100	1	100	0	NA	0	NA	1	100	0	NA	1	0
A-1C;T60A	6.1073e-05	0.000147635	7.37268	17.6239	46.2382	9.8633	38.8655	20.1962	5.08333		A-1C;T60A	5	0	3	0	5	40	1	100	9	22.2222	5	60	4	25	4	0	9	77.7778	5	20	5	60	6	83.3333	4	0
A-1C;T60C	3e-07	3.46685e-05	37.4987	21.3988	20.5774	5.34195	-16.9213	22.0555	3.41667		A-1C;T60C	3	33.3333	2	0	1	0	2	50	14	35.7143	5	0	4	0	1	0	0	NA	2	0	4	50	3	0	1	0
A-1C;T60G	0.0119578	0.0294385	25.7968	11.5125	86.3474	29.8679	60.5506	32.0098	0.666667		A-1C;T60G	0	NA	2	50	0	NA	0	NA	2	0	1	0	0	NA	0	NA	0	NA	1	100	1	100	1	100	0	NA
A-1C;T61A	3e-07	8.76787e-05	48.0565	18.9727	29.0656	8.01481	-18.9909	20.5961	4.75		A-1C;T61A	10	50	0	NA	4	0	8	25	6	16.6667	10	30	3	0	2	0	4	25	2	50	2	100	6	33.3333	3	66.6667
A-1C;T61C	0.00384283	0.00394399	21.5321	6.80435	74.7891	10.1219	53.257	12.1964	3.33333		A-1C;T61C	3	33.3333	2	0	7	28.5714	3	0	5	20	4	25	1	100	3	33.3333	1	100	2	50	2	100	7	71.4286	1	100
A-1C;T61G	0.000521649	0.000315495	11.9566	7.59671	76.4148	8.50144	64.4583	11.4011	0.5		A-1C;T61G	0	NA	2	0	0	NA	1	0	2	50	0	NA	0	NA	0	NA	0	NA	0	NA	1	100	0	NA	0	NA
A-1C;T62A	0.00065532	0.0042042	66.1988	14.7629	55.2504	11.5579	-10.9484	18.7491	1.91667		A-1C;T62A	3	66.6667	1	100	2	50	0	NA	2	100	5	40	0	NA	2	50	1	0	0	NA	6	66.6667	1	100	1	0
A-1C;T62C	0.00016768	0.000323185	1.85701	37.8133	68.1939	15.7967	66.3369	40.9802	4		A-1C;T62C	2	0	0	NA	9	11.1111	4	25	6	16.6667	7	100	4	75	4	75	5	40	1	100	4	25	2	0	3	66.6667
A-1C;T62G	NA	NA	NA	NA	NA	NA	NA	NA	0.166667		A-1C;T62G	1	0	1	0	0	NA	0	NA	0	NA	0	NA	0	NA	0	NA	0	NA	0	NA	0	NA	0	NA	0	NA
A-1C;A63C	NA	NA	NA	NA	NA	NA	NA	NA	0.0833333		A-1C;A63C	0	NA	0	NA	0	NA	0	NA	1	100	0	NA	0	NA	0	NA	0	NA	0	NA	0	NA	0	NA	0	NA
A-1C;A63G	8.88219e-05	0.000330506	26.6407	46.114	73.4984	23.723	46.8577	51.8583	1.75		A-1C;A63G	1	100	4	0	2	100	2	100	0	NA	8	62.5	0	NA	3	100	0	NA	0	NA	0	NA	1	0	0	NA
A-1C;A63T	0.033499	0.114881	49.8918	11.8556	100	66.5885	50.1082	67.6357	1.66667		A-1C;A63T	2	50	0	NA	2	50	1	100	1	0	4	50	2	100	2	0	1	100	1	100	3	100	1	100	6	66.6667
A-1C;T64A	0.00725246	0.0219249	42.4574	9.95151	67.5823	18.5895	25.1249	21.0856	2.66667		A-1C;T64A	7	57.1429	4	25	0	NA	1	0	2	50	1	100	4	25	4	50	3	66.6667	1	100	2	100	3	33.3333	5	60
A-1C;T64C	0.362563	31.576	45.1429	11.4083	0	3164.58	-45.1429	3164.6	2		A-1C;T64C	3	0	1	0	2	0	1	100	6	66.6667	7	71.4286	1	100	0	NA	0	NA	0	NA	2	50	1	0	5	40
A-1C;T64G	NA	NA	NA	NA	NA	NA	NA	NA	0.0833333		A-1C;T64G	0	NA	0	NA	0	NA	0	NA	0	NA	1	0	0	NA	0	NA	0	NA	0	NA	0	NA	0	NA	0	NA
A-1C;C65A	1.10801e-05	6.21546e-05	16.3343	24.6104	46.5124	13.7791	30.1781	28.2052	0.833333		A-1C;C65A	2	0	1	0	1	100	0	NA	1	0	0	NA	1	0	0	NA	0	NA	2	100	1	0	1	0	1	0
A-1C;C65G	0.000157236	0.0011156	0	163.339	63.5817	16.0009	63.5817	164.121	0.666667		A-1C;C65G	0	NA	0	NA	2	0	0	NA	0	NA	1	100	1	100	0	NA	0	NA	2	50	2	50	0	NA	1	100
A-1C;C65T	0.00028512	0.000546618	72.2277	21.6209	30.6377	10.0662	-41.5899	23.8494	1.66667		A-1C;C65T	2	50	0	NA	2	100	1	100	2	0	1	0	3	33.3333	2	50	2	50	2	0	2	50	1	0	0	NA
A-1C;C66A	3e-07	3.59517e-05	25.0006	30.1361	54.4572	11.4247	29.4567	32.229	3.58333		A-1C;C66A	5	20	2	0	5	100	2	50	4	50	4	25	6	33.3333	4	25	1	0	1	0	3	100	6	33.3333	1	0
A-1C;C66G	NA	NA	NA	NA	NA	NA	NA	NA	0.0833333		A-1C;C66G	0	NA	1	0	0	NA	0	NA	0	NA	0	NA	0	NA	0	NA	0	NA	0	NA	0	NA	0	NA	0	NA
A-1C;C66T	3.10108e-05	3.6653e-05	7.61257	12.2086	57.653	7.13659	50.0404	14.1415	3.58333		A-1C;C66T	4	0	3	0	2	100	0	NA	1	100	5	60	8	50	5	60	5	60	3	33.3333	4	50	3	66.6667	3	0
A-1C;C67A	8.99517e-06	3.86656e-05	76.0592	32.7849	34.2894	13.276	-41.7698	35.3709	0.916667		A-1C;C67A	1	100	1	100	3	0	0	NA	1	100	1	0	1	0	1	0	0	NA	0	NA	1	0	1	100	0	NA
A-1C;C67T	3e-07	7.81605e-05	25.0175	13.0852	43.4263	7.75406	18.4088	15.2102	0.833333		A-1C;C67T	1	0	0	NA	2	50	2	50	2	50	0	NA	2	50	0	NA	0	NA	0	NA	0	NA	1	0	0	NA
A-1C;A68C	2.04225e-05	0.000526844	0	852.95	55.6909	20.8039	55.6909	853.204	0.5		A-1C;A68C	0	NA	1	0	0	NA	1	100	1	0	1	100	1	0	0	NA	0	NA	0	NA	1	100	0	NA	1	100
A-1C;A68G	1.17394e-05	1.43968e-05	5.64711	5.34739	75.77	6.43985	70.1229	8.37056	2.08333		A-1C;A68G	8	0	1	100	4	50	2	50	1	100	3	66.6667	1	100	3	100	0	NA	0	NA	2	100	0	NA	1	100
A-1C;A68T	5.35269e-05	7.76413e-05	21.4011	12.9753	67.5892	6.63164	46.1881	14.5718	3.66667		A-1C;A68T	6	16.6667	0	NA	8	50	0	NA	4	75	6	50	4	75	3	100	3	66.6667	3	33.3333	7	71.4286	0	NA	0	NA
A-1C;A69C	0.00353565	NA	53.9432	NA	100	NA	46.0568	NA	0.333333		A-1C;A69C	1	100	0	NA	0	NA	0	NA	1	0	0	NA	2	100	0	NA	0	NA	0	NA	0	NA	0	NA	0	NA
A-1C;A69G	0.000403505	0.000661731	28.7737	21.6811	82.1571	12.9739	53.3834	25.2664	3.16667		A-1C;A69G	4	50	2	0	1	100	3	0	8	75	3	100	3	66.6667	4	100	4	75	3	100	0	NA	3	33.3333	2	50
A-1C;A69T	1.06789e-05	0.000124565	21.3268	18.5825	30.9524	7.13316	9.62563	19.9045	4.66667		A-1C;A69T	6	16.6667	5	20	2	50	5	40	6	16.6667	10	10	5	40	2	100	7	14.2857	2	50	2	50	4	25	2	0
A-1C;T70A	0.00110179	0.00336693	33.8921	15.1709	63.4949	13.6274	29.6028	20.3927	2.5		A-1C;T70A	5	60	3	33.3333	2	0	1	0	4	25	2	50	1	100	2	100	2	100	2	0	1	100	5	60	1	100
A-1C;T70C	0.00631858	0.0111715	22.5622	8.80058	73.6861	22.2323	51.124	23.9108	2		A-1C;T70C	4	0	1	100	2	0	3	33.3333	3	33.3333	1	0	5	20	0	NA	1	100	1	100	1	100	2	50	2	0
A-1C;T70G	NA	NA	NA	NA	NA	NA	NA	NA	0.0833333		A-1C;T70G	0	NA	0	NA	0	NA	0	NA	0	NA	0	NA	0	NA	0	NA	0	NA	0	NA	1	100	0	NA	1	0
A-1C;A71C	0.00768743	0.0140617	16.4187	9.15167	59.5644	22.1024	43.1456	23.9222	1.33333		A-1C;A71C	1	0	1	0	1	0	1	0	1	0	4	0	2	0	1	100	0	NA	2	50	0	NA	2	50	0	NA
A-1C;A71G	3.99864e-05	0.000248196	100	180.053	42.7448	15.1286	-57.2552	180.687	1		A-1C;A71G	0	NA	1	100	1	100	3	33.3333	3	33.3333	0	NA	0	NA	0	NA	1	100	1	100	0	NA	2	0	1	0
A-1C;A71T	3e-07	3.72068e-05	83.2477	28.1675	49.845	14.6852	-33.4027	31.7657	0.916667		A-1C;A71T	2	100	1	0	1	0	0	NA	2	0	2	100	0	NA	1	100	0	NA	1	100	1	0	0	NA	0	NA
A-1C;A72C	0.00242186	0.00267235	22.5686	11.4141	77.2993	12.984	54.7307	17.2877	0.666667		A-1C;A72C	1	0	0	NA	1	0	0	NA	0	NA	1	0	1	100	2	50	0	NA	1	100	0	NA	1	100	1	0
A-1C;A72G	0.0147811	0.0169271	26.0907	7.30401	90.3045	17.8666	64.2138	19.3019	2.25		A-1C;A72G	3	33.3333	2	50	3	0	1	0	0	NA	6	33.3333	1	0	5	40	1	100	0	NA	2	50	3	100	2	100
A-1C;A72T	3e-07	8.58877e-05	5.55759	8.71942	33.9367	8.07543	28.3791	11.8845	3.33333		A-1C;A72T	8	0	0	NA	3	33.3333	1	100	3	0	3	33.3333	7	57.1429	1	100	3	33.3333	4	25	4	25	3	0	1	0
A-1C;A73C	0.00202653	NA	10	NA	80.269	NA	70.269	NA	0.5		A-1C;A73C	4	0	0	NA	0	NA	0	NA	1	0	0	NA	0	NA	0	NA	0	NA	1	100	0	NA	0	NA	0	NA
A-1C;A73G	3e-07	0.00150448	50.0089	21.5172	58.7339	11.4727	8.725	24.3847	1.58333		A-1C;A73G	4	50	0	NA	0	NA	0	NA	2	100	1	0	3	33.3333	4	75	2	50	2	50	0	NA	1	100	1	100
A-1C;A73T	0.00483792	0.00735616	29.3197	8.15511	69.139	13.6246	39.8193	15.8788	3.58333		A-1C;A73T	5	20	0	NA	6	33.3333	3	33.3333	3	33.3333	11	36.3636	5	20	0	NA	2	100	1	100	5	60	2	50	5	20
A-1C;A74C	9.916e-05	0.000457552	22.9633	44.6328	57.5107	17.9911	34.5474	48.1224	1.16667		A-1C;A74C	1	0	0	NA	3	33.3333	1	0	1	100	1	100	3	100	3	0	0	NA	0	NA	0	NA	1	100	0	NA
A-1C;A74G	3e-07	3.36182e-05	12.5334	15.5247	39.29	12.0272	26.7565	19.6384	1.08333		A-1C;A74G	3	0	2	50	2	50	1	100	0	NA	2	0	0	NA	0	NA	1	0	0	NA	2	50	0	NA	0	NA
A-1C;A74T	0.000363942	0.000456713	15.3801	13.683	67.9137	10.4278	52.5336	17.2036	3.83333		A-1C;A74T	6	16.6667	2	0	2	0	4	25	7	42.8571	14	64.2857	0	NA	1	100	3	100	1	0	2	100	4	25	1	0
A-1C;C75A	NA	NA	NA	NA	NA	NA	NA	NA	0.0833333		A-1C;C75A	0	NA	0	NA	1	0	0	NA	0	NA	0	NA	0	NA	0	NA	0	NA	0	NA	0	NA	0	NA	1	0
A-1C;C75G	3e-07	0.000737978	74.9721	31.7791	47.3992	18.0803	-27.5729	36.5624	0.5		A-1C;C75G	1	100	0	NA	0	NA	0	NA	1	0	1	0	0	NA	0	NA	1	100	1	0	0	NA	1	100	0	NA
A-1C;C75T	0.000183768	0.0013034	30.8481	12.898	24.677	6.54609	-6.17112	14.4641	2.91667		A-1C;C75T	4	25	0	NA	4	25	7	28.5714	7	14.2857	3	33.3333	1	0	2	50	0	NA	3	0	2	0	2	50	8	50
A-1C;A76C	NA	NA	NA	NA	NA	NA	NA	NA	0.25		A-1C;A76C	0	NA	0	NA	0	NA	0	NA	0	NA	2	100	0	NA	0	NA	0	NA	1	0	0	NA	0	NA	0	NA
A-1C;A76G	0.000281899	0.0014436	20.0296	52.6549	67.4114	36.9919	47.3818	64.3502	1.08333		A-1C;A76G	2	50	0	NA	3	0	0	NA	1	0	4	100	0	NA	2	0	0	NA	0	NA	0	NA	1	100	1	0
A-1C;A76T	3e-07	1.84299e-05	7.14414	4.16198	44.9162	3.13046	37.7721	5.20786	4.83333		A-1C;A76T	6	0	0	NA	9	44.4444	3	66.6667	9	44.4444	5	40	8	37.5	2	50	5	40	5	60	3	33.3333	3	33.3333	1	0
A-1C;T77A	0.869585	110.325	23.589	8.87846	100	8833.53	76.411	8833.54	5.66667		A-1C;T77A	5	0	3	0	7	57.1429	6	16.6667	8	25	11	54.5455	6	33.3333	7	0	2	100	2	50	4	0	7	42.8571	0	NA
A-1C;T77C	0.000876402	0.0012059	9.87443	7.45991	47.7059	11.9197	37.8315	14.0616	2.83333		A-1C;T77C	6	0	1	0	2	0	1	0	5	20	5	20	10	40	0	NA	0	NA	1	100	2	0	1	100	0	NA
A-1C;T77G	1.43373e-05	5.23628e-05	0	64.0554	25.9483	1.59006	25.9483	64.0751	0.5		A-1C;T77G	0	NA	2	0	1	0	1	0	0	NA	0	NA	1	0	0	NA	0	NA	0	NA	0	NA	1	0	0	NA
A-1C;A78C	0.111439	NA	16.5836	NA	100	NA	83.4164	NA	0.416667		A-1C;A78C	2	0	0	NA	0	NA	2	0	0	NA	0	NA	0	NA	0	NA	1	0	0	NA	0	NA	0	NA	0	NA
A-1C;A78G	0.000235729	0.00125712	44.4755	25.5481	66.3708	13.3449	21.8952	28.8235	1.83333		A-1C;A78G	1	100	1	0	1	0	0	NA	3	33.3333	4	100	3	66.6667	2	50	1	0	1	100	4	50	1	100	0	NA
A-1C;A78T	0.000820026	0.00323035	34.3268	7.86851	24.1549	6.31087	-10.172	10.0866	4.16667		A-1C;A78T	7	28.5714	2	50	5	20	4	50	6	16.6667	3	33.3333	5	20	5	20	0	NA	2	50	8	25	3	0	5	0
A-1C;G79A	0.00128201	0.0030798	14.4477	6.3936	29.3799	6.60621	14.9322	9.19348	1.58333		A-1C;G79A	2	0	0	NA	3	0	1	0	2	0	2	0	3	33.3333	0	NA	1	0	2	0	1	0	2	50	3	33.3333
A-1C;G79C	0.0252996	0.305069	19.6732	4.41993	28.4854	42.0864	8.8122	42.3179	0.416667		A-1C;G79C	1	0	0	NA	0	NA	0	NA	2	0	0	NA	0	NA	0	NA	0	NA	1	0	1	0	0	NA	0	NA
A-1C;G79T	0.000906971	0.00153994	10.2056	11.5368	48.9395	12.2112	38.7339	16.7991	4.91667		A-1C;G79T	5	20	4	25	6	0	9	11.1111	4	0	11	45.4545	2	50	4	75	2	100	3	33.3333	6	16.6667	3	33.3333	3	0
A-1C;A80C	0.0163538	0.0853114	16.1263	26.9782	100	151.646	83.8737	154.027	1.16667		A-1C;A80C	4	0	0	NA	0	NA	0	NA	1	100	0	NA	3	0	0	NA	0	NA	3	100	3	33.3333	0	NA	1	0
A-1C;A80G	0.00284541	0.00457998	7.31265	16.5305	75.5493	30.7096	68.2366	34.876	1.91667		A-1C;A80G	5	0	1	0	0	NA	0	NA	1	0	3	0	3	0	4	100	1	100	4	25	0	NA	1	100	7	42.8571
A-1C;A80T	0.00221673	0.00491991	19.99	12.9481	59.3095	17.5843	39.3195	21.8372	3.58333		A-1C;A80T	6	33.3333	1	0	5	0	2	50	1	0	6	66.6667	3	0	5	40	3	100	3	33.3333	4	25	4	75	8	37.5
A-1C;G81A	0.00365758	0.00763465	22.8809	15.4728	72.9816	23.8827	50.1007	28.4568	1.75		A-1C;G81A	1	0	1	0	2	0	3	66.6667	0	NA	3	0	1	0	2	100	1	100	2	100	5	40	0	NA	2	100
A-1C;G81C	NA	NA	NA	NA	NA	NA	NA	NA	0		A-1C;G81C	0	NA	0	NA	0	NA	0	NA	0	NA	0	NA	0	NA	0	NA	0	NA	0	NA	0	NA	0	NA	0	NA
A-1C;G81T	0.0494186	0.135974	15.3976	10.2241	100	99.7291	84.6024	100.252	1.66667		A-1C;G81T	3	33.3333	0	NA	2	0	0	NA	6	0	0	NA	3	66.6667	1	0	0	NA	2	0	1	100	2	100	1	0
A-1C;A82C	0.00302227	0.00935025	43.973	16.455	85.5687	31.0847	41.5957	35.1714	0.916667		A-1C;A82C	2	0	1	100	1	100	0	NA	0	NA	3	33.3333	1	100	0	NA	2	100	0	NA	1	100	0	NA	2	50
A-1C;A82G	0.0314109	0.174935	37.8935	14.6483	100	170.496	62.1065	171.124	1.91667		A-1C;A82G	4	25	1	100	1	0	0	NA	2	100	5	40	4	0	3	66.6667	1	100	1	100	1	100	0	NA	1	100
A-1C;A82T	0.0509086	0.286218	41.1464	9.97111	0	111.979	-41.1464	112.423	3.75		A-1C;A82T	5	40	2	50	1	0	4	50	5	20	10	30	2	50	1	100	5	60	1	100	7	0	2	50	1	100
A-1C;A83C	1.04408e-05	8.33333e-05	24.3214	25.8825	42.4083	12.4476	18.0868	28.7202	0.916667		A-1C;A83C	1	0	1	0	2	50	1	100	2	50	0	NA	0	NA	0	NA	0	NA	0	NA	2	50	2	0	1	0
A-1C;A83G	3e-07	0.000309198	56.2435	17.7692	50.4297	7.98834	-5.8138	19.4822	3.33333		A-1C;A83G	7	57.1429	0	NA	7	57.1429	1	0	6	33.3333	6	33.3333	1	0	2	50	4	75	1	100	3	33.3333	2	100	3	66.6667
A-1C;A83T	0.00430749	0.0103237	14.6823	18.3451	59.8402	25.9554	45.1579	31.784	4		A-1C;A83T	2	0	1	0	6	50	4	25	5	40	9	0	5	60	3	100	0	NA	1	100	4	50	8	37.5	1	0
A-1C;A84C	NA	NA	NA	NA	NA	NA	NA	NA	0.25		A-1C;A84C	1	0	0	NA	1	0	0	NA	0	NA	0	NA	0	NA	0	NA	0	NA	1	0	0	NA	0	NA	0	NA
A-1C;A84G	9.85605e-05	0.000164552	15.3174	13.4961	57.515	7.92358	42.1976	15.6502	1.16667		A-1C;A84G	2	0	1	0	1	0	0	NA	1	100	2	50	0	NA	2	50	2	50	1	100	1	0	1	100	0	NA
A-1C;A84T	0.00286672	0.0115734	29.4731	15.0139	61.1566	25.1278	31.6835	29.2716	2.58333		A-1C;A84T	3	100	1	0	5	0	2	0	6	16.6667	4	50	3	33.3333	1	100	1	100	1	100	2	100	2	0	1	100
A-1C;T85A	0.0421784	0.177938	31.4074	7.46208	66.9707	61.5801	35.5633	62.0306	3.58333		A-1C;T85A	2	0	1	100	4	25	2	50	6	50	8	12.5	4	25	0	NA	3	33.3333	3	66.6667	5	40	5	60	5	40
A-1C;T85C	0.00361087	0.0119755	20.6443	10.6096	44.4106	15.6202	23.7663	18.8827	4		A-1C;T85C	1	0	4	25	9	22.2222	4	0	6	33.3333	6	16.6667	3	33.3333	5	20	1	0	2	100	4	75	3	0	2	50
A-1C;T85G	9.24704e-05	0.0100482	100	6331.08	32.3864	22.4264	-67.6136	6331.12	0.583333		A-1C;T85G	0	NA	0	NA	0	NA	0	NA	2	50	1	0	1	0	0	NA	0	NA	1	100	2	0	0	NA	1	100
A-1C;T86A	3e-07	1.0532e-05	49.9431	23.1221	18.5005	4.49833	-31.4426	23.5556	4.33333		A-1C;T86A	2	50	5	0	2	50	4	25	4	0	5	0	14	14.2857	4	50	2	0	1	0	3	33.3333	6	16.6667	3	0
A-1C;T86C	3.47046e-05	0.000138875	35.4729	17.8165	58.4152	9.84191	22.9423	20.3541	1.91667		A-1C;T86C	6	33.3333	2	50	1	0	1	100	1	100	2	100	5	60	0	NA	0	NA	3	66.6667	1	0	1	0	1	0
A-1C;T86G	NA	NA	NA	NA	NA	NA	NA	NA	0.166667		A-1C;T86G	0	NA	0	NA	0	NA	0	NA	0	NA	0	NA	1	0	0	NA	0	NA	1	0	0	NA	0	NA	0	NA
A-1C;C87A	0.107351	1.06074	40.5894	9.96453	0	247.706	-40.5894	247.906	1.91667		A-1C;C87A	1	0	3	66.6667	2	0	0	NA	4	25	1	0	4	75	1	0	1	100	2	50	3	0	1	0	0	NA
A-1C;C87G	0.017861	0.21896	32.4568	16.8391	100	344.068	67.5432	344.48	0.416667		A-1C;C87G	2	50	0	NA	1	0	0	NA	0	NA	1	0	0	NA	0	NA	0	NA	1	100	0	NA	0	NA	0	NA
A-1C;C87T	0.0212808	0.0732161	23.4252	15.3914	88.519	68.8674	65.0938	70.5664	1.58333		A-1C;C87T	0	NA	3	33.3333	3	0	2	0	1	0	3	66.6667	0	NA	0	NA	2	0	0	NA	4	100	1	0	0	NA
A-1C;T88A	0.000148089	0.000643515	59.4245	20.6533	41.0456	9.84253	-18.3789	22.8787	4.08333		A-1C;T88A	6	50	1	100	6	66.6667	6	33.3333	3	66.6667	6	16.6667	0	NA	5	20	5	80	3	66.6667	2	0	6	50	2	0
A-1C;T88C	4.84313e-06	3.83668e-05	9.99574	17.7127	42.5117	8.30214	32.5159	19.5619	4.33333		A-1C;T88C	4	0	3	33.3333	3	33.3333	4	50	13	46.1538	2	50	5	20	1	0	4	0	3	33.3333	7	85.7143	3	66.6667	3	0
A-1C;T88G	3e-07	2.70836e-05	83.3047	23.0721	40.1372	19.3691	-43.1675	30.1245	0.5		A-1C;T88G	2	100	1	0	0	NA	1	0	1	100	1	0	0	NA	0	NA	0	NA	0	NA	0	NA	0	NA	0	NA
A-1C;C89A	5.13591e-05	0.000152487	16.1889	14.1108	46.2925	8.36749	30.1036	16.4052	1		A-1C;C89A	2	0	1	0	0	NA	0	NA	2	50	2	50	0	NA	1	0	2	50	0	NA	1	100	1	0	1	100
A-1C;C89G	0.00456469	NA	51.2214	NA	100	NA	48.7786	NA	0.25		A-1C;C89G	1	100	0	NA	0	NA	1	0	0	NA	0	NA	1	100	0	NA	0	NA	0	NA	0	NA	0	NA	0	NA
A-1C;C89T	1.03634	310.753	33.0204	11.9382	100	18474.7	66.9796	18474.7	1.75		A-1C;C89T	1	100	5	20	2	100	2	0	0	NA	3	0	0	NA	3	33.3333	2	0	0	NA	1	0	2	50	1	100
A-1C;A90C	0.00773382	0.0337702	81.3325	36.0068	23.5881	34.6675	-57.7444	49.9833	0.5		A-1C;A90C	0	NA	0	NA	0	NA	1	100	0	NA	0	NA	1	100	0	NA	0	NA	0	NA	2	0	2	50	0	NA
A-1C;A90G	0.125779	0.705339	24.4255	7.78993	100	265.401	75.5745	265.515	4		A-1C;A90G	11	36.3636	0	NA	5	40	5	0	4	25	6	50	6	16.6667	3	33.3333	0	NA	3	0	3	33.3333	2	100	4	25
A-1C;A90T	0.000585686	0.000793874	9.02644	10.1107	50.9016	10.5215	41.8751	14.5921	4.16667		A-1C;A90T	4	0	1	0	5	0	2	50	9	22.2222	9	33.3333	6	33.3333	7	71.4286	1	100	1	100	3	33.3333	2	0	5	60
A-1C;G91A	3e-07	7.23732e-05	35.8781	30.5232	22.5277	7.94506	-13.3504	31.5403	3		A-1C;G91A	3	33.3333	1	0	5	0	1	100	4	0	7	28.5714	5	0	3	66.6667	2	0	1	0	3	33.3333	1	100	2	0
A-1C;G91C	0.00667461	0.0288803	28.5472	14.9929	60.3961	43.264	31.8489	45.7882	1		A-1C;G91C	3	66.6667	0	NA	2	0	1	0	0	NA	2	0	1	0	1	100	0	NA	0	NA	2	50	0	NA	0	NA
A-1C;G91T	3e-07	9.43582e-05	6.28209	8.70099	12.1195	4.08712	5.83743	9.61311	4.83333		A-1C;G91T	7	0	5	20	1	0	3	33.3333	4	25	9	0	8	0	1	0	2	0	4	0	9	44.4444	5	0	1	0
A-1C;G92A	1.28077e-05	2.99603e-05	41.4479	14.8517	12.4998	3.90014	-28.9481	15.3553	3.25		A-1C;G92A	5	40	2	0	5	20	2	0	1	0	9	0	3	0	1	0	2	0	4	50	2	0	3	0	0	NA
A-1C;G92C	0.00610063	0.00453089	25.561	0.719293	15.5151	1.08267	-10.0459	1.29983	0.666667		A-1C;G92C	1	0	0	NA	1	0	0	NA	1	0	1	0	0	NA	0	NA	0	NA	2	0	0	NA	2	0	0	NA
A-1C;G92T	7.45653e-06	7.59184e-05	9.96113	18.6346	32.0404	10.9524	22.0793	21.6149	1.75		A-1C;G92T	4	0	1	0	2	0	2	100	3	0	0	NA	2	0	1	100	1	0	1	100	1	0	3	0	1	100
A-1C;C93A	0.00233303	0.00448088	23.6796	18.3016	75.1691	19.7374	51.4895	26.9168	1		A-1C;C93A	2	0	0	NA	1	0	0	NA	1	100	2	0	1	100	1	100	1	0	1	100	0	NA	2	100	1	0
A-1C;C93G	NA	NA	NA	NA	NA	NA	NA	NA	0.0833333		A-1C;C93G	0	NA	0	NA	0	NA	0	NA	0	NA	1	100	0	NA	0	NA	0	NA	0	NA	0	NA	0	NA	0	NA
A-1C;C93T	0.00140537	0.00362667	14.687	19.2754	57.8297	22.4229	43.1427	29.5691	2.66667		A-1C;C93T	4	50	0	NA	2	50	6	0	7	14.2857	3	33.3333	2	100	0	NA	4	50	0	NA	3	66.6667	1	0	1	0
A-1C;A94C	0.0544384	0.417236	39.1151	12.9861	100	194.589	60.8849	195.022	0.916667		A-1C;A94C	2	0	1	100	1	100	0	NA	4	25	0	NA	1	0	0	NA	0	NA	0	NA	1	100	1	100	2	0
A-1C;A94G	7.83003e-05	0.000108226	9.15329	14.3482	79.0812	8.24256	69.9279	16.5472	2.25		A-1C;A94G	4	0	0	NA	1	0	1	100	1	100	3	100	2	100	0	NA	5	60	5	100	3	33.3333	2	50	3	33.3333
A-1C;A94T	0.00116279	0.00143869	6.15824	7.11873	66.9148	14.1005	60.7565	15.7956	4.33333		A-1C;A94T	9	0	5	20	8	0	4	25	5	40	6	33.3333	1	100	3	0	3	100	1	100	3	66.6667	4	75	0	NA
A-1C;A95C	3e-07	0.0533577	0.103844	9.87002e+06	55.7799	30.3963	55.676	9.87002e+06	0.416667		A-1C;A95C	0	NA	0	NA	2	50	1	100	0	NA	1	100	0	NA	0	NA	0	NA	1	0	0	NA	0	NA	0	NA
A-1C;A95G	0.000220836	0.000459972	30.6297	22.2169	73.4084	11.0843	42.7787	24.8284	2.91667		A-1C;A95G	4	50	2	0	4	25	4	75	7	71.4286	1	100	1	0	3	33.3333	0	NA	3	33.3333	5	100	1	100	0	NA
A-1C;A95T	0.0646987	0.231695	27.0938	9.40034	90.1012	118.306	63.0074	118.679	5.25		A-1C;A95T	9	22.2222	1	0	3	0	8	25	6	33.3333	7	57.1429	7	42.8571	4	50	5	0	5	60	3	100	5	40	3	33.3333
A-1C;A96C	4.51516e-05	NA	0	NA	25.0282	NA	25.0282	NA	0.333333		A-1C;A96C	0	NA	0	NA	2	0	0	NA	0	NA	0	NA	0	NA	0	NA	0	NA	1	0	0	NA	1	0	0	NA
A-1C;A96G	4.83945e-05	0.000160393	10.5065	16.6428	41.9912	11.7892	31.4848	20.3953	1.91667		A-1C;A96G	4	0	1	0	2	50	2	0	1	0	4	75	2	0	0	NA	2	100	0	NA	2	0	3	33.3333	0	NA
A-1C;A96T	0.000121742	0.000625019	22.7459	20.9355	37.3645	8.66368	14.6186	22.6573	2.41667		A-1C;A96T	1	0	1	0	1	0	4	25	4	25	4	50	5	60	1	0	5	60	0	NA	3	0	0	NA	1	0
A-1C;A97C	8.5609e-05	0.000362825	0	196.765	85.5134	17.2831	85.5134	197.523	0.5		A-1C;A97C	0	NA	0	NA	1	0	1	100	2	100	1	100	0	NA	0	NA	0	NA	0	NA	0	NA	1	100	0	NA
A-1C;A97G	0.0608329	0.189903	41.3057	7.75018	100	76.873	58.6943	77.2627	7.33333		A-1C;A97G	6	33.3333	9	33.3333	10	40	8	50	16	62.5	12	33.3333	3	33.3333	5	40	7	28.5714	4	75	2	0	6	100	2	0
A-1C;A97T	0.0303168	0.12722	64.1534	13.59	10.4566	92.0588	-53.6968	93.0565	2.58333		A-1C;A97T	3	66.6667	1	100	3	33.3333	5	40	2	0	5	80	4	100	2	100	0	NA	3	0	1	0	2	50	0	NA
A-1C;G98A	0.0988769	1.59649	53.7	21.8293	100	377.278	46.3	377.909	0.75		A-1C;G98A	1	0	0	NA	2	100	0	NA	0	NA	1	100	0	NA	1	0	0	NA	1	0	0	NA	3	100	1	0
A-1C;G98C	NA	NA	NA	NA	NA	NA	NA	NA	0.25		A-1C;G98C	0	NA	0	NA	0	NA	2	0	0	NA	0	NA	0	NA	0	NA	0	NA	0	NA	1	0	0	NA	0	NA
A-1C;G98T	9.11602e-05	0.000346829	16.7519	19.2086	74.2625	11.5036	57.5106	22.3898	0.833333		A-1C;G98T	2	0	0	NA	0	NA	0	NA	1	100	1	100	1	0	0	NA	0	NA	2	100	2	100	1	100	1	0
A-1C;A99C	NA	NA	NA	NA	NA	NA	NA	NA	0.0833333		A-1C;A99C	0	NA	0	NA	0	NA	0	NA	0	NA	0	NA	0	NA	0	NA	1	100	0	NA	0	NA	0	NA	0	NA
A-1C;A99G	9.30757e-05	0.000610325	59.3969	32.1354	44.1709	11.8051	-15.226	34.2351	1.83333		A-1C;A99G	2	50	0	NA	2	100	2	0	3	33.3333	5	40	1	0	1	100	2	0	1	100	1	100	2	50	0	NA
A-1C;A99T	1.16795e-05	2.24186e-05	10.1662	13.0964	68.144	7.72344	57.9777	15.2041	2.33333		A-1C;A99T	4	0	3	66.6667	3	33.3333	0	NA	1	100	1	100	3	100	5	40	2	100	4	75	1	100	1	0	2	100
A-1C;A100C	NA	NA	NA	NA	NA	NA	NA	NA	0.25		A-1C;A100C	2	50	0	NA	0	NA	1	100	0	NA	0	NA	0	NA	0	NA	0	NA	0	NA	0	NA	0	NA	0	NA
A-1C;A100G	0.00479657	0.0117532	41.7246	10.6088	86.1589	27.6247	44.4343	29.5917	2.08333		A-1C;A100G	2	0	2	100	3	33.3333	3	33.3333	5	40	3	33.3333	3	66.6667	0	NA	2	100	1	100	1	100	0	NA	4	0
A-1C;A100T	7.33223e-07	2.60654e-05	70.0018	24.9917	32.5282	9.97597	-37.4736	26.9092	2.5		A-1C;A100T	4	75	3	33.3333	2	50	4	0	2	50	7	57.1429	3	0	0	NA	2	50	0	NA	3	66.6667	0	NA	2	0
A-1C;T101A	0.00069665	0.000793014	15.6216	14.2306	86.6645	15.4595	71.0429	21.012	2.91667		A-1C;T101A	4	0	5	20	5	20	3	66.6667	6	16.6667	3	100	3	66.6667	1	0	0	NA	0	NA	5	100	0	NA	3	33.3333
A-1C;T101C	0.00038361	0.000729988	31.6804	13.4282	70.6896	8.644	39.0092	15.9698	2.58333		A-1C;T101C	2	50	4	25	4	25	0	NA	2	50	4	50	3	100	2	100	2	50	3	66.6667	3	66.6667	2	50	0	NA
A-1C;T101G	0.00197276	NA	51.0643	NA	100	NA	48.9357	NA	0.25		A-1C;T101G	1	100	0	NA	1	0	0	NA	0	NA	1	100	0	NA	0	NA	0	NA	0	NA	0	NA	0	NA	0	NA
A-1C;T102A	0.0123128	0.0161862	23.9505	8.35808	100	34.602	76.0495	35.5971	2.25		A-1C;T102A	3	0	3	33.3333	2	50	3	33.3333	2	0	3	33.3333	3	33.3333	2	0	2	100	2	100	2	100	0	NA	1	0
A-1C;T102C	0.000128635	0.00016958	11.404	9.15989	49.4183	6.87451	38.0143	11.4526	2.25		A-1C;T102C	3	0	3	0	5	40	0	NA	4	25	2	50	1	0	0	NA	1	100	2	50	2	50	4	50	0	NA
A-1C;A103C	NA	NA	NA	NA	NA	NA	NA	NA	0.0833333		A-1C;A103C	0	NA	0	NA	0	NA	0	NA	0	NA	0	NA	0	NA	0	NA	0	NA	0	NA	0	NA	1	100	0	NA
A-1C;A103G	5.60295e-06	6.42133e-05	83.4379	21.9914	63.1773	8.7836	-20.2606	23.6806	1.58333		A-1C;A103G	2	100	1	100	0	NA	1	0	2	50	1	0	2	100	3	33.3333	3	100	1	100	2	50	1	100	1	0
A-1C;A103T	0.0818899	0.497896	43.281	8.16658	0	123.832	-43.281	124.101	2.66667		A-1C;A103T	2	0	0	NA	6	50	0	NA	3	66.6667	4	25	4	50	4	50	2	50	0	NA	3	33.3333	4	0	1	0
A-1C;T104A	0.0438241	0.128782	18.1653	8.1307	100	94.654	81.8347	95.0025	3.33333		A-1C;T104A	3	33.3333	3	0	4	25	4	75	8	12.5	7	0	0	NA	5	40	0	NA	2	50	2	50	2	100	0	NA
A-1C;T104C	3e-07	7.56223e-05	25.0589	23.2821	39.8145	10.2253	14.7556	25.4285	2.25		A-1C;T104C	5	20	2	50	3	66.6667	1	100	4	0	5	60	2	50	2	0	1	100	1	100	1	0	0	NA	0	NA
A-1C;T104G	NA	NA	NA	NA	NA	NA	NA	NA	0.0833333		A-1C;T104G	0	NA	1	0	0	NA	0	NA	0	NA	0	NA	0	NA	0	NA	0	NA	0	NA	0	NA	0	NA	0	NA
A-1C;A105C	NA	NA	NA	NA	NA	NA	NA	NA	0.166667		A-1C;A105C	0	NA	1	0	0	NA	0	NA	0	NA	0	NA	0	NA	0	NA	0	NA	1	0	0	NA	0	NA	0	NA
A-1C;A105G	0.000109821	0.000492505	59.7947	32.2434	33.1367	14.1857	-26.6579	35.2259	1.75		A-1C;A105G	1	0	2	100	3	66.6667	4	25	2	0	2	0	3	0	1	100	0	NA	1	100	1	0	1	100	2	50
A-1C;A105T	0.000117464	0.000352732	12.1136	17.9955	43.4746	10.7465	31.3609	20.9601	2		A-1C;A105T	3	0	1	0	2	0	0	NA	4	25	6	66.6667	1	100	1	0	1	100	1	0	3	0	1	100	3	33.3333
A-1C;C106A	4.0491e-05	0.000349424	0	180.69	47.8614	16.5152	47.8614	181.443	1.91667		A-1C;C106A	0	NA	6	0	2	100	1	0	2	100	4	25	2	100	1	100	2	0	0	NA	2	0	1	0	1	100
A-1C;C106G	3e-07	3.40508e-05	62.4627	22.4362	36.2175	13.0909	-26.2452	25.9761	0.666667		A-1C;C106G	3	66.6667	1	0	0	NA	0	NA	0	NA	1	0	1	0	1	0	0	NA	0	NA	1	100	0	NA	0	NA
A-1C;C106T	0.000495526	0.000686782	50.8925	8.82239	77.2056	4.84828	26.313	10.0668	2.5		A-1C;C106T	2	50	2	50	1	100	3	33.3333	4	75	4	75	1	100	2	100	1	100	2	100	4	75	4	75	5	20
A-1C;T107A	0.00100093	0.00544591	58.3165	14.5295	44.2288	12.5009	-14.0877	19.1671	3.33333		A-1C;T107A	3	66.6667	4	25	2	50	3	100	5	40	5	40	3	33.3333	1	0	4	75	3	33.3333	4	25	3	66.6667	5	60
A-1C;T107C	0.00206691	0.00246043	60.6913	9.18907	13.5164	11.4104	-47.1748	14.6505	2.66667		A-1C;T107C	6	50	3	33.3333	2	100	2	50	1	100	6	50	2	0	5	20	0	NA	3	0	1	0	1	0	3	66.6667
A-1C;T107G	0.000233545	0.00125321	7.67559	100.442	60.154	15.7746	52.4784	101.673	0.833333		A-1C;T107G	0	NA	0	NA	1	0	0	NA	1	0	0	NA	2	100	1	100	1	0	0	NA	1	100	3	33.3333	2	100
A-1C;T108A	2.45289e-05	0.000126362	64.0142	29.0091	42.9316	8.35598	-21.0826	30.1886	4.33333		A-1C;T108A	3	66.6667	3	66.6667	3	33.3333	8	37.5	4	75	6	16.6667	6	33.3333	3	0	5	60	2	100	6	66.6667	3	33.3333	5	20
A-1C;T108C	7.61303e-05	0.000131436	10.1179	20.4161	59.6128	10.5447	49.4949	22.9784	3.75		A-1C;T108C	6	16.6667	5	0	6	66.6667	2	50	2	50	3	100	3	33.3333	4	25	3	33.3333	3	100	6	33.3333	2	50	3	33.3333
A-1C;T108G	0.000675536	0.0010346	14.8333	19.3482	81.1788	26.7649	66.3455	33.0259	0.666667		A-1C;T108G	2	0	0	NA	0	NA	0	NA	1	0	4	75	0	NA	0	NA	0	NA	0	NA	1	100	0	NA	1	100
A-1C;T109A	3e-07	2.3646e-05	12.5082	16.7201	44.101	6.65588	31.5929	17.9962	4.58333		A-1C;T109A	3	0	3	33.3333	6	66.6667	2	50	3	33.3333	10	30	3	0	8	62.5	1	100	4	25	7	57.1429	5	60	4	75
A-1C;T109C	7.84586e-05	8.95346e-05	19.2579	12.3648	67.5729	7.69715	48.315	14.5648	3.91667		A-1C;T109C	7	14.2857	4	25	9	55.5556	5	40	6	66.6667	1	0	0	NA	3	66.6667	3	100	1	100	3	33.3333	5	80	0	NA
A-1C;T109G	NA	NA	NA	NA	NA	NA	NA	NA	0.416667		A-1C;T109G	0	NA	0	NA	1	100	0	NA	1	100	1	100	0	NA	0	NA	1	100	1	100	0	NA	0	NA	0	NA
A-1C;G110A	0.00566099	0.0170683	36.6122	13.4636	74.4157	32.2456	37.8034	34.9435	3.08333		A-1C;G110A	6	66.6667	2	0	5	20	0	NA	7	71.4286	7	14.2857	1	0	2	100	4	75	0	NA	2	50	1	100	2	50
A-1C;G110C	NA	NA	NA	NA	NA	NA	NA	NA	0.25		A-1C;G110C	0	NA	0	NA	0	NA	0	NA	0	NA	0	NA	0	NA	1	0	0	NA	2	0	0	NA	0	NA	0	NA
A-1C;G110T	3e-07	0.000177307	12.5035	25.6742	62.7863	19.827	50.2829	32.4388	0.916667		A-1C;G110T	3	0	0	NA	0	NA	2	100	0	NA	2	0	0	NA	2	100	0	NA	1	100	0	NA	1	100	0	NA
A-1C;A111C	NA	NA	NA	NA	NA	NA	NA	NA	0.0833333		A-1C;A111C	0	NA	0	NA	0	NA	0	NA	1	0	0	NA	0	NA	0	NA	0	NA	0	NA	0	NA	0	NA	1	0
A-1C;A111G	0.000696828	0.00564056	34.6306	18.4097	44.816	16.6055	10.1854	24.7923	2.5		A-1C;A111G	5	40	1	0	1	100	2	0	3	0	9	66.6667	1	100	2	50	2	50	0	NA	2	0	2	50	1	0
A-1C;A111T	0.25019	5.12405	34.603	7.14787	100	1001.05	65.397	1001.07	5.25		A-1C;A111T	8	37.5	2	50	5	0	10	60	10	50	8	37.5	5	40	7	42.8571	2	0	0	NA	3	33.3333	3	66.6667	3	33.3333
A-1C;T112A	0.0122646	0.0306359	26.3849	11.2793	100	67.3487	73.6151	68.2867	1.83333		A-1C;T112A	1	0	1	0	2	50	2	0	2	0	5	60	3	33.3333	1	0	1	0	4	100	0	NA	0	NA	0	NA
A-1C;T112C	0.0697484	0.209949	27.0679	8.54473	100	109.191	72.9321	109.525	2.33333		A-1C;T112C	1	0	1	0	3	0	1	0	5	60	4	25	0	NA	2	0	4	50	1	100	4	25	2	100	3	66.6667
A-1C;T112G	NA	NA	NA	NA	NA	NA	NA	NA	0.0833333		A-1C;T112G	0	NA	0	NA	0	NA	0	NA	1	0	0	NA	0	NA	0	NA	0	NA	0	NA	0	NA	0	NA	1	0
A-1C;A113C	NA	NA	NA	NA	NA	NA	NA	NA	0.166667		A-1C;A113C	0	NA	0	NA	0	NA	0	NA	0	NA	0	NA	2	0	0	NA	0	NA	0	NA	0	NA	0	NA	0	NA
A-1C;A113G	0.000275281	0.00153381	48.1024	22.8383	66.1041	14.936	18.0017	27.2887	1.5		A-1C;A113G	1	100	1	0	4	50	1	0	2	100	1	100	4	50	2	100	1	100	0	NA	1	0	0	NA	1	0
A-1C;A113T	0.0301766	0.112658	46.3056	9.33994	83.4989	47.2239	37.1933	48.1387	3		A-1C;A113T	2	50	0	NA	2	50	5	40	3	66.6667	5	60	4	50	2	0	0	NA	1	100	7	85.7143	5	60	1	0
A-1C;G114A	0.0004796	0.00148175	24.8847	16.7965	54.8662	13.1088	29.9815	21.3064	2.25		A-1C;G114A	7	28.5714	1	0	2	0	1	0	3	66.6667	3	33.3333	1	100	3	33.3333	1	0	0	NA	2	0	3	100	0	NA
A-1C;G114C	0.00167199	0.000898966	19.1668	3.36335	87.7879	3.60759	68.621	4.93223	0.666667		A-1C;G114C	2	0	1	0	0	NA	0	NA	0	NA	0	NA	0	NA	1	100	1	100	0	NA	0	NA	3	100	2	50
A-1C;G114T	9.0708e-06	4.65997e-05	50.2381	23.1737	28.5901	6.26169	-21.648	24.0047	2.66667		A-1C;G114T	2	50	3	33.3333	4	25	2	0	3	33.3333	4	25	4	0	1	100	1	0	3	33.3333	1	0	4	50	6	33.3333
A-1C;A115C	NA	NA	NA	NA	NA	NA	NA	NA	0.166667		A-1C;A115C	0	NA	0	NA	0	NA	2	100	0	NA	0	NA	0	NA	0	NA	0	NA	0	NA	0	NA	0	NA	1	0
A-1C;A115G	6.45309	267543	47.564	12.2225	100	2.15888e+06	52.436	2.15888e+06	1.75		A-1C;A115G	2	100	2	0	2	100	0	NA	2	0	3	66.6667	1	0	1	0	4	50	2	50	2	50	0	NA	0	NA
A-1C;A115T	0.000405719	0.00318073	64.125	18.7182	73.0859	9.05771	8.96092	20.7946	2.33333		A-1C;A115T	1	100	0	NA	4	75	1	0	3	66.6667	3	100	2	100	0	NA	1	100	6	66.6667	5	80	2	50	1	100
A-1C;C116A	3e-07	5.02185e-05	37.2122	28.5032	21.6002	7.55841	-15.612	29.4883	3		A-1C;C116A	3	33.3333	2	0	3	0	7	0	1	0	2	0	3	66.6667	1	0	2	50	1	100	7	14.2857	4	50	4	0
A-1C;C116G	3e-07	0.045317	100	9.56142e+06	36.5076	12.0313	-63.4924	9.56142e+06	1.08333		A-1C;C116G	0	NA	0	NA	2	50	2	0	1	0	1	0	1	100	2	0	0	NA	2	50	1	100	1	0	0	NA
A-1C;C116T	0.000491229	0.00108391	29.0743	16.5468	65.4976	13.3656	36.4232	21.2706	3.58333		A-1C;C116T	7	28.5714	4	50	4	25	3	0	5	80	5	40	8	75	1	100	1	100	1	100	2	100	2	0	2	0
A-1C;T117A	0.0114709	0.029317	7.83995	4.23282	27.9999	14.5508	20.16	15.154	5.41667		A-1C;T117A	7	14.2857	4	0	2	0	9	0	8	0	5	40	8	0	3	33.3333	3	33.3333	3	0	4	25	9	22.2222	3	0
A-1C;T117C	5.12377e-05	0.000149157	18.3069	21.8687	46.7179	11.8824	28.4111	24.8884	1		A-1C;T117C	1	0	2	0	2	50	0	NA	1	100	3	33.3333	0	NA	0	NA	0	NA	1	0	2	50	0	NA	1	100
A-1C;T117G	0.0580152	0.724267	26.0149	13.7839	100	336.67	73.9851	336.952	0.583333		A-1C;T117G	1	0	0	NA	0	NA	2	50	0	NA	2	0	1	0	0	NA	0	NA	0	NA	0	NA	1	100	0	NA
A-1C;C118A	0.000429122	0.00368039	9.95475	7.57996	13.4077	4.06062	3.45297	8.5991	3.16667		A-1C;C118A	3	0	0	NA	5	0	1	0	6	0	3	33.3333	2	0	2	0	1	0	5	0	5	20	5	0	2	0
A-1C;C118G	0.026397	NA	16.5987	NA	100	NA	83.4013	NA	0.25		A-1C;C118G	0	NA	0	NA	0	NA	0	NA	0	NA	1	0	0	NA	1	0	0	NA	0	NA	1	100	0	NA	0	NA
A-1C;C118T	0.00234722	0.00869803	28.6446	22.0164	58.0368	20.6491	29.3922	30.1845	1.41667		A-1C;C118T	4	25	0	NA	0	NA	1	0	1	100	3	0	1	100	1	100	1	0	2	100	1	0	2	50	2	0
A-1C;T119A	0.00171452	0.00269149	17.6809	4.01001	6.95224	2.54494	-10.7287	4.74941	4.58333		A-1C;T119A	2	0	3	0	2	0	5	20	9	11.1111	7	14.2857	7	0	2	0	1	0	3	0	8	0	6	0	2	0
A-1C;T119C	3e-07	0.000113119	12.507	17.7044	20.1423	6.01732	7.63533	18.699	3.66667		A-1C;T119C	3	0	1	0	5	20	3	0	4	25	11	27.2727	2	0	7	0	1	100	2	0	3	66.6667	2	0	10	0
A-1C;T119G	0.0871262	0.168666	22.6808	4.66345	100	76.88	77.3192	77.0213	0.583333		A-1C;T119G	1	0	1	0	1	0	1	0	0	NA	0	NA	0	NA	1	0	0	NA	1	0	0	NA	1	100	0	NA
A-1C;G120A	0.000577356	0.00142884	13.2815	11.2843	42.3553	16.8248	29.0737	20.2586	1.33333		A-1C;G120A	3	0	2	0	1	0	0	NA	3	0	1	100	2	50	1	0	0	NA	0	NA	3	33.3333	0	NA	1	0
A-1C;G120C	3e-07	2.21461e-07	25.0002	0.102392	75.0258	0.0613901	50.0256	0.119385	0.416667		A-1C;G120C	1	0	0	NA	1	100	0	NA	0	NA	1	100	1	100	0	NA	0	NA	0	NA	1	100	0	NA	1	0
A-1C;G120T	3e-07	4.62285e-05	21.4729	18.9236	43.6589	9.81873	22.186	21.3192	2.41667		A-1C;G120T	6	16.6667	1	100	1	100	1	0	1	100	5	40	4	75	0	NA	0	NA	3	0	4	50	3	33.3333	0	NA
A-1C;G121A	0.146015	1.9717	44.3795	12.4505	100	479.049	55.6205	479.211	2.33333		A-1C;G121A	2	100	1	100	2	100	2	0	1	100	5	20	3	66.6667	3	0	2	0	2	50	3	66.6667	2	100	1	0
A-1C;G121C	0.0182774	0.0193753	22.2422	7.0414	90.5566	21.3445	68.3144	22.4759	0.5		A-1C;G121C	0	NA	1	0	1	0	0	NA	1	0	0	NA	0	NA	1	0	0	NA	1	100	0	NA	1	100	0	NA
A-1C;G121T	3e-07	5.52868e-05	87.4952	16.8323	32.3855	14.3548	-55.1096	22.1221	0.75		A-1C;G121T	3	100	0	NA	1	0	0	NA	2	0	1	0	1	100	0	NA	0	NA	1	0	0	NA	0	NA	2	0
A-1C;A122C	9.22612e-05	0.000529677	100	244.09	19.4893	20.6283	-80.5107	244.96	0.333333		A-1C;A122C	0	NA	0	NA	1	100	1	0	0	NA	1	0	0	NA	0	NA	0	NA	0	NA	0	NA	1	0	0	NA
A-1C;A122G	3e-07	6.69966e-05	42.5224	39.9294	28.644	10.1349	-13.8784	41.1956	2.83333		A-1C;A122G	2	50	2	0	5	0	2	50	7	57.1429	4	0	2	50	2	100	5	40	0	NA	2	0	1	0	2	0
A-1C;A122T	0.00091403	0.00312047	39.7101	21.2129	70.5896	14.2123	30.8795	25.5338	4.33333		A-1C;A122T	7	28.5714	1	100	2	50	6	50	5	20	6	66.6667	3	33.3333	3	100	6	100	6	33.3333	2	0	5	60	1	100
A-1C;A123C	0.00670656	0.00983838	18.6241	4.62127	100	44.3759	81.3759	44.6158	0.5		A-1C;A123C	0	NA	1	0	2	0	1	0	0	NA	1	0	0	NA	0	NA	1	100	0	NA	0	NA	0	NA	1	0
A-1C;A123G	0.000714517	0.000918218	23.8668	13.2084	80.3557	10.715	56.4889	17.008	4.08333		A-1C;A123G	6	33.3333	2	0	6	16.6667	3	66.6667	6	33.3333	5	60	5	60	5	100	3	66.6667	0	NA	5	40	3	100	1	0
A-1C;A123T	7.57471e-05	0.000362878	21.4858	29.8038	41.2933	9.53744	19.8075	31.2927	2.33333		A-1C;A123T	1	0	1	0	5	20	2	50	2	50	2	50	4	75	2	0	3	0	1	0	3	33.3333	2	100	2	0
A-1C;A124C	0.17352	8.16156	20.8115	6.7007	100	2354.79	79.1885	2354.8	0.5		A-1C;A124C	1	0	0	NA	0	NA	1	0	0	NA	2	0	0	NA	0	NA	0	NA	0	NA	0	NA	2	50	0	NA
A-1C;A124G	0.017303	0.0526404	80.0308	10.0811	38.4037	47.2249	-41.627	48.2889	1.41667		A-1C;A124G	1	100	0	NA	1	100	0	NA	2	50	3	100	2	100	1	100	3	66.6667	1	0	3	66.6667	0	NA	0	NA
A-1C;A124T	0.00108468	0.00450846	57.4568	13.2831	74.1134	11.5927	16.6566	17.6304	3.91667		A-1C;A124T	2	50	3	66.6667	7	57.1429	4	75	4	75	7	42.8571	4	50	5	100	0	NA	4	75	4	50	3	66.6667	6	16.6667
A-1C;G125A	0.00143145	0.00409748	44.242	16.4354	74.6765	13.8936	30.4345	21.521	3.5		A-1C;G125A	3	66.6667	1	100	3	66.6667	3	0	6	50	4	75	5	60	3	100	4	75	3	100	1	0	6	66.6667	3	100
A-1C;G125C	3e-07	9.44873e-05	25.0241	30.8014	60.3205	18.4805	35.2965	35.9201	0.416667		A-1C;G125C	1	0	0	NA	1	100	0	NA	0	NA	1	100	1	0	0	NA	0	NA	1	100	0	NA	0	NA	2	0
A-1C;G125T	1.51697e-05	8.39198e-05	71.0877	33.7344	38.3444	12.8855	-32.7433	36.1116	2.16667		A-1C;G125T	4	75	1	100	2	0	2	50	3	33.3333	5	60	5	0	1	100	1	100	0	NA	2	100	0	NA	0	NA
A-1C;T126A	0.0242638	0.167107	47.9774	13.8164	100	132.685	52.0226	133.402	1.33333		A-1C;T126A	6	33.3333	0	NA	3	66.6667	0	NA	1	0	2	100	1	0	0	NA	0	NA	1	100	2	100	0	NA	1	0
A-1C;T126C	3e-07	0.0109678	100	2.07415e+06	42.7168	15.8586	-57.2832	2.07415e+06	0.916667		A-1C;T126C	0	NA	1	0	1	0	0	NA	3	0	0	NA	1	0	1	0	0	NA	1	100	2	100	1	100	2	50
A-1C;A127C	NA	NA	NA	NA	NA	NA	NA	NA	0		A-1C;A127C	0	NA	0	NA	0	NA	0	NA	0	NA	0	NA	0	NA	0	NA	0	NA	0	NA	0	NA	0	NA	0	NA
A-1C;A127G	9.08432e-05	8.54434e-05	36.2313	10.1296	86.9545	5.42111	50.7232	11.489	1.41667		A-1C;A127G	5	40	1	0	1	100	1	100	0	NA	3	100	2	100	0	NA	1	100	0	NA	0	NA	3	100	1	0
A-1C;A127T	3e-07	0.000184874	25.0044	42.1529	47.2132	12.7555	22.2088	44.0406	1.83333		A-1C;A127T	1	0	0	NA	2	50	0	NA	2	100	4	0	5	40	1	100	0	NA	1	100	4	75	2	50	1	0
A-1C;A128C	0.0897788	0.344542	76.4745	14.6603	0	147.628	-76.4745	148.354	0.75		A-1C;A128C	0	NA	0	NA	0	NA	0	NA	1	100	1	100	0	NA	1	100	2	50	1	100	1	100	2	0	0	NA
A-1C;A128G	0.001392	0.0063378	30.1149	26.4892	61.2566	30.5888	31.1418	40.4642	2.58333		A-1C;A128G	0	NA	1	0	7	71.4286	6	16.6667	4	0	1	0	4	100	4	25	2	50	0	NA	1	100	1	0	2	0
A-1C;A128T	0.002315	0.00250879	10.9792	14.8361	82.1931	13.1135	71.2138	19.8009	3.91667		A-1C;A128T	1	0	0	NA	2	0	2	0	8	12.5	9	44.4444	6	33.3333	4	50	5	100	1	0	6	83.3333	3	66.6667	3	0
A-1C;A129C	0.000309767	0.000937223	0	46.0247	93.6283	75.0297	93.6283	88.0212	0.75		A-1C;A129C	0	NA	1	0	4	0	1	100	2	50	1	100	0	NA	0	NA	0	NA	0	NA	0	NA	0	NA	0	NA
A-1C;A129G	3e-07	2.28865e-05	74.8916	31.8107	40.2045	10.1911	-34.6871	33.4032	2		A-1C;A129G	1	100	2	0	4	50	0	NA	2	0	4	25	6	33.3333	1	0	2	50	2	100	0	NA	0	NA	1	100
A-1C;A129T	3e-07	2.57551e-05	83.3076	23.5115	49.5292	9.15273	-33.7783	25.2302	2.5		A-1C;A129T	2	100	3	33.3333	5	40	3	33.3333	2	0	1	100	2	100	2	50	5	80	0	NA	1	0	4	25	1	0
A-1C;C130A	7.45351e-06	0.00604675	0	21660.4	33.371	12.3855	33.371	21660.4	1.16667		A-1C;C130A	0	NA	1	0	0	NA	0	NA	0	NA	1	100	3	33.3333	2	50	1	0	0	NA	3	33.3333	3	0	0	NA
A-1C;C130G	0.176511	0.678965	18.7891	4.89206	100	204.443	81.2109	204.502	0.5		A-1C;C130G	1	0	0	NA	0	NA	2	0	0	NA	0	NA	0	NA	0	NA	0	NA	1	0	0	NA	2	50	1	0
A-1C;C130T	1.15665e-05	3.822e-05	49.9618	18.2211	16.6132	4.58196	-33.3486	18.7883	3.5		A-1C;C130T	4	50	1	0	0	NA	7	14.2857	3	33.3333	5	0	7	14.2857	3	0	3	0	3	0	3	0	3	66.6667	2	0
A-1C;A131C	0.000283754	0.00205811	60.5667	30.2631	32.0897	22.2505	-28.477	37.5625	0.666667		A-1C;A131C	1	0	2	100	0	NA	0	NA	1	0	0	NA	0	NA	1	0	0	NA	0	NA	1	100	2	0	0	NA
A-1C;A131G	9.15115e-05	0.000704242	61.7589	25.7742	47.7432	10.3157	-14.0157	27.7619	3.16667		A-1C;A131G	4	50	2	100	1	0	2	50	3	33.3333	4	75	6	33.3333	3	66.6667	6	16.6667	0	NA	6	83.3333	1	0	2	0
A-1C;A131T	0.000185193	0.000904905	47.7133	19.6349	30.0157	11.134	-17.6976	22.572	3.33333		A-1C;A131T	2	0	2	100	6	50	3	33.3333	4	25	9	11.1111	1	0	5	40	4	25	1	0	1	100	2	50	4	25
A-1C;G132A	1.21944e-05	0.000179757	100	786.31	29.5948	10.2382	-70.4052	786.376	2		A-1C;G132A	0	NA	1	100	6	16.6667	3	33.3333	1	0	4	25	3	0	1	100	0	NA	0	NA	3	33.3333	2	50	1	0
A-1C;G132C	0.000967581	0.0080614	39.2887	26.929	60.5908	37.8915	21.302	46.4859	0.666667		A-1C;G132C	1	100	0	NA	2	0	0	NA	0	NA	2	50	1	100	0	NA	0	NA	0	NA	0	NA	2	50	2	0
A-1C;G132T	3e-07	4.66523e-05	12.5072	13.3025	27.2883	5.24706	14.7811	14.3	3.5		A-1C;G132T	3	0	1	0	2	50	4	25	7	14.2857	7	28.5714	1	0	3	0	7	14.2857	1	100	2	50	4	25	2	0
A-1C;A133C	NA	NA	NA	NA	NA	NA	NA	NA	0.25		A-1C;A133C	0	NA	2	0	0	NA	0	NA	0	NA	0	NA	0	NA	0	NA	0	NA	0	NA	1	0	0	NA	0	NA
A-1C;A133G	6.98841e-05	0.000163101	11.1302	20.7083	67.1858	15.3535	56.0557	25.7791	1.58333		A-1C;A133G	3	0	0	NA	1	0	1	0	3	100	6	83.3333	0	NA	0	NA	2	50	2	50	0	NA	1	0	2	0
A-1C;A133T	3e-07	1.70269e-05	74.925	28.8238	33.9767	7.44618	-40.9482	29.7701	2.66667		A-1C;A133T	1	100	2	0	2	50	4	25	4	25	6	33.3333	3	33.3333	2	50	2	0	2	100	1	0	3	0	8	25
A-1C;G134A	0.00546486	0.00961553	88.0299	8.75361	54.3264	10.9923	-33.7035	14.0519	1.25		A-1C;G134A	0	NA	0	NA	0	NA	2	100	3	100	1	100	2	100	0	NA	2	50	0	NA	1	100	4	50	2	0
A-1C;G134C	NA	NA	NA	NA	NA	NA	NA	NA	0.166667		A-1C;G134C	0	NA	0	NA	0	NA	0	NA	0	NA	0	NA	2	100	0	NA	0	NA	0	NA	0	NA	0	NA	0	NA
A-1C;G134T	0.000902865	0.00203936	49.0769	11.3656	74.0278	10.5085	24.9509	15.4792	1.66667		A-1C;G134T	4	75	1	0	0	NA	1	0	3	66.6667	4	75	1	100	1	100	0	NA	3	66.6667	1	100	1	100	2	50
A-1C;A135C	0.004135	0.142276	72.0494	15.8001	68.1092	27.5033	-3.94024	31.7186	1.25		A-1C;A135C	4	100	0	NA	2	0	0	NA	2	100	1	100	1	100	1	100	0	NA	1	0	2	100	1	100	0	NA
A-1C;A135G	5.18113e-05	0.00739461	100	2988.87	74.3842	12.6963	-25.6158	2988.89	1.75		A-1C;A135G	0	NA	0	NA	0	NA	3	100	3	33.3333	2	100	1	100	3	100	2	0	1	100	2	100	4	100	2	50
A-1C;A135T	0.0413715	0.963402	80.1561	7.55284	87.5519	72.7115	7.3958	73.1027	2.91667		A-1C;A135T	1	100	4	100	5	100	4	25	3	33.3333	5	100	3	66.6667	2	100	2	100	1	100	3	100	2	100	3	100
A-1C;G136A	0.00109312	0.00149565	60.7811	11.219	91.9792	4.3015	31.1981	12.0153	1.75		A-1C;G136A	3	66.6667	0	NA	0	NA	2	50	2	100	1	100	2	100	1	100	1	100	0	NA	8	100	1	100	0	NA
A-1C;G136C	NA	NA	NA	NA	NA	NA	NA	NA	0.25		A-1C;G136C	1	100	0	NA	2	50	0	NA	0	NA	0	NA	0	NA	0	NA	0	NA	0	NA	0	NA	0	NA	0	NA
A-1C;G136T	0.00108919	0.00546401	79.0108	7.457	86.8573	5.43091	7.84645	9.22506	1.91667		A-1C;G136T	2	100	2	100	0	NA	2	50	3	100	1	100	0	NA	4	100	3	100	3	100	1	100	2	100	2	0
A-1C;A137C	3e-07	0.00356999	37.5005	35.3562	58.1933	37.4776	20.6928	51.5231	0.5		A-1C;A137C	3	33.3333	0	NA	0	NA	0	NA	0	NA	1	100	1	0	0	NA	0	NA	0	NA	1	100	0	NA	0	NA
A-1C;A137G	8.64294e-06	1.59226e-05	25.8351	22.7037	82.1034	6.10629	56.2683	23.5106	1.83333		A-1C;A137G	1	0	2	100	1	0	1	100	5	80	4	100	2	100	0	NA	3	100	0	NA	2	100	1	100	1	0
A-1C;A137T	8.96543e-06	1.51028e-05	24.1908	25.425	84.7117	5.68947	60.5209	26.0538	2.66667		A-1C;A137T	1	0	5	60	4	100	2	100	4	100	2	100	3	66.6667	1	0	1	100	2	100	1	100	6	100	3	100
A-1C;G138A	0.00103435	0.000941677	37.5745	6.55746	86.5563	5.74306	48.9817	8.71683	1.91667		A-1C;G138A	6	50	1	0	5	40	1	0	0	NA	1	100	1	100	2	100	0	NA	1	100	2	100	3	100	0	NA
A-1C;G138C	0.0012306	0.00312387	18.1236	18.4945	82.3748	7.76838	64.2513	20.0598	0.416667		A-1C;G138C	0	NA	0	NA	1	0	1	0	0	NA	0	NA	0	NA	0	NA	0	NA	2	100	0	NA	1	100	0	NA
A-1C;G138T	0.000479662	0.00141478	69.7804	9.30892	80.395	5.59279	10.6145	10.8598	1.83333		A-1C;G138T	1	100	0	NA	1	100	2	50	6	83.3333	7	85.7143	1	100	0	NA	0	NA	1	100	2	100	1	100	2	100
A-1C;A139C	NA	NA	NA	NA	NA	NA	NA	NA	0.25		A-1C;A139C	0	NA	0	NA	3	100	0	NA	0	NA	0	NA	0	NA	0	NA	0	NA	0	NA	0	NA	0	NA	0	NA
A-1C;A139G	0.0237818	0.0667759	42.6417	11.7887	100	59.8706	57.3583	61.0202	2.08333		A-1C;A139G	1	0	0	NA	4	25	1	100	1	0	1	100	5	60	3	66.6667	4	25	1	100	4	100	0	NA	3	0
A-1C;A139T	0.0002737	0.000218341	2.72007	15.9904	78.6394	5.91651	75.9193	17.0499	1.58333		A-1C;A139T	0	NA	1	0	3	0	0	NA	4	75	4	50	1	100	1	100	1	100	1	100	2	100	1	100	0	NA
A-1C;G140A	0.000611631	0.000466751	6.76422	6.60869	74.7276	9.8225	67.9634	11.8388	4.08333		A-1C;G140A	8	0	5	20	2	0	7	14.2857	2	0	4	75	7	71.4286	3	100	0	NA	3	33.3333	4	75	4	75	4	0
A-1C;G140C	0.00108395	NA	100	NA	49.2748	NA	-50.7252	NA	0.25		A-1C;G140C	0	NA	0	NA	0	NA	0	NA	0	NA	1	100	0	NA	0	NA	0	NA	1	0	1	100	0	NA	1	100
A-1C;G140T	0.000251171	0.000179768	11.1765	15.862	88.8497	6.35693	77.6732	17.0884	1.58333		A-1C;G140T	1	0	0	NA	2	0	2	50	2	50	4	100	0	NA	0	NA	1	100	2	100	2	100	3	100	3	33.3333
A-1C;C141A	3e-07	0.000489662	27.9352	12.9798	40.0935	10.9943	12.1584	17.0102	1.33333		A-1C;C141A	8	25	0	NA	0	NA	1	100	0	NA	2	50	2	50	1	0	0	NA	1	0	1	0	0	NA	0	NA
A-1C;C141G	0.000546267	NA	55.3973	NA	100	NA	44.6027	NA	0.25		A-1C;C141G	1	100	1	0	1	100	0	NA	0	NA	0	NA	0	NA	0	NA	0	NA	0	NA	0	NA	0	NA	0	NA
A-1C;C141T	0.00041452	0.000441752	12.4877	10.8474	67.6718	10.2137	55.1842	14.8992	4.75		A-1C;C141T	4	0	3	0	3	33.3333	6	33.3333	4	75	22	36.3636	5	80	1	100	1	100	2	50	3	100	3	33.3333	3	33.3333
A-1C;G142A	4.1866e-05	6.30102e-05	87.8042	15.4821	24.6911	7.27944	-63.1131	17.108	3.5		A-1C;G142A	3	100	0	NA	4	50	3	33.3333	9	33.3333	5	0	1	0	7	14.2857	0	NA	2	50	4	50	4	50	3	33.3333
A-1C;G142C	NA	NA	NA	NA	NA	NA	NA	NA	0.166667		A-1C;G142C	0	NA	0	NA	0	NA	0	NA	1	0	0	NA	0	NA	0	NA	0	NA	1	0	0	NA	0	NA	0	NA
A-1C;G142T	3e-07	4.11427e-05	12.5023	18.0213	67.5545	9.98779	55.0522	20.6039	1.83333		A-1C;G142T	3	0	0	NA	2	100	1	0	3	33.3333	2	100	0	NA	0	NA	1	100	2	50	3	100	5	60	2	0
A-1C;A143C	NA	NA	NA	NA	NA	NA	NA	NA	0.333333		A-1C;A143C	0	NA	0	NA	1	100	0	NA	3	100	0	NA	0	NA	0	NA	0	NA	0	NA	0	NA	0	NA	0	NA
A-1C;A143G	0.000148467	0.000237419	39.9299	11.7174	76.6334	7.26132	36.7035	13.7849	0.833333		A-1C;A143G	2	50	1	0	3	66.6667	0	NA	0	NA	1	100	1	100	0	NA	0	NA	0	NA	1	100	1	100	0	NA
A-1C;A143T	0.000643003	0.00398983	50.3872	23.322	67.4041	12.1899	17.0169	26.3155	2.16667		A-1C;A143T	1	100	0	NA	2	0	2	100	2	50	2	50	1	100	2	100	4	25	4	75	1	100	5	80	0	NA
A-1C;A144C	0.00311738	0.00376242	13.3026	14.2151	83.2862	18.2961	69.9836	23.1693	0.5		A-1C;A144C	1	0	0	NA	0	NA	0	NA	2	0	1	0	0	NA	1	100	0	NA	0	NA	0	NA	1	100	0	NA
A-1C;A144G	0.00585129	0.0128432	45.6673	13.0754	84.327	19.2395	38.6597	23.2621	2.16667		A-1C;A144G	0	NA	3	33.3333	2	50	7	57.1429	0	NA	1	100	2	0	1	100	3	100	2	100	1	100	4	75	1	0
A-1C;A144T	3e-07	1.9505e-05	25.0335	29.2238	63.1389	9.87374	38.1054	30.8468	1.66667		A-1C;A144T	1	0	2	100	1	0	1	100	1	0	5	80	2	100	3	66.6667	0	NA	0	NA	0	NA	4	50	3	66.6667
A-1C;C145A	0.000106563	0.00031317	14.916	23.194	62.3644	16.0806	47.4484	28.2232	0.75		A-1C;C145A	2	0	0	NA	1	0	0	NA	0	NA	2	100	0	NA	2	50	0	NA	1	0	1	100	0	NA	0	NA
A-1C;C145G	0.000461978	0.0017756	0	179.188	78.9002	9.55909	78.9002	179.443	0.5		A-1C;C145G	0	NA	0	NA	0	NA	0	NA	1	0	1	100	1	100	0	NA	0	NA	1	100	1	100	1	100	1	0
A-1C;C145T	0.00134538	0.00296347	47.0792	9.55311	71.3699	11.0414	24.2906	14.6005	3.08333		A-1C;C145T	6	66.6667	1	0	4	25	3	66.6667	4	50	7	71.4286	4	50	0	NA	3	66.6667	0	NA	2	100	3	66.6667	3	66.6667
A-1C;G146A	0.0329938	0.0936239	56.6491	7.8626	97.6816	38.637	41.0325	39.4289	8.08333		A-1C;G146A	7	85.7143	3	33.3333	9	33.3333	8	37.5	12	33.3333	16	81.25	7	71.4286	4	50	7	57.1429	6	83.3333	7	85.7143	11	90.9091	5	20
A-1C;G146C	3e-07	0.0598299	0.332587	1.18331e+07	59.8543	25.3301	59.5217	1.18331e+07	0.5		A-1C;G146C	0	NA	0	NA	1	100	1	100	0	NA	1	100	0	NA	0	NA	0	NA	0	NA	3	33.3333	0	NA	0	NA
A-1C;G146T	0.151361	20.7791	64.3253	8.9169	100	3671.27	35.6747	3671.28	1.08333		A-1C;G146T	1	100	2	100	2	50	0	NA	2	50	3	66.6667	2	50	0	NA	0	NA	0	NA	1	100	0	NA	2	50
A-1C;T147A	0.233177	63.7527	51.1212	13.7687	0	12853	-51.1212	12853	2.41667		A-1C;T147A	3	100	2	0	1	100	2	0	3	33.3333	6	50	4	75	2	0	5	80	1	0	0	NA	0	NA	1	100
A-1C;T147C	0.00472178	0.00871406	50.5566	5.41211	81.4736	11.1778	30.917	12.4191	2.58333		A-1C;T147C	4	50	1	100	5	40	5	60	7	42.8571	0	NA	0	NA	1	100	4	75	2	100	1	100	1	100	2	0
A-1C;T147G	6.17686e-05	NA	0	NA	77.6167	NA	77.6167	NA	0.25		A-1C;T147G	0	NA	1	0	0	NA	0	NA	0	NA	1	100	1	100	0	NA	0	NA	0	NA	0	NA	0	NA	0	NA
A-1C;G148A	0.0319266	0.0632397	25.5011	9.74626	100	47.8592	74.4989	48.8415	1.83333		A-1C;G148A	3	0	0	NA	0	NA	1	100	5	20	3	33.3333	1	0	1	0	0	NA	3	33.3333	2	100	3	100	1	100
A-1C;G148C	NA	NA	NA	NA	NA	NA	NA	NA	0.0833333		A-1C;G148C	0	NA	0	NA	1	0	0	NA	0	NA	0	NA	0	NA	0	NA	0	NA	0	NA	0	NA	0	NA	0	NA
A-1C;G148T	2.12058e-06	0.00339797	0	120247	80.3685	3.70469	80.3685	120247	0.583333		A-1C;G148T	0	NA	1	100	0	NA	0	NA	0	NA	0	NA	2	100	0	NA	0	NA	1	100	2	100	1	100	1	0
A-1C;G149A	0.201474	0.42464	23.9525	1.23542	100	107.022	76.0475	107.029	0.583333		A-1C;G149A	0	NA	1	0	1	0	0	NA	0	NA	1	0	1	0	0	NA	1	0	0	NA	0	NA	2	50	0	NA
A-1C;G149C	NA	NA	NA	NA	NA	NA	NA	NA	0.333333		A-1C;G149C	2	0	0	NA	0	NA	0	NA	0	NA	0	NA	0	NA	0	NA	0	NA	0	NA	0	NA	2	0	0	NA
A-1C;G149T	6.07239e-06	0.000884421	0	2622.06	21.5952	8.28437	21.5952	2622.08	0.916667		A-1C;G149T	0	NA	2	0	1	0	0	NA	2	0	2	50	0	NA	0	NA	1	0	3	0	0	NA	0	NA	0	NA
A-1C;G150A	0.0412698	0.191502	11.6889	5.93122	39.9734	61.1426	28.2845	61.4296	12.4167		A-1C;G150A	14	14.2857	12	8.33333	17	17.6471	14	14.2857	13	0	18	50	12	25	12	0	14	50	7	14.2857	7	42.8571	9	22.2222	6	16.6667
A-1C;G150C	0.0282812	0.0468469	25.279	8.66716	100	38.8454	74.721	39.8005	1.66667		A-1C;G150C	3	0	1	100	5	20	2	0	0	NA	2	50	0	NA	1	0	1	0	1	100	1	100	3	100	0	NA
A-1C;G150T	0.00382686	0.0054342	40.7415	11.6334	89.6531	11.7738	48.9116	16.5517	5.83333		A-1C;G150T	1	100	1	0	7	57.1429	6	16.6667	10	60	6	33.3333	10	60	6	83.3333	5	60	6	100	5	100	7	57.1429	9	22.2222
A-1C;G151A	0.000376304	0.000316572	44.9562	6.20911	77.7417	3.80951	32.7855	7.2846	18.0833		A-1C;G151A	27	44.4444	11	36.3636	20	60	16	56.25	20	70	37	70.2703	17	58.8235	10	70	19	73.6842	11	81.8182	16	75	13	92.3077	8	62.5
A-1C;G151C	0.00826713	0.0377388	55.7729	11.871	78.7806	23.4236	23.0077	26.26	6.08333		A-1C;G151C	8	62.5	1	0	6	33.3333	6	83.3333	9	44.4444	14	78.5714	9	33.3333	2	50	7	71.4286	2	100	5	100	4	25	0	NA
A-1C;G151T	0.000236846	0.000221815	9.24973	13.4949	70.6991	8.45373	61.4494	15.9241	3.25		A-1C;G151T	3	0	0	NA	2	0	6	33.3333	5	60	8	75	1	0	2	100	2	100	0	NA	6	50	4	75	4	0
A-1C;T152A	0.0067795	0.00797349	32.8926	6.94627	84.0376	14.5617	51.145	16.1336	11.4167		A-1C;T152A	17	23.5294	9	44.4444	15	53.3333	11	27.2727	14	42.8571	21	28.5714	6	16.6667	7	85.7143	9	77.7778	12	66.6667	9	77.7778	7	85.7143	5	40
A-1C;T152C	0.0235007	0.0673777	54.219	5.63363	83.4594	28.1539	29.2405	28.7121	6.91667		A-1C;T152C	11	45.4545	4	75	10	70	5	60	7	57.1429	17	41.1765	9	66.6667	3	33.3333	2	50	3	100	7	71.4286	5	80	3	66.6667
A-1C;T152G	0.00025583	0.000472292	9.7052	9.24344	41.6213	7.75168	31.9161	12.0636	2.41667		A-1C;T152G	3	0	3	0	3	0	0	NA	2	50	5	40	2	0	3	66.6667	1	0	0	NA	4	50	3	33.3333	0	NA
A-1C;T153A	0.000206796	0.000773686	40.0721	8.07375	49.6493	5.01008	9.57726	9.50192	22.8333		A-1C;T153A	31	45.1613	17	35.2941	29	31.0345	16	68.75	33	45.4545	41	51.2195	25	36	13	46.1538	21	52.381	11	54.5455	21	42.8571	16	62.5	12	16.6667
A-1C;T153C	0.220064	36.2607	57.1916	4.86332	53.9874	383.655	-3.20417	383.686	21.6667		A-1C;T153C	35	65.7143	13	30.7692	24	58.3333	21	61.9048	23	56.5217	31	45.1613	21	76.1905	20	45	16	56.25	10	80	24	45.8333	22	59.0909	12	25
A-1C;T153G	9.06803e-05	0.000637609	20.1423	18.7671	31.0804	8.51873	10.9381	20.61	9.5		A-1C;T153G	13	23.0769	4	0	11	27.2727	12	33.3333	12	33.3333	19	26.3158	12	25	5	40	2	0	11	63.6364	6	83.3333	7	0	4	100
A-1C;T154A	0.00317415	0.00713405	53.6792	5.69542	69.9846	7.60746	16.3054	9.50322	13.5		A-1C;T154A	14	50	9	55.5556	13	61.5385	16	50	15	66.6667	22	50	15	53.3333	8	87.5	17	58.8235	13	69.2308	10	80	10	60	7	42.8571
A-1C;T154C	0.00201706	0.00210029	3.90177	3.06426	31.5254	8.45684	27.6237	8.99488	20.75		A-1C;T154C	26	3.84615	18	5.55556	31	12.9032	25	0	38	15.7895	43	16.2791	12	8.33333	16	43.75	11	27.2727	9	22.2222	11	27.2727	9	22.2222	13	0
A-1C;T154G	0.00659162	0.0100698	8.90237	8.48455	64.0781	26.229	55.1757	27.5671	5.41667		A-1C;T154G	5	0	4	25	7	14.2857	9	11.1111	6	16.6667	10	0	8	50	2	100	6	33.3333	4	50	3	33.3333	1	100	3	0
A-1C;G155A	0.00219415	0.00325833	70.1944	6.16498	91.7555	4.60904	21.5611	7.69741	25.4167		A-1C;G155A	21	80.9524	14	57.1429	33	60.6061	18	77.7778	46	82.6087	31	61.2903	21	80.9524	20	95	21	76.1905	20	95	34	91.1765	26	92.3077	14	57.1429
A-1C;G155C	0.000772398	0.00537615	83.3729	15.0782	70.2928	15.1895	-13.0801	21.4026	4.58333		A-1C;G155C	5	40	3	33.3333	9	100	2	50	6	83.3333	10	80	8	50	1	0	3	66.6667	4	100	3	100	1	0	4	50
A-1C;G155T	0.000827988	0.00360572	75.3253	17.1206	48.8847	17.1644	-26.4406	24.2432	1.66667		A-1C;G155T	3	66.6667	1	0	4	100	1	100	1	100	2	50	0	NA	2	0	0	NA	1	100	4	50	1	100	2	100
A-1C;T156A	0.000157002	0.000275045	48.8334	5.99112	62.7753	3.04834	13.9419	6.72204	24.8333		A-1C;T156A	27	51.8519	25	48	23	52.1739	25	52	41	65.8537	26	57.6923	28	71.4286	11	72.7273	19	63.1579	22	59.0909	23	65.2174	28	50	15	46.6667
A-1C;T156C	0.0375934	0.169407	23.8753	3.63576	40.5791	30.3067	16.7038	30.524	11.25		A-1C;T156C	14	21.4286	8	25	12	16.6667	11	36.3636	24	16.6667	23	26.087	8	50	8	12.5	10	20	3	33.3333	4	50	10	30	16	6.25
A-1C;T156G	3e-07	3.82131e-05	89.9958	11.0039	38.8826	9.29096	-51.1132	14.4016	1.58333		A-1C;T156G	4	100	0	NA	3	33.3333	2	0	0	NA	3	33.3333	1	100	0	NA	1	0	0	NA	2	50	3	33.3333	1	100
A-1C;T157A	0.00180195	0.00262447	18.2935	16.2532	84.1311	15.1217	65.8376	22.1998	1.91667		A-1C;T157A	0	NA	4	0	1	100	0	NA	3	33.3333	2	0	1	100	2	100	0	NA	3	100	3	100	4	50	1	100
A-1C;T157C	NA	NA	NA	NA	NA	NA	NA	NA	0.166667		A-1C;T157C	0	NA	1	0	1	0	0	NA	0	NA	0	NA	0	NA	0	NA	0	NA	0	NA	0	NA	0	NA	1	0
A-1C;T157G	NA	NA	NA	NA	NA	NA	NA	NA	0.166667		A-1C;T157G	0	NA	0	NA	1	0	0	NA	0	NA	1	0	0	NA	0	NA	0	NA	0	NA	0	NA	0	NA	1	0
A-1C;C158A	0.000786005	0.00172916	60.7832	8.47678	78.1358	5.59344	17.3525	10.1559	17.8333		A-1C;C158A	16	75	7	71.4286	24	41.6667	14	71.4286	18	72.2222	32	68.75	19	78.9474	11	81.8182	12	91.6667	14	78.5714	14	85.7143	33	63.6364	20	75
A-1C;C158G	3e-07	5.74336e-05	50.0925	30.0236	66.1626	11.8115	16.0701	32.2634	1.58333		A-1C;C158G	4	50	2	100	1	100	0	NA	3	100	2	0	3	33.3333	1	100	0	NA	0	NA	1	100	2	100	4	75
A-1C;C158T	0.0528431	0.203816	64.469	6.73769	100	58.522	35.531	58.9086	11.5		A-1C;C158T	11	45.4545	8	75	18	83.3333	14	64.2857	10	60	22	68.1818	9	22.2222	7	85.7143	14	78.5714	7	57.1429	12	83.3333	6	100	10	90
A-1C;T159A	0.00469252	0.0376708	87.0314	6.4292	80.7858	11.1125	-6.24554	12.8383	15.0833		A-1C;T159A	19	68.4211	12	91.6667	13	84.6154	12	50	15	100	26	84.6154	23	82.6087	12	75	12	75	9	88.8889	15	86.6667	13	84.6154	13	84.6154
A-1C;T159C	5.74983e-05	0.000331425	42.5673	35.2119	62.2646	10.2332	19.6973	36.6687	6.66667		A-1C;T159C	5	40	4	50	12	58.3333	5	60	7	28.5714	16	75	9	88.8889	4	0	3	66.6667	4	100	7	42.8571	4	75	2	100
A-1C;T159G	0.00134383	0.00970986	45.6944	24.4509	27.8864	29.0412	-17.808	37.9637	1.41667		A-1C;T159G	3	33.3333	0	NA	2	0	1	100	2	100	2	50	4	0	0	NA	1	0	1	100	1	0	0	NA	1	0
A-1C;C160A	0.000653104	0.00129537	78.7353	6.07955	91.7448	3.8783	13.0095	7.21125	16.9167		A-1C;C160A	20	75	15	93.3333	20	70	8	50	26	84.6154	27	92.5926	17	94.1176	10	90	15	86.6667	9	100	20	95	16	87.5	7	100
A-1C;C160G	0.00042322	0.000986774	89.8147	15.0582	55.5896	11.2266	-34.2251	18.7826	3.08333		A-1C;C160G	2	50	3	100	6	100	5	80	3	66.6667	4	50	5	60	2	50	1	0	1	0	3	100	2	50	0	NA
A-1C;C160T	0.0660658	0.398374	86.1937	3.72258	100	44.4818	13.8063	44.6373	9.08333		A-1C;C160T	7	100	5	80	19	89.4737	5	100	8	87.5	16	87.5	9	77.7778	8	75	4	50	10	100	8	100	10	90	5	100
A-1C;T161A	0.0655894	0.243618	80.8642	2.80762	100	29.5045	19.1358	29.6378	13.75		A-1C;T161A	21	85.7143	8	75	16	87.5	11	90.9091	13	84.6154	24	79.1667	12	83.3333	11	81.8182	14	78.5714	12	75	9	77.7778	14	100	7	71.4286
A-1C;T161C	10	419018	83.4731	6.37735	100	687058	16.5269	687058	6.41667		A-1C;T161C	4	50	4	75	6	100	2	100	8	100	16	68.75	7	42.8571	8	87.5	2	100	8	100	7	71.4286	5	60	7	85.7143
A-1C;T161G	2.68444e-05	0.000551766	100	380.752	66.1825	18.836	-33.8175	381.218	0.583333		A-1C;T161G	0	NA	2	100	1	100	0	NA	0	NA	1	0	1	100	0	NA	2	100	0	NA	0	NA	0	NA	1	100
A-1C;C162A	3e-07	0.000103022	94.4414	6.72068	90.4445	3.27947	-3.99689	7.47813	5.5		A-1C;C162A	8	100	3	100	9	88.8889	3	100	7	100	9	100	0	NA	5	60	6	100	3	66.6667	8	100	5	80	3	66.6667
A-1C;C162G	NA	NA	NA	NA	NA	NA	NA	NA	0.25		A-1C;C162G	0	NA	0	NA	0	NA	0	NA	0	NA	0	NA	0	NA	0	NA	0	NA	2	100	0	NA	1	100	1	0
A-1C;C162T	0.0186982	0.038111	78.8007	4.06853	97.6223	9.54983	18.8216	10.3804	4.41667		A-1C;C162T	3	100	3	100	5	80	4	75	8	87.5	7	57.1429	2	100	0	NA	3	100	5	100	5	100	8	100	3	66.6667
A-1C;T163A	0.00648254	0.0245162	65.5168	8.41379	83.6026	13.5701	18.0858	15.9668	4.25		A-1C;T163A	5	80	5	60	6	66.6667	2	50	3	100	8	37.5	2	100	2	100	3	66.6667	2	100	10	90	3	66.6667	1	100
A-1C;T163C	0.00713595	0.0294955	75.1865	9.97712	88.7901	14.4499	13.6036	17.5597	1.83333		A-1C;T163C	3	100	0	NA	0	NA	0	NA	3	66.6667	4	50	2	100	3	100	3	100	1	100	0	NA	3	100	2	100
A-1C;T163G	NA	NA	NA	NA	NA	NA	NA	NA	0.166667		A-1C;T163G	0	NA	0	NA	0	NA	1	100	0	NA	1	0	0	NA	0	NA	0	NA	0	NA	0	NA	0	NA	0	NA
A-1C;T164A	9.62615e-05	9.24005e-05	23.0868	15.6265	82.7141	6.30042	59.6273	16.8488	2.66667		A-1C;T164A	3	33.3333	2	0	2	50	5	80	3	100	7	71.4286	2	50	0	NA	1	100	1	100	3	100	3	100	0	NA
A-1C;T164C	0.0109124	0.0378822	25.8138	10.5969	60.7873	36.5202	34.9736	38.0266	3.25		A-1C;T164C	5	0	4	25	5	20	3	66.6667	4	75	3	66.6667	4	0	2	50	3	33.3333	1	100	4	75	1	0	0	NA
A-1C;T165A	3e-07	9.23075e-05	25.024	34.5818	65.7637	19.4197	40.7397	39.6613	0.5		A-1C;T165A	1	0	0	NA	1	100	0	NA	2	100	0	NA	0	NA	0	NA	1	0	1	100	0	NA	0	NA	2	100
A-1C;T165C	1.60496e-05	0.000177923	49.9403	7.70704	57.9988	5.80171	8.05844	9.64668	2.08333		A-1C;T165C	8	50	0	NA	4	50	1	100	3	66.6667	3	66.6667	0	NA	4	50	0	NA	0	NA	2	50	0	NA	3	66.6667
A-1C;T165G	6.13442e-06	NA	0	NA	80.8315	NA	80.8315	NA	0.333333		A-1C;T165G	0	NA	0	NA	1	100	0	NA	2	100	1	100	0	NA	0	NA	0	NA	0	NA	0	NA	0	NA	0	NA
A-1C;A166C	NA	NA	NA	NA	NA	NA	NA	NA	0.0833333		A-1C;A166C	1	100	0	NA	0	NA	0	NA	0	NA	0	NA	0	NA	0	NA	0	NA	0	NA	0	NA	0	NA	0	NA
A-1C;A166G	0.0013659	0.0113437	50.0744	25.3714	63.054	20.1907	12.9796	32.4249	1		A-1C;A166G	1	100	0	NA	0	NA	1	0	2	50	1	0	2	100	1	100	0	NA	0	NA	1	100	3	33.3333	1	0
A-1C;T167A	0.000514515	0.000472246	18.2317	16.5261	100	10.9453	81.7683	19.822	2.25		A-1C;T167A	1	0	3	33.3333	5	20	2	0	1	100	4	100	1	100	3	100	2	100	3	100	2	50	0	NA	0	NA
A-1C;T167C	7.69755e-05	0.000174369	27.822	21.3973	71.5284	10.4687	43.7065	23.821	1.41667		A-1C;T167C	4	25	0	NA	1	0	1	100	3	100	1	0	1	100	1	0	1	100	1	100	2	100	1	100	1	0
A-1C;T167G	0.00351795	0.0111857	0	76.0465	88.3443	47.3339	88.3443	89.5744	0.416667		A-1C;T167G	0	NA	0	NA	0	NA	0	NA	0	NA	2	0	1	0	1	100	0	NA	1	100	0	NA	0	NA	0	NA
A-1C;T168A	0.00266113	0.00382119	24.9629	11.3839	91.992	10.0898	67.0291	15.2117	2.08333		A-1C;T168A	2	50	3	0	2	50	2	0	0	NA	1	100	0	NA	2	50	2	100	2	50	7	100	2	100	3	66.6667
A-1C;T168C	0.00941322	0.0206261	36.6401	13.8984	88.9307	37.405	52.2906	39.9036	1.33333		A-1C;T168C	2	50	0	NA	1	0	0	NA	3	33.3333	1	100	2	0	4	75	1	100	1	100	1	100	0	NA	1	100
A-1C;T168G	0.000765295	0.00534949	23.3297	31.4283	54.8891	27.7968	31.5594	41.9572	1		A-1C;T168G	1	100	0	NA	4	0	0	NA	0	NA	1	100	1	0	1	100	0	NA	2	100	2	0	0	NA	1	0
A-1C;T169A	1.39782	727.559	64.5749	9.51863	100	17304.6	35.4251	17304.6	2.83333		A-1C;T169A	3	33.3333	0	NA	3	100	1	0	5	80	1	100	5	80	0	NA	2	50	1	0	8	62.5	5	80	2	100
A-1C;T169C	0.000508924	0.00157225	69.4882	10.4901	85.3889	8.16284	15.9007	13.2919	1.58333		A-1C;T169C	2	100	1	100	3	33.3333	1	100	2	100	3	100	1	100	0	NA	3	100	1	100	2	100	0	NA	0	NA
A-1C;T169G	0.137315	1.74981	68.4634	9.42874	100	238.604	31.5366	238.79	1.16667		A-1C;T169G	0	NA	1	100	0	NA	1	100	1	100	1	0	1	100	2	100	1	100	1	100	2	50	3	100	0	NA
A-1C;T170A	6.43816e-05	7.40988e-05	10.6881	16.7012	74.1723	7.6283	63.4842	18.3609	3.83333		A-1C;T170A	3	0	5	20	4	50	3	66.6667	3	100	6	33.3333	5	60	0	NA	4	100	2	100	2	100	9	55.5556	0	NA
A-1C;T170C	0.0264978	0.133892	73.0111	6.81337	87.3308	24.2163	14.3197	25.1566	0.916667		A-1C;T170C	1	100	0	NA	1	100	0	NA	2	100	2	50	0	NA	0	NA	1	100	2	100	0	NA	2	100	1	0
A-1C;T170G	0.00416729	0.0146634	100	99.3274	7.84785	41.4535	-92.1522	107.631	0.666667		A-1C;T170G	0	NA	0	NA	0	NA	0	NA	0	NA	3	66.6667	2	100	1	0	0	NA	0	NA	2	0	0	NA	0	NA
A-1C;T171A	2.90334e-05	5.53088e-05	74.0254	7.94614	85.7129	2.02488	11.6875	8.20008	2.5		A-1C;T171A	1	100	1	100	8	87.5	3	100	1	100	4	100	2	100	4	100	1	100	2	100	1	100	2	100	3	100
A-1C;T171C	0.00121672	0.00325574	5.17181	3.62361	15.8493	5.94838	10.6775	6.96518	4.41667		A-1C;T171C	9	0	3	0	8	0	8	0	7	0	4	25	0	NA	4	0	2	0	1	0	5	0	2	50	7	0
A-1C;T171G	4.44712e-05	0.000134514	54.7394	31.0821	89.9712	18.389	35.2318	36.1144	1.08333		A-1C;T171G	3	66.6667	1	0	4	100	0	NA	0	NA	3	100	0	NA	2	100	0	NA	0	NA	0	NA	0	NA	2	0
A-1C;T172A	0.000424235	0.00787833	72.8329	18.3452	76.5836	11.9964	3.7507	21.9194	1		A-1C;T172A	1	100	0	NA	2	100	1	0	3	100	1	100	0	NA	1	100	0	NA	1	100	1	100	1	100	0	NA
A-1C;T172C	0.00178752	0.00265502	22.4903	8.20895	56.1612	12.166	33.671	14.6765	5.75		A-1C;T172C	3	0	3	0	5	20	13	53.8462	10	20	13	30.7692	10	40	1	100	1	0	2	50	3	66.6667	5	60	6	33.3333
A-1C;T172G	0.000486815	0.0012401	0	78.2973	84.7284	20.4217	84.7284	80.9167	0.5		A-1C;T172G	0	NA	0	NA	0	NA	1	0	0	NA	2	50	2	100	0	NA	0	NA	0	NA	0	NA	1	100	0	NA
A-1C;T173A	0.00371412	0.00814861	74.8853	6.39063	90.1322	6.43232	15.2468	9.06725	1.75		A-1C;T173A	2	100	0	NA	1	100	1	100	2	50	2	100	2	100	2	100	4	100	1	100	0	NA	4	100	1	100
A-1C;T173C	5.86841e-06	3.34668e-05	49.9726	22.5887	78.2233	5.68973	28.2507	23.2943	2.58333		A-1C;T173C	2	50	1	100	2	50	4	100	2	100	4	75	0	NA	1	100	2	100	4	100	3	66.6667	6	50	2	0
A-1C;T173G	NA	NA	NA	NA	NA	NA	NA	NA	0.166667		A-1C;T173G	0	NA	0	NA	0	NA	0	NA	0	NA	1	100	0	NA	0	NA	0	NA	1	0	0	NA	0	NA	0	NA
A-1G;T1A	0.00103336	0.000399722	9.14011	3.15641	65.483	4.86115	56.3429	5.79601	21.1667		A-1G;T1A	26	11.5385	16	6.25	33	15.1515	20	10	33	24.2424	39	46.1538	17	52.9412	17	58.8235	13	69.2308	9	77.7778	16	56.25	15	53.3333	18	5.55556
A-1G;T1C	0.000596106	0.000480213	14.1429	8.72741	80.3325	8.12738	66.1896	11.9257	9.91667		A-1G;T1C	15	13.3333	11	18.1818	12	16.6667	5	20	13	46.1538	12	33.3333	6	100	7	85.7143	12	58.3333	7	71.4286	10	70	9	88.8889	8	0
A-1G;T1G	0.00965849	0.0067786	11.0587	3.05435	92.7696	19.4793	81.7109	19.7173	1.58333		A-1G;T1G	3	0	3	0	3	0	4	0	2	0	1	0	0	NA	1	0	1	100	0	NA	1	100	0	NA	1	0
A-1G;C2A	0.000674469	0.00103318	11.9987	8.34155	44.7713	9.5159	32.7726	12.6544	12.0833		A-1G;C2A	17	11.7647	12	16.6667	15	6.66667	11	27.2727	18	22.2222	25	32	5	60	2	0	10	80	6	33.3333	18	22.2222	6	66.6667	5	0
A-1G;C2G	0.000122247	0.000533227	17.9544	35.7593	50.3638	17.8225	32.4095	39.9546	1.08333		A-1G;C2G	1	0	1	0	2	0	0	NA	4	75	0	NA	0	NA	0	NA	0	NA	2	0	1	0	2	100	1	0
A-1G;C2T	0.000231909	0.000300218	2.8256	6.70868	38.1694	9.51199	35.3438	11.6398	9.16667		A-1G;C2T	14	0	10	10	21	4.7619	7	57.1429	7	14.2857	13	46.1538	9	33.3333	9	44.4444	4	75	6	66.6667	5	40	5	0	8	12.5
A-1G;T3A	0.000756967	0.000796266	7.84179	8.21656	50.1694	8.44524	42.3276	11.7828	12		A-1G;T3A	10	20	4	0	20	10	16	6.25	24	25	15	46.6667	12	58.3333	7	42.8571	7	28.5714	11	72.7273	11	27.2727	7	42.8571	4	0
A-1G;T3C	0.000420259	0.000490073	7.26988	4.14565	29.7583	4.88022	22.4884	6.40336	13.25		A-1G;T3C	22	9.09091	10	0	16	12.5	14	7.14286	16	31.25	20	20	10	30	7	28.5714	3	33.3333	15	13.3333	11	36.3636	15	40	13	15.3846
A-1G;T3G	0.000195525	0.00653206	18.6277	6.48926	17.6379	7.07492	-0.989801	9.60026	0.833333		A-1G;T3G	2	0	0	NA	1	0	1	0	3	0	2	0	0	NA	0	NA	0	NA	1	0	0	NA	0	NA	1	0
A-1G;A4C	0.102567	0.276156	15.3574	4.75542	100	128.835	84.6426	128.923	2.5		A-1G;A4C	1	0	2	0	3	0	1	0	5	0	5	40	1	0	0	NA	3	0	0	NA	4	50	5	60	2	50
A-1G;A4G	0.0145596	0.0124338	13.7001	3.83868	85.2638	18.2396	71.5637	18.6391	7.25		A-1G;A4G	13	15.3846	3	33.3333	7	0	9	11.1111	12	8.33333	15	26.6667	6	33.3333	4	50	5	20	3	66.6667	5	80	5	80	9	33.3333
A-1G;A4T	0.000369381	0.00019986	5.53519	3.04204	44.0774	4.31383	38.5422	5.27855	20.8333		A-1G;A4T	16	0	21	14.2857	38	15.7895	31	19.3548	26	23.0769	19	26.3158	23	47.8261	12	25	10	50	14	57.1429	22	40.9091	18	44.4444	10	20
A-1G;G5A	0.00468625	0.00367704	14.6125	3.45994	61.2154	9.21289	46.6029	9.84117	13.1667		A-1G;G5A	15	6.66667	5	20	28	17.8571	17	11.7647	21	19.0476	7	42.8571	13	30.7692	13	30.7692	15	46.6667	6	50	9	77.7778	9	44.4444	9	0
A-1G;G5C	7.04586e-05	0.00301116	17.118	15.5534	15.2793	9.06414	-1.83864	18.0018	4.66667		A-1G;G5C	14	14.2857	3	0	11	27.2727	3	0	1	0	10	0	5	0	3	66.6667	2	0	0	NA	2	100	2	0	1	0
A-1G;G5T	0.0020067	0.00211719	4.12965	4.35687	41.8549	8.93218	37.7252	9.93812	7.33333		A-1G;G5T	10	0	3	0	11	0	7	14.2857	6	0	10	10	6	33.3333	2	0	10	70	3	33.3333	8	37.5	12	25	5	0
A-1G;T6A	0.00196716	0.000933019	14.0411	3.6463	77.5763	5.98618	63.5353	7.00927	14.6667		A-1G;T6A	25	8	10	10	22	22.7273	13	30.7692	16	25	24	41.6667	9	55.5556	16	50	13	53.8462	6	83.3333	10	90	12	75	13	23.0769
A-1G;T6C	0.00120599	0.000581169	3.4151	2.52762	56.4253	6.22966	53.0102	6.72291	18.6667		A-1G;T6C	30	3.33333	16	0	29	10.3448	17	5.88235	21	9.52381	22	45.4545	23	47.8261	9	33.3333	14	57.1429	14	57.1429	21	57.1429	8	37.5	11	18.1818
A-1G;T6G	0.0325501	0.0545606	20.2582	8.71216	100	45.307	79.7418	46.1371	0.833333		A-1G;T6G	0	NA	1	0	1	0	2	0	1	0	0	NA	0	NA	0	NA	0	NA	1	0	2	100	2	100	0	NA
A-1G;T7A	0.000195497	0.000103782	1.5124	1.7348	44.9398	4.40483	43.4274	4.73414	19.75		A-1G;T7A	36	0	19	5.26316	32	18.75	13	23.0769	18	27.7778	26	34.6154	16	25	12	33.3333	12	66.6667	21	57.1429	13	38.4615	19	47.3684	12	0
A-1G;T7C	0.000646941	0.000452746	4.68638	3.15076	39.9134	5.06329	35.2271	5.96357	19.8333		A-1G;T7C	33	9.09091	16	0	25	8	22	9.09091	19	15.7895	30	36.6667	16	43.75	6	16.6667	16	37.5	18	33.3333	18	27.7778	19	52.6316	16	6.25
A-1G;T7G	0.00069015	0.00104651	16.4994	12.113	67.0284	15.1242	50.5291	19.377	4		A-1G;T7G	9	11.1111	2	50	6	16.6667	7	14.2857	5	40	7	42.8571	3	100	2	0	1	100	2	100	4	50	0	NA	3	33.3333
A-1G;G8A	0.0491728	0.0837921	4.73833	3.08064	82.8854	64.5536	78.1471	64.627	16.75		A-1G;G8A	30	10	14	21.4286	33	0	13	7.69231	17	11.7647	17	17.6471	12	58.3333	10	0	14	21.4286	8	37.5	18	38.8889	15	60	8	12.5
A-1G;G8C	0.00357604	0.00607585	13.9204	6.28934	56.0225	14.4792	42.1021	15.7862	1.91667		A-1G;G8C	2	0	3	0	2	0	4	25	4	0	0	NA	2	50	0	NA	0	NA	3	33.3333	3	66.6667	0	NA	1	0
A-1G;G8T	3e-07	2.42611e-05	3.57188	4.28849	21.2117	3.44565	17.6398	5.50124	10.4167		A-1G;G8T	13	0	5	20	13	15.3846	13	15.3846	11	36.3636	19	21.0526	7	42.8571	6	0	9	33.3333	8	12.5	9	22.2222	12	16.6667	2	0
A-1G;A9C	3e-07	5.77617e-05	37.492	17.3211	26.1216	6.73544	-11.3704	18.5846	1.5		A-1G;A9C	3	33.3333	1	0	2	50	4	0	1	0	1	0	2	50	2	50	0	NA	0	NA	1	0	1	0	0	NA
A-1G;A9G	0.00426816	0.0112395	4.78997	4.16811	21.7018	10.4516	16.9119	11.2521	17.3333		A-1G;A9G	25	8	10	10	31	3.22581	20	15	25	0	21	28.5714	15	26.6667	7	0	10	40	12	25	14	7.14286	18	27.7778	17	5.88235
A-1G;A9T	0.000529433	0.000227971	3.95127	1.62589	32.6654	2.64352	28.7141	3.1035	24.4167		A-1G;A9T	35	2.85714	13	7.69231	28	3.57143	20	15	31	19.3548	49	22.449	28	28.5714	10	30	19	31.5789	11	18.1818	32	37.5	17	29.4118	16	12.5
A-1G;A10C	0.00032494	0.000313883	1.09199	8.25228	56.7217	13.0489	55.6297	15.4393	4.41667		A-1G;A10C	8	0	4	0	9	0	7	14.2857	8	62.5	4	75	3	66.6667	0	NA	0	NA	2	0	3	66.6667	5	60	2	0
A-1G;A10G	0.000749312	0.000462114	4.22747	4.28462	58.827	7.31941	54.5995	8.48126	12.4167		A-1G;A10G	22	4.54545	6	0	19	5.26316	14	14.2857	16	12.5	11	63.6364	12	66.6667	6	66.6667	12	50	8	62.5	15	46.6667	8	50	10	10
A-1G;A10T	0.000502046	0.000243326	1.52772	3.40725	68.2342	5.96285	66.7065	6.86767	29.25		A-1G;A10T	42	7.14286	28	0	41	21.9512	33	21.2121	32	28.125	40	55	24	62.5	14	64.2857	24	75	12	83.3333	34	64.7059	27	48.1481	16	6.25
A-1G;G11A	0.00333093	0.00419624	3.96649	4.52105	45.0241	12.0146	41.0576	12.8371	11		A-1G;G11A	23	17.3913	7	0	17	0	10	20	15	0	12	25	5	20	5	60	6	33.3333	9	66.6667	11	27.2727	12	33.3333	10	30
A-1G;G11C	0.0376383	0.0524483	15.2771	7.13634	100	48.1734	84.7229	48.6991	2.5		A-1G;G11C	1	0	3	0	1	0	2	0	2	0	2	0	2	50	3	0	0	NA	7	28.5714	3	100	4	75	2	0
A-1G;G11T	0.000731002	0.000516679	4.85204	3.70583	43.0326	6.17598	38.1805	7.2025	16.6667		A-1G;G11T	28	3.57143	11	9.09091	19	10.5263	10	0	23	17.3913	29	41.3793	18	38.8889	8	37.5	7	57.1429	10	50	20	45	17	23.5294	6	0
A-1G;A12C	7.54657e-05	0.000113878	5.78981	7.581	37.31	8.61738	31.5202	11.4774	3		A-1G;A12C	7	0	3	0	7	14.2857	4	50	4	50	3	0	1	0	1	100	2	50	3	33.3333	0	NA	1	0	1	100
A-1G;A12G	0.000996037	0.000927877	14.2624	8.45107	71.459	8.42704	57.1965	11.9346	6.25		A-1G;A12G	5	20	6	16.6667	12	8.33333	5	20	10	50	9	33.3333	3	66.6667	2	50	6	83.3333	2	100	8	37.5	7	85.7143	9	0
A-1G;A12T	0.00970916	0.0135551	11.1668	2.4234	35.1463	9.1469	23.9795	9.46249	27.0833		A-1G;A12T	34	5.88235	19	5.26316	47	19.1489	26	7.69231	45	13.3333	37	16.2162	23	26.087	13	7.69231	9	33.3333	17	17.6471	28	35.7143	27	33.3333	14	7.14286
A-1G;G13A	0.000977505	0.00114332	2.24989	3.70945	25.2686	6.78005	23.0187	7.72845	30.0833		A-1G;G13A	44	2.27273	21	14.2857	42	4.7619	27	0	53	9.43396	38	23.6842	34	32.3529	20	30	11	36.3636	15	26.6667	30	40	26	7.69231	19	5.26316
A-1G;G13C	7.34648e-06	9.55444e-05	20.8071	12.0836	13.2432	4.57701	-7.56384	12.9214	5.08333		A-1G;G13C	11	18.1818	3	0	7	14.2857	5	20	7	0	7	0	3	66.6667	1	0	4	0	6	16.6667	2	50	5	0	4	25
A-1G;G13T	3e-07	4.32885e-05	23.3113	13.708	11.4187	4.39033	-11.8926	14.3939	10.4167		A-1G;G13T	14	21.4286	7	28.5714	14	0	10	0	14	7.14286	20	15	14	7.14286	5	40	7	14.2857	8	25	6	33.3333	6	33.3333	8	0
A-1G;T14A	0.000399289	0.00032954	3.17876	3.33226	38.6059	6.53227	35.4271	7.33311	13.5833		A-1G;T14A	21	0	8	12.5	24	12.5	12	8.33333	22	18.1818	14	21.4286	7	71.4286	13	53.8462	5	40	3	33.3333	24	25	10	40	9	0
A-1G;T14C	0.00151436	0.000654883	6.88929	2.64267	65.0154	5.53878	58.1261	6.13692	8.58333		A-1G;T14C	17	5.88235	7	0	11	9.09091	12	8.33333	11	18.1818	9	33.3333	6	33.3333	7	71.4286	4	75	6	50	6	50	7	71.4286	9	0
A-1G;T14G	0.00261207	0.00394982	9.15942	12.2764	67.1925	22.0761	58.0331	25.2599	1		A-1G;T14G	0	NA	0	NA	4	0	1	0	0	NA	2	0	2	50	1	100	1	0	0	NA	0	NA	1	100	0	NA
A-1G;A15C	0.0286588	0.195137	51.9821	15.7337	6.70333	75.7611	-45.2787	77.3776	0.666667		A-1G;A15C	1	0	1	100	0	NA	1	100	0	NA	1	0	0	NA	2	50	0	NA	0	NA	0	NA	2	0	0	NA
A-1G;A15G	0.000293066	0.000257322	1.30072	6.92337	45.018	6.27217	43.7173	9.34201	8.58333		A-1G;A15G	4	0	9	0	8	0	13	23.0769	12	33.3333	9	33.3333	17	47.0588	7	71.4286	6	16.6667	4	50	5	40	9	33.3333	5	0
A-1G;A15T	0.00028311	0.000234695	1.13778	3.96689	43.4482	7.83578	42.3105	8.78269	21.3333		A-1G;A15T	28	0	21	9.52381	29	3.44828	18	16.6667	30	40	42	47.619	10	60	13	53.8462	12	8.33333	21	52.381	14	28.5714	18	55.5556	16	12.5
A-1G;T16A	0.00130483	0.000824468	5.38083	3.53599	55.0787	6.72918	49.6979	7.60165	18.0833		A-1G;T16A	23	4.34783	14	0	21	14.2857	16	6.25	27	29.6296	28	32.1429	14	21.4286	6	50	12	50	16	31.25	21	66.6667	19	63.1579	8	0
A-1G;T16C	0.000448841	0.000410302	9.3098	4.57254	43.7919	5.22412	34.4821	6.94259	8		A-1G;T16C	15	6.66667	4	0	7	14.2857	7	14.2857	6	16.6667	10	50	7	28.5714	8	25	9	55.5556	6	50	7	57.1429	10	30	7	0
A-1G;T16G	NA	NA	NA	NA	NA	NA	NA	NA	0.333333		A-1G;T16G	0	NA	0	NA	2	0	0	NA	2	50	0	NA	0	NA	0	NA	0	NA	0	NA	0	NA	0	NA	1	0
A-1G;A17C	0.00401934	NA	20.7971	NA	100	NA	79.2029	NA	0.416667		A-1G;A17C	0	NA	0	NA	0	NA	0	NA	3	33.3333	1	0	0	NA	1	100	0	NA	0	NA	0	NA	0	NA	0	NA
A-1G;A17G	0.00180703	0.0011041	8.75786	5.08178	74.8691	7.7269	66.1112	9.24821	10		A-1G;A17G	12	8.33333	7	0	9	11.1111	11	9.09091	7	42.8571	18	27.7778	8	62.5	9	44.4444	13	76.9231	13	61.5385	4	100	9	55.5556	8	0
A-1G;A17T	0.000965573	0.00132426	9.58636	6.55801	39.1269	8.63041	29.5405	10.8393	12.0833		A-1G;A17T	16	12.5	11	9.09091	20	15	9	0	21	14.2857	17	41.1765	11	45.4545	8	50	4	50	4	0	12	41.6667	12	41.6667	7	0
A-1G;A18C	0.000114148	9.38586e-05	3.25167	6.81235	51.3633	6.1658	48.1116	9.18832	8.08333		A-1G;A18C	8	0	7	0	15	33.3333	6	33.3333	9	44.4444	13	46.1538	8	25	6	83.3333	3	33.3333	5	60	7	57.1429	10	40	8	12.5
A-1G;A18G	0.000834058	0.000789564	4.02068	5.20189	53.2262	10.3205	49.2055	11.5574	12.4167		A-1G;A18G	17	0	5	20	20	5	15	33.3333	19	15.7895	20	40	9	22.2222	7	42.8571	9	33.3333	9	88.8889	11	27.2727	8	50	3	0
A-1G;A18T	0.00146777	0.000729803	6.99339	3.31036	67.1903	6.45246	60.1969	7.25208	36.5		A-1G;A18T	62	4.83871	20	10	55	10.9091	32	31.25	39	12.8205	46	36.9565	37	48.6486	26	65.3846	28	46.4286	21	80.9524	37	54.0541	35	68.5714	21	9.52381
A-1G;G19A	0.00250744	0.00316458	5.43235	8.05618	56.9576	14.0811	51.5252	16.2228	8.16667		A-1G;G19A	5	20	6	16.6667	11	0	10	30	10	0	13	30.7692	7	28.5714	7	42.8571	7	85.7143	4	50	6	16.6667	12	58.3333	2	0
A-1G;G19C	10	1.76769e+07	34.4784	18.9638	100	1.15689e+08	65.5216	1.15689e+08	1.41667		A-1G;G19C	1	0	1	100	3	100	3	0	0	NA	3	0	3	0	1	0	2	50	0	NA	0	NA	0	NA	1	0
A-1G;G19T	0.00436465	0.0038547	5.89592	3.31315	51.6457	9.9757	45.7498	10.5115	16.9167		A-1G;G19T	28	3.57143	12	0	25	20	15	6.66667	20	5	20	10	11	36.3636	15	46.6667	9	33.3333	11	18.1818	22	59.0909	15	53.3333	12	0
A-1G;A20C	0.0025948	0.00544861	9.80303	3.97692	31.1369	9.97114	21.3339	10.735	2.91667		A-1G;A20C	6	0	1	0	5	20	6	0	3	0	0	NA	3	33.3333	2	0	5	20	1	0	0	NA	3	33.3333	3	0
A-1G;A20G	0.108668	0.252128	10.9874	3.0602	100	124.485	89.0126	124.523	10.75		A-1G;A20G	25	12	8	0	11	0	4	0	24	16.6667	14	21.4286	10	40	3	0	3	0	6	16.6667	10	30	11	63.6364	11	0
A-1G;A20T	0.0131712	0.00823955	5.12131	2.45259	80.36	14.6948	75.2387	14.8981	27.5		A-1G;A20T	39	5.12821	16	6.25	47	2.12766	35	14.2857	29	17.2414	47	8.51064	22	9.09091	25	32	14	50	11	36.3636	22	81.8182	23	56.5217	15	13.3333
A-1G;G21A	3e-07	2.31904e-05	18.7362	15.9349	8.76835	3.11269	-9.96788	16.2361	10.5833		A-1G;G21A	7	14.2857	11	0	11	9.09091	8	0	11	27.2727	22	9.09091	10	0	10	10	4	50	13	23.0769	15	0	5	20	7	0
A-1G;G21C	NA	NA	NA	NA	NA	NA	NA	NA	0.416667		A-1G;G21C	0	NA	0	NA	1	0	0	NA	0	NA	1	0	0	NA	0	NA	1	0	1	0	0	NA	1	0	0	NA
A-1G;G21T	0.316207	2.32511	6.73388	3.95235	100	563.306	93.2661	563.32	19.0833		A-1G;G21T	28	7.14286	9	11.1111	31	6.45161	21	14.2857	20	5	29	6.89655	8	37.5	10	0	12	8.33333	18	0	19	52.6316	24	41.6667	16	0
A-1G;A22C	7.25893e-05	0.000444584	23.3588	26.6503	39.599	9.29995	16.2402	28.2264	1.5		A-1G;A22C	1	0	0	NA	1	0	1	0	3	66.6667	3	33.3333	2	50	1	100	1	0	2	0	2	0	1	100	1	0
A-1G;A22G	0.00233512	0.00224289	2.62207	2.60121	41.1095	10.7475	38.4875	11.0578	18.5833		A-1G;A22G	30	0	12	16.6667	22	0	25	8	26	30.7692	36	16.6667	16	12.5	7	14.2857	9	11.1111	15	53.3333	10	60	15	40	7	0
A-1G;A22T	1.07444e-05	4.01212e-05	4.47202	3.5192	11.4952	2.05966	7.02322	4.07762	25.9167		A-1G;A22T	32	3.125	22	4.54545	45	17.7778	20	10	20	15	42	7.14286	34	11.7647	18	16.6667	17	5.88235	23	17.3913	26	3.84615	12	25	20	0
A-1G;G23A	0.0023296	0.00159577	7.01764	3.95711	55.3083	7.93551	48.2907	8.86741	12.25		A-1G;G23A	7	14.2857	13	0	13	30.7692	6	0	22	13.6364	20	25	16	31.25	9	33.3333	5	60	11	63.6364	15	40	10	60	6	0
A-1G;G23C	0.239775	1.5143	14.0769	4.58725	100	416.331	85.9231	416.356	2		A-1G;G23C	1	0	1	0	3	0	3	33.3333	0	NA	5	0	2	0	0	NA	0	NA	3	0	4	25	2	50	0	NA
A-1G;G23T	0.0117406	0.0112047	9.66538	2.14627	42.818	9.09629	33.1526	9.34607	16.5833		A-1G;G23T	16	6.25	15	6.66667	37	10.8108	21	19.0476	14	7.14286	22	4.54545	16	18.75	7	14.2857	10	30	9	44.4444	15	33.3333	17	35.2941	10	0
A-1G;A24C	0.0140213	0.0218691	15.7432	6.52692	62.1698	23.0951	46.4266	23.9996	1.66667		A-1G;A24C	1	0	2	0	4	0	0	NA	2	0	2	50	1	0	2	0	1	0	1	100	0	NA	4	50	0	NA
A-1G;A24G	0.00247709	0.00139997	1.26686	2.75978	80.9684	8.60498	79.7015	9.0367	14.5		A-1G;A24G	22	9.09091	14	7.14286	32	0	19	15.7895	13	23.0769	10	30	10	30	13	69.2308	10	70	7	42.8571	14	78.5714	10	90	9	0
A-1G;A24T	0.000351417	0.000166458	0.748677	2.69505	57.9674	5.30813	57.2187	5.95311	28.1667		A-1G;A24T	42	2.38095	26	0	36	16.6667	23	26.087	37	24.3243	38	63.1579	25	60	19	52.6316	19	47.3684	14	57.1429	30	53.3333	29	55.1724	25	8
A-1G;T25A	0.000836413	0.000621902	13.4564	4.83871	57.0716	6.03669	43.6152	7.73659	17.4167		A-1G;T25A	25	16	14	7.14286	20	15	13	23.0769	17	29.4118	27	51.8519	24	29.1667	9	66.6667	14	42.8571	14	64.2857	17	64.7059	15	53.3333	11	0
A-1G;T25C	0.000702862	0.000753649	12.2641	4.01292	36.2547	5.18294	23.9905	6.55488	13.75		A-1G;T25C	21	9.52381	7	14.2857	28	14.2857	16	12.5	16	25	20	25	13	30.7692	9	33.3333	8	37.5	4	50	12	16.6667	11	54.5455	16	0
A-1G;T25G	0.000579044	0.000123949	9.24733	1.70638	76.1312	3.25998	66.8839	3.67957	1.33333		A-1G;T25G	4	0	0	NA	2	0	1	0	0	NA	5	60	3	66.6667	0	NA	0	NA	0	NA	0	NA	1	100	1	0
A-1G;C26A	0.00113058	0.000461241	2.05244	1.99321	60.4451	5.73697	58.3926	6.07336	9.33333		A-1G;C26A	19	0	3	0	14	0	6	33.3333	12	16.6667	18	33.3333	6	33.3333	5	60	5	60	10	60	4	75	10	50	6	0
A-1G;C26G	3e-07	0.000642135	35.6856	19.2226	31.1433	13.447	-4.54233	23.4591	1		A-1G;C26G	6	33.3333	0	NA	1	0	0	NA	0	NA	2	0	1	0	0	NA	0	NA	1	0	0	NA	1	100	1	0
A-1G;C26T	0.0032321	0.00283949	4.32757	5.06288	66.422	13.2784	62.0944	14.2109	12.1667		A-1G;C26T	26	7.69231	11	0	14	7.14286	13	23.0769	15	0	19	36.8421	6	50	5	40	3	100	8	62.5	17	58.8235	9	44.4444	8	37.5
A-1G;C27A	4.85425e-05	9.62268e-05	7.28837	5.93247	21.643	3.48137	14.3547	6.87853	20.0833		A-1G;C27A	20	5	14	14.2857	22	9.09091	17	41.1765	36	16.6667	17	29.4118	13	15.3846	22	13.6364	20	20	13	38.4615	24	29.1667	23	13.0435	9	0
A-1G;C27G	0.00343658	0.0121676	12.9213	5.48063	34.27	13.5138	21.3487	14.5829	1.33333		A-1G;C27G	3	0	1	0	3	0	1	0	4	0	0	NA	0	NA	0	NA	2	50	1	0	1	0	0	NA	2	0
A-1G;C27T	0.000309556	0.000327585	4.86969	10.3648	67.389	12.7375	62.5193	16.4217	9.41667		A-1G;C27T	18	5.55556	8	25	16	6.25	7	14.2857	9	22.2222	13	92.3077	8	50	5	40	6	66.6667	3	66.6667	12	41.6667	8	62.5	3	0
A-1G;T28A	0.000302811	0.000357884	12.9683	8.50267	59.4911	8.4631	46.5228	11.9966	10.9167		A-1G;T28A	19	10.5263	10	10	14	35.7143	10	30	9	22.2222	16	43.75	8	87.5	9	77.7778	16	37.5	7	71.4286	3	66.6667	10	40	7	14.2857
A-1G;T28C	0.00253698	0.00190566	15.2611	4.58798	71.7619	8.80401	56.5008	9.92775	16.6667		A-1G;T28C	26	19.2308	10	0	25	20	20	25	21	47.619	10	20	18	44.4444	17	47.0588	15	53.3333	14	71.4286	14	71.4286	10	80	8	0
A-1G;T28G	0.000115618	0.00029924	17.8336	22.475	59.4729	13.1941	41.6394	26.0617	0.916667		A-1G;T28G	2	0	0	NA	2	50	1	0	0	NA	0	NA	1	100	1	100	2	100	1	0	1	0	0	NA	2	0
A-1G;A29C	1.8991e-05	4.83699e-05	18.7928	14.5537	68.0187	12.8808	49.2259	19.4352	1.16667		A-1G;A29C	7	14.2857	2	50	0	NA	0	NA	0	NA	0	NA	1	0	1	100	1	100	0	NA	0	NA	2	100	0	NA
A-1G;A29G	0.00067177	0.000443779	4.77804	4.50089	66.5533	8.01487	61.7752	9.19218	10.6667		A-1G;A29G	14	0	8	0	16	25	13	23.0769	11	18.1818	15	60	12	33.3333	7	57.1429	4	75	13	53.8462	9	88.8889	6	50	11	9.09091
A-1G;A29T	0.00153996	0.000876053	2.15493	3.47297	68.9705	8.62794	66.8156	9.30069	18.0833		A-1G;A29T	32	6.25	15	13.3333	24	0	16	12.5	21	14.2857	30	36.6667	14	64.2857	14	35.7143	12	66.6667	17	76.4706	11	45.4545	11	72.7273	8	0
A-1G;T30A	0.000713494	0.000329278	1.44829	2.35359	57.8546	5.85164	56.4063	6.30722	36.6667		A-1G;T30A	59	15.2542	40	0	51	9.80392	35	14.2857	48	27.0833	61	37.7049	29	51.7241	15	46.6667	25	48	11	45.4545	36	61.1111	30	60	36	11.1111
A-1G;T30C	0.000541303	0.000360696	4.68058	6.95595	74.8386	8.96384	70.158	11.3462	16.3333		A-1G;T30C	24	12.5	12	0	17	17.6471	27	14.8148	22	40.9091	25	48	13	92.3077	6	83.3333	13	46.1538	5	80	18	61.1111	14	71.4286	11	9.09091
A-1G;T30G	0.000662902	0.00076141	2.4245	8.44953	56.4592	13.4031	54.0347	15.8442	5		A-1G;T30G	10	0	2	0	6	0	7	0	7	28.5714	9	33.3333	3	100	3	33.3333	4	50	2	100	4	75	3	0	4	0
A-1G;T31A	0.00130516	0.000537147	0.618348	1.98151	71.903	6.9733	71.2847	7.24937	14.8333		A-1G;T31A	26	0	14	0	23	0	12	33.3333	15	13.3333	23	47.8261	15	40	10	60	6	66.6667	7	85.7143	21	66.6667	6	66.6667	4	0
A-1G;T31C	0.00151651	0.000899268	10.7108	4.51585	75.3518	7.15249	64.641	8.45878	12.1667		A-1G;T31C	17	5.88235	19	15.7895	19	10.5263	6	16.6667	20	30	17	35.2941	5	40	6	66.6667	10	80	6	66.6667	5	100	16	50	7	28.5714
A-1G;T31G	0.000337164	0.000613689	8.95121	14.2716	54.5982	13.5946	45.647	19.7102	7		A-1G;T31G	14	7.14286	7	14.2857	13	15.3846	4	0	7	14.2857	8	87.5	4	50	4	75	6	83.3333	6	66.6667	6	83.3333	5	0	4	0
A-1G;T32A	0.00159853	0.000738101	6.64672	3.00695	62.8954	6.20147	56.2486	6.89203	23.75		A-1G;T32A	41	7.31707	12	0	34	14.7059	17	5.88235	39	20.5128	33	27.2727	31	48.3871	7	71.4286	19	47.3684	11	63.6364	24	45.8333	17	76.4706	29	3.44828
A-1G;T32C	0.00114842	0.000311428	5.73804	2.1271	70.468	3.77493	64.73	4.33297	25.9167		A-1G;T32C	36	5.55556	16	6.25	34	5.88235	20	30	31	19.3548	47	42.5532	26	53.8462	23	56.5217	17	70.5882	16	68.75	27	70.3704	18	66.6667	19	5.26316
A-1G;T32G	0.000518459	0.000831293	3.84707	11.0931	47.6369	12.0886	43.7898	16.4071	4.58333		A-1G;T32G	7	14.2857	1	0	11	0	6	16.6667	6	50	5	60	3	0	1	100	0	NA	6	50	3	33.3333	6	50	2	0
A-1G;T33A	0.000986437	0.000316069	9.20794	2.54336	68.1173	4.1697	58.9094	4.88417	27.1667		A-1G;T33A	46	8.69565	21	9.52381	39	15.3846	26	15.3846	38	23.6842	46	43.4783	22	68.1818	6	66.6667	24	58.3333	20	60	20	75	18	61.1111	25	8
A-1G;T33C	0.000634621	0.000382088	2.78058	3.86992	65.4451	7.64612	62.6646	8.56968	19		A-1G;T33C	32	18.75	24	0	22	13.6364	16	12.5	29	44.8276	28	42.8571	16	37.5	10	60	12	75	9	77.7778	11	54.5455	19	63.1579	8	12.5
A-1G;T33G	8.40057e-05	9.49638e-05	7.86119	8.06289	55.9093	10.1902	48.0481	12.9942	1.5		A-1G;T33G	5	0	2	0	3	33.3333	3	33.3333	0	NA	1	100	0	NA	0	NA	1	0	1	100	2	50	0	NA	1	0
A-1G;A34C	3e-07	0.00504053	100	1.27321e+06	23.5548	10.7839	-76.4452	1.27321e+06	2.08333		A-1G;A34C	0	NA	1	0	3	0	2	0	4	0	2	0	2	100	1	0	2	50	3	66.6667	0	NA	5	0	1	100
A-1G;A34G	0.00379096	0.00576432	13.8886	7.36759	55.9643	16.115	42.0757	17.7193	9.75		A-1G;A34G	12	8.33333	7	0	18	16.6667	12	16.6667	7	57.1429	11	45.4545	12	8.33333	5	40	8	75	4	75	13	61.5385	8	25	5	20
A-1G;A34T	0.000909796	0.000463654	3.95955	2.85889	54.6442	5.61875	50.6847	6.30425	27.9167		A-1G;A34T	37	2.7027	25	12	34	2.94118	27	22.2222	37	35.1351	44	22.7273	17	52.9412	14	42.8571	18	50	12	66.6667	35	54.2857	35	51.4286	22	0
A-1G;A35C	0.000656876	0.000642555	3.2711	7.62823	54.2555	10.9669	50.9844	13.359	7.33333		A-1G;A35C	9	0	4	0	9	11.1111	9	0	13	46.1538	12	41.6667	5	40	10	70	4	75	3	0	5	60	5	60	7	14.2857
A-1G;A35G	0.000744847	0.00043556	2.0266	2.71681	60.9983	8.04312	58.9717	8.48958	18.6667		A-1G;A35G	32	0	18	5.55556	33	12.1212	12	8.33333	26	15.3846	16	37.5	21	71.4286	9	66.6667	9	55.5556	18	72.2222	16	31.25	14	57.1429	14	7.14286
A-1G;A35T	0.00207357	0.000666155	7.9672	1.93048	63.317	4.11483	55.3498	4.54517	30.25		A-1G;A35T	56	7.14286	23	4.34783	41	12.1951	19	15.7895	34	20.5882	51	21.5686	22	45.4545	14	64.2857	18	61.1111	23	56.5217	28	53.5714	34	64.7059	17	17.6471
A-1G;A36C	0.000304076	0.000457851	8.4093	9.54314	44.908	9.24707	36.4987	13.2883	4.25		A-1G;A36C	5	0	4	25	11	9.09091	3	0	0	NA	9	66.6667	7	28.5714	2	50	2	50	4	50	2	0	2	50	1	0
A-1G;A36G	0.000349621	0.000346906	8.17001	6.61016	53.7819	8.0286	45.6119	10.3996	11.0833		A-1G;A36G	25	16	9	0	18	11.1111	6	16.6667	16	50	18	50	4	25	5	60	7	57.1429	6	83.3333	8	25	11	45.4545	18	11.1111
A-1G;A36T	0.00233235	0.00232567	11.9186	6.30556	55.1218	9.83677	43.2033	11.6843	13.5833		A-1G;A36T	11	9.09091	11	27.2727	17	5.88235	16	31.25	12	8.33333	28	17.8571	16	62.5	4	25	5	60	6	66.6667	19	42.1053	18	55.5556	8	0
A-1G;G37A	0.00180488	0.00182964	5.93097	5.28095	59.9723	13.4543	54.0413	14.4536	10.25		A-1G;G37A	17	0	9	22.2222	13	15.3846	10	20	13	7.69231	15	53.3333	12	33.3333	8	12.5	2	100	5	60	12	75	7	42.8571	9	0
A-1G;G37C	0.000238857	0.00177591	24.785	33.315	45.7058	19.5499	20.9208	38.6275	0.916667		A-1G;G37C	1	0	0	NA	0	NA	0	NA	3	33.3333	3	33.3333	1	100	0	NA	2	0	0	NA	0	NA	1	100	0	NA
A-1G;G37T	0.000783673	0.000624849	3.07731	3.71202	51.7762	7.7681	48.6989	8.60944	17.6667		A-1G;G37T	21	0	11	0	25	12	8	12.5	13	15.3846	31	45.1613	29	24.1379	10	40	13	61.5385	11	81.8182	20	35	20	50	15	6.66667
A-1G;G38A	0.00357662	0.00415682	2.46644	5.23154	56.8178	15.8447	54.3513	16.6861	7.25		A-1G;G38A	13	7.69231	2	0	15	0	5	0	12	0	2	0	9	33.3333	6	16.6667	6	83.3333	8	75	5	20	4	25	5	0
A-1G;G38C	0.000807848	0.00300369	13.0729	17.6432	57.1042	22.4268	44.0313	28.535	1.08333		A-1G;G38C	4	0	1	0	1	0	0	NA	1	0	0	NA	1	0	0	NA	3	100	0	NA	2	0	0	NA	0	NA
A-1G;G38T	0.0017246	0.00229534	4.94376	5.35196	35.9805	10.2197	31.0367	11.5363	8		A-1G;G38T	12	0	5	0	10	20	3	0	11	0	12	50	7	14.2857	4	25	7	57.1429	10	20	7	42.8571	8	25	7	0
A-1G;A39C	0.0379126	0.0519018	19.0244	6.15844	100	40.4277	80.9756	40.8941	0.916667		A-1G;A39C	0	NA	0	NA	1	0	0	NA	2	0	2	0	3	33.3333	0	NA	1	0	0	NA	1	100	1	100	0	NA
A-1G;A39G	0.00246911	0.000840056	5.01994	2.36056	74.1265	5.28749	69.1066	5.79049	12.5		A-1G;A39G	21	4.7619	8	0	15	6.66667	9	0	21	19.0476	18	22.2222	10	50	11	63.6364	5	60	8	62.5	12	58.3333	12	83.3333	9	0
A-1G;A39T	0.00159958	0.000681508	4.27409	2.47342	70.63	6.73728	66.3559	7.17696	14.4167		A-1G;A39T	24	4.16667	15	0	23	4.34783	14	21.4286	18	33.3333	29	27.5862	6	33.3333	9	44.4444	7	85.7143	6	66.6667	11	63.6364	11	72.7273	9	0
A-1G;C40A	0.00721323	0.00514746	6.03914	3.8735	76.6198	13.4515	70.5806	13.9981	5.25		A-1G;C40A	9	11.1111	5	0	4	0	8	0	8	0	8	25	7	14.2857	1	0	4	75	0	NA	2	100	7	57.1429	8	12.5
A-1G;C40G	0.000826797	0.00142579	7.23565	6.15459	33.6314	10.5895	26.3958	12.2481	6.16667		A-1G;C40G	9	11.1111	8	0	7	0	1	0	5	40	20	15	11	36.3636	2	50	0	NA	3	0	1	100	7	28.5714	3	0
A-1G;C40T	0.00434255	0.00359034	7.77648	2.31392	36.1325	6.07023	28.356	6.4963	25.8333		A-1G;C40T	44	4.54545	16	6.25	35	8.57143	19	10.5263	35	20	34	8.82353	27	14.8148	13	30.7692	12	25	20	30	27	48.1481	28	25	21	9.52381
A-1G;G41A	0.00146679	0.00125872	9.25757	2.85051	34.6523	4.64278	25.3947	5.44801	26.1667		A-1G;G41A	38	13.1579	23	8.69565	42	7.14286	25	12	29	10.3448	30	20	26	34.6154	14	35.7143	16	31.25	22	27.2727	23	47.8261	26	23.0769	16	6.25
A-1G;G41C	3e-07	9.20505e-05	16.6528	13.9893	13.4252	3.30603	-3.22764	14.3746	4.08333		A-1G;G41C	2	0	4	0	4	0	2	50	4	25	14	7.14286	6	0	2	0	3	0	3	0	3	33.3333	2	0	3	0
A-1G;G41T	0.04243	0.0400891	5.56221	2.00456	82.2256	32.0166	76.6634	32.0792	15.0833		A-1G;G41T	18	0	12	8.33333	16	12.5	18	0	17	5.88235	26	11.5385	15	26.6667	10	10	9	22.2222	13	30.7692	12	33.3333	15	66.6667	9	0
A-1G;C42A	0.00345938	0.00721858	12.6693	9.08881	51.6075	18.7034	38.9383	20.7948	4.33333		A-1G;C42A	4	0	2	0	11	9.09091	4	0	10	40	3	0	4	25	3	0	2	100	2	100	2	0	5	40	3	0
A-1G;C42G	0.0118916	NA	6.28145	NA	100	NA	93.7186	NA	0.333333		A-1G;C42G	0	NA	0	NA	0	NA	0	NA	0	NA	1	0	2	0	0	NA	0	NA	1	100	0	NA	0	NA	0	NA
A-1G;C42T	0.00796189	0.00654113	3.88962	2.08118	49.8257	13.2619	45.9361	13.4242	14		A-1G;C42T	24	0	15	13.3333	18	0	16	18.75	15	13.3333	18	11.1111	14	7.14286	12	16.6667	11	36.3636	7	57.1429	10	30	8	50	8	0
A-1G;C43A	1.78285e-05	2.95773e-05	1.68233	1.96988	15.3129	2.13979	13.6305	2.90846	24.5833		A-1G;C43A	29	0	18	11.1111	37	8.10811	16	25	36	19.4444	37	18.9189	29	13.7931	20	15	18	5.55556	13	15.3846	24	8.33333	18	22.2222	10	10
A-1G;C43G	0.00118978	0.00217653	9.6121	5.40692	26.1819	6.74863	16.5698	8.64748	3.08333		A-1G;C43G	3	0	1	0	5	0	3	0	5	0	9	22.2222	1	0	0	NA	2	50	0	NA	7	14.2857	1	0	1	0
A-1G;C43T	0.0014776	0.00101035	3.11948	1.94495	30.007	4.45366	26.8875	4.85983	24		A-1G;C43T	49	4.08163	15	6.66667	24	0	15	6.66667	33	6.06061	30	23.3333	27	18.5185	9	33.3333	18	27.7778	15	33.3333	31	19.3548	22	36.3636	16	6.25
A-1G;G44A	0.00964263	0.00973157	6.47376	2.11188	39.042	9.40924	32.5683	9.64334	23.1667		A-1G;G44A	27	11.1111	21	0	30	6.66667	22	9.09091	28	17.8571	42	7.14286	22	18.1818	8	25	10	10	23	30.4348	20	30	25	40	17	5.88235
A-1G;G44C	0.055398	0.104457	17.9946	5.19405	100	76.3289	82.0054	76.5055	3.41667		A-1G;G44C	10	10	2	0	2	50	0	NA	5	40	11	9.09091	1	0	1	0	7	42.8571	1	0	0	NA	1	100	2	50
A-1G;G44T	0.000419693	0.00133066	8.54497	6.02301	18.2044	6.0861	9.65941	8.56255	16.4167		A-1G;G44T	30	13.3333	10	0	27	14.8148	14	0	29	31.0345	27	18.5185	15	26.6667	9	22.2222	11	18.1818	6	0	6	0	13	23.0769	18	11.1111
A-1G;A45C	0.0019524	0.000979514	5.9151	2.12798	59.2522	7.06365	53.3371	7.37723	3		A-1G;A45C	9	0	6	0	4	0	2	0	2	0	5	20	1	0	2	50	1	100	0	NA	2	50	2	50	4	0
A-1G;A45G	0.0330272	0.0598723	6.99691	3.01549	52.2541	33.5023	45.2572	33.6378	15.6667		A-1G;A45G	23	21.7391	6	16.6667	22	0	20	5	17	11.7647	23	8.69565	15	26.6667	7	42.8571	6	0	12	25	18	33.3333	19	42.1053	6	16.6667
A-1G;A45T	0.000923915	0.000524017	4.91694	2.71342	46.8456	5.92679	41.9286	6.51839	25.9167		A-1G;A45T	39	2.5641	17	5.88235	37	13.5135	19	5.26316	31	29.0323	59	27.1186	24	25	14	50	13	69.2308	16	37.5	24	41.6667	18	44.4444	15	26.6667
A-1G;A46C	1.48447e-05	7.75333e-05	4.49158	6.07592	13.5608	4.08196	9.0692	7.31978	6.16667		A-1G;A46C	10	0	5	0	8	12.5	6	16.6667	6	0	11	27.2727	9	0	3	33.3333	4	25	6	0	5	40	1	0	4	0
A-1G;A46G	3e-07	4.65215e-05	28.2508	10.7327	17.325	3.7752	-10.9257	11.3773	15.0833		A-1G;A46G	22	27.2727	2	0	21	4.7619	18	11.1111	18	16.6667	27	40.7407	20	20	6	16.6667	12	8.33333	13	15.3846	17	11.7647	5	20	11	0
A-1G;A46T	0.0141737	0.00911406	10.1598	2.94717	83.8507	13.5953	73.6909	13.911	26.3333		A-1G;A46T	44	11.3636	19	5.26316	42	9.52381	20	5	36	11.1111	37	29.7297	26	19.2308	17	17.6471	16	68.75	10	40	27	59.2593	22	81.8182	18	0
A-1G;G47A	0.000122331	0.000151818	3.93984	3.37147	17.5563	2.8601	13.6165	4.42119	11.75		A-1G;G47A	12	0	3	0	19	5.26316	13	23.0769	16	6.25	28	21.4286	9	22.2222	7	14.2857	5	20	9	11.1111	11	9.09091	9	11.1111	11	0
A-1G;G47C	0.000222548	0.00125842	11.3887	6.2929	16.341	3.56289	4.95228	7.23152	2.91667		A-1G;G47C	3	0	2	0	5	0	2	0	4	25	2	0	5	0	2	0	4	25	3	0	2	0	1	0	6	0
A-1G;G47T	3e-07	0.000180427	6.31377	7.55187	8.34781	3.08503	2.03404	8.15771	19.1667		A-1G;G47T	23	4.34783	23	21.7391	16	0	10	20	17	11.7647	43	9.30233	27	11.1111	14	0	12	33.3333	13	15.3846	14	35.7143	18	0	14	0
A-1G;G48A	8.92699e-05	0.000223062	3.80032	3.67265	12.1321	3.24541	8.33178	4.90113	23.75		A-1G;G48A	38	2.63158	13	0	41	19.5122	15	0	30	10	32	15.625	19	26.3158	15	6.66667	13	23.0769	18	5.55556	22	4.54545	29	17.2414	15	13.3333
A-1G;G48C	0.130653	1.44572	13.5809	2.93923	0	87.066	-13.5809	87.1156	5.16667		A-1G;G48C	4	25	5	0	5	20	6	0	4	0	9	11.1111	4	0	1	0	6	16.6667	3	0	6	16.6667	9	0	7	0
A-1G;G48T	3e-07	0.000146078	7.54213	10.1411	5.81314	3.54433	-1.729	10.7426	21		A-1G;G48T	32	6.25	20	0	33	12.1212	19	5.26316	27	0	25	16	19	31.5789	6	83.3333	20	20	16	6.25	20	0	15	0	8	0
A-1G;G49A	0.0254809	0.0517392	7.59498	3.14059	40.1046	27.6506	32.5096	27.8284	12.5833		A-1G;G49A	24	4.16667	8	0	19	5.26316	11	9.09091	14	7.14286	21	9.52381	10	30	8	0	5	0	10	60	14	21.4286	7	28.5714	10	0
A-1G;G49C	2.65755e-05	0.000103649	25.7029	11.2009	13.4819	4.19282	-12.221	11.9599	3.08333		A-1G;G49C	5	20	1	0	6	16.6667	5	0	0	NA	6	0	4	25	1	0	0	NA	3	33.3333	3	0	3	0	0	NA
A-1G;G49T	3e-07	1.39334e-05	10.0003	4.0948	38.328	3.33326	28.3277	5.27996	6.08333		A-1G;G49T	14	7.14286	2	50	9	22.2222	8	50	9	44.4444	5	40	3	33.3333	7	42.8571	6	33.3333	1	0	4	25	5	40	6	0
A-1G;A50C	0.275513	1.58251	8.31388	2.56449	100	423.29	91.6861	423.297	5		A-1G;A50C	10	0	3	0	8	0	1	0	5	0	7	14.2857	3	0	6	33.3333	4	0	4	0	6	16.6667	3	33.3333	2	0
A-1G;A50G	0.396777	3.79463	7.8826	2.34847	100	722.456	92.1174	722.46	27.5833		A-1G;A50G	50	12	19	10.5263	44	6.81818	16	6.25	23	17.3913	44	11.3636	34	11.7647	24	0	23	8.69565	14	21.4286	14	21.4286	26	26.9231	17	0
A-1G;A50T	0.00718852	0.0103843	6.54398	2.25818	25.2742	8.75211	18.7302	9.03874	33.3333		A-1G;A50T	43	2.32558	25	12	51	7.84314	30	3.33333	49	16.3265	48	14.5833	33	6.06061	19	5.26316	33	30.303	22	27.2727	27	18.5185	20	20	13	7.69231
A-1G;C51A	0.391845	5.47554	14.825	3.79106	100	985.118	85.175	985.125	4.66667		A-1G;C51A	4	0	4	25	8	25	0	NA	7	0	13	23.0769	3	0	3	0	5	20	1	0	3	0	5	40	2	0
A-1G;C51G	8.34112e-05	0.00212043	25.3242	19.2297	28.2784	8.32479	2.9542	20.9544	4.25		A-1G;C51G	7	28.5714	7	14.2857	6	16.6667	4	50	2	50	3	33.3333	3	33.3333	2	0	5	0	4	25	6	16.6667	2	100	4	0
A-1G;C51T	6.57989e-05	0.000169129	4.61651	4.09964	12.8041	2.92068	8.18758	5.03363	22.0833		A-1G;C51T	40	5	17	0	24	20.8333	19	10.5263	31	16.129	29	20.6897	20	10	14	0	15	13.3333	17	11.7647	18	11.1111	21	19.0476	11	9.09091
A-1G;A52C	4.12706e-06	1.34643e-05	49.9709	16.923	13.5766	3.47345	-36.3943	17.2758	2.83333		A-1G;A52C	2	50	2	0	2	0	0	NA	3	0	9	22.2222	1	0	4	25	0	NA	2	0	8	0	1	0	3	0
A-1G;A52G	0.00113561	0.00393321	7.34047	4.14173	14.7453	4.41812	7.40478	6.05589	29.4167		A-1G;A52G	32	9.375	26	11.5385	41	9.7561	21	0	37	13.5135	37	13.5135	28	14.2857	20	35	33	6.06061	24	20.8333	27	11.1111	27	14.8148	13	0
A-1G;A52T	3.6607	1205.66	11.7644	1.85051	100	28380.9	88.2356	28380.9	40.6667		A-1G;A52T	49	12.2449	24	12.5	53	11.3208	27	11.1111	55	23.6364	77	11.6883	33	3.0303	25	12	32	12.5	31	12.9032	42	9.52381	40	15	21	0
A-1G;A53C	3e-07	0.000105878	5.00169	4.34556	13.8575	3.25517	8.85581	5.42955	5.16667		A-1G;A53C	9	0	0	NA	6	33.3333	7	0	5	20	8	12.5	9	11.1111	3	0	4	0	2	0	6	16.6667	3	0	7	0
A-1G;A53G	3.25718e-05	7.84061e-05	1.5861	3.07973	13.2513	3.54938	11.6652	4.69924	18.4167		A-1G;A53G	29	0	10	0	27	11.1111	14	7.14286	20	25	36	30.5556	15	0	15	6.66667	9	22.2222	15	13.3333	19	21.0526	12	8.33333	7	28.5714
A-1G;A53T	0.00296653	0.00688449	8.33601	3.42243	19.8007	6.35737	11.4647	7.22006	24.8333		A-1G;A53T	39	7.69231	15	0	31	12.9032	19	15.7895	38	18.4211	35	5.71429	21	9.52381	9	22.2222	26	34.6154	16	12.5	29	10.3448	20	30	14	21.4286
A-1G;T54A	0.000134235	0.000196088	7.17761	6.06871	31.841	5.62552	24.6634	8.275	18.25		A-1G;T54A	37	10.8108	13	0	19	36.8421	18	16.6667	27	33.3333	22	31.8182	11	45.4545	11	45.4545	21	38.0952	9	11.1111	20	20	11	27.2727	13	0
A-1G;T54C	0.000864603	0.000605601	3.29204	3.75647	68.0938	9.5379	64.8017	10.251	14.0833		A-1G;T54C	25	0	17	11.7647	19	21.0526	13	7.69231	18	33.3333	20	30	7	42.8571	6	66.6667	12	91.6667	6	66.6667	18	38.8889	8	62.5	6	16.6667
A-1G;T54G	2.80668e-05	8.53253e-05	9.19587	18.5826	44.3317	10.6221	35.1358	21.4043	2.75		A-1G;T54G	4	0	2	0	2	50	5	60	4	25	2	50	2	50	1	0	0	NA	2	100	4	0	5	80	0	NA
A-1G;C55A	0.000583126	0.000547576	1.93576	1.97618	25.8648	5.84877	23.9291	6.1736	22.9167		A-1G;C55A	41	0	20	5	33	15.1515	18	5.55556	31	6.45161	41	26.8293	11	9.09091	12	41.6667	17	11.7647	21	28.5714	15	40	15	20	16	0
A-1G;C55G	3e-07	3.44836e-05	25.1086	20.7338	42.847	8.35706	17.7383	22.3547	1.5		A-1G;C55G	1	0	3	66.6667	4	50	0	NA	1	0	3	66.6667	4	50	0	NA	0	NA	1	0	0	NA	1	0	0	NA
A-1G;C55T	0.000966204	0.000858047	10.8452	5.79282	59.1055	8.31957	48.2603	10.1377	14.5		A-1G;C55T	16	18.75	11	0	25	24	9	22.2222	12	33.3333	28	32.1429	17	41.1765	9	77.7778	8	25	12	66.6667	17	52.9412	10	70	9	0
A-1G;T56A	0.00113548	0.000401902	5.19822	2.05253	58.6994	4.9253	53.5011	5.33586	26.5833		A-1G;T56A	46	4.34783	17	11.7647	53	9.43396	23	4.34783	37	27.027	46	34.7826	22	45.4545	18	50	12	58.3333	17	64.7059	12	50	16	50	19	0
A-1G;T56C	0.00106707	0.000706598	8.49945	5.88024	68.9121	9.15691	60.4126	10.8824	12.5833		A-1G;T56C	17	5.88235	9	11.1111	18	11.1111	13	23.0769	17	11.7647	26	57.6923	12	41.6667	6	83.3333	7	71.4286	7	71.4286	10	40	9	77.7778	10	10
A-1G;T56G	0.000736585	0.000422593	5.81679	4.45294	64.6943	6.61361	58.8775	7.97298	4.25		A-1G;T56G	5	0	5	0	5	0	0	NA	6	33.3333	13	38.4615	3	66.6667	1	100	3	33.3333	5	80	3	66.6667	2	50	5	0
A-1G;A57C	0.000371114	0.00113423	11.3166	9.06388	28.4089	9.77835	17.0923	13.333	1.16667		A-1G;A57C	1	0	2	0	5	0	0	NA	3	33.3333	1	0	0	NA	0	NA	0	NA	0	NA	1	0	1	0	0	NA
A-1G;A57G	0.000764199	0.000626912	6.53315	5.02765	57.244	8.53327	50.7108	9.90424	19.4167		A-1G;A57G	36	8.33333	11	0	32	9.375	15	26.6667	18	27.7778	37	27.027	15	73.3333	9	55.5556	20	50	8	87.5	19	42.1053	13	38.4615	7	0
A-1G;A57T	0.000926217	0.000550523	9.92351	4.51221	64.634	6.97031	54.7105	8.30333	23.6667		A-1G;A57T	31	6.45161	19	15.7895	41	17.0732	30	20	30	20	30	40	30	63.3333	11	54.5455	11	72.7273	12	83.3333	22	40.9091	17	58.8235	15	6.66667
A-1G;T58A	0.00360694	0.00526938	12.5557	3.52314	31.3259	6.71942	18.7702	7.58704	29.9167		A-1G;T58A	39	7.69231	27	18.5185	28	14.2857	34	20.5882	25	8	45	20	33	12.1212	21	28.5714	31	35.4839	17	47.0588	36	30.5556	23	17.3913	20	5
A-1G;T58C	0.000782951	0.000401045	5.49078	2.47856	54.0933	5.95966	48.6025	6.45452	16.3333		A-1G;T58C	43	4.65116	11	0	28	14.2857	16	12.5	25	24	18	38.8889	11	36.3636	5	20	9	66.6667	5	80	13	46.1538	12	50	6	0
A-1G;T58G	0.00495802	0.0249715	20.6719	11.0685	36.6452	16.9524	15.9733	20.2459	4.58333		A-1G;T58G	7	28.5714	3	0	3	33.3333	2	50	5	0	8	37.5	3	0	5	20	2	100	2	0	7	14.2857	8	50	2	0
A-1G;G59A	0.000638828	0.000671205	2.44466	2.56517	19.2612	4.10354	16.8165	4.83933	19.6667		A-1G;G59A	27	3.7037	18	0	27	3.7037	20	0	23	21.7391	42	16.6667	16	18.75	7	14.2857	10	10	13	30.7692	23	13.0435	10	10	11	9.09091
A-1G;G59C	0.004895	0.0135675	12.2557	6.95896	31.8228	13.1014	19.5671	14.8349	4.08333		A-1G;G59C	4	0	4	0	5	20	4	25	3	0	5	0	4	0	3	66.6667	4	50	3	0	5	40	5	20	2	0
A-1G;G59T	0.00115837	0.00158961	7.00791	6.66207	41.9262	10.8973	34.9183	12.7724	4.08333		A-1G;G59T	7	0	0	NA	10	20	6	0	4	0	4	25	6	33.3333	1	100	0	NA	4	50	5	40	2	0	4	0
A-1G;T60A	0.0886874	0.117396	11.8128	1.89256	88.1677	56.4661	76.3549	56.4978	31.3333		A-1G;T60A	44	6.81818	24	8.33333	57	10.5263	32	12.5	46	15.2174	44	18.1818	14	7.14286	19	31.5789	17	11.7647	18	38.8889	28	32.1429	33	54.5455	22	4.54545
A-1G;T60C	3e-07	8.97204e-05	6.25316	7.32068	9.96898	3.19645	3.71582	7.98809	18.9167		A-1G;T60C	23	4.34783	15	6.66667	31	12.9032	12	16.6667	26	7.69231	28	14.2857	17	0	6	16.6667	14	0	15	33.3333	18	11.1111	22	36.3636	7	14.2857
A-1G;T60G	0.000116782	0.000142529	4.83329	5.06566	32.2627	6.2243	27.4294	8.02514	4.25		A-1G;T60G	9	0	3	0	4	0	11	27.2727	1	0	7	28.5714	2	50	1	0	7	28.5714	0	NA	3	0	3	66.6667	3	66.6667
A-1G;T61A	0.00138704	0.00123089	6.13852	3.02783	37.8722	7.13088	31.7337	7.74708	24.25		A-1G;T61A	34	14.7059	20	0	42	9.52381	15	6.66667	33	18.1818	43	25.5814	26	19.2308	17	17.6471	18	38.8889	16	50	15	26.6667	12	50	16	6.25
A-1G;T61C	0.000644605	0.000340291	6.78549	3.24181	61.6362	6.4603	54.8508	7.22806	19.1667		A-1G;T61C	45	6.66667	19	5.26316	28	10.7143	21	28.5714	26	23.0769	23	47.8261	15	60	12	41.6667	11	81.8182	7	57.1429	8	37.5	15	60	11	0
A-1G;T61G	0.000833694	0.00117829	7.80992	6.26606	42.0005	9.84073	34.1906	11.6663	5.33333		A-1G;T61G	16	6.25	4	0	3	0	5	0	7	14.2857	7	42.8571	5	40	2	50	3	0	6	33.3333	2	100	4	25	2	0
A-1G;T62A	0.000862618	0.000413942	2.52039	2.86084	73.5351	6.66416	71.0147	7.25227	15.25		A-1G;T62A	25	0	7	0	14	14.2857	20	15	12	41.6667	23	30.4348	20	55	7	85.7143	14	85.7143	9	66.6667	18	50	14	78.5714	11	0
A-1G;T62C	0.000988432	0.000865239	0.327445	6.05551	63.1621	11.4593	62.8347	12.9609	13.25		A-1G;T62C	26	11.5385	11	18.1818	22	0	12	0	12	33.3333	16	62.5	13	61.5385	11	45.4545	7	42.8571	8	37.5	15	60	6	83.3333	11	9.09091
A-1G;T62G	2.21173e-06	5.17386e-05	9.99022	21.257	40.0566	14.991	30.0664	26.0114	1.25		A-1G;T62G	4	0	1	0	1	100	0	NA	1	100	3	0	2	0	2	100	0	NA	0	NA	1	0	0	NA	0	NA
A-1G;A63C	0.00044108	0.000213132	7.70442	3.3694	73.1131	4.70332	65.4087	5.78568	1.5		A-1G;A63C	5	0	2	0	3	0	0	NA	2	50	0	NA	0	NA	1	100	1	100	1	100	0	NA	3	66.6667	0	NA
A-1G;A63G	0.00162742	0.00251013	6.73972	9.427	52.8105	15.0665	46.0708	17.7727	12.1667		A-1G;A63G	16	12.5	8	0	27	11.1111	9	0	14	21.4286	18	11.1111	10	50	9	88.8889	3	66.6667	12	25	9	11.1111	11	81.8182	11	18.1818
A-1G;A63T	0.000753457	0.000461783	2.10807	2.44146	55.9811	7.24021	53.873	7.64077	17.1667		A-1G;A63T	31	0	9	11.1111	33	6.06061	6	16.6667	22	40.9091	27	25.9259	12	33.3333	13	30.7692	11	63.6364	16	75	18	44.4444	8	62.5	5	0
A-1G;T64A	0.000663351	0.000368712	5.70227	3.70514	52.9939	5.51947	47.2917	6.64776	22.5833		A-1G;T64A	31	6.45161	19	10.5263	32	6.25	33	12.1212	33	33.3333	25	40	17	47.0588	16	50	15	53.3333	14	64.2857	20	30	16	62.5	13	7.69231
A-1G;T64C	0.000607932	0.000436663	12.2788	4.93069	65.3852	6.69584	53.1063	8.3154	18.8333		A-1G;T64C	42	11.9048	19	10.5263	25	16	14	35.7143	15	53.3333	34	35.2941	8	50	6	66.6667	15	86.6667	13	61.5385	16	56.25	19	52.6316	10	10
A-1G;T64G	0.00121732	0.00182409	8.92157	7.64126	55.7184	18.2262	46.7968	19.7632	1.5		A-1G;T64G	6	0	2	0	1	0	0	NA	2	0	2	0	1	100	1	100	1	0	0	NA	2	50	0	NA	0	NA
A-1G;C65A	0.00131999	0.00116463	7.89774	4.39576	46.9695	7.19047	39.0717	8.42767	9.08333		A-1G;C65A	9	0	7	0	12	16.6667	4	25	6	16.6667	18	27.7778	11	18.1818	4	50	6	50	10	60	14	28.5714	8	62.5	3	33.3333
A-1G;C65G	0.0074527	0.00811283	12.6055	7.41385	92.0217	25.5113	79.4162	26.5668	2.16667		A-1G;C65G	4	0	2	0	4	0	4	0	4	50	0	NA	2	50	2	0	2	100	0	NA	0	NA	2	100	1	0
A-1G;C65T	0.00629643	0.00628084	4.26839	3.96882	61.5965	16.0527	57.3281	16.536	9		A-1G;C65T	16	0	7	0	9	0	5	20	8	0	11	9.09091	16	43.75	7	28.5714	4	0	7	71.4286	8	75	10	50	4	25
A-1G;C66A	0.00254473	0.00219876	3.85072	2.19335	33.0859	6.18963	29.2352	6.56676	22.25		A-1G;C66A	42	7.14286	17	5.88235	39	2.5641	18	0	32	6.25	17	17.6471	20	25	17	17.6471	17	41.1765	11	18.1818	19	42.1053	18	22.2222	8	0
A-1G;C66G	0.000151399	0.000274237	65.2817	20.9039	23.6742	7.60694	-41.6075	22.2449	2.91667		A-1G;C66G	3	66.6667	0	NA	2	50	3	66.6667	1	0	9	11.1111	3	33.3333	2	0	1	100	1	0	7	14.2857	3	33.3333	0	NA
A-1G;C66T	0.00303013	0.00249652	4.89287	2.45647	34.3096	6.60459	29.4167	7.04662	15.4167		A-1G;C66T	29	6.89655	13	15.3846	14	0	11	0	12	0	29	20.6897	18	16.6667	13	23.0769	10	30	13	38.4615	15	26.6667	8	25	12	8.33333
A-1G;C67A	0.00174582	0.00085249	4.96743	2.33618	55.2957	6.54093	50.3283	6.94561	10.0833		A-1G;C67A	14	0	6	0	17	5.88235	13	15.3846	11	18.1818	14	14.2857	12	41.6667	12	50	4	50	6	33.3333	8	50	4	75	5	0
A-1G;C67G	5.08575e-05	0.000122054	9.92668	16.0271	48.3924	11.0354	38.4657	19.4589	2		A-1G;C67G	4	0	1	0	4	25	2	50	1	100	5	20	1	0	0	NA	3	100	1	0	1	0	1	0	3	0
A-1G;C67T	0.00300107	0.00132387	5.59945	2.22799	54.2287	5.46083	48.6292	5.89784	10.8333		A-1G;C67T	15	6.66667	7	0	12	8.33333	9	0	17	5.88235	18	22.2222	10	30	7	42.8571	12	50	6	50	10	40	7	57.1429	5	0
A-1G;A68C	3e-07	0.0157757	100	1.72894e+06	66.8016	10.6526	-33.1984	1.72894e+06	3.33333		A-1G;A68C	0	NA	5	60	3	33.3333	0	NA	6	50	10	80	2	50	2	50	5	20	3	100	4	100	0	NA	5	0
A-1G;A68G	0.000815084	0.000286556	3.17212	2.63322	77.5543	4.75671	74.3822	5.43692	16.25		A-1G;A68G	32	6.25	14	0	21	4.7619	14	14.2857	16	43.75	20	50	20	55	6	83.3333	13	76.9231	14	85.7143	15	73.3333	10	60	14	7.14286
A-1G;A68T	0.000143729	7.97972e-05	1.29367	1.95485	53.7181	5.05102	52.4245	5.41611	22.9167		A-1G;A68T	41	0	23	8.69565	30	26.6667	16	37.5	28	35.7143	34	38.2353	19	47.3684	17	41.1765	16	37.5	7	57.1429	25	60	19	78.9474	14	14.2857
A-1G;A69C	0.000685764	0.00200402	21.3006	18.1589	54.0258	20.0216	32.7252	27.0298	4.16667		A-1G;A69C	9	33.3333	2	0	6	50	6	0	8	50	3	100	5	20	3	33.3333	4	25	0	NA	3	66.6667	1	100	4	0
A-1G;A69G	0.000299555	0.000169049	2.15291	2.47464	55.4809	5.70503	53.328	6.21862	17		A-1G;A69G	29	0	11	9.09091	29	20.6897	10	10	17	35.2941	23	39.1304	18	61.1111	7	71.4286	20	50	10	50	15	73.3333	15	33.3333	12	8.33333
A-1G;A69T	3e-07	0.000111281	5.56543	9.6001	9.98779	4.14305	4.42236	10.4559	21.4167		A-1G;A69T	26	3.84615	19	10.5263	21	14.2857	19	21.0526	24	29.1667	28	21.4286	22	18.1818	15	13.3333	12	16.6667	16	43.75	29	0	26	38.4615	10	10
A-1G;T70A	0.000890287	0.0006512	2.38699	5.26532	55.9735	8.43742	53.5865	9.94554	12.9167		A-1G;T70A	15	20	11	0	12	0	9	0	16	25	32	40.625	11	54.5455	8	62.5	11	27.2727	7	71.4286	13	46.1538	10	60	13	7.69231
A-1G;T70C	0.0762252	0.167903	8.95129	3.41082	100	108.451	91.0487	108.505	8.91667		A-1G;T70C	15	0	10	0	14	14.2857	4	0	10	20	18	38.8889	17	17.6471	3	0	3	0	4	25	3	33.3333	6	66.6667	3	33.3333
A-1G;T70G	0.00115108	0.00239118	30.9107	18.47	71.4133	11.7304	40.5026	21.8802	1.25		A-1G;T70G	1	0	0	NA	2	50	0	NA	1	0	2	50	1	100	2	50	2	100	1	100	2	100	1	0	1	0
A-1G;A71C	0.000295075	0.000981709	27.4629	13.3525	49.4957	9.9707	22.0327	16.6645	2.91667		A-1G;A71C	6	16.6667	1	100	6	16.6667	1	0	1	100	2	50	5	20	1	100	2	50	3	66.6667	2	50	5	40	5	0
A-1G;A71G	0.000248616	0.000390632	8.3535	9.71053	51.5643	10.7432	43.2108	14.4814	10.3333		A-1G;A71G	19	5.26316	5	0	17	35.2941	10	20	9	33.3333	21	57.1429	5	0	6	33.3333	4	100	6	50	15	53.3333	7	57.1429	16	6.25
A-1G;A71T	0.000492867	0.000545677	5.68813	6.24837	46.583	8.15383	40.8949	10.2726	10.3333		A-1G;A71T	18	5.55556	7	0	14	7.14286	9	11.1111	13	23.0769	10	50	7	71.4286	8	12.5	8	50	9	33.3333	8	75	13	38.4615	12	8.33333
A-1G;A72C	0.000521986	0.00131422	12.2863	11.9454	37.0443	11.6163	24.758	16.6623	4.16667		A-1G;A72C	9	11.1111	2	0	4	25	6	0	3	33.3333	11	45.4545	1	0	5	60	0	NA	4	50	4	0	1	100	1	0
A-1G;A72G	0.0003766	0.000226205	6.47353	2.64695	37.6032	3.73941	31.1297	4.58144	14.6667		A-1G;A72G	25	4	10	10	29	10.3448	13	23.0769	18	16.6667	14	28.5714	12	50	4	25	6	50	11	27.2727	17	35.2941	17	35.2941	7	0
A-1G;A72T	0.00105875	0.000661291	4.99833	2.91597	46.5657	6.32239	41.5673	6.96243	23.5		A-1G;A72T	38	2.63158	19	10.5263	38	10.5263	19	5.26316	35	20	31	19.3548	18	55.5556	10	50	19	36.8421	10	50	27	55.5556	18	27.7778	17	5.88235
A-1G;A73C	0.000642623	0.000555144	7.12333	5.25719	46.9361	6.02314	39.8128	7.99476	3.58333		A-1G;A73C	4	0	1	0	6	0	0	NA	5	20	8	37.5	2	50	6	33.3333	2	50	2	50	4	25	3	66.6667	0	NA
A-1G;A73G	0.000910096	0.000831668	2.3625	6.85738	74.3173	15.2257	71.9548	16.6987	12.0833		A-1G;A73G	17	0	14	28.5714	13	0	17	17.6471	20	20	27	40.7407	8	37.5	8	100	2	50	6	33.3333	8	25	5	80	5	0
A-1G;A73T	0.0020344	0.00371249	5.63395	4.41502	24.3799	8.07783	18.7459	9.20563	20.5833		A-1G;A73T	28	3.57143	11	27.2727	29	13.7931	18	0	30	6.66667	35	17.1429	20	10	12	50	9	33.3333	12	8.33333	30	16.6667	13	46.1538	17	5.88235
A-1G;A74C	0.00069713	0.000790733	3.00602	6.97606	61.5124	12.6635	58.5064	14.4578	4.66667		A-1G;A74C	10	0	1	0	9	0	5	20	3	33.3333	6	16.6667	5	60	4	100	7	42.8571	1	0	2	50	3	33.3333	7	0
A-1G;A74G	0.000319639	0.000588372	7.43475	11.0047	44.1488	11.3836	36.7141	15.8332	12.75		A-1G;A74G	25	8	6	0	19	10.5263	13	23.0769	18	22.2222	24	50	8	37.5	10	40	8	87.5	6	66.6667	7	0	9	77.7778	11	9.09091
A-1G;A74T	0.00641765	0.00467688	10.1789	3.02173	64.5087	9.30694	54.3297	9.78519	26.1667		A-1G;A74T	44	6.81818	12	8.33333	37	5.40541	26	26.9231	29	24.1379	38	23.6842	16	25	17	29.4118	12	25	22	63.6364	38	52.6316	23	69.5652	15	13.3333
A-1G;C75A	9.43423e-05	0.000127469	5.49884	5.13898	37.8937	6.8157	32.3949	8.53598	3.08333		A-1G;C75A	9	0	1	0	5	20	2	0	3	33.3333	4	25	0	NA	1	0	4	50	5	40	1	100	2	0	1	0
A-1G;C75G	3e-07	5.68862e-05	16.6716	18.041	27.0514	6.36792	10.3798	19.1318	2.33333		A-1G;C75G	2	0	4	25	1	0	2	0	5	20	1	0	4	0	1	0	1	0	1	0	2	50	4	75	3	33.3333
A-1G;C75T	0.000664096	0.000657184	10.6969	5.92444	43.815	6.19441	33.1181	8.57145	9.83333		A-1G;C75T	8	12.5	6	0	10	10	8	37.5	14	14.2857	18	33.3333	12	50	7	42.8571	12	33.3333	6	50	8	25	9	55.5556	3	0
A-1G;A76C	1.29008e-05	0.000122863	18.9565	7.11145	13.4047	3.03084	-5.55181	7.73038	3.33333		A-1G;A76C	7	14.2857	1	0	3	0	4	0	5	0	4	0	3	0	2	0	2	0	0	NA	6	33.3333	3	0	0	NA
A-1G;A76G	0.00724216	0.00819317	9.89257	3.82251	58.0221	15.4389	48.1295	15.9051	16.1667		A-1G;A76G	27	3.7037	15	13.3333	31	22.5806	11	0	21	14.2857	21	38.0952	10	30	13	15.3846	13	46.1538	5	20	14	57.1429	13	61.5385	11	45.4545
A-1G;A76T	0.00119233	0.00102685	1.45905	4.02265	46.3718	8.4885	44.9128	9.39342	25.5833		A-1G;A76T	37	13.5135	21	14.2857	34	0	17	5.88235	37	24.3243	44	20.4545	16	43.75	13	53.8462	27	48.1481	15	40	24	25	22	59.0909	19	0
A-1G;T77A	0.000528473	0.000544906	3.14112	3.85515	28.7431	5.12136	25.602	6.41018	16.3333		A-1G;T77A	27	7.40741	5	0	21	0	21	23.8095	22	22.7273	25	20	14	21.4286	7	14.2857	13	23.0769	13	38.4615	15	26.6667	13	23.0769	8	12.5
A-1G;T77C	0.000424568	0.000631559	5.89276	5.90708	26.9905	6.01702	21.0977	8.43197	15.4167		A-1G;T77C	19	5.26316	5	0	19	5.26316	15	6.66667	35	22.8571	16	12.5	19	36.8421	5	40	12	41.6667	7	0	15	40	18	27.7778	10	20
A-1G;T77G	0.0236781	0.191936	43.3263	16.0065	0	123.461	-43.3263	124.494	0.916667		A-1G;T77G	1	100	0	NA	2	0	1	100	2	0	1	100	0	NA	0	NA	1	0	0	NA	3	0	0	NA	1	0
A-1G;A78C	0.00683167	0.0282927	12.3437	7.18455	27.8744	18.7571	15.5308	20.086	3.75		A-1G;A78C	6	0	3	0	4	0	0	NA	5	60	10	10	3	0	4	0	1	0	5	60	2	0	2	0	2	50
A-1G;A78G	0.000534632	0.000701672	3.3853	7.38269	42.738	8.80747	39.3527	11.4924	13.5		A-1G;A78G	21	19.0476	9	0	17	0	11	45.4545	13	23.0769	26	38.4615	8	50	3	0	10	50	10	30	18	33.3333	16	56.25	7	0
A-1G;A78T	0.000243667	0.000237912	3.06431	4.39566	31.8525	4.81043	28.7882	6.51629	25.75		A-1G;A78T	34	5.88235	18	0	44	9.09091	21	19.0476	29	27.5862	36	30.5556	20	35	11	18.1818	24	12.5	13	53.8462	25	36	34	38.2353	18	5.55556
A-1G;G79A	0.00553452	0.00633814	3.44408	2.16722	28.6689	8.96101	25.2248	9.21936	13.8333		A-1G;G79A	23	0	7	0	23	13.0435	10	20	17	0	23	4.34783	15	13.3333	3	0	15	33.3333	11	18.1818	15	20	4	25	6	33.3333
A-1G;G79C	0.000532382	0.00138563	10.3269	6.75683	26.0924	6.27368	15.7655	9.22029	3		A-1G;G79C	4	0	3	0	3	0	3	0	1	0	6	16.6667	1	0	2	50	4	0	2	0	5	40	2	50	0	NA
A-1G;G79T	0.000237396	0.000190979	6.27192	3.38847	32.2506	3.33725	25.9787	4.75594	17.3333		A-1G;G79T	24	8.33333	11	0	30	13.3333	11	18.1818	11	27.2727	42	26.1905	13	30.7692	16	43.75	13	38.4615	14	28.5714	11	18.1818	12	25	21	9.52381
A-1G;A80C	3.74686e-05	0.000202733	9.76293	17.7155	24.2642	8.14312	14.5012	19.4974	3.75		A-1G;A80C	4	0	3	0	7	28.5714	2	0	2	0	5	40	8	0	2	50	6	66.6667	1	0	2	50	3	66.6667	1	0
A-1G;A80G	0.000943154	0.000708385	2.48121	3.62128	49.0239	7.43927	46.5427	8.27384	12.25		A-1G;A80G	18	11.1111	15	6.66667	21	0	10	20	16	25	13	30.7692	18	33.3333	4	50	8	62.5	5	40	6	33.3333	13	46.1538	9	0
A-1G;A80T	0.000672642	0.000308416	8.48454	3.22772	60.2088	4.61999	51.7243	5.63582	30.1667		A-1G;A80T	43	11.6279	28	7.14286	44	9.09091	29	31.0345	38	31.5789	43	46.5116	34	44.1176	15	40	26	57.6923	14	71.4286	25	68	23	52.1739	20	25
A-1G;G81A	0.000405749	0.000953673	10.8206	5.182	21.3885	4.09263	10.5679	6.60324	8.5		A-1G;G81A	10	10	7	14.2857	7	0	11	9.09091	15	20	12	25	4	0	7	28.5714	10	20	6	16.6667	10	10	3	33.3333	9	11.1111
A-1G;G81C	0.0629535	NA	22.8482	NA	100	NA	77.1518	NA	0.583333		A-1G;G81C	1	0	0	NA	0	NA	0	NA	0	NA	0	NA	0	NA	0	NA	0	NA	5	40	0	NA	1	100	0	NA
A-1G;G81T	0.000817093	0.00352842	10.9778	3.18094	14.8252	3.32689	3.8474	4.60289	14.6667		A-1G;G81T	23	8.69565	11	9.09091	14	7.14286	14	21.4286	19	5.26316	28	14.2857	14	14.2857	8	25	13	7.69231	8	12.5	14	7.14286	10	20	6	16.6667
A-1G;A82C	0.000475413	0.00145807	18.8335	6.84136	10.69	3.62788	-8.14352	7.74376	2.83333		A-1G;A82C	2	0	2	0	0	NA	4	25	4	0	4	0	3	0	8	12.5	0	NA	0	NA	1	0	6	0	1	0
A-1G;A82G	0.00079749	0.00342117	3.1936	3.46476	7.97949	3.47628	4.7859	4.90807	18		A-1G;A82G	26	7.69231	5	20	29	0	15	6.66667	17	0	26	7.69231	23	17.3913	8	12.5	23	4.34783	16	0	15	6.66667	13	23.0769	16	12.5
A-1G;A82T	0.000121126	0.000157726	4.14965	2.80797	14.9889	2.28923	10.8393	3.62288	24.5		A-1G;A82T	32	3.125	19	5.26316	28	3.57143	25	16	32	15.625	37	18.9189	25	16	9	0	21	9.52381	19	21.0526	24	12.5	23	13.0435	18	0
A-1G;A83C	3e-07	4.66158e-05	3.33526	3.53465	9.84226	2.7678	6.507	4.48937	6.41667		A-1G;A83C	14	0	4	0	10	20	8	0	6	16.6667	6	0	8	0	3	0	1	0	3	33.3333	6	16.6667	8	0	2	50
A-1G;A83G	0.000364232	0.00267385	7.03134	6.76648	11.0743	4.70764	4.04292	8.243	19.9167		A-1G;A83G	23	4.34783	7	0	29	20.6897	16	0	28	10.7143	30	16.6667	26	11.5385	9	33.3333	17	0	16	6.25	24	37.5	14	14.2857	15	0
A-1G;A83T	0.000564539	0.001342	6.3896	3.31949	14.4176	3.22678	8.02802	4.62938	24.1667		A-1G;A83T	39	10.2564	18	5.55556	31	3.22581	14	0	35	17.1429	31	16.129	27	14.8148	13	15.3846	21	4.7619	15	13.3333	21	19.0476	25	12	15	13.3333
A-1G;A84C	7.50748e-05	0.000345233	19.2241	17.2289	31.3724	6.02562	12.1483	18.2522	2.83333		A-1G;A84C	1	0	2	0	5	20	1	0	8	37.5	6	33.3333	0	NA	2	50	2	50	2	0	2	50	3	0	1	0
A-1G;A84G	0.000257714	0.000471321	1.44831	3.11892	11.69	3.42996	10.2417	4.63598	16.6667		A-1G;A84G	20	0	18	0	20	0	11	0	22	9.09091	21	28.5714	18	11.1111	10	20	15	13.3333	15	0	11	18.1818	19	15.7895	15	6.66667
A-1G;A84T	0.000524595	0.000341559	4.46518	3.84626	55.6787	6.00537	51.2136	7.13149	15.9167		A-1G;A84T	26	3.84615	12	0	20	20	12	8.33333	15	46.6667	22	36.3636	10	40	9	55.5556	17	41.1765	13	61.5385	16	75	19	42.1053	12	16.6667
A-1G;T85A	5.24365e-05	0.000620276	10.276	4.81383	12.1762	2.43846	1.90024	5.3962	21.6667		A-1G;T85A	38	10.5263	10	0	27	18.5185	12	16.6667	31	9.67742	32	9.375	22	18.1818	18	5.55556	22	13.6364	11	0	22	18.1818	15	20	17	5.88235
A-1G;T85C	0.0515923	0.0883651	7.4102	2.24022	47.0223	31.5642	39.6121	31.6436	17.0833		A-1G;T85C	25	12	12	0	25	4	14	21.4286	18	11.1111	26	11.5385	14	0	12	8.33333	10	10	15	20	13	38.4615	21	28.5714	11	9.09091
A-1G;T85G	0.000239153	0.00109189	8.9488	8.81547	18.6615	7.44652	9.71273	11.5396	5.58333		A-1G;T85G	14	14.2857	6	0	9	0	7	14.2857	12	33.3333	4	25	4	0	1	0	2	0	1	100	6	0	1	0	1	0
A-1G;T86A	0.000467295	0.00268509	5.5872	4.91943	10.6017	5.10952	5.01453	7.09281	23.0833		A-1G;T86A	46	6.52174	18	0	31	9.67742	22	9.09091	17	0	41	21.9512	14	35.7143	5	20	20	0	13	23.0769	26	30.7692	24	12.5	13	0
A-1G;T86C	0.000456985	0.000946672	1.89573	4.97256	16.5673	4.45699	14.6716	6.67765	20.8333		A-1G;T86C	26	11.5385	17	5.88235	33	0	13	15.3846	24	12.5	29	20.6897	19	21.0526	11	9.09091	19	15.7895	14	7.14286	25	8	20	30	6	0
A-1G;T86G	3e-07	4.90112e-05	8.3541	12.3147	27.8157	8.81439	19.4616	15.1441	1.66667		A-1G;T86G	5	0	2	50	0	NA	2	0	1	100	2	0	2	0	1	100	2	0	0	NA	1	0	2	0	1	0
A-1G;C87A	0.0682921	0.151191	3.4912	2.59389	55.767	66.1805	52.2758	66.2313	14.5833		A-1G;C87A	15	0	16	6.25	22	0	19	5.26316	13	0	23	4.34783	12	0	5	40	11	0	12	8.33333	16	62.5	11	18.1818	9	0
A-1G;C87G	0.14555	0.429193	8.86208	4.46385	100	183.608	91.1379	183.663	2.25		A-1G;C87G	3	0	0	NA	4	0	3	0	2	0	3	0	1	0	1	0	7	0	1	0	1	0	1	100	0	NA
A-1G;C87T	0.00131531	0.00192047	10.5259	6.09971	48.2314	11.4258	37.7055	12.952	9.25		A-1G;C87T	19	5.26316	14	7.14286	12	25	6	33.3333	10	20	8	12.5	8	25	6	33.3333	10	80	1	100	11	36.3636	6	16.6667	12	0
A-1G;T88A	0.00134883	0.00285506	6.93388	2.3254	14.1393	3.48554	7.20541	4.19005	32		A-1G;T88A	56	5.35714	13	15.3846	40	10	35	2.85714	36	19.4444	53	7.54717	36	11.1111	19	15.7895	33	12.1212	8	25	27	11.1111	28	10.7143	19	5.26316
A-1G;T88C	0.00194756	0.00084945	2.7631	0.920409	23.9507	2.38413	21.1876	2.55563	22.25		A-1G;T88C	28	0	13	0	27	3.7037	17	5.88235	20	10	30	6.66667	30	13.3333	12	25	23	17.3913	15	20	22	22.7273	30	23.3333	21	9.52381
A-1G;T88G	3e-07	0.000113641	18.7428	5.83401	13.8038	2.56061	-4.93907	6.37121	2.83333		A-1G;T88G	7	14.2857	0	NA	4	0	0	NA	2	0	4	0	4	25	4	0	2	0	1	0	2	0	4	0	2	0
A-1G;C89A	3e-07	6.03724e-05	2.96083	4.00034	8.28242	2.52784	5.32159	4.73209	10.4167		A-1G;C89A	16	0	12	16.6667	14	14.2857	8	25	12	8.33333	12	0	16	6.25	3	0	7	0	7	0	13	0	5	40	3	0
A-1G;C89G	0.124633	2.12308	29.6664	9.49121	0	301.281	-29.6664	301.43	2.25		A-1G;C89G	2	0	2	0	4	0	2	100	2	0	4	75	2	0	1	0	1	0	2	50	2	0	3	0	1	0
A-1G;C89T	5.88092e-05	0.000320236	6.36144	7.32987	12.0563	3.65377	5.69485	8.19005	13.9167		A-1G;C89T	18	5.55556	11	0	18	16.6667	7	0	22	27.2727	14	7.14286	15	6.66667	8	0	20	35	10	0	14	7.14286	10	20	12	0
A-1G;A90C	3e-07	9.5701e-05	5.57361	5.56184	9.99253	2.90923	4.41891	6.27676	4.75		A-1G;A90C	8	0	2	0	9	22.2222	2	0	9	0	8	0	2	50	5	0	3	0	2	0	3	0	4	0	4	0
A-1G;A90G	0.000284003	0.000570898	9.3156	2.66313	16.1238	2.24044	6.8082	3.48021	26.3333		A-1G;A90G	42	9.52381	15	6.66667	40	7.5	27	18.5185	25	8	48	16.6667	30	20	13	15.3846	17	11.7647	23	8.69565	15	20	21	14.2857	15	6.66667
A-1G;A90T	0.00051972	0.00101382	5.93911	2.63904	13.9934	2.91011	8.0543	3.92852	26.25		A-1G;A90T	45	6.66667	13	0	34	5.88235	29	6.89655	22	9.09091	47	8.51064	22	22.7273	17	17.6471	23	26.087	19	10.5263	21	4.7619	23	13.0435	19	0
A-1G;G91A	0.000111315	0.000437004	13.218	6.92723	6.17217	2.89081	-7.0458	7.50622	16.9167		A-1G;G91A	22	9.09091	9	11.1111	17	29.4118	10	0	27	3.7037	28	7.14286	22	0	10	10	14	7.14286	19	10.5263	12	25	13	7.69231	16	31.25
A-1G;G91C	0.000177635	0.000216535	57.0438	16.2372	11.1516	5.57508	-45.8922	17.1676	4.75		A-1G;G91C	3	33.3333	5	60	6	66.6667	2	0	10	20	6	0	7	14.2857	3	0	4	25	3	0	6	0	2	50	3	66.6667
A-1G;G91T	0.0108429	0.0305218	5.2531	4.20705	23.3345	14.7303	18.0814	15.3193	25.6667		A-1G;G91T	33	18.1818	10	10	37	10.8108	24	20.8333	33	0	43	11.6279	32	9.375	12	0	20	25	16	50	25	36	23	8.69565	15	13.3333
A-1G;G92A	0.00763653	0.00886322	5.46328	2.38036	32.9824	10.2886	27.5192	10.5604	23.1667		A-1G;G92A	44	2.27273	13	23.0769	37	5.40541	18	16.6667	24	4.16667	51	11.7647	21	4.7619	10	10	11	36.3636	16	31.25	16	43.75	17	17.6471	17	0
A-1G;G92C	0.000203014	0.00562061	11.3818	11.8307	13.012	4.80427	1.63016	12.7689	5.91667		A-1G;G92C	7	14.2857	2	0	9	0	7	28.5714	5	20	7	14.2857	4	0	4	0	3	66.6667	6	0	13	7.69231	4	0	8	12.5
A-1G;G92T	0.000951535	0.00163378	8.20077	6.11916	28.7082	5.7756	20.5074	8.41437	10.6667		A-1G;G92T	12	16.6667	0	NA	17	5.88235	8	0	15	13.3333	14	28.5714	5	40	8	12.5	20	35	9	11.1111	8	25	12	33.3333	3	0
A-1G;C93A	0.0113288	0.0140798	6.88726	3.64208	51.4149	18.5466	44.5277	18.9009	7.16667		A-1G;C93A	14	7.14286	3	0	11	9.09091	6	16.6667	13	0	10	10	8	12.5	4	0	3	66.6667	6	50	4	50	4	25	6	0
A-1G;C93G	0.0205109	0.0652534	13.7931	2.55966	25.0353	12.6461	11.2422	12.9025	2.83333		A-1G;C93G	2	0	4	0	9	11.1111	1	0	4	0	1	0	1	0	3	0	2	0	2	0	3	33.3333	2	0	3	33.3333
A-1G;C93T	0.000267964	0.000226398	1.83567	3.03894	42.5376	6.51197	40.702	7.18616	11.5833		A-1G;C93T	23	0	9	0	13	7.69231	5	20	15	20	17	35.2941	15	66.6667	3	33.3333	8	62.5	7	42.8571	12	25	12	25	12	16.6667
A-1G;A94C	0.0424837	0.124373	19.9937	6.42872	100	79.0469	80.0063	79.3078	2.83333		A-1G;A94C	10	20	4	0	4	50	3	0	2	0	2	0	3	33.3333	2	50	0	NA	0	NA	1	0	3	100	5	0
A-1G;A94G	0.000913253	0.000536159	5.61474	3.51926	57.44	6.94439	51.8253	7.78522	21.0833		A-1G;A94G	42	11.9048	16	0	21	9.52381	23	8.69565	29	34.4828	33	30.303	16	62.5	19	36.8421	15	66.6667	8	62.5	14	50	17	52.9412	18	27.7778
A-1G;A94T	0.000343652	0.000151648	5.19284	2.36295	46.4306	3.94208	41.2377	4.59603	27.3333		A-1G;A94T	38	2.63158	31	19.3548	51	11.7647	22	18.1818	42	26.1905	32	40.625	18	55.5556	16	50	20	40	8	50	24	45.8333	26	38.4615	29	10.3448
A-1G;A95C	0.000311921	0.000409887	3.9233	9.76023	68.9728	16.3925	65.0495	19.0782	4.08333		A-1G;A95C	11	0	4	0	4	0	2	100	4	0	9	66.6667	5	100	1	0	1	100	1	0	4	50	3	66.6667	3	0
A-1G;A95G	0.000822936	0.000514185	1.43203	3.98464	55.0097	7.85755	53.5777	8.81013	15.5		A-1G;A95G	17	0	13	7.69231	25	4	12	0	23	26.087	26	46.1538	8	75	7	28.5714	10	30	9	44.4444	15	60	21	57.1429	13	23.0769
A-1G;A95T	0.00101062	0.000417414	7.23549	2.68172	62.7666	5.15251	55.5312	5.80861	27.6667		A-1G;A95T	38	7.89474	36	11.1111	45	6.66667	29	17.2414	32	31.25	46	34.7826	22	50	17	70.5882	18	44.4444	12	58.3333	25	56	12	75	20	5
A-1G;A96C	0.000380658	0.000999857	13.8475	16.9191	47.6427	13.5758	33.7951	21.6924	4.75		A-1G;A96C	7	14.2857	4	50	13	7.69231	2	0	9	44.4444	5	60	1	0	3	66.6667	3	100	0	NA	3	0	7	28.5714	2	0
A-1G;A96G	0.00110189	0.000530387	6.87502	2.92054	59.9679	5.63304	53.0929	6.34513	10.6667		A-1G;A96G	12	0	16	12.5	17	11.7647	10	10	12	25	21	33.3333	4	25	2	50	2	100	8	62.5	14	50	10	60	6	0
A-1G;A96T	0.00323463	0.00303114	5.22035	4.31034	54.1807	11.0832	48.9604	11.8918	17.0833		A-1G;A96T	21	14.2857	17	35.2941	21	0	15	20	22	4.54545	27	18.5185	15	40	11	45.4545	9	44.4444	10	40	16	37.5	21	61.9048	14	0
A-1G;A97C	0.000505703	0.00074002	7.44023	9.758	51.9986	11.6163	44.5584	15.171	4.83333		A-1G;A97C	6	0	7	14.2857	6	0	5	40	6	16.6667	9	33.3333	4	75	3	33.3333	2	100	4	75	3	0	3	66.6667	7	14.2857
A-1G;A97G	0.000240011	8.38795e-05	0.908631	1.44649	50.4343	3.66202	49.5256	3.93735	29.25		A-1G;A97G	41	0	13	0	42	11.9048	35	28.5714	41	41.4634	42	40.4762	29	31.0345	13	53.8462	21	47.619	24	62.5	27	55.5556	23	43.4783	29	3.44828
A-1G;A97T	0.000234761	0.000125907	3.43394	4.17661	61.2766	5.80425	57.8427	7.15076	19		A-1G;A97T	31	3.22581	22	9.09091	30	10	17	35.2941	18	66.6667	21	52.381	8	50	10	70	17	70.5882	12	58.3333	19	36.8421	23	65.2174	15	6.66667
A-1G;G98A	0.00130214	0.000943029	5.62625	5.79712	67.2712	10.3176	61.6449	11.8347	8.16667		A-1G;G98A	10	0	4	0	14	7.14286	9	33.3333	17	11.7647	14	35.7143	5	80	1	100	1	0	4	25	17	70.5882	2	100	6	0
A-1G;G98C	0.195263	0.469431	17.223	2.17559	100	138.491	82.777	138.508	1.58333		A-1G;G98C	2	0	1	0	3	0	1	0	2	0	1	0	0	NA	2	0	1	0	1	0	1	0	4	50	0	NA
A-1G;G98T	0.000324062	0.000365565	5.46445	5.89835	41.9097	8.40201	36.4452	10.2657	5.16667		A-1G;G98T	9	0	5	20	6	0	6	16.6667	10	30	5	40	3	66.6667	3	0	5	40	0	NA	7	42.8571	3	66.6667	2	0
A-1G;A99C	0.000139009	0.000224919	5.64452	11.7189	48.5855	11.5959	42.9409	16.4863	2.16667		A-1G;A99C	4	0	5	0	2	0	1	100	2	0	3	66.6667	1	100	2	50	1	0	0	NA	0	NA	5	40	0	NA
A-1G;A99G	0.00241605	0.00244628	5.64713	4.69974	55.7401	13.3725	50.0929	14.1743	9.08333		A-1G;A99G	15	0	8	0	10	10	11	18.1818	14	28.5714	12	8.33333	11	54.5455	3	0	3	33.3333	6	83.3333	12	58.3333	4	25	10	10
A-1G;A99T	0.00271808	0.0018521	3.67853	2.54484	48.2031	7.52155	44.5246	7.9404	17.0833		A-1G;A99T	18	0	15	0	29	10.3448	14	7.14286	24	4.16667	22	36.3636	8	12.5	11	27.2727	15	46.6667	15	46.6667	20	35	14	57.1429	10	0
A-1G;A100C	0.604697	7.75204	9.64537	1.65014	100	1035.65	90.3546	1035.65	3.83333		A-1G;A100C	6	16.6667	0	NA	4	0	5	0	4	0	6	0	4	0	3	0	5	0	0	NA	8	12.5	1	0	1	0
A-1G;A100G	0.00804188	0.00670893	6.04345	3.18266	67.8302	15.3049	61.7868	15.6323	13.0833		A-1G;A100G	19	0	12	0	26	15.3846	8	12.5	20	25	16	25	7	0	7	57.1429	12	41.6667	6	50	12	58.3333	12	66.6667	7	0
A-1G;A100T	0.0176876	0.0143123	5.39791	1.7484	49.6295	13.0483	44.2315	13.1649	22.6667		A-1G;A100T	22	4.54545	21	4.7619	31	3.22581	16	6.25	36	13.8889	47	4.25532	21	4.7619	14	28.5714	14	28.5714	15	33.3333	23	34.7826	12	41.6667	16	0
A-1G;T101A	0.000955077	0.000708232	4.7779	4.44568	49.5105	7.75962	44.7326	8.94292	19		A-1G;T101A	25	12	14	0	29	10.3448	22	4.54545	23	17.3913	41	46.3415	11	18.1818	5	40	4	75	16	50	24	50	14	35.7143	18	11.1111
A-1G;T101C	0.00149544	0.000988081	6.87192	3.76214	54.7684	8.09689	47.8965	8.92823	17.9167		A-1G;T101C	16	0	9	33.3333	33	18.1818	23	8.69565	26	19.2308	34	23.5294	14	42.8571	10	40	17	58.8235	9	66.6667	12	58.3333	12	33.3333	12	16.6667
A-1G;T101G	0.000121913	0.000309407	22.6789	24.0287	60.3818	11.4824	37.703	26.6312	1.58333		A-1G;T101G	1	0	1	0	2	50	1	0	3	33.3333	3	100	0	NA	1	0	2	50	0	NA	3	66.6667	2	50	0	NA
A-1G;T102A	0.00692399	0.00384126	5.63053	2.09408	59.8294	8.62587	54.1988	8.87642	15.5		A-1G;T102A	16	6.25	16	0	18	5.55556	13	7.69231	26	7.69231	24	20.8333	11	9.09091	9	22.2222	13	38.4615	14	64.2857	15	53.3333	11	45.4545	13	30.7692
A-1G;T102C	0.00129336	0.00127631	12.645	5.20207	51.1411	7.23719	38.4961	8.91282	12.5		A-1G;T102C	17	11.7647	10	10	22	13.6364	11	9.09091	15	33.3333	18	27.7778	7	28.5714	5	40	8	50	10	80	15	40	12	33.3333	8	12.5
A-1G;T102G	0.0292557	0.191084	74.2355	29.4255	15.1805	125.071	-59.055	128.486	0.75		A-1G;T102G	0	NA	0	NA	0	NA	0	NA	1	0	3	100	0	NA	0	NA	1	100	0	NA	2	0	2	50	1	0
A-1G;A103C	0.00649977	0.0443867	18.0091	18.1885	82.8882	64.6969	64.8791	67.205	0.75		A-1G;A103C	1	100	0	NA	5	0	0	NA	1	0	0	NA	0	NA	0	NA	0	NA	1	100	0	NA	1	100	0	NA
A-1G;A103G	0.000947374	0.000578747	7.34051	4.29398	64.893	6.90965	57.5525	8.1352	7.16667		A-1G;A103G	10	0	3	0	12	16.6667	6	16.6667	10	30	12	33.3333	5	60	1	0	9	44.4444	9	77.7778	7	57.1429	2	100	11	0
A-1G;A103T	0.00192566	0.00267334	5.90301	9.97345	63.4164	18.402	57.5134	20.9309	10.8333		A-1G;A103T	9	0	9	11.1111	13	30.7692	11	0	11	18.1818	15	40	12	8.33333	6	100	12	50	12	50	15	53.3333	5	40	8	12.5
A-1G;T104A	0.00197693	0.00191965	2.85149	2.77287	34.7101	8.16365	31.8586	8.62172	21.75		A-1G;T104A	35	11.4286	17	0	29	0	20	30	22	4.54545	33	18.1818	27	18.5185	11	27.2727	16	25	21	47.619	16	31.25	14	21.4286	12	8.33333
A-1G;T104C	0.00109937	0.000906014	6.23303	4.44481	48.4986	7.33124	42.2656	8.57341	9		A-1G;T104C	11	9.09091	11	0	8	12.5	10	10	10	10	14	28.5714	7	57.1429	4	50	6	33.3333	6	16.6667	15	53.3333	6	66.6667	9	0
A-1G;T104G	0.000827389	0.00586804	18.6367	24.7806	35.9558	13.7078	17.319	28.3193	0.916667		A-1G;T104G	1	0	0	NA	0	NA	2	0	1	0	0	NA	0	NA	0	NA	1	100	0	NA	5	20	1	0	1	0
A-1G;A105C	0.00227351	0.0122064	21.1934	12.0265	47.7177	30.5714	26.5243	32.8519	1.16667		A-1G;A105C	3	0	1	100	3	0	1	0	1	0	1	0	0	NA	0	NA	3	66.6667	1	0	0	NA	0	NA	0	NA
A-1G;A105G	9.68965e-05	9.08424e-05	4.42447	5.39961	47.4099	6.34836	42.9855	8.33411	9.16667		A-1G;A105G	12	0	6	16.6667	14	28.5714	10	20	14	42.8571	16	37.5	2	100	7	42.8571	6	33.3333	4	25	9	33.3333	10	70	5	0
A-1G;A105T	0.00192578	0.00160013	6.13605	3.69732	47.1953	8.44669	41.0592	9.22045	13.25		A-1G;A105T	27	3.7037	6	0	15	6.66667	10	10	16	25	15	6.66667	10	50	13	46.1538	13	53.8462	14	50	9	22.2222	11	45.4545	9	11.1111
A-1G;C106A	0.000708636	0.00125261	13.573	7.34622	36.1168	8.10258	22.5438	10.937	8.58333		A-1G;C106A	11	9.09091	6	16.6667	10	10	4	25	15	13.3333	19	47.3684	4	0	4	50	10	40	5	40	13	38.4615	2	0	3	33.3333
A-1G;C106G	0.00131745	0.00191556	13.3989	8.05908	50.5389	10.603	37.1399	13.3181	4.58333		A-1G;C106G	5	40	4	0	4	0	9	11.1111	8	25	6	16.6667	1	100	1	100	6	33.3333	3	33.3333	5	40	3	66.6667	2	0
A-1G;C106T	0.000646132	0.000318002	2.59233	2.97322	59.7393	5.5251	57.1469	6.2743	16		A-1G;C106T	19	5.26316	19	0	29	10.3448	18	16.6667	18	27.7778	19	42.1053	13	46.1538	6	66.6667	12	41.6667	13	46.1538	15	53.3333	11	81.8182	12	8.33333
A-1G;T107A	0.0109177	0.0178632	6.92311	3.01829	34.0987	14.1515	27.1756	14.4698	30.5833		A-1G;T107A	42	7.14286	26	0	56	14.2857	29	13.7931	43	20.9302	37	18.9189	16	0	16	18.75	24	29.1667	21	38.0952	30	26.6667	27	25.9259	21	9.52381
A-1G;T107C	0.00120317	0.0015247	2.0485	4.3404	29.2522	7.87653	27.2037	8.99326	14.0833		A-1G;T107C	21	4.7619	8	0	16	0	18	0	22	9.09091	19	26.3158	14	21.4286	13	23.0769	7	57.1429	7	28.5714	13	7.69231	11	54.5455	12	0
A-1G;T107G	0.00170576	0.00102298	6.13532	3.31659	58.2523	7.29547	52.117	8.01397	4.91667		A-1G;T107G	8	0	5	0	6	16.6667	7	0	8	25	6	16.6667	3	33.3333	1	100	4	50	2	50	4	50	5	60	5	0
A-1G;T108A	0.000327125	0.000214681	2.63196	3.26063	47.6771	5.84132	45.0451	6.68975	25.25		A-1G;T108A	39	2.5641	18	0	34	17.6471	25	36	29	17.2414	48	39.5833	13	53.8462	8	75	21	38.0952	19	36.8421	23	43.4783	26	53.8462	23	26.087
A-1G;T108C	0.00206813	0.00129899	9.90154	4.71589	72.9401	8.61124	63.0385	9.818	21.8333		A-1G;T108C	35	5.71429	15	26.6667	35	11.4286	15	33.3333	28	21.4286	37	21.6216	17	58.8235	9	66.6667	12	75	11	90.9091	23	56.5217	25	60	24	8.33333
A-1G;T108G	0.00389858	0.00581817	11.0496	6.78623	46.9851	11.2518	35.9355	13.1399	4.33333		A-1G;T108G	2	0	1	0	6	16.6667	7	14.2857	7	0	8	12.5	1	0	5	60	1	0	3	66.6667	7	42.8571	4	25	6	16.6667
A-1G;T109A	0.00183543	0.00112827	10.6282	4.06167	63.8999	7.57332	53.2717	8.59374	34.5833		A-1G;T109A	40	10	34	8.82353	57	10.5263	20	30	45	31.1111	67	23.8806	23	56.5217	27	48.1481	28	67.8571	29	48.2759	28	46.4286	17	82.3529	27	0
A-1G;T109C	0.00124601	0.000740868	8.96708	4.79323	67.2136	7.41275	58.2465	8.82746	19.8333		A-1G;T109C	25	12	22	13.6364	20	5	16	12.5	37	29.7297	28	28.5714	21	52.381	8	87.5	16	68.75	8	75	25	48	12	66.6667	10	10
A-1G;T109G	0.000559018	0.000711898	6.97366	8.47711	72.782	10.883	65.8083	13.795	3.58333		A-1G;T109G	10	0	3	33.3333	4	25	2	0	3	33.3333	2	50	1	100	0	NA	3	33.3333	6	33.3333	6	100	3	33.3333	4	50
A-1G;G110A	0.00183079	0.00101302	2.28729	3.42716	69.6642	9.22433	67.3769	9.84041	9.66667		A-1G;G110A	12	0	8	0	15	0	4	50	14	7.14286	22	36.3636	6	33.3333	3	66.6667	12	75	7	42.8571	8	75	5	60	11	9.09091
A-1G;G110C	3.53759e-06	4.80912e-05	3.12211	4.99394	15.2608	5.52686	12.1387	7.44886	5.25		A-1G;G110C	15	0	4	0	3	66.6667	4	0	7	0	11	18.1818	2	50	0	NA	4	0	0	NA	3	33.3333	10	10	5	0
A-1G;G110T	0.0101307	0.0116541	6.78602	4.48608	53.8064	15.749	47.0204	16.3755	6.33333		A-1G;G110T	5	0	5	0	6	16.6667	9	11.1111	3	0	12	0	9	33.3333	8	37.5	1	0	5	40	8	50	5	40	3	0
A-1G;A111C	0.000237264	0.00204319	21.2877	10.1629	15.2578	6.75643	-6.02993	12.2038	1.58333		A-1G;A111C	1	0	3	0	2	50	0	NA	3	0	3	0	1	0	3	0	2	0	0	NA	0	NA	1	0	2	0
A-1G;A111G	0.00992466	0.00688592	8.25408	1.86409	44.7612	7.6924	36.5071	7.91504	16.4167		A-1G;A111G	18	5.55556	12	8.33333	21	4.7619	21	9.52381	20	15	25	8	14	7.14286	9	22.2222	14	35.7143	14	42.8571	19	31.5789	10	40	14	14.2857
A-1G;A111T	0.00288954	0.00216327	5.06084	1.91312	32.9061	5.44908	27.8452	5.77516	28.1667		A-1G;A111T	49	2.04082	20	5	35	17.1429	37	8.10811	31	6.45161	42	11.9048	19	15.7895	12	33.3333	18	16.6667	13	38.4615	35	37.1429	27	25.9259	19	5.26316
A-1G;T112A	0.000782943	0.00156614	3.80475	4.28005	18.1073	5.13521	14.3026	6.685	12.9167		A-1G;T112A	17	5.88235	13	7.69231	16	0	16	0	12	33.3333	18	22.2222	6	0	7	28.5714	9	11.1111	9	11.1111	15	13.3333	17	17.6471	8	0
A-1G;T112C	0.000705682	0.00102177	3.60812	3.81426	19.9272	3.94093	16.3191	5.48448	14.25		A-1G;T112C	12	8.33333	4	0	19	0	12	8.33333	20	15	20	10	11	18.1818	12	16.6667	14	7.14286	12	33.3333	21	23.8095	14	14.2857	5	0
A-1G;T112G	0.000147169	0.00376798	19.1595	5.59272	18.1161	3.02836	-1.04345	6.35999	1.33333		A-1G;T112G	2	0	1	0	0	NA	1	0	3	0	1	0	0	NA	3	0	1	0	1	0	2	0	1	0	0	NA
A-1G;A113C	0.00579776	0.0454075	5.86792	50.4145	100	389.38	94.1321	392.63	0.666667		A-1G;A113C	0	NA	1	0	0	NA	0	NA	0	NA	4	0	1	100	2	50	0	NA	0	NA	0	NA	0	NA	0	NA
A-1G;A113G	0.000328768	0.000300174	10.0664	5.79569	44.911	5.22775	34.8446	7.80509	10.25		A-1G;A113G	11	9.09091	9	11.1111	13	7.69231	8	37.5	16	31.25	16	37.5	12	41.6667	5	40	5	40	5	60	19	31.5789	4	75	13	0
A-1G;A113T	0.00449921	0.00384343	13.8631	3.27725	45.8711	6.70366	32.008	7.46187	13		A-1G;A113T	11	18.1818	4	0	18	11.1111	9	11.1111	23	17.3913	20	15	10	40	17	23.5294	7	57.1429	14	35.7143	11	45.4545	12	41.6667	11	18.1818
A-1G;G114A	0.00812135	0.00788646	7.73302	5.43828	80.7888	18.7985	73.0557	19.5693	8.66667		A-1G;G114A	18	11.1111	3	33.3333	7	0	5	20	22	4.54545	17	23.5294	4	0	3	66.6667	8	75	4	25	7	85.7143	6	66.6667	7	0
A-1G;G114C	3e-07	0.00105508	12.5021	20.5396	32.5888	14.7777	20.0868	25.3033	1		A-1G;G114C	3	0	0	NA	0	NA	0	NA	2	50	0	NA	0	NA	1	100	1	0	0	NA	2	50	3	0	0	NA
A-1G;G114T	0.00027715	0.000731803	4.2835	11.8387	23.523	7.4883	19.2395	14.0082	16.0833		A-1G;G114T	17	11.7647	4	0	16	0	17	17.6471	34	26.4706	30	16.6667	14	35.7143	9	55.5556	11	18.1818	10	70	13	15.3846	18	5.55556	12	0
A-1G;A115C	0.000423017	0.00106554	21.2253	24.4709	81.09	28.9927	59.8647	37.9395	1.16667		A-1G;A115C	2	0	1	100	3	0	0	NA	2	50	3	100	1	0	0	NA	0	NA	0	NA	2	100	0	NA	0	NA
A-1G;A115G	0.0019779	0.00179676	11.1537	5.84879	68.2035	10.3195	57.0497	11.8617	10.5		A-1G;A115G	14	14.2857	10	10	19	5.26316	15	40	14	14.2857	13	38.4615	5	20	5	60	3	100	4	75	11	45.4545	13	69.2308	3	0
A-1G;A115T	0.00118746	0.00113158	7.64498	4.97671	49.2367	8.7403	41.5917	10.0579	12.9167		A-1G;A115T	19	15.7895	12	0	23	21.7391	9	0	18	27.7778	20	25	9	33.3333	4	75	7	57.1429	5	60	18	50	11	27.2727	12	16.6667
A-1G;C116A	0.00421433	0.0046101	7.28533	2.93457	33.4153	7.7614	26.13	8.29765	15.4167		A-1G;C116A	22	4.54545	14	14.2857	21	4.7619	17	17.6471	21	4.7619	26	7.69231	16	18.75	5	20	8	50	10	40	14	28.5714	11	18.1818	13	7.69231
A-1G;C116G	0.000334239	0.00129027	18.8379	14.0325	37.591	10.764	18.7531	17.6854	2.16667		A-1G;C116G	3	33.3333	3	0	2	0	1	0	4	25	5	60	2	0	0	NA	1	0	2	50	1	100	2	0	2	0
A-1G;C116T	0.000631933	0.000716265	3.96911	4.34057	31.8721	6.70896	27.903	7.99066	15.75		A-1G;C116T	22	4.54545	5	0	32	3.125	14	14.2857	21	19.0476	32	21.875	14	21.4286	9	55.5556	5	0	12	50	9	22.2222	14	35.7143	8	25
A-1G;T117A	0.00109481	0.00523698	2.72942	1.71322	5.04233	2.08045	2.3129	2.69507	31		A-1G;T117A	49	8.16327	23	4.34783	42	0	21	0	40	7.5	47	2.12766	24	4.16667	30	6.66667	19	5.26316	23	0	24	8.33333	30	3.33333	23	4.34783
A-1G;T117C	0.00544496	0.0368182	17.4613	5.98065	10.4664	9.37234	-6.99496	11.118	12.4167		A-1G;T117C	22	13.6364	4	25	19	10.5263	9	11.1111	16	31.25	16	12.5	12	25	5	0	14	7.14286	8	25	12	0	12	50	11	9.09091
A-1G;T117G	0.00429782	0.0132284	7.85745	5.26619	23.6113	11.9047	15.7538	13.0175	4.16667		A-1G;T117G	2	0	6	0	1	0	9	0	7	14.2857	5	0	5	20	3	0	4	0	1	100	4	25	3	0	3	0
A-1G;C118A	1.78485e-05	5.26498e-05	10.9423	4.84246	5.0647	1.29192	-5.87764	5.01183	20.0833		A-1G;C118A	22	9.09091	17	5.88235	30	3.33333	20	5	18	5.55556	30	3.33333	13	0	13	0	21	9.52381	15	20	21	0	21	4.7619	12	0
A-1G;C118G	0.000182394	0.00290587	18.5569	12.2299	13.2857	11.9035	-5.27119	17.0665	0.666667		A-1G;C118G	2	0	0	NA	1	0	0	NA	0	NA	4	0	0	NA	0	NA	0	NA	0	NA	0	NA	1	0	0	NA
A-1G;C118T	0.00659127	0.0115968	4.53702	1.60836	14.7365	4.86227	10.1995	5.12138	11.9167		A-1G;C118T	13	0	12	0	22	4.54545	12	8.33333	11	0	13	0	12	8.33333	5	0	14	7.14286	6	33.3333	11	9.09091	12	8.33333	14	7.14286
A-1G;T119A	0.00908385	0.0612041	3.18629	1.22357	1.55706	2.61303	-1.62923	2.88531	39.1667		A-1G;T119A	37	8.10811	34	0	58	5.17241	34	0	56	7.14286	67	1.49254	30	13.3333	19	0	32	0	32	0	37	2.7027	34	0	30	6.66667
A-1G;T119C	0.435171	3.82305	3.25617	1.55294	100	723.244	96.7438	723.245	25.0833		A-1G;T119C	29	3.44828	19	10.5263	43	13.9535	16	6.25	25	0	43	0	25	16	19	5.26316	10	0	19	10.5263	29	10.3448	24	20.8333	12	25
A-1G;T119G	0.0117978	0.0395506	17.119	4.80394	30.6325	11.698	13.5136	12.646	3.58333		A-1G;T119G	5	20	1	0	2	0	1	0	9	11.1111	2	0	4	0	4	25	3	33.3333	2	0	4	50	6	16.6667	1	0
A-1G;G120A	0.00201521	0.00773211	2.35589	1.41622	5.03826	2.13824	2.68237	2.56472	18.0833		A-1G;G120A	19	0	13	0	26	0	20	0	25	4	23	0	13	7.69231	10	0	16	0	10	0	25	16	17	0	10	0
A-1G;G120C	0.00259863	0.00185019	17.7718	6.55234	88.0552	9.65986	70.2834	11.6724	3.16667		A-1G;G120C	3	0	3	0	2	50	7	14.2857	2	50	8	50	5	40	0	NA	3	66.6667	1	100	4	100	0	NA	2	0
A-1G;G120T	3e-07	8.55611e-06	20.584	8.42547	4.54916	1.5952	-16.0349	8.57515	14.5		A-1G;G120T	16	18.75	13	0	22	0	13	0	15	6.66667	23	0	9	11.1111	11	0	14	7.14286	15	20	10	0	13	7.69231	4	0
A-1G;G121A	0.196423	1.10909	14.8582	4.55941	100	352.067	85.1418	352.097	10.5		A-1G;G121A	18	11.1111	8	12.5	9	0	8	12.5	18	22.2222	15	20	11	54.5455	3	0	6	16.6667	5	0	15	26.6667	10	60	15	0
A-1G;G121C	2.38997e-05	6.38336e-05	5.34946	7.42398	28.0002	7.61834	22.6507	10.6374	2.66667		A-1G;G121C	8	0	3	0	4	25	0	NA	1	100	5	20	0	NA	2	50	2	0	2	50	3	0	2	0	2	0
A-1G;G121T	0.0311368	0.0454952	12.6382	3.2484	64.0563	29.0837	51.4182	29.2645	9.75		A-1G;G121T	12	8.33333	1	0	19	10.5263	7	14.2857	24	12.5	16	18.75	7	0	4	25	4	50	6	16.6667	8	62.5	9	44.4444	2	0
A-1G;A122C	6.09153e-05	0.00119833	0	340.868	28.2711	9.82305	28.2711	341.009	1.66667		A-1G;A122C	0	NA	0	NA	3	0	1	0	4	25	2	50	1	100	0	NA	3	0	3	0	2	50	1	0	0	NA
A-1G;A122G	0.000680823	0.00116011	4.87469	4.73733	23.9703	5.7617	19.0957	7.45919	20		A-1G;A122G	27	22.2222	20	5	21	0	15	6.66667	26	19.2308	32	21.875	18	22.2222	12	8.33333	11	27.2727	19	36.8421	20	15	19	21.0526	11	0
A-1G;A122T	0.00120621	0.00102153	8.25922	2.81081	31.5201	4.75582	23.2609	5.52435	24.3333		A-1G;A122T	30	6.66667	22	9.09091	32	6.25	25	16	35	14.2857	45	17.7778	22	22.7273	17	29.4118	8	25	17	47.0588	20	40	19	15.7895	25	0
A-1G;A123C	8.86757e-05	0.000286913	4.31454	17.0371	27.478	13.5215	23.1634	21.7507	3.75		A-1G;A123C	7	0	2	0	8	0	3	33.3333	3	100	3	66.6667	4	50	4	25	7	0	4	25	0	NA	0	NA	2	0
A-1G;A123G	0.00093748	0.000471855	2.31924	2.58597	50.7296	5.64479	48.4104	6.20894	24.75		A-1G;A123G	30	3.33333	19	5.26316	44	2.27273	25	16	31	29.0323	41	21.9512	16	56.25	22	45.4545	14	50	13	53.8462	22	40.9091	20	50	8	12.5
A-1G;A123T	0.00119416	0.000607873	4.82112	3.14715	64.085	6.35214	59.2639	7.08903	20.1667		A-1G;A123T	31	6.45161	18	0	30	16.6667	22	9.09091	31	25.8065	28	35.7143	7	42.8571	12	50	6	66.6667	15	40	25	56	17	82.3529	15	20
A-1G;A124C	0.0020624	0.00243053	12.6935	9.25252	69.4936	12.6478	56.8	15.6708	2.75		A-1G;A124C	3	33.3333	0	NA	5	0	2	0	0	NA	6	33.3333	1	100	7	42.8571	3	33.3333	2	100	1	100	3	66.6667	3	0
A-1G;A124G	0.000155523	0.000112769	2.08124	3.63719	40.8182	5.8875	38.737	6.92039	14.0833		A-1G;A124G	18	0	11	0	23	30.4348	27	18.5185	16	25	17	58.8235	10	20	4	25	8	50	6	33.3333	14	42.8571	15	40	15	0
A-1G;A124T	0.00035364	0.00026998	2.22903	2.85315	46.8806	7.77402	44.6516	8.28105	22.6667		A-1G;A124T	36	0	20	15	32	21.875	35	17.1429	25	20	36	30.5556	14	71.4286	9	11.1111	14	57.1429	12	50	16	43.75	23	56.5217	14	0
A-1G;G125A	0.000519801	0.000176394	8.67157	2.65416	64.2597	3.72	55.5881	4.56979	26.3333		A-1G;G125A	38	5.26316	18	22.2222	44	18.1818	19	26.3158	44	31.8182	36	50	23	56.5217	15	60	15	66.6667	21	61.9048	23	52.1739	20	75	22	9.09091
A-1G;G125C	0.00163516	0.00198006	8.24144	7.21847	55.7336	12.0958	47.4922	14.086	4		A-1G;G125C	5	0	2	0	6	0	4	0	6	33.3333	6	50	3	0	3	66.6667	0	NA	2	50	6	33.3333	5	80	6	0
A-1G;G125T	0.00189024	0.00132374	15.2836	6.47782	80.0426	7.92661	64.7589	10.2369	9.25		A-1G;G125T	10	10	9	11.1111	8	12.5	10	30	10	20	17	52.9412	6	50	11	45.4545	6	50	6	100	10	70	8	75	8	25
A-1G;T126A	0.000913567	0.000423851	6.39815	3.46638	65.9649	5.90728	59.5668	6.84922	15.5833		A-1G;T126A	24	4.16667	7	28.5714	27	7.40741	11	27.2727	24	20.8333	22	40.9091	14	64.2857	10	70	13	53.8462	9	55.5556	14	57.1429	12	75	17	11.7647
A-1G;T126C	0.00165069	0.00139032	2.59377	5.42102	70.9332	14.9182	68.3395	15.8726	7.75		A-1G;T126C	15	0	8	12.5	12	0	4	50	8	0	13	46.1538	12	50	6	83.3333	2	100	4	25	6	33.3333	3	100	3	0
A-1G;T126G	3.47869e-05	0.000175654	8.63646	11.9273	24.7056	8.85351	16.0691	14.8541	1.83333		A-1G;T126G	5	0	1	0	2	0	3	0	1	100	1	0	2	0	4	0	1	0	1	0	1	100	0	NA	1	0
A-1G;A127C	0.0249862	0.026856	12.1591	5.58643	100	33.333	87.8409	33.7979	1.08333		A-1G;A127C	1	0	0	NA	4	0	1	0	3	0	0	NA	0	NA	2	0	0	NA	1	100	0	NA	1	100	1	0
A-1G;A127G	0.00184386	0.00183651	6.02705	4.83149	48.5585	9.11338	42.5314	10.3149	11.75		A-1G;A127G	14	7.14286	12	8.33333	20	20	15	0	12	16.6667	19	26.3158	5	40	8	50	6	33.3333	10	60	9	55.5556	11	27.2727	6	0
A-1G;A127T	0.000525122	0.00038617	5.12188	4.18956	46.1948	6.43587	41.0729	7.67937	10.8333		A-1G;A127T	11	9.09091	11	0	24	8.33333	12	25	18	22.2222	18	38.8889	6	16.6667	6	50	4	75	2	50	11	36.3636	7	42.8571	9	0
A-1G;A128C	0.00057904	0.00133335	6.40717	8.45673	27.4637	10.9977	21.0565	13.8732	4.5		A-1G;A128C	8	0	2	0	5	0	2	50	7	0	15	26.6667	5	60	1	0	2	50	1	0	5	0	1	100	0	NA
A-1G;A128G	0.00104956	0.000642353	5.93098	2.16309	32.3191	3.88345	26.3881	4.44524	23.4167		A-1G;A128G	27	3.7037	25	8	31	6.45161	17	5.88235	34	11.7647	43	25.5814	19	15.7895	16	37.5	17	29.4118	14	28.5714	23	39.1304	15	20	14	21.4286
A-1G;A128T	0.00547526	0.00784317	7.47238	3.69619	36.631	10.4652	29.1586	11.0988	27.6667		A-1G;A128T	34	11.7647	13	30.7692	43	9.30233	27	3.7037	44	4.54545	39	10.2564	23	30.4348	17	47.0588	23	17.3913	20	30	26	26.9231	23	43.4783	16	12.5
A-1G;A129C	0.00124315	0.00150281	7.78993	10.3047	61.8495	12.4822	54.0596	16.1862	3.91667		A-1G;A129C	4	0	2	0	8	12.5	3	0	5	0	3	33.3333	2	100	2	100	4	25	4	50	7	71.4286	3	33.3333	0	NA
A-1G;A129G	0.00770136	0.0487166	6.52087	3.84151	12.4708	8.62018	5.94994	9.43741	13.5		A-1G;A129G	11	18.1818	9	0	20	10	9	22.2222	18	0	23	4.34783	10	20	9	0	7	14.2857	15	33.3333	20	5	11	9.09091	11	9.09091
A-1G;A129T	0.00681486	0.00528328	2.1869	1.40828	30.4716	6.51162	28.2847	6.66216	26		A-1G;A129T	24	0	22	0	53	7.54717	14	7.14286	33	0	43	6.97674	15	13.3333	19	15.7895	22	18.1818	18	27.7778	29	31.0345	20	20	17	5.88235
A-1G;C130A	3e-07	0.000105039	9.99038	6.07996	8.06552	1.55514	-1.92486	6.2757	6.66667		A-1G;C130A	4	0	3	0	9	0	5	0	10	0	14	7.14286	6	0	7	14.2857	7	14.2857	5	0	3	0	7	0	3	33.3333
A-1G;C130G	0.000102586	0.000402365	20.9851	16.3638	9.46941	4.44895	-11.5156	16.9578	3.83333		A-1G;C130G	2	0	0	NA	8	25	5	0	3	0	9	0	1	0	2	50	2	0	4	25	8	0	2	0	1	0
A-1G;C130T	1.18282	45.9226	4.43376	1.66392	100	3484.91	95.5662	3484.91	17.25		A-1G;C130T	20	0	15	0	22	18.1818	19	15.7895	17	0	25	4	12	0	10	0	14	0	13	15.3846	24	4.16667	16	12.5	7	0
A-1G;A131C	0.00154439	0.00521227	7.15752	4.71156	15.4758	6.06815	8.31825	7.68253	5.08333		A-1G;A131C	2	0	3	0	8	0	7	0	11	9.09091	7	0	7	28.5714	4	0	3	0	2	50	3	0	4	0	4	0
A-1G;A131G	0.00914388	0.0283063	2.5152	1.19741	7.90692	4.3893	5.39172	4.5497	20.8333		A-1G;A131G	27	0	20	10	28	7.14286	18	0	38	0	34	2.94118	14	7.14286	10	0	11	0	8	0	18	11.1111	24	4.16667	24	8.33333
A-1G;A131T	0.00299057	0.00350844	2.98716	2.0287	19.5244	5.20317	16.5373	5.58468	28.0833		A-1G;A131T	38	5.26316	19	0	29	0	25	8	38	5.26316	48	6.25	28	7.14286	16	18.75	18	22.2222	24	25	28	7.14286	26	34.6154	15	20
A-1G;G132A	3e-07	4.99866e-05	3.12541	3.18018	7.27735	1.74221	4.15195	3.62614	12.6667		A-1G;G132A	15	0	6	0	22	9.09091	15	0	16	12.5	19	5.26316	11	18.1818	5	0	16	6.25	12	0	9	0	6	16.6667	14	0
A-1G;G132C	0.00279659	0.002647	3.75455	3.3923	42.0995	11.1098	38.3449	11.6161	6.66667		A-1G;G132C	9	0	11	0	8	0	7	0	4	0	15	6.66667	9	44.4444	1	0	7	28.5714	4	75	3	33.3333	2	0	3	0
A-1G;G132T	7.98044e-05	0.000263098	4.76127	4.65912	11.1554	2.56403	6.39418	5.31805	18.1667		A-1G;G132T	21	4.7619	15	0	15	13.3333	21	9.52381	35	14.2857	22	4.54545	23	8.69565	14	14.2857	10	0	8	0	17	23.5294	17	17.6471	6	0
A-1G;A133C	0.000360604	0.00104651	37.9152	9.71549	20.6077	7.69939	-17.3074	12.3964	2.33333		A-1G;A133C	6	33.3333	3	33.3333	3	33.3333	3	33.3333	2	0	2	50	2	0	3	0	0	NA	2	0	0	NA	2	50	6	0
A-1G;A133G	0.000196038	0.000131717	3.78689	2.87219	37.1773	4.65729	33.3904	5.47173	11.0833		A-1G;A133G	16	0	10	10	21	14.2857	14	21.4286	14	21.4286	17	23.5294	7	28.5714	3	66.6667	7	57.1429	4	25	9	44.4444	11	27.2727	10	10
A-1G;A133T	0.000252061	0.000389284	2.19057	2.38469	12.6229	3.33681	10.4324	4.10135	18.25		A-1G;A133T	28	0	7	0	24	16.6667	17	0	23	8.69565	29	13.7931	18	22.2222	9	11.1111	11	0	16	18.75	17	11.7647	20	10	9	0
A-1G;G134A	0.0128939	0.0217286	29.9241	7.00981	77.548	24.2908	47.6239	25.282	12.25		A-1G;G134A	21	38.0952	7	42.8571	18	27.7778	9	55.5556	18	22.2222	19	26.3158	9	11.1111	7	57.1429	11	72.7273	12	75	10	40	6	83.3333	10	40
A-1G;G134C	0.000349976	0.000624503	18.479	12.5104	58.5104	14.9901	40.0314	19.5246	1.5		A-1G;G134C	3	0	3	33.3333	3	33.3333	2	0	4	50	0	NA	0	NA	1	100	0	NA	1	100	0	NA	1	0	0	NA
A-1G;G134T	0.000610117	0.0013182	41.308	8.06137	60.1496	6.47628	18.8416	10.3406	11.0833		A-1G;G134T	16	56.25	8	25	12	41.6667	8	25	12	58.3333	20	55	7	71.4286	7	71.4286	13	53.8462	8	75	13	53.8462	9	44.4444	8	25
A-1G;A135C	1.06086e-06	1.58744e-05	25.0085	19.5312	64.5652	5.58096	39.5567	20.3129	2.5		A-1G;A135C	1	0	1	100	5	40	1	100	5	80	5	40	2	100	1	100	3	66.6667	3	66.6667	2	50	1	100	4	25
A-1G;A135G	0.00105464	0.000994432	7.29339	5.90263	57.9214	8.6528	50.628	10.4744	10.6667		A-1G;A135G	13	7.69231	9	0	14	14.2857	14	7.14286	12	41.6667	11	45.4545	9	33.3333	3	0	8	75	12	58.3333	11	54.5455	12	66.6667	8	25
A-1G;A135T	0.00149963	0.0078777	66.3639	9.74295	76.4789	10.3757	10.115	14.233	13.8333		A-1G;A135T	17	82.3529	8	75	20	70	14	28.5714	18	50	18	88.8889	15	73.3333	6	66.6667	14	78.5714	13	69.2308	9	88.8889	14	71.4286	10	90
A-1G;G136A	0.0530748	0.268596	77.6054	5.79762	100	47.1865	22.3946	47.5413	7.83333		A-1G;G136A	3	33.3333	3	100	12	91.6667	2	50	18	77.7778	16	87.5	3	33.3333	5	60	6	83.3333	3	66.6667	15	93.3333	8	100	10	90
A-1G;G136C	0.0863109	0.59341	49.8613	10.2222	100	173.392	50.1387	173.693	1.25		A-1G;G136C	5	60	1	0	1	100	0	NA	2	50	0	NA	1	0	0	NA	1	100	0	NA	2	50	2	100	0	NA
A-1G;G136T	0.000360977	0.000656494	55.9651	11.627	82.0234	6.75074	26.0583	13.4446	9.33333		A-1G;G136T	10	80	7	28.5714	7	28.5714	9	77.7778	19	78.9474	11	72.7273	9	88.8889	8	87.5	5	60	7	85.7143	13	84.6154	7	85.7143	6	33.3333
A-1G;A137C	3e-07	2.52683e-05	25.0043	25.9775	53.6787	8.1343	28.6744	27.2213	1.83333		A-1G;A137C	1	0	3	66.6667	4	25	1	100	2	50	1	100	2	100	2	50	1	0	1	0	3	33.3333	1	100	1	100
A-1G;A137G	0.00158247	0.00183664	7.0994	6.4399	54.1578	11.6939	47.0584	13.3499	10.4167		A-1G;A137G	16	18.75	14	7.14286	19	10.5263	12	0	11	27.2727	12	16.6667	5	80	4	75	5	40	5	40	15	60	7	28.5714	4	0
A-1G;A137T	0.000335845	0.000361214	38.0779	11.98	86.5699	6.38032	48.4921	13.5731	12.75		A-1G;A137T	21	33.3333	8	75	16	25	13	76.9231	18	55.5556	16	87.5	8	62.5	5	80	9	88.8889	9	100	18	77.7778	12	83.3333	8	50
A-1G;G138A	1.64838e-06	3.18145e-05	40.6255	17.498	68.1178	5.695	27.4923	18.4014	13.0833		A-1G;G138A	15	40	3	66.6667	22	77.2727	8	37.5	15	33.3333	17	76.4706	13	53.8462	11	90.9091	14	71.4286	14	71.4286	14	71.4286	11	72.7273	4	0
A-1G;G138C	3e-07	4.03965e-05	10.025	15.6925	62.2351	12.1203	52.2101	19.8282	1.58333		A-1G;G138C	4	0	0	NA	3	100	1	100	3	33.3333	3	33.3333	1	100	2	100	1	100	1	0	0	NA	0	NA	2	0
A-1G;G138T	0.00373878	0.00513265	60.5513	8.21816	95.1267	6.39989	34.5754	10.4162	11.1667		A-1G;G138T	8	50	5	60	14	71.4286	10	80	16	37.5	22	77.2727	14	78.5714	5	80	4	100	11	81.8182	14	100	11	81.8182	15	66.6667
A-1G;A139C	0.0160398	0.0416365	8.81244	6.11583	72.489	34.5426	63.6766	35.0798	1.5		A-1G;A139C	2	0	0	NA	1	0	6	0	1	0	5	0	0	NA	0	NA	0	NA	0	NA	1	100	2	50	0	NA
A-1G;A139G	0.00211339	0.00109205	10.7991	4.22537	73.0537	6.77772	62.2546	7.98694	12.25		A-1G;A139G	17	5.88235	9	22.2222	16	18.75	10	10	12	8.33333	25	44	10	40	7	71.4286	6	66.6667	10	60	14	64.2857	11	81.8182	11	0
A-1G;A139T	0.00164533	0.00133738	28.1947	5.07484	69.305	6.47898	41.1102	8.22989	12.9167		A-1G;A139T	16	37.5	14	35.7143	22	27.2727	15	20	15	26.6667	16	56.25	13	61.5385	8	62.5	7	71.4286	4	75	16	56.25	9	77.7778	9	44.4444
A-1G;G140A	0.000773505	0.000620605	2.9267	3.93217	50.9111	10.7509	47.9845	11.4475	20.1667		A-1G;G140A	27	0	25	8	32	15.625	16	12.5	35	8.57143	24	62.5	19	63.1579	12	50	11	27.2727	10	60	15	40	16	43.75	19	0
A-1G;G140C	3e-07	0.000183763	72.9321	28.8431	60.0234	10.2089	-12.9087	30.5965	1.33333		A-1G;G140C	1	100	0	NA	4	50	0	NA	1	0	1	0	2	50	1	100	2	100	0	NA	2	100	2	50	0	NA
A-1G;G140T	0.000309819	0.000246266	17.5239	9.52448	78.2674	6.35053	60.7435	11.4475	12.6667		A-1G;G140T	15	20	11	9.09091	22	36.3636	16	56.25	16	50	15	66.6667	11	45.4545	5	40	6	100	13	84.6154	12	83.3333	10	70	8	25
A-1G;C141A	0.000717318	0.000335488	13.6992	3.94835	67.7527	4.7065	54.0535	6.14334	7.83333		A-1G;C141A	11	18.1818	6	0	11	27.2727	10	20	9	44.4444	15	46.6667	6	50	3	66.6667	3	66.6667	8	62.5	5	80	7	71.4286	7	14.2857
A-1G;C141G	0.00195893	0.00831239	32.2044	15.8389	54.7436	16.0345	22.5391	22.5383	2.75		A-1G;C141G	5	20	0	NA	5	40	3	66.6667	3	0	4	75	1	0	0	NA	2	50	4	50	2	100	4	25	7	57.1429
A-1G;C141T	0.000919156	0.000427477	14.3051	4.83425	71.5494	4.46829	57.2443	6.58298	22.9167		A-1G;C141T	25	16	14	28.5714	23	13.0435	19	15.7895	34	32.3529	38	52.6316	13	61.5385	15	80	15	53.3333	22	68.1818	21	76.1905	36	66.6667	16	12.5
A-1G;G142A	0.00182941	0.00162914	6.72058	3.13808	41.0992	7.78332	34.3786	8.39212	26.4167		A-1G;G142A	39	2.5641	24	29.1667	37	10.8108	33	6.06061	33	21.2121	38	18.4211	25	28	11	18.1818	20	35	18	44.4444	24	29.1667	15	60	24	4.16667
A-1G;G142C	0.00323315	0.0307168	48.5376	33.2929	23.8763	39.9778	-24.6612	52.0254	0.5		A-1G;G142C	0	NA	0	NA	1	0	1	100	0	NA	3	33.3333	0	NA	0	NA	0	NA	0	NA	0	NA	1	0	0	NA
A-1G;G142T	0.000587051	0.000395376	9.84154	8.72712	89.1996	7.18676	79.358	11.3054	9.58333		A-1G;G142T	15	6.66667	9	33.3333	13	15.3846	16	18.75	7	42.8571	9	55.5556	7	100	2	100	6	83.3333	10	50	12	75	9	100	7	28.5714
A-1G;A143C	3e-07	0.00832145	0.0728962	2.01147e+06	72.9151	14.0544	72.8422	2.01147e+06	0.666667		A-1G;A143C	0	NA	0	NA	1	100	0	NA	0	NA	3	100	1	0	1	100	1	100	0	NA	1	100	0	NA	0	NA
A-1G;A143G	0.000384734	0.000450502	16.5428	7.4949	55.8574	8.44815	39.3146	11.2936	10.0833		A-1G;A143G	16	12.5	10	10	16	37.5	6	33.3333	19	42.1053	21	38.0952	5	40	2	0	10	50	0	NA	9	77.7778	7	71.4286	7	14.2857
A-1G;A143T	0.0020702	0.00172381	20.4791	8.19173	89.765	9.00766	69.2859	12.1755	10.9167		A-1G;A143T	18	11.1111	7	42.8571	12	50	8	12.5	11	36.3636	20	35	4	75	6	50	8	100	12	83.3333	16	87.5	9	66.6667	6	66.6667
A-1G;A144C	0.00242173	0.00484338	20.3376	15.4143	71.3442	18.4463	51.0067	24.0389	1.5		A-1G;A144C	3	33.3333	0	NA	3	0	0	NA	3	33.3333	3	33.3333	1	0	0	NA	2	100	0	NA	2	100	1	0	0	NA
A-1G;A144G	0.00292784	0.00216031	14.1591	7.33509	93.791	9.60524	79.632	12.0857	11.8333		A-1G;A144G	18	11.1111	9	0	14	28.5714	13	23.0769	18	50	11	54.5455	16	25	7	57.1429	7	100	6	66.6667	13	69.2308	10	100	13	15.3846
A-1G;A144T	0.00033273	0.000220051	6.50612	7.68458	83.9077	5.50435	77.4016	9.45255	11.1667		A-1G;A144T	14	14.2857	10	0	12	33.3333	4	75	13	61.5385	15	53.3333	13	69.2308	7	71.4286	11	72.7273	10	80	16	81.25	9	100	6	33.3333
A-1G;C145A	0.00048703	0.000749669	22.0085	18.6893	79.3068	12.0813	57.2983	22.2541	4.16667		A-1G;C145A	6	16.6667	5	40	2	0	0	NA	5	20	9	88.8889	5	40	3	66.6667	5	100	2	50	4	25	4	100	6	16.6667
A-1G;C145G	0.00367609	0.00811241	19.4539	14.6966	69.2319	24.5824	49.7781	28.6406	1.08333		A-1G;C145G	2	0	0	NA	2	0	1	0	1	100	3	0	0	NA	1	100	0	NA	0	NA	2	50	1	100	0	NA
A-1G;C145T	0.00046081	0.000159824	7.1771	2.80711	70.0541	3.83635	62.877	4.75368	16.9167		A-1G;C145T	22	4.54545	25	8	19	21.0526	22	31.8182	18	44.4444	23	43.4783	17	58.8235	6	50	12	66.6667	10	80	17	64.7059	12	83.3333	18	0
A-1G;G146A	0.00117037	0.000676086	7.94798	3.94801	57.6439	6.04696	49.696	7.22167	38.4167		A-1G;G146A	56	12.5	35	14.2857	49	10.2041	38	5.26316	45	20	61	45.9016	24	50	21	61.9048	35	51.4286	24	54.1667	52	50	21	57.1429	28	10.7143
A-1G;G146C	0.000289615	0.000845176	7.40601	14.4736	33.2985	10.9526	25.8925	18.1506	4.25		A-1G;G146C	3	0	5	0	5	0	2	50	10	20	9	44.4444	4	0	2	0	1	100	2	100	2	0	6	16.6667	2	0
A-1G;G146T	0.00185645	0.00267516	13.9541	10.732	68.0922	14.6939	54.1381	18.1958	5.25		A-1G;G146T	3	0	3	0	10	10	8	25	2	50	11	36.3636	5	20	2	0	5	100	2	50	5	60	7	42.8571	5	0
A-1G;T147A	0.000854876	0.000732771	1.90281	4.20885	50.6283	8.84159	48.7255	9.79225	14.75		A-1G;T147A	27	7.40741	14	0	21	0	14	35.7143	19	21.0526	22	36.3636	9	33.3333	8	37.5	7	28.5714	9	66.6667	16	31.25	11	72.7273	14	7.14286
A-1G;T147C	0.000931058	0.000543139	4.42316	3.04744	53.3591	6.33326	48.9359	7.0283	11.25		A-1G;T147C	15	0	14	7.14286	17	17.6471	8	0	11	18.1818	15	33.3333	9	55.5556	9	44.4444	11	54.5455	4	50	15	60	7	28.5714	6	0
A-1G;T147G	3e-07	9.15953e-05	10.0078	14.1364	17.2431	6.13996	7.2353	15.4122	3.16667		A-1G;T147G	4	0	2	0	9	22.2222	1	0	5	0	6	0	2	0	4	75	0	NA	1	0	1	0	3	0	4	0
A-1G;G148A	0.00173792	0.00155709	13.724	4.61616	50.4538	7.38993	36.7299	8.71321	14.25		A-1G;G148A	23	13.0435	18	11.1111	15	26.6667	11	18.1818	14	7.14286	22	27.2727	14	57.1429	6	50	9	44.4444	8	62.5	19	42.1053	12	41.6667	16	12.5
A-1G;G148C	0.0155632	0.0237064	15.7236	9.02648	97.9329	49.099	82.2093	49.9218	2		A-1G;G148C	3	0	0	NA	2	0	1	0	0	NA	7	42.8571	4	0	2	50	1	100	3	66.6667	1	100	0	NA	0	NA
A-1G;G148T	0.00120705	0.00118177	5.20857	7.74072	66.2515	13.87	61.043	15.8838	4.33333		A-1G;G148T	5	0	3	0	8	0	7	28.5714	5	0	5	80	6	33.3333	3	33.3333	2	100	3	66.6667	3	66.6667	2	50	4	0
A-1G;G149A	3e-07	2.81535e-05	29.9907	11.5423	15.1865	3.28513	-14.8042	12.0007	3.25		A-1G;G149A	4	25	1	0	5	0	3	0	3	0	3	0	7	28.5714	2	0	3	33.3333	1	0	2	0	5	0	1	0
A-1G;G149C	4.42057e-05	0.000142742	11.381	21.8005	41.9955	13.1958	30.6145	25.4832	2		A-1G;G149C	3	0	1	0	3	0	2	100	1	100	6	16.6667	3	33.3333	0	NA	2	50	1	100	0	NA	2	0	0	NA
A-1G;G149T	0.00236452	0.00221832	4.27873	4.57624	55.9513	11.8095	51.6726	12.6651	11.25		A-1G;G149T	17	0	8	0	11	18.1818	15	6.66667	8	25	18	11.1111	9	22.2222	9	44.4444	4	100	11	36.3636	9	33.3333	16	50	15	6.66667
A-1G;G150A	0.00115857	0.000601731	4.58394	1.31488	24.4333	2.28962	19.8494	2.64031	76.25		A-1G;G150A	108	8.33333	57	3.50877	89	3.37079	60	5	82	14.6341	137	16.0584	64	15.625	44	20.4545	74	21.6216	61	26.2295	62	20.9677	77	24.6753	75	5.33333
A-1G;G150C	0.000619978	0.00113938	5.99389	6.27212	27.3585	6.96977	21.3646	9.37642	8.5		A-1G;G150C	9	11.1111	7	0	11	0	9	22.2222	13	15.3846	13	15.3846	5	20	5	40	6	16.6667	6	16.6667	10	10	8	62.5	2	50
A-1G;G150T	0.00471263	0.00319623	8.4152	2.12741	41.0534	5.66322	32.6382	6.04962	37.1667		A-1G;G150T	44	4.54545	22	9.09091	50	10	37	16.2162	42	7.14286	60	20	32	18.75	25	20	28	25	33	48.4848	36	38.8889	37	35.1351	20	5
A-1G;G151A	0.000478661	0.000130881	9.89944	2.20896	64.6341	2.71568	54.7346	3.50063	92.4167		A-1G;G151A	118	7.62712	83	22.8916	145	18.6207	75	25.3333	112	40.1786	145	49.6552	75	53.3333	54	53.7037	63	57.1429	59	71.1864	89	67.4157	91	63.7363	75	16
A-1G;G151C	0.00193565	0.00088113	28.0875	3.44736	76.2965	4.11334	48.209	5.36692	46.9167		A-1G;G151C	55	27.2727	40	37.5	67	31.3433	42	21.4286	72	43.0556	76	46.0526	36	63.8889	28	60.7143	35	62.8571	24	66.6667	53	79.2453	35	74.2857	32	31.25
A-1G;G151T	0.000636468	0.000307736	1.89105	3.13597	63.6678	6.21764	61.7768	6.96372	22.8333		A-1G;G151T	35	2.85714	16	0	44	6.81818	21	9.52381	27	44.4444	27	55.5556	21	38.0952	12	33.3333	16	68.75	11	72.7273	21	71.4286	23	56.5217	22	18.1818
A-1G;T152A	0.000809597	0.000364307	19.6122	2.72957	53.8736	2.85364	34.2614	3.94889	73.9167		A-1G;T152A	77	19.4805	58	22.4138	119	24.3697	57	19.2982	100	37	123	42.2764	53	39.6226	40	57.5	43	41.8605	67	55.2239	72	51.3889	78	56.4103	57	17.5439
A-1G;T152C	0.000907738	0.000468344	15.1536	4.8364	70.7617	5.39577	55.6081	7.24604	65.6667		A-1G;T152C	75	14.6667	53	28.3019	94	19.1489	58	18.9655	90	31.1111	111	54.0541	52	61.5385	56	66.0714	43	55.814	35	62.8571	57	82.4561	64	54.6875	38	36.8421
A-1G;T152G	0.0251693	0.0269644	16.302	2.36842	53.6002	15.6656	37.2982	15.8436	15.1667		A-1G;T152G	13	15.3846	7	28.5714	24	16.6667	7	0	26	19.2308	26	15.3846	13	23.0769	9	22.2222	21	23.8095	9	33.3333	17	47.0588	10	40	6	16.6667
A-1G;T153A	0.00061782	0.000239721	22.1025	2.4306	55.9187	2.33258	33.8163	3.36879	127		A-1G;T153A	169	23.0769	94	19.1489	149	29.5302	104	30.7692	198	37.8788	184	44.5652	86	52.3256	97	43.299	111	62.1622	93	52.6882	124	56.4516	115	54.7826	99	18.1818
A-1G;T153C	0.000684431	0.000312081	17.3669	3.50444	61.8756	3.8998	44.5087	5.24305	101.417		A-1G;T153C	135	15.5556	68	29.4118	160	22.5	100	28	139	30.2158	163	49.0798	80	58.75	50	70	58	67.2414	60	58.3333	118	51.6949	86	60.4651	73	24.6575
A-1G;T153G	0.00284659	0.00146877	15.5551	2.01396	46.631	3.65523	31.0759	4.17333	46.3333		A-1G;T153G	53	18.8679	40	15	62	16.129	47	14.8936	67	19.403	83	28.9157	35	25.7143	23	47.8261	26	30.7692	31	41.9355	48	47.9167	41	46.3415	23	8.69565
A-1G;T154A	0.000369851	0.000177973	12.5374	3.92284	57.8231	3.57161	45.2857	5.30519	84.8333		A-1G;T154A	92	16.3043	72	11.1111	115	22.6087	90	28.8889	99	40.404	142	49.2958	65	46.1538	45	57.7778	72	63.8889	48	72.9167	98	48.9796	80	50	63	9.52381
A-1G;T154C	0.00147688	0.0010401	2.07107	1.1515	19.5674	3.27273	17.4963	3.4694	107.167		A-1G;T154C	152	3.28947	70	0	169	5.32544	113	6.19469	141	6.38298	173	10.4046	55	10.9091	66	10.6061	94	14.8936	61	21.3115	94	31.9149	98	15.3061	73	4.10959
A-1G;T154G	0.00510805	0.00608808	15.0028	2.96219	37.765	6.59999	22.7622	7.23425	29.8333		A-1G;T154G	33	9.09091	23	13.0435	36	19.4444	40	15	28	17.8571	35	28.5714	35	17.1429	21	23.8095	16	31.25	32	28.125	36	50	23	26.087	27	18.5185
A-1G;G155A	0.00052716	0.000236688	36.2421	4.01334	78.2681	2.76674	42.0259	4.87461	136.917		A-1G;G155A	154	40.2597	109	31.1927	189	44.9735	117	48.7179	185	51.8919	198	70.202	137	68.6131	101	82.1782	91	80.2198	90	78.8889	156	69.8718	116	76.7241	88	37.5
A-1G;G155C	0.00134074	0.000490104	25.2409	3.29595	81.6769	3.06687	56.4361	4.50211	45.5		A-1G;G155C	57	28.0702	31	19.3548	67	29.8507	43	34.8837	51	43.1373	56	51.7857	29	58.6207	36	63.8889	36	86.1111	42	78.5714	58	81.0345	40	72.5	39	15.3846
A-1G;G155T	0.000192382	0.00021218	30.9814	16.8675	89.2638	7.01739	58.2824	18.269	9.08333		A-1G;G155T	14	42.8571	12	33.3333	7	14.2857	10	70	7	100	14	50	5	100	9	66.6667	5	100	8	75	9	88.8889	9	100	6	50
A-1G;T156A	0.000422331	0.000135721	11.3994	2.56237	61.4536	2.78244	50.0542	3.78255	132.917		A-1G;T156A	155	9.03226	114	19.2982	187	21.9251	114	34.2105	158	33.5443	211	46.4455	122	59.0164	77	59.7403	98	66.3265	98	63.2653	138	52.1739	123	63.4146	101	15.8416
A-1G;T156C	0.000413684	0.00042933	2.90568	2.39371	18.2649	3.5601	15.3592	4.29001	86.0833		A-1G;T156C	138	3.62319	65	3.07692	125	4	88	5.68182	136	11.0294	129	24.8062	61	24.5902	41	12.1951	49	14.2857	59	6.77966	75	25.3333	67	25.3731	71	7.04225
A-1G;T156G	0.00298515	0.00243481	14.0686	3.89562	55.8165	7.64727	41.7479	8.58234	11.9167		A-1G;T156G	17	5.88235	5	0	19	26.3158	8	25	21	23.8095	21	23.8095	8	37.5	4	25	10	40	4	25	17	58.8235	9	66.6667	3	0
A-1G;T157A	0.000321022	0.000353355	18.7135	12.3996	75.8304	7.87177	57.1169	14.6873	10.5		A-1G;T157A	18	33.3333	5	20	17	11.7647	2	50	7	85.7143	16	62.5	12	83.3333	3	66.6667	10	90	9	77.7778	9	66.6667	18	55.5556	8	12.5
A-1G;T157C	0.000875587	0.00135358	14.4019	10.8367	58.6063	12.3161	44.2043	16.4048	1.58333		A-1G;T157C	2	0	3	0	1	0	1	0	4	25	3	33.3333	0	NA	1	100	1	0	0	NA	2	100	1	0	0	NA
A-1G;T157G	4.73343e-05	6.31855e-05	100	39.4066	14.038	11.2284	-85.962	40.9751	4.25		A-1G;T157G	3	66.6667	5	100	5	40	6	0	7	0	7	14.2857	2	0	1	0	5	20	2	100	3	0	5	40	1	0
A-1G;C158A	0.000834589	0.000564712	46.3106	4.86443	79.7954	3.3301	33.4848	5.89511	81.75		A-1G;C158A	92	38.0435	53	62.2642	96	51.0417	75	52	104	56.7308	121	71.9008	63	60.3175	67	77.6119	75	73.3333	51	74.5098	96	77.0833	88	85.2273	39	43.5897
A-1G;C158G	0.000350406	0.00042391	28.0043	7.70571	59.6674	5.69002	31.663	9.57885	13.8333		A-1G;C158G	21	23.8095	9	33.3333	15	40	13	38.4615	19	42.1053	18	50	13	69.2308	11	45.4545	8	62.5	8	87.5	21	52.381	10	40	10	20
A-1G;C158T	0.000672166	0.000336851	27.7949	5.07805	78.2004	3.83624	50.4055	6.36422	64		A-1G;C158T	70	32.8571	45	31.1111	93	30.1075	37	32.4324	88	51.1364	95	63.1579	77	64.9351	46	78.2609	48	85.4167	55	81.8182	60	65	54	66.6667	50	40
A-1G;T159A	0.00234776	0.00260863	60.7884	3.89093	80.6113	3.89799	19.8229	5.5076	76.75		A-1G;T159A	92	69.5652	51	54.902	87	59.7701	61	47.541	94	68.0851	130	67.6923	72	70.8333	48	81.25	63	68.254	59	81.3559	80	82.5	84	77.381	45	62.2222
A-1G;T159C	0.000854203	0.000618481	32.3048	5.48266	69.672	4.71272	37.3672	7.22975	42.25		A-1G;T159C	44	38.6364	29	27.5862	50	36	48	33.3333	54	55.5556	76	51.3158	47	57.4468	22	77.2727	28	75	24	50	55	63.6364	30	76.6667	22	50
A-1G;T159G	0.00700928	0.0248795	16.0173	7.85238	38.2697	22.7495	22.2524	24.0665	6.5		A-1G;T159G	4	0	2	50	11	18.1818	7	0	7	71.4286	13	7.69231	4	25	10	30	6	16.6667	5	40	5	40	4	25	5	20
A-1G;C160A	3.78441e-05	0.000126336	81.2089	4.13547	85.8232	1.44174	4.61423	4.37959	93.25		A-1G;C160A	97	81.4433	58	82.7586	125	83.2	81	83.9506	111	90.0901	157	87.2611	80	85	65	72.3077	81	87.6543	83	83.1325	88	86.3636	93	83.871	64	81.25
A-1G;C160G	0.00661111	0.0603301	74.2427	7.71967	80.8219	14.7539	6.57922	16.6514	10.1667		A-1G;C160G	13	76.9231	5	100	13	61.5385	2	50	10	80	24	75	10	60	11	54.5455	7	100	4	100	12	58.3333	11	81.8182	10	80
A-1G;C160T	0.000354809	0.000333808	52.9461	7.96062	87.2953	3.80573	34.3493	8.82355	45		A-1G;C160T	51	50.9804	37	62.1622	57	59.6491	39	61.5385	53	67.9245	71	87.3239	45	66.6667	28	85.7143	37	94.5946	40	90	42	85.7143	40	70	29	72.4138
A-1G;T161A	3e-07	2.59951e-05	85.0006	2.99211	89.3157	0.995379	4.3151	3.15333	69.8333		A-1G;T161A	89	85.3933	46	89.1304	87	90.8046	61	91.8033	89	91.0112	102	85.2941	53	90.566	49	93.8776	58	91.3793	53	88.6792	65	90.7692	86	83.7209	46	80.4348
A-1G;T161C	1.05842	342.411	77.9053	4.95532	100	6557.18	22.0947	6557.18	31.5		A-1G;T161C	27	62.963	27	77.7778	42	64.2857	28	71.4286	37	94.5946	50	64	21	71.4286	18	77.7778	25	88	31	77.4194	32	59.375	40	85	22	77.2727
A-1G;T161G	0.339111	3.9782	89.2551	3.74267	0	852.978	-89.2551	852.987	6.5		A-1G;T161G	11	100	7	57.1429	13	84.6154	4	75	6	83.3333	8	100	4	100	4	100	6	83.3333	4	100	5	80	6	50	3	33.3333
A-1G;C162A	0.000500355	0.000417753	75.4016	5.00345	96.4495	2.17254	21.0479	5.45476	31.4167		A-1G;C162A	28	85.7143	25	72	42	71.4286	32	78.125	54	88.8889	61	86.8852	23	100	18	94.4444	19	94.7368	13	100	39	97.4359	23	91.3043	20	85
A-1G;C162G	0.00278133	0.00569085	75.1911	6.88839	92.4806	5.75887	17.2895	8.97856	2.16667		A-1G;C162G	0	NA	2	100	1	100	2	50	6	83.3333	3	100	2	100	2	100	2	100	0	NA	6	100	0	NA	2	50
A-1G;C162T	0.000942782	0.00040313	23.6264	6.06869	94.1637	3.56352	70.5373	7.03759	27.5		A-1G;C162T	34	23.5294	20	30	41	24.3902	27	29.6296	42	61.9048	52	67.3077	14	50	23	78.2609	22	81.8182	16	87.5	20	100	19	89.4737	22	18.1818
A-1G;T163A	0.000846522	0.000668264	48.6791	7.622	91.0956	4.3141	42.4165	8.75822	26.8333		A-1G;T163A	35	40	26	46.1538	28	71.4286	11	63.6364	36	50	47	80.8511	21	76.1905	28	82.1429	18	94.4444	12	91.6667	39	94.8718	21	71.4286	26	53.8462
A-1G;T163C	0.000692579	0.00150131	64.0098	9.93172	85.2909	7.14258	21.2812	12.2334	10.5833		A-1G;T163C	11	72.7273	9	77.7778	15	53.3333	11	72.7273	15	53.3333	14	78.5714	9	100	5	80	14	64.2857	5	80	10	90	9	88.8889	6	50
A-1G;T163G	0.00855457	0.0972755	59.953	8.89229	79.8595	99.6425	19.9066	100.038	1.08333		A-1G;T163G	4	75	0	NA	0	NA	2	50	2	50	0	NA	0	NA	1	100	4	75	0	NA	0	NA	0	NA	0	NA
A-1G;T164A	0.000736449	0.000553243	30.1904	6.65232	77.9703	5.81455	47.78	8.83529	16.3333		A-1G;T164A	20	25	21	33.3333	24	33.3333	22	45.4545	16	56.25	30	66.6667	8	25	10	70	4	75	9	77.7778	17	82.3529	15	86.6667	17	35.2941
A-1G;T164C	0.00193662	0.0012691	9.79021	3.45537	53.806	6.56337	44.0158	7.41737	18.75		A-1G;T164C	28	10.7143	12	8.33333	24	16.6667	23	4.34783	34	26.4706	20	35	20	25	8	50	13	53.8462	11	54.5455	13	53.8462	19	47.3684	10	10
A-1G;T164G	NA	NA	NA	NA	NA	NA	NA	NA	0.166667		A-1G;T164G	0	NA	0	NA	0	NA	0	NA	0	NA	0	NA	1	0	0	NA	0	NA	1	0	0	NA	0	NA	0	NA
A-1G;T165A	0.00128989	0.00126434	4.81587	10.4661	85.0288	12.5038	80.213	16.3059	7.16667		A-1G;T165A	9	11.1111	9	11.1111	9	11.1111	10	0	14	42.8571	4	50	6	50	2	100	7	100	0	NA	4	25	12	75	9	44.4444
A-1G;T165C	0.00134937	0.00176034	38.8952	7.62965	72.0327	7.6349	33.1375	10.7937	9.25		A-1G;T165C	13	38.4615	7	28.5714	12	58.3333	5	20	13	53.8462	16	43.75	5	60	8	87.5	5	80	9	66.6667	14	71.4286	4	50	6	16.6667
A-1G;T165G	0.00138286	0.00610191	83.3401	28.889	53.2716	28.951	-30.0685	40.8991	0.5		A-1G;T165G	1	100	0	NA	0	NA	0	NA	2	100	1	100	0	NA	1	0	0	NA	0	NA	1	100	0	NA	0	NA
A-1G;A166C	0.000460978	0.000717397	11.3919	14.75	77.0415	20.368	65.6496	25.1479	0.916667		A-1G;A166C	2	0	2	0	0	NA	2	0	0	NA	1	100	2	100	0	NA	0	NA	0	NA	2	50	0	NA	0	NA
A-1G;A166G	0.000625265	0.000545676	11.7084	7.72755	67.4719	8.18766	55.7635	11.2585	7.08333		A-1G;A166G	9	11.1111	5	0	13	23.0769	8	12.5	7	57.1429	10	60	9	33.3333	2	50	4	50	3	100	6	50	9	77.7778	10	0
A-1G;A166T	1.33843e-05	6.45856e-05	9.74341	5.71655	15.8343	2.85569	6.09087	6.39014	2.83333		A-1G;A166T	4	0	4	0	4	25	6	16.6667	2	0	5	0	3	0	1	0	2	0	0	NA	1	0	2	0	3	0
A-1G;T167A	0.00150459	0.000661373	8.52636	4.33594	80.4728	6.5446	71.9464	7.85062	12.8333		A-1G;T167A	11	0	9	33.3333	19	21.0526	12	8.33333	22	22.7273	27	44.4444	11	54.5455	5	80	7	57.1429	9	88.8889	10	70	12	83.3333	7	0
A-1G;T167C	0.0242356	0.0310053	17.8934	4.8126	79.9709	28.3035	62.0774	28.7097	5.5		A-1G;T167C	7	14.2857	3	0	8	25	5	20	5	0	9	44.4444	4	0	5	40	5	40	4	50	7	57.1429	4	75	7	0
A-1G;T167G	0.00341662	0.00403977	30.5942	9.83413	95.1679	9.71965	64.5738	13.8268	2.91667		A-1G;T167G	5	80	3	0	3	0	1	0	2	50	4	50	3	66.6667	1	100	1	100	1	100	7	100	4	100	0	NA
A-1G;T168A	0.000165149	0.000166593	20.1386	5.59383	49.4854	4.60328	29.3467	7.24439	14.5		A-1G;T168A	27	18.5185	13	23.0769	19	31.5789	15	40	18	27.7778	22	59.0909	7	42.8571	7	57.1429	22	54.5455	7	28.5714	10	40	7	57.1429	6	0
A-1G;T168C	0.000640829	0.000353211	3.71188	3.98205	70.7293	8.56515	67.0174	9.44556	7		A-1G;T168C	13	0	3	33.3333	7	0	8	25	15	33.3333	11	36.3636	5	80	6	83.3333	9	66.6667	2	50	5	60	0	NA	1	100
A-1G;T168G	0.00017595	0.00031656	12.1057	16.2742	55.6071	11.6753	43.5014	20.029	3.83333		A-1G;T168G	4	0	3	33.3333	10	20	4	25	3	33.3333	6	66.6667	3	100	3	0	4	50	2	50	0	NA	4	75	4	0
A-1G;T169A	0.00164886	0.00073542	15.3647	4.68988	85.4681	5.34544	70.1034	7.11117	20.5833		A-1G;T169A	22	18.1818	18	16.6667	32	12.5	16	18.75	25	48	37	43.2432	23	60.8696	10	50	15	86.6667	20	65	14	85.7143	15	93.3333	20	15
A-1G;T169C	0.000585142	0.00078569	20.2719	12.216	75.2893	10.8115	55.0174	16.3132	8.66667		A-1G;T169C	10	40	13	15.3846	10	10	8	62.5	7	42.8571	15	60	9	33.3333	6	100	7	57.1429	2	100	10	70	7	57.1429	5	20
A-1G;T169G	0.00112262	0.00118969	21.1325	12.5813	84.5814	13.4793	63.4489	18.4385	3.5		A-1G;T169G	2	0	2	0	9	44.4444	0	NA	6	16.6667	5	40	7	85.7143	3	100	0	NA	0	NA	2	100	6	66.6667	3	0
A-1G;T170A	0.000654869	0.000462471	17.2008	7.94623	76.4603	6.29201	59.2596	10.1357	13.75		A-1G;T170A	19	31.5789	8	12.5	11	9.09091	14	21.4286	22	54.5455	17	52.9412	11	72.7273	9	77.7778	16	87.5	8	62.5	14	57.1429	16	75	7	28.5714
A-1G;T170C	0.000806796	0.000848263	25.8143	7.85129	67.5566	7.13094	41.7422	10.6063	7.5		A-1G;T170C	6	33.3333	7	28.5714	13	15.3846	10	50	7	57.1429	11	36.3636	10	60	1	100	1	100	9	77.7778	6	50	9	66.6667	4	25
A-1G;T170G	0.000349717	0.000248808	13.9558	7.64049	79.2417	6.95585	65.2859	10.3325	3.08333		A-1G;T170G	5	0	1	0	8	50	4	25	4	50	3	33.3333	2	100	1	100	1	100	2	100	3	66.6667	3	100	3	33.3333
A-1G;T171A	0.000155532	0.000150238	21.9035	15.0272	86.3326	5.16955	64.4291	15.8916	9.08333		A-1G;T171A	7	14.2857	2	50	3	66.6667	8	37.5	7	57.1429	18	88.8889	10	90	9	100	9	77.7778	4	75	16	62.5	16	87.5	3	66.6667
A-1G;T171C	0.00158938	0.00140127	5.43119	2.38279	36.2889	7.8985	30.8577	8.25009	31.3333		A-1G;T171C	60	5	40	7.5	71	4.22535	36	13.8889	53	13.2075	36	22.2222	16	12.5	12	16.6667	14	64.2857	14	42.8571	12	25	12	25	53	3.77358
A-1G;T171G	0.00409527	0.00663709	38.4477	8.76748	83.5978	14.2392	45.1501	16.722	6.83333		A-1G;T171G	9	77.7778	6	16.6667	13	23.0769	8	25	8	50	9	55.5556	7	57.1429	4	75	3	66.6667	7	85.7143	4	50	4	100	4	0
A-1G;T172A	3e-07	2.15583e-05	75.0043	16.9796	87.2702	2.80391	12.2659	17.2096	4.58333		A-1G;T172A	1	100	4	100	8	87.5	3	100	6	66.6667	9	77.7778	1	100	2	100	6	100	5	100	6	100	4	100	2	50
A-1G;T172C	0.033957	0.0816154	37.5621	5.74071	85.5431	45.0497	47.981	45.414	22.0833		A-1G;T172C	33	30.303	18	50	42	33.3333	24	37.5	30	46.6667	37	48.6486	14	28.5714	12	41.6667	15	26.6667	9	44.4444	13	92.3077	18	50	19	26.3158
A-1G;T172G	0.219694	7.26311	57.035	15.7349	0	1358.05	-57.035	1358.14	1.25		A-1G;T172G	1	0	3	100	0	NA	0	NA	2	0	5	60	0	NA	0	NA	1	100	0	NA	2	50	1	0	1	100
A-1G;T173A	3.33815e-05	0.000202198	91.0092	4.53574	93.821	1.21528	2.81188	4.69573	7.83333		A-1G;T173A	5	100	3	100	6	100	6	100	13	100	9	100	7	100	1	100	15	93.3333	12	91.6667	7	100	10	100	2	100
A-1G;T173C	5.44358e-06	1.45112e-05	27.777	11.8307	83.5538	3.5214	55.7768	12.3437	5.83333		A-1G;T173C	8	25	1	100	1	100	4	100	5	80	10	60	8	87.5	6	100	8	75	4	75	11	90.9091	4	100	4	50
A-1G;T173G	4.7951e-05	0.000272885	0	325.31	80.8309	6.88246	80.8309	325.382	1.33333		A-1G;T173G	0	NA	0	NA	1	0	2	100	3	100	3	66.6667	1	100	1	100	1	100	1	100	1	100	2	100	0	NA
A-1T;T1A	0.000409804	0.00017806	5.76371	3.44324	63.1171	4.78099	57.3534	5.89184	48		A-1T;T1A	72	6.94444	42	7.14286	77	11.6883	50	38	66	33.3333	61	45.9016	38	73.6842	17	58.8235	30	60	32	68.75	59	61.0169	32	46.875	37	2.7027
A-1T;T1C	0.000491152	0.000247381	3.4999	3.44358	68.0029	7.24701	64.503	8.02355	26.5		A-1T;T1C	57	3.50877	21	4.7619	42	9.52381	19	26.3158	45	28.8889	44	61.3636	12	83.3333	11	36.3636	17	64.7059	13	46.1538	20	55	17	82.3529	18	16.6667
A-1T;T1G	0.000597289	0.000654675	6.0616	6.14691	51.8882	9.26699	45.8266	11.1203	4.91667		A-1T;T1G	8	0	6	0	6	16.6667	9	11.1111	4	25	4	50	4	50	4	25	6	16.6667	2	50	2	100	4	75	6	16.6667
A-1T;C2A	0.0008898	0.000450396	5.08957	2.74294	51.327	5.57498	46.2375	6.21322	37.4167		A-1T;C2A	43	2.32558	24	12.5	63	9.52381	31	16.129	52	25	68	25	37	40.5405	23	69.5652	31	38.7097	23	39.1304	28	50	26	57.6923	23	0
A-1T;C2G	0.00117394	0.00160475	8.82001	4.21027	33.0898	8.06114	24.2698	9.09441	6.08333		A-1T;C2G	13	15.3846	2	0	10	0	12	16.6667	4	0	13	23.0769	5	40	6	16.6667	1	0	2	50	4	25	1	0	0	NA
A-1T;C2T	0.00103413	0.000474015	5.85541	3.14068	60.1913	5.5288	54.3359	6.35858	34.4167		A-1T;C2T	50	8	22	4.54545	48	6.25	34	17.6471	53	22.6415	55	34.5455	27	62.963	15	26.6667	27	66.6667	20	50	32	59.375	30	60	25	0
A-1T;T3A	0.000791121	0.000616861	3.37104	3.35239	38.2979	6.26202	34.9268	7.10291	40.6667		A-1T;T3A	43	2.32558	19	5.26316	63	4.7619	39	15.3846	41	14.6341	83	21.6867	54	48.1481	22	13.6364	30	46.6667	29	31.0345	37	29.7297	28	53.5714	23	13.0435
A-1T;T3C	0.00183441	0.00166788	8.61535	1.83744	24.0504	3.22784	15.435	3.71418	34.4167		A-1T;T3C	50	6	23	4.34783	47	14.8936	30	13.3333	42	9.52381	42	14.2857	37	16.2162	26	19.2308	26	23.0769	27	14.8148	32	31.25	31	22.5806	23	4.34783
A-1T;T3G	0.000946799	0.00139356	6.42123	10.4729	61.1524	18.099	54.7311	20.9106	5.91667		A-1T;T3G	12	41.6667	3	0	11	0	7	0	14	57.1429	5	20	3	66.6667	1	100	7	57.1429	4	50	4	50	0	NA	2	0
A-1T;A4C	3e-07	0.002746	58.3482	30.085	58.7272	9.54581	0.378953	31.5631	4.25		A-1T;A4C	5	60	3	33.3333	4	100	2	0	11	54.5455	6	33.3333	3	33.3333	6	50	3	33.3333	2	50	2	50	4	100	1	100
A-1T;A4G	0.000546989	0.00037791	2.16653	2.56609	45.3144	7.02911	43.1479	7.48286	27.6667		A-1T;A4G	38	0	31	16.129	35	8.57143	26	11.5385	38	21.0526	48	35.4167	17	17.6471	14	57.1429	19	52.6316	20	70	20	35	26	30.7692	23	8.69565
A-1T;A4T	0.000736674	0.000661557	9.56562	5.29404	48.3234	6.68675	38.7578	8.52875	53.6667		A-1T;A4T	76	22.3684	33	3.0303	70	14.2857	40	10	67	28.3582	97	43.299	39	35.8974	35	28.5714	42	52.381	34	29.4118	60	61.6667	51	45.098	33	6.06061
A-1T;G5A	0.00136458	0.000867357	13.2034	4.09871	62.408	6.58056	49.2045	7.75262	34.4167		A-1T;G5A	57	21.0526	20	5	66	13.6364	28	25	42	28.5714	43	25.5814	34	55.8824	20	60	23	73.913	13	69.2308	25	52	42	52.381	22	18.1818
A-1T;G5C	0.000663828	0.000572239	2.73181	4.05479	42.6746	7.4423	39.9428	8.47521	11.0833		A-1T;G5C	15	0	6	16.6667	13	0	13	15.3846	16	25	15	20	12	33.3333	8	62.5	7	57.1429	9	22.2222	9	22.2222	10	60	7	42.8571
A-1T;G5T	0.00123763	0.00144946	12.1973	6.02434	51.3506	9.39209	39.1533	11.1581	19.5833		A-1T;G5T	25	8	13	7.69231	36	16.6667	19	15.7895	24	37.5	30	30	16	43.75	11	9.09091	15	66.6667	7	71.4286	23	60.8696	16	43.75	12	0
A-1T;T6A	0.000891819	0.000237432	8.60828	2.21335	74.6538	3.53403	66.0455	4.16993	51.5833		A-1T;T6A	88	6.81818	38	10.5263	77	15.5844	36	33.3333	66	28.7879	91	49.4505	44	56.8182	29	48.2759	41	73.1707	21	80.9524	42	73.8095	46	76.087	33	9.09091
A-1T;T6C	0.00056537	0.000176731	6.38548	2.01624	59.2466	3.48181	52.8611	4.02346	48.25		A-1T;T6C	83	6.0241	30	3.33333	83	20.4819	54	18.5185	60	35	72	40.2778	29	41.3793	29	51.7241	30	63.3333	35	51.4286	36	63.8889	38	63.1579	34	0
A-1T;T6G	0.001203	0.00092905	16.3281	7.38331	80.6236	9.07778	64.2955	11.7013	5.25		A-1T;T6G	8	12.5	8	12.5	8	12.5	6	50	9	22.2222	10	60	2	50	0	NA	3	66.6667	2	50	5	100	2	50	5	20
A-1T;T7A	0.000725364	0.000225408	6.57967	2.41326	65.1483	3.60522	58.5686	4.33837	50.1667		A-1T;T7A	76	6.57895	27	14.8148	64	7.8125	50	24	66	37.8788	83	38.5542	33	51.5152	39	61.5385	37	70.2703	39	69.2308	45	62.2222	43	55.814	47	2.12766
A-1T;T7C	0.000909954	0.00033621	7.89534	2.74493	63.1024	4.47923	55.2071	5.2534	70.5		A-1T;T7C	82	15.8537	71	9.85915	121	8.26446	90	22.2222	105	26.6667	107	42.9907	47	57.4468	34	47.0588	57	66.6667	37	59.4595	53	56.6038	42	59.5238	54	0
A-1T;T7G	0.00101894	0.000373255	6.84462	3.04839	76.2584	5.24152	69.4137	6.06352	7.33333		A-1T;T7G	10	0	4	0	14	14.2857	6	33.3333	16	25	10	40	2	50	5	80	8	75	2	100	9	77.7778	2	50	5	20
A-1T;G8A	0.00130156	0.00126566	8.97727	4.10358	38.8848	6.34489	29.9075	7.55625	24.4167		A-1T;G8A	35	5.71429	18	11.1111	35	14.2857	18	16.6667	30	10	37	21.6216	16	37.5	16	50	16	37.5	16	31.25	31	54.8387	25	20	14	21.4286
A-1T;G8C	3e-07	3.27906e-05	56.2321	12.2625	31.3464	4.8257	-24.8856	13.1778	5.08333		A-1T;G8C	7	57.1429	0	NA	13	15.3846	5	40	5	40	8	37.5	4	25	2	50	3	33.3333	7	14.2857	3	33.3333	4	25	1	0
A-1T;G8T	0.000461877	0.000536257	11.6424	5.87791	40.3089	6.4332	28.6664	8.71412	21		A-1T;G8T	29	17.2414	9	0	35	14.2857	23	39.1304	30	16.6667	40	40	13	30.7692	8	37.5	10	50	12	41.6667	26	26.9231	17	52.9412	13	7.69231
A-1T;A9C	0.000141678	0.00207668	22.9785	13.5771	18.8187	7.72695	-4.15978	15.6219	5.75		A-1T;A9C	9	11.1111	1	100	7	28.5714	4	25	7	0	8	25	9	11.1111	5	60	2	50	4	0	11	18.1818	2	0	6	0
A-1T;A9G	0.00230321	0.0012195	4.63537	2.4203	50.7968	6.02934	46.1614	6.49699	40.6667		A-1T;A9G	55	7.27273	21	9.52381	73	4.10959	30	3.33333	48	12.5	66	28.7879	44	25	20	25	30	60	24	37.5	39	53.8462	38	44.7368	29	24.1379
A-1T;A9T	0.00274065	0.00121056	6.07666	1.57174	41.9904	4.07495	35.9137	4.36756	63.25		A-1T;A9T	86	4.65116	35	8.57143	125	6.4	45	20	81	8.64198	104	18.2692	40	20	43	34.8837	38	39.4737	41	36.5854	58	32.7586	63	46.0317	28	10.7143
A-1T;A10C	0.00140345	0.000912461	3.95327	4.8481	73.1178	10.421	69.1645	11.4935	10.5833		A-1T;A10C	17	5.88235	9	22.2222	15	0	11	9.09091	15	40	21	23.8095	6	83.3333	4	50	10	60	6	83.3333	5	80	8	62.5	9	11.1111
A-1T;A10G	0.000685323	0.000215719	7.06833	2.22474	62.3082	3.52504	55.2398	4.16838	36.75		A-1T;A10G	61	8.19672	27	7.40741	61	9.83607	40	22.5	42	30.9524	52	42.3077	31	51.6129	18	66.6667	28	71.4286	17	52.9412	31	61.2903	33	51.5152	24	12.5
A-1T;A10T	0.000619031	0.000209377	11.0947	2.63042	69.3913	3.67261	58.2966	4.51742	80.5833		A-1T;A10T	136	10.2941	82	12.1951	119	21.0084	82	31.7073	101	40.5941	100	43	58	50	63	73.0159	43	67.4419	62	54.8387	72	73.6111	49	73.4694	68	14.7059
A-1T;G11A	0.00191682	0.00104467	16.4042	3.03176	62.7166	5.16369	46.3124	5.98793	28.6667		A-1T;G11A	58	20.6897	25	12	39	15.3846	28	21.4286	49	20.4082	27	51.8519	15	33.3333	14	57.1429	23	52.1739	13	61.5385	28	64.2857	25	60	16	0
A-1T;G11C	0.00151704	0.00269379	5.62697	6.59768	35.9696	11.8522	30.3426	13.5648	7.83333		A-1T;G11C	10	0	7	14.2857	13	15.3846	12	0	8	12.5	14	28.5714	4	0	4	50	4	75	3	66.6667	10	10	5	60	8	0
A-1T;G11T	0.00285404	0.00150268	14.6373	2.63034	55.8047	4.99396	41.1675	5.64431	42.1667		A-1T;G11T	63	17.4603	30	23.3333	57	12.2807	42	23.8095	58	13.7931	69	28.9855	33	39.3939	25	52	25	48	27	48.1481	37	51.3514	40	55	28	3.57143
A-1T;A12C	0.00343658	0.00352204	4.36494	4.56949	50.7192	13.9234	46.3543	14.6541	8.58333		A-1T;A12C	14	7.14286	3	0	12	0	11	0	17	23.5294	17	5.88235	5	20	2	100	3	33.3333	6	50	10	40	3	33.3333	9	0
A-1T;A12G	0.00315694	0.00210034	20.1553	4.7231	80.9266	8.40138	60.7713	9.63798	19.25		A-1T;A12G	30	16.6667	15	33.3333	32	15.625	23	21.7391	23	39.1304	30	36.6667	18	61.1111	11	36.3636	14	50	9	88.8889	15	86.6667	11	72.7273	10	30
A-1T;A12T	0.00257686	0.00070049	7.90594	1.39704	58.6355	3.81474	50.7295	4.06251	67.4167		A-1T;A12T	120	6.66667	57	12.2807	80	10	62	11.2903	74	20.2703	120	23.3333	78	30.7692	39	41.0256	53	60.3774	30	60	46	50	50	54	51	11.7647
A-1T;G13A	0.000952387	0.000283285	6.99875	1.25723	39.1573	2.2614	32.1585	2.58739	70		A-1T;G13A	91	4.3956	49	14.2857	102	10.7843	59	13.5593	101	19.802	114	22.807	71	28.169	29	37.931	51	35.2941	47	38.2979	63	38.0952	63	41.2698	37	5.40541
A-1T;G13C	0.000661512	0.000374534	6.05401	2.31789	31.5023	3.03313	25.4483	3.8174	14.75		A-1T;G13C	17	5.88235	9	0	14	7.14286	15	6.66667	22	18.1818	30	23.3333	13	23.0769	4	25	17	29.4118	9	44.4444	15	20	12	33.3333	4	25
A-1T;G13T	0.000953794	0.00105627	10.6939	3.47332	34.3825	5.10028	23.6886	6.17064	38.4167		A-1T;G13T	63	20.6349	28	3.57143	55	9.09091	34	17.6471	41	24.3902	51	25.4902	32	28.125	32	18.75	26	26.9231	30	33.3333	35	42.8571	34	38.2353	23	4.34783
A-1T;T14A	0.00351652	0.00136244	15.7058	2.91075	81.627	4.74438	65.9212	5.56611	27.3333		A-1T;T14A	33	24.2424	18	16.6667	48	14.5833	30	16.6667	32	15.625	38	39.4737	18	38.8889	19	63.1579	12	75	22	77.2727	34	70.5882	24	83.3333	21	4.7619
A-1T;T14C	0.00132482	0.00112606	9.26914	4.17584	52.0333	8.2738	42.7642	9.26787	35.9167		A-1T;T14C	68	7.35294	39	15.3846	58	10.3448	33	15.1515	35	22.8571	55	23.6364	32	53.125	10	40	20	25	28	71.4286	24	66.6667	29	31.0345	25	16
A-1T;T14G	0.00206143	0.00436841	7.63358	10.4418	54.1178	20.2827	46.4842	22.8127	3		A-1T;T14G	9	0	2	0	3	33.3333	3	0	5	20	4	0	0	NA	0	NA	3	100	0	NA	3	0	4	75	1	0
A-1T;A15C	0.0109208	0.0194358	18.1676	7.61774	67.1412	25.322	48.9736	26.443	5.16667		A-1T;A15C	12	33.3333	9	11.1111	3	0	4	25	8	12.5	2	0	4	0	3	66.6667	5	80	4	25	6	33.3333	2	100	2	0
A-1T;A15G	0.000525713	0.00044131	14.279	5.86743	58.295	6.86487	44.016	9.03068	23.4167		A-1T;A15G	39	23.0769	23	13.0435	38	10.5263	26	34.6154	33	48.4848	31	48.3871	17	29.4118	11	63.6364	15	53.3333	9	44.4444	19	68.4211	20	60	11	9.09091
A-1T;A15T	0.000670244	0.000360081	13.8655	4.82585	65.2157	4.90671	51.3501	6.8822	54.4167		A-1T;A15T	66	19.697	35	20	76	14.4737	58	20.6897	78	42.3077	80	48.75	45	57.7778	31	58.0645	53	77.3585	29	51.7241	66	54.5455	36	61.1111	32	6.25
A-1T;T16A	0.000824651	0.000455793	10.0062	4.4052	62.9812	5.39384	52.975	6.96414	43		A-1T;T16A	47	17.0213	36	8.33333	57	10.5263	47	23.4043	49	30.6122	63	38.0952	44	54.5455	25	80	33	48.4848	30	60	33	48.4848	52	65.3846	30	16.6667
A-1T;T16C	0.000683091	0.00037914	5.43509	3.83902	65.0556	6.731	59.6205	7.74883	25.3333		A-1T;T16C	48	4.16667	16	6.25	32	21.875	24	8.33333	31	38.7097	31	38.7097	19	68.4211	23	52.1739	24	79.1667	14	57.1429	23	65.2174	19	42.1053	16	12.5
A-1T;T16G	0.00431501	0.00771757	24.2102	7.88371	62.1443	15.1717	37.934	17.0978	2.41667		A-1T;T16G	4	25	1	0	5	20	5	20	1	0	1	0	3	33.3333	1	0	2	100	4	50	1	0	1	100	0	NA
A-1T;A17C	0.000771733	0.000460927	6.03056	5.82122	79.0098	7.92564	72.9792	9.83374	3.41667		A-1T;A17C	6	0	5	0	2	0	2	0	2	0	8	75	3	33.3333	0	NA	1	100	2	100	7	85.7143	3	66.6667	2	0
A-1T;A17G	0.000724348	0.000471216	8.49157	4.32374	59.5479	7.22163	51.0564	8.41704	25.6667		A-1T;A17G	38	5.26316	25	12	44	20.4545	29	13.7931	40	32.5	27	29.6296	24	66.6667	11	27.2727	17	70.5882	20	70	17	52.9412	16	43.75	19	0
A-1T;A17T	0.0032266	0.0012891	8.06063	2.28812	66.1862	5.45953	58.1256	5.91963	30.25		A-1T;A17T	56	7.14286	14	7.14286	42	11.9048	28	14.2857	38	7.89474	37	27.027	25	44	26	50	23	52.1739	21	52.381	27	55.5556	26	73.0769	25	12
A-1T;A18C	0.00116269	0.000681979	13.0152	5.63172	78.5532	7.14607	65.538	9.09849	17.4167		A-1T;A18C	32	12.5	15	26.6667	25	20	16	6.25	24	45.8333	29	44.8276	11	72.7273	2	100	9	77.7778	9	44.4444	16	81.25	21	80.9524	9	33.3333
A-1T;A18G	0.000993991	0.000371783	3.75732	2.72131	73.4197	5.36518	69.6624	6.01587	35.8333		A-1T;A18G	66	4.54545	18	0	53	16.9811	29	6.89655	42	23.8095	48	50	30	66.6667	26	61.5385	25	52	23	82.6087	42	69.0476	28	71.4286	21	4.7619
A-1T;A18T	0.000788674	0.000142534	8.35656	1.32711	67.0001	2.31795	58.6436	2.67098	101.833		A-1T;A18T	173	6.93642	92	14.1304	150	17.3333	101	20.7921	138	26.8116	151	47.6821	73	56.1644	59	61.0169	69	65.2174	52	65.3846	84	65.4762	80	63.75	78	10.2564
A-1T;G19A	0.00131555	0.000573917	10.9959	3.29098	70.6371	5.56385	59.6411	6.46428	35.6667		A-1T;G19A	67	8.95522	25	20	56	19.6429	29	10.3448	45	26.6667	49	36.7347	34	64.7059	20	50	22	77.2727	20	55	30	73.3333	31	64.5161	20	10
A-1T;G19C	0.0427523	0.0488186	8.8036	4.00576	100	41.7543	91.1964	41.946	3.33333		A-1T;G19C	6	0	1	0	7	0	2	0	4	0	3	0	3	0	0	NA	1	100	5	20	2	50	6	83.3333	1	0
A-1T;G19T	0.00604524	0.00263372	11.5938	2.26259	72.871	6.50888	61.2772	6.89093	41.25		A-1T;G19T	66	10.6061	41	7.31707	54	12.963	34	20.5882	48	18.75	67	17.9104	35	42.8571	21	38.0952	34	44.1176	21	57.1429	38	76.3158	36	63.8889	26	3.84615
A-1T;A20C	0.00676974	0.00608265	9.88827	4.23204	66.1909	12.333	56.3026	13.0389	9.25		A-1T;A20C	10	20	10	0	12	8.33333	11	27.2727	15	13.3333	6	0	3	66.6667	10	30	5	40	9	66.6667	3	66.6667	17	58.8235	10	0
A-1T;A20G	0.00183585	0.00102681	3.17727	2.26218	44.547	5.88532	41.3697	6.30511	22.6667		A-1T;A20G	27	7.40741	18	0	18	0	29	10.3448	35	8.57143	28	28.5714	22	22.7273	29	41.3793	19	26.3158	16	37.5	15	40	16	56.25	14	0
A-1T;A20T	0.00279935	0.00171332	11.5395	2.64334	54.5223	6.22598	42.9828	6.76388	67.5		A-1T;A20T	109	12.844	57	7.01754	118	13.5593	68	11.7647	98	23.4694	79	29.1139	57	26.3158	38	31.5789	37	51.3514	39	61.5385	57	36.8421	53	64.1509	44	15.9091
A-1T;G21A	0.0257639	0.0228602	10.7157	1.52834	48.039	12.7156	37.3233	12.8072	33.5		A-1T;G21A	54	7.40741	27	22.2222	57	12.2807	25	8	42	9.52381	55	10.9091	27	14.8148	19	15.7895	18	16.6667	25	28	27	44.4444	26	34.6154	17	17.6471
A-1T;G21C	4.68523e-06	0.000141941	16.7166	12.1827	13.0776	3.62011	-3.63895	12.7092	2.5		A-1T;G21C	2	0	2	0	0	NA	5	0	2	0	6	0	2	0	3	0	0	NA	2	0	0	NA	6	33.3333	2	0
A-1T;G21T	0.00323228	0.00222025	6.97785	2.08531	36.6099	5.6166	29.6321	5.99122	39.1667		A-1T;G21T	59	3.38983	28	25	38	7.89474	35	8.57143	53	11.3208	68	17.6471	44	15.9091	22	22.7273	26	34.6154	32	25	42	38.0952	23	39.1304	41	9.7561
A-1T;A22C	0.00177453	0.00212004	9.40121	4.88955	49.4962	10.6805	40.095	11.7465	7.5		A-1T;A22C	21	4.7619	3	0	8	37.5	10	10	11	9.09091	6	50	4	25	4	50	9	22.2222	3	33.3333	7	57.1429	4	75	2	0
A-1T;A22G	0.0112354	0.00672448	7.44427	2.11711	64.488	9.94642	57.0437	10.1692	43.25		A-1T;A22G	63	7.93651	41	2.43902	60	13.3333	32	9.375	49	14.2857	64	9.375	45	17.7778	22	31.8182	32	50	25	28	47	53.1915	39	64.1026	39	10.2564
A-1T;A22T	0.0655157	0.120807	10.8223	1.56913	42.6604	30.7937	31.838	30.8336	68		A-1T;A22T	122	11.4754	39	2.5641	103	15.534	60	8.33333	92	14.1304	97	10.3093	51	19.6078	40	17.5	49	12.2449	48	18.75	56	23.2143	59	30.5085	55	7.27273
A-1T;G23A	0.077342	0.119029	9.09945	2.5631	100	77.7143	90.9005	77.7566	40.6667		A-1T;G23A	65	7.69231	31	3.22581	54	3.7037	44	9.09091	65	21.5385	53	16.9811	37	21.6216	23	13.0435	32	40.625	17	11.7647	38	42.1053	29	65.5172	18	11.1111
A-1T;G23C	0.00220331	0.00305586	7.94726	3.27851	25.5429	5.93588	17.5956	6.7811	4.25		A-1T;G23C	6	0	2	0	4	0	3	0	7	0	5	20	7	14.2857	6	16.6667	4	25	3	0	3	33.3333	1	0	3	0
A-1T;G23T	0.00300755	0.00496365	12.4622	2.85362	26.2902	5.88639	13.828	6.54161	34.3333		A-1T;G23T	53	7.54717	31	12.9032	42	14.2857	31	19.3548	50	20	51	13.7255	41	14.6341	15	20	27	37.037	16	12.5	35	20	20	40	15	0
A-1T;A24C	0.00136386	0.00168151	13.5189	6.43904	54.3793	10.0612	40.8604	11.9453	4		A-1T;A24C	4	25	8	25	7	0	1	0	10	30	4	25	1	0	1	100	4	50	2	50	3	66.6667	3	33.3333	2	0
A-1T;A24G	0.000919254	0.000413754	7.88049	3.65011	71.7101	5.34005	63.8296	6.46834	36.8333		A-1T;A24G	58	15.5172	34	5.88235	53	7.54717	39	30.7692	45	24.4444	44	50	26	57.6923	21	76.1905	27	62.963	24	79.1667	43	67.4419	28	60.7143	23	4.34783
A-1T;A24T	0.000716082	0.000178919	9.67392	1.81382	67.1033	2.85927	57.4294	3.38605	111.833		A-1T;A24T	213	10.7981	89	14.6067	221	13.1222	104	24.0385	120	32.5	139	53.9568	86	47.6744	57	68.4211	67	62.6866	79	63.2911	97	63.9175	70	68.5714	87	13.7931
A-1T;T25A	0.000503238	0.000350983	8.21354	4.72922	56.3621	6.37661	48.1486	7.93894	34.5833		A-1T;T25A	58	15.5172	17	0	37	27.027	36	25	39	23.0769	57	49.1228	46	54.3478	26	46.1538	25	68	20	40	26	57.6923	28	50	38	10.5263
A-1T;T25C	0.00153112	0.000478948	5.26605	2.09435	77.49	4.85012	72.224	5.28299	44.1667		A-1T;T25C	88	5.68182	24	0	63	14.2857	42	21.4286	46	32.6087	64	32.8125	55	49.0909	30	60	21	66.6667	28	67.8571	38	71.0526	31	87.0968	30	3.33333
A-1T;T25G	0.000497052	0.000952882	23.0618	15.251	61.2233	11.0657	38.1616	18.8426	3.33333		A-1T;T25G	4	25	1	0	5	20	4	25	3	33.3333	10	50	4	50	3	100	1	100	1	100	2	50	2	0	3	0
A-1T;C26A	0.000938726	0.000530343	9.64702	5.62502	80.5266	6.97959	70.8796	8.96412	14.8333		A-1T;C26A	23	17.3913	17	5.88235	22	13.6364	15	13.3333	23	34.7826	16	50	12	83.3333	5	40	7	85.7143	13	53.8462	12	91.6667	13	76.9231	8	0
A-1T;C26G	0.000234714	0.000739998	12.9497	18.7912	45.4615	12.9631	32.5118	22.8287	1.75		A-1T;C26G	2	0	3	0	0	NA	2	50	2	0	3	33.3333	1	100	1	100	1	100	0	NA	3	0	3	66.6667	0	NA
A-1T;C26T	0.000379027	0.000301637	2.525	5.56731	59.2751	7.94538	56.7501	9.70176	25.3333		A-1T;C26T	38	10.5263	22	0	26	15.3846	25	28	40	42.5	40	45	22	27.2727	20	75	14	71.4286	9	66.6667	29	68.9655	19	31.5789	23	8.69565
A-1T;C27A	0.000856571	0.000690879	11.8961	3.6757	41.6155	5.04494	29.7195	6.24197	38.8333		A-1T;C27A	51	9.80392	38	10.5263	48	27.0833	42	11.9048	59	20.339	49	36.7347	33	39.3939	19	21.0526	29	37.931	31	35.4839	32	53.125	35	40	40	12.5
A-1T;C27G	0.000390689	0.000641697	13.4554	12.5021	46.1854	8.90441	32.73	15.349	1.5		A-1T;C27G	2	0	0	NA	0	NA	2	0	1	0	3	66.6667	2	50	1	0	0	NA	5	40	0	NA	2	50	3	0
A-1T;C27T	0.000520869	0.000258436	8.27608	4.28899	68.9838	5.47793	60.7077	6.95724	29.25		A-1T;C27T	44	9.09091	22	4.54545	47	21.2766	35	25.7143	37	37.8378	40	50	26	65.3846	13	69.2308	18	38.8889	21	76.1905	21	52.381	27	81.4815	21	4.7619
A-1T;T28A	0.000919149	0.000315502	7.41427	2.44378	70.0953	4.70597	62.681	5.30266	30.1667		A-1T;T28A	60	5	16	6.25	39	23.0769	30	20	37	32.4324	50	36	31	58.0645	23	56.5217	12	83.3333	16	62.5	27	62.963	21	76.1905	30	10
A-1T;T28C	0.000480834	0.000219955	3.52729	2.84039	62.12	5.19539	58.5927	5.92114	54.0833		A-1T;T28C	102	12.7451	62	1.6129	87	17.2414	49	22.449	60	38.3333	66	46.9697	56	51.7857	26	53.8462	27	66.6667	31	64.5161	37	54.0541	46	63.0435	31	16.129
A-1T;T28G	0.0132415	0.0307057	27.3524	11.8763	100	37.2245	72.6476	39.0732	5.25		A-1T;T28G	3	0	3	0	10	50	6	33.3333	10	30	7	28.5714	4	50	0	NA	3	66.6667	2	0	10	100	5	40	9	0
A-1T;A29C	0.0034913	0.00770585	17.2333	11.7119	76.1753	24.8829	58.9419	27.5014	1.58333		A-1T;A29C	1	100	1	0	5	0	2	0	3	33.3333	2	0	0	NA	0	NA	2	100	0	NA	1	100	2	50	1	0
A-1T;A29G	0.000654859	0.0002604	7.39114	2.73123	65.7686	4.87142	58.3774	5.58483	37.75		A-1T;A29G	85	9.41176	33	9.09091	61	8.19672	38	28.9474	43	32.5581	50	50	32	53.125	22	63.6364	21	76.1905	22	59.0909	23	69.5652	23	47.8261	23	13.0435
A-1T;A29T	0.000688715	0.000255801	7.54399	2.90755	70.2834	4.69569	62.7394	5.52298	63		A-1T;A29T	117	11.9658	53	3.77358	98	15.3061	61	22.9508	98	42.8571	78	35.8974	46	65.2174	25	72	36	75	40	65	62	67.7419	42	66.6667	39	15.3846
A-1T;T30A	0.000849674	0.000210685	7.76025	1.70435	69.0056	3.31181	61.2453	3.72464	107.833		A-1T;T30A	218	7.79817	96	7.29167	178	17.9775	98	21.4286	129	26.3566	148	42.5676	85	61.1765	51	72.549	63	63.4921	63	69.8413	91	61.5385	74	66.2162	88	6.81818
A-1T;T30C	0.000872617	0.000338014	6.64416	2.73499	71.4612	5.01499	64.8171	5.71229	41.25		A-1T;T30C	80	5	45	13.3333	58	13.7931	33	12.1212	52	32.6923	52	55.7692	23	34.7826	25	56	25	64	33	81.8182	39	66.6667	30	70	35	20
A-1T;T30G	0.000689625	0.00033882	6.21998	5.14911	84.0731	6.05994	77.8531	7.95213	9.91667		A-1T;T30G	15	6.66667	7	0	18	11.1111	13	23.0769	13	53.8462	13	38.4615	5	80	3	100	8	87.5	6	100	7	71.4286	11	63.6364	8	0
A-1T;T31A	0.000759121	0.000303801	7.4886	3.58741	72.3594	4.77778	64.8708	5.97467	49.3333		A-1T;T31A	65	12.3077	48	8.33333	69	8.69565	38	28.9474	62	30.6452	78	51.2821	50	62	14	50	45	82.2222	39	69.2308	45	60	39	66.6667	26	19.2308
A-1T;T31C	0.000892389	0.000436262	9.18577	4.24776	76.2669	6.76547	67.0811	7.98843	44		A-1T;T31C	82	9.7561	33	9.09091	80	18.75	45	13.3333	49	32.6531	65	43.0769	43	76.7442	15	86.6667	28	53.5714	27	74.0741	36	58.3333	25	84	33	21.2121
A-1T;T31G	0.00177815	0.00106365	10.7167	5.11987	81.4687	8.25708	70.7521	9.71558	15.1667		A-1T;T31G	24	20.8333	12	16.6667	23	4.34783	16	31.25	13	23.0769	27	37.037	15	53.3333	7	71.4286	11	90.9091	12	58.3333	13	84.6154	9	66.6667	13	7.69231
A-1T;T32A	0.00106948	0.000178001	7.09604	1.19061	71.7639	2.24777	64.6679	2.54362	78.0833		A-1T;T32A	160	6.875	59	10.1695	96	11.4583	85	20	105	27.619	96	41.6667	52	53.8462	51	68.6275	43	62.7907	54	61.1111	79	68.3544	57	77.193	48	6.25
A-1T;T32C	0.000581896	0.000156781	6.62558	1.95959	65.3499	3.30011	58.7243	3.83806	78.9167		A-1T;T32C	115	5.21739	62	12.9032	143	16.0839	79	25.3165	108	37.037	106	35.8491	73	64.3836	36	55.5556	41	63.4146	41	65.8537	66	66.6667	77	63.6364	70	11.4286
A-1T;T32G	0.000559198	0.000212795	2.54676	2.24375	68.6918	5.7277	66.1451	6.1515	15.4167		A-1T;T32G	26	0	10	10	27	14.8148	18	16.6667	24	29.1667	21	52.381	14	64.2857	8	62.5	8	62.5	8	37.5	8	62.5	13	84.6154	10	0
A-1T;T33A	0.000786675	0.00011691	8.90307	1.21091	72.8025	1.85622	63.8994	2.21627	88.8333		A-1T;T33A	146	8.21918	59	10.1695	154	17.5325	92	23.913	101	35.6436	130	47.6923	76	52.6316	49	67.3469	52	71.1538	64	67.1875	93	76.3441	50	68	71	8.4507
A-1T;T33C	0.000808937	0.000360591	10.9031	3.5879	69.3504	5.13939	58.4472	6.26788	49.5		A-1T;T33C	101	9.90099	23	8.69565	59	28.8136	55	16.3636	63	34.9206	69	44.9275	43	51.1628	16	87.5	33	72.7273	47	63.8298	46	67.3913	39	58.9744	35	11.4286
A-1T;T33G	0.00140937	0.00155247	20.0793	7.95028	70.984	10.3856	50.9047	13.0793	4.08333		A-1T;T33G	11	18.1818	4	25	3	0	6	16.6667	7	57.1429	6	33.3333	2	50	1	100	1	0	1	100	4	50	3	100	2	100
A-1T;A34C	1.99236e-05	4.40773e-05	6.04293	10.1979	45.2791	7.28175	39.2362	12.5308	5.83333		A-1T;A34C	7	0	2	0	6	66.6667	6	33.3333	7	28.5714	9	33.3333	5	20	9	33.3333	3	100	7	42.8571	4	50	5	40	4	0
A-1T;A34G	0.000551805	0.000182876	3.7549	2.29287	65.8629	4.16566	62.108	4.75499	30.3333		A-1T;A34G	58	5.17241	29	3.44828	43	9.30233	26	15.3846	38	34.2105	38	55.2632	22	59.0909	14	71.4286	19	73.6842	20	70	29	55.1724	28	53.5714	30	6.66667
A-1T;A34T	0.000718691	0.000221823	7.4796	2.26491	66.2677	3.6378	58.7881	4.28526	81.4167		A-1T;A34T	149	11.4094	58	3.44828	118	15.2542	89	23.5955	97	29.8969	117	47.0085	60	51.6667	47	63.8298	35	74.2857	62	66.129	74	56.7568	71	66.1972	62	8.06452
A-1T;A35C	0.00115022	0.00035889	11.044	2.52099	75.5854	4.22244	64.5414	4.91777	20.5		A-1T;A35C	45	11.1111	15	6.66667	24	16.6667	22	22.7273	25	24	30	50	19	47.3684	11	81.8182	15	73.3333	13	76.9231	13	69.2308	14	71.4286	14	0
A-1T;A35G	0.000757425	0.000339898	10.8788	3.84204	70.7154	5.25554	59.8366	6.51015	53.5833		A-1T;A35G	98	12.2449	33	12.1212	90	15.5556	56	19.6429	72	31.9444	69	60.8696	49	55.102	17	47.0588	46	63.0435	38	84.2105	37	54.0541	38	68.4211	41	12.1951
A-1T;A35T	0.00104177	0.000245837	11.9132	1.97393	74.8406	2.94726	62.9274	3.54722	94.0833		A-1T;A35T	165	13.3333	74	9.45946	140	19.2857	102	20.5882	141	36.8794	115	45.2174	82	54.878	46	63.0435	60	68.3333	48	83.3333	88	72.7273	68	67.6471	71	7.04225
A-1T;A36C	0.000961325	0.000901187	9.47622	8.81535	76.8196	11.2764	67.3433	14.3132	11.5		A-1T;A36C	18	11.1111	6	0	22	13.6364	7	14.2857	10	40	25	40	12	41.6667	7	100	4	25	6	50	11	45.4545	10	90	14	0
A-1T;A36G	0.00101589	0.000449852	8.42334	3.507	69.098	5.64361	60.6746	6.6445	25.3333		A-1T;A36G	43	9.30233	27	11.1111	32	9.375	18	11.1111	47	29.7872	29	37.931	20	75	9	33.3333	19	63.1579	15	66.6667	22	72.7273	23	65.2174	13	15.3846
A-1T;A36T	0.00126855	0.00094911	5.4165	7.60872	77.3637	11.4951	71.9472	13.7852	32.4167		A-1T;A36T	55	12.7273	27	11.1111	48	20.8333	37	2.7027	38	18.4211	49	71.4286	30	60	16	62.5	17	58.8235	15	60	28	60.7143	29	86.2069	28	17.8571
A-1T;G37A	0.00122027	0.000617771	12.4574	3.5817	68.4485	5.87789	55.9911	6.88318	32.3333		A-1T;G37A	64	15.625	26	19.2308	54	9.25926	25	20	36	41.6667	46	30.4348	27	66.6667	16	56.25	25	64	14	71.4286	24	66.6667	31	64.5161	32	15.625
A-1T;G37C	7.99942e-05	0.000123678	4.36327	7.40449	38.0672	8.64475	33.7039	11.3824	3.5		A-1T;G37C	9	0	3	0	4	0	1	100	4	50	6	50	3	33.3333	3	66.6667	2	0	2	50	3	0	2	50	4	0
A-1T;G37T	0.00092195	0.000383309	7.88084	2.67395	58.7694	4.49158	50.8885	5.22726	50.8333		A-1T;G37T	94	9.57447	30	13.3333	64	6.25	46	21.7391	55	29.0909	89	39.3258	51	43.1373	31	45.1613	35	62.8571	28	46.4286	42	69.0476	45	51.1111	53	5.66038
A-1T;G38A	0.00202965	0.000987504	7.55226	3.29709	69.379	6.90101	61.8267	7.64819	24.0833		A-1T;G38A	55	9.09091	13	7.69231	28	10.7143	12	0	38	26.3158	37	27.027	20	55	12	66.6667	23	56.5217	14	42.8571	20	70	17	76.4706	17	17.6471
A-1T;G38C	0.000238262	0.000806689	15.8667	7.87652	25.6597	4.86316	9.79302	9.25688	1.25		A-1T;G38C	2	0	0	NA	2	0	1	0	2	0	1	0	2	50	1	0	0	NA	1	0	2	0	1	0	2	50
A-1T;G38T	0.00180237	0.00119785	7.40437	2.8109	43.7315	6.06572	36.3272	6.68537	24.0833		A-1T;G38T	35	5.71429	20	5	36	8.33333	23	8.69565	23	34.7826	53	16.9811	10	20	13	53.8462	13	46.1538	20	30	17	41.1765	26	46.1538	12	8.33333
A-1T;A39C	0.00218947	0.00195208	4.65999	6.93193	61.6631	10.7322	57.0031	12.7762	5.91667		A-1T;A39C	5	0	3	0	8	12.5	6	0	8	0	8	25	6	66.6667	3	66.6667	5	60	5	60	9	33.3333	5	80	3	0
A-1T;A39G	0.000667433	0.000259341	10.9636	2.76478	62.4558	4.0079	51.4921	4.86901	38.3333		A-1T;A39G	73	9.58904	26	11.5385	54	20.3704	26	19.2308	58	36.2069	55	40	32	56.25	23	65.2174	28	46.4286	15	46.6667	43	72.093	27	59.2593	21	14.2857
A-1T;A39T	0.00128073	0.000651773	7.06626	3.06984	64.144	6.87081	57.0778	7.52542	37.6667		A-1T;A39T	74	5.40541	27	7.40741	54	20.3704	44	9.09091	32	31.25	56	32.1429	45	37.7778	23	78.2609	22	59.0909	12	58.3333	34	52.9412	29	65.5172	21	23.8095
A-1T;C40A	0.000703499	0.000338493	5.83667	3.24799	59.1494	5.48429	53.3127	6.37392	21.5833		A-1T;C40A	31	9.67742	22	4.54545	31	6.45161	24	20.8333	19	26.3158	46	41.3043	24	50	9	66.6667	11	72.7273	9	44.4444	23	43.4783	10	70	12	0
A-1T;C40G	0.00240768	0.00190954	4.85944	5.58904	75.897	11.3385	71.0376	12.6412	9.66667		A-1T;C40G	14	7.14286	7	0	11	0	11	9.09091	16	12.5	11	36.3636	12	41.6667	6	33.3333	6	66.6667	6	100	7	28.5714	9	66.6667	8	12.5
A-1T;C40T	0.00734394	0.00386041	9.50512	2.02508	58.6305	7.93999	49.1254	8.19416	77.4167		A-1T;C40T	128	7.8125	53	11.3208	120	10	69	11.5942	101	13.8614	131	25.1908	79	12.6582	60	41.6667	34	38.2353	43	51.1628	50	54	61	52.459	55	5.45455
A-1T;G41A	0.00362095	0.00107354	8.31165	1.47533	67.0205	4.50632	58.7088	4.74168	97.9167		A-1T;G41A	205	9.7561	64	14.0625	154	7.14286	100	9	138	20.2899	122	22.9508	99	35.3535	52	36.5385	51	58.8235	46	65.2174	75	56	69	68.1159	62	14.5161
A-1T;G41C	0.0026786	0.00387558	6.36078	4.55779	32.6767	10.4076	26.3159	11.3618	12.75		A-1T;G41C	16	6.25	12	0	18	5.55556	6	50	11	0	33	24.2424	17	11.7647	5	20	3	33.3333	6	50	14	14.2857	12	50	6	16.6667
A-1T;G41T	0.0142024	0.0138234	7.36286	2.25399	52.2094	14.3257	44.8466	14.5019	44.4167		A-1T;G41T	88	9.09091	27	0	58	8.62069	42	11.9048	62	11.2903	65	13.8462	37	18.9189	29	34.4828	28	14.2857	19	21.0526	37	54.0541	41	46.3415	37	13.5135
A-1T;C42A	0.000589108	0.000420936	5.69595	3.21364	40.1741	4.9066	34.4782	5.86534	17.0833		A-1T;C42A	20	10	14	0	30	10	17	17.6471	15	20	33	30.303	19	26.3158	9	44.4444	13	23.0769	9	55.5556	10	50	16	37.5	12	8.33333
A-1T;C42G	0.00574844	0.0119232	8.73281	6.19111	34.0801	13.2525	25.3473	14.6274	3.91667		A-1T;C42G	7	0	0	NA	3	33.3333	3	0	3	0	5	0	4	0	5	40	2	0	5	60	7	14.2857	3	33.3333	0	NA
A-1T;C42T	0.00687282	0.00368043	10.8239	2.2005	63.8042	7.51358	52.9804	7.82918	45.5		A-1T;C42T	86	10.4651	34	8.82353	66	10.6061	33	6.06061	64	25	70	20	42	23.8095	23	21.7391	18	44.4444	32	65.625	38	57.8947	40	55	29	17.2414
A-1T;C43A	3.51992e-05	3.77305e-05	5.02175	2.12719	17.7652	1.6708	12.7434	2.7049	68.3333		A-1T;C43A	99	5.05051	46	10.8696	94	12.766	57	22.807	80	15	93	21.5054	68	19.1176	37	18.9189	51	9.80392	49	16.3265	74	24.3243	72	16.6667	50	14
A-1T;C43G	3e-07	2.73083e-05	4.78023	7.25077	27.4249	5.99064	22.6447	9.4054	6.58333		A-1T;C43G	10	0	7	42.8571	10	20	3	0	7	14.2857	13	23.0769	3	66.6667	3	0	7	42.8571	3	0	8	62.5	5	20	8	12.5
A-1T;C43T	0.0022	0.00134064	9.32714	1.67568	30.3755	3.20216	21.0484	3.6141	67.5		A-1T;C43T	95	7.36842	42	9.52381	76	14.4737	76	9.21053	84	13.0952	109	16.5138	84	21.4286	41	31.7073	38	15.7895	40	27.5	65	30.7692	60	33.3333	55	5.45455
A-1T;G44A	0.0102581	0.00603661	10.8108	1.82556	58.4556	7.72811	47.6448	7.9408	64.4167		A-1T;G44A	93	10.7527	47	12.766	103	7.76699	54	9.25926	90	17.7778	110	15.4545	49	28.5714	29	37.931	42	28.5714	42	35.7143	58	46.5517	56	62.5	49	8.16327
A-1T;G44C	0.000730363	0.00109274	3.58314	4.69641	28.7842	9.5099	25.201	10.6063	6.08333		A-1T;G44C	10	0	4	0	12	0	6	0	12	33.3333	15	13.3333	3	0	1	0	1	100	3	0	5	40	1	0	3	0
A-1T;G44T	6.05757e-05	7.54582e-05	4.68189	2.87457	16.8863	2.17274	12.2044	3.60332	53.4167		A-1T;G44T	79	5.06329	51	3.92157	60	21.6667	40	12.5	55	16.3636	92	22.8261	58	15.5172	33	15.1515	30	6.66667	33	15.1515	60	15	50	18	45	6.66667
A-1T;A45C	0.00298125	0.00373377	16.709	4.85453	49.4657	9.34927	32.7567	10.5345	6.33333		A-1T;A45C	13	23.0769	1	0	11	9.09091	7	14.2857	4	0	7	42.8571	10	40	2	0	4	50	7	42.8571	8	50	2	50	7	14.2857
A-1T;A45G	0.0145914	0.0132699	5.82513	1.96797	50.4378	14.2441	44.6127	14.3794	44.3333		A-1T;A45G	80	2.5	25	12	82	10.9756	45	4.44444	56	8.92857	56	17.8571	41	7.31707	20	10	28	46.4286	32	28.125	35	34.2857	32	50	32	9.375
A-1T;A45T	0.00179953	0.00082084	6.97288	2.46298	53.891	5.57423	46.9181	6.09412	66.5833		A-1T;A45T	92	5.43478	57	10.5263	91	17.5824	63	9.52381	81	12.3457	109	26.6055	72	38.8889	44	52.2727	54	55.5556	30	50	51	37.2549	55	56.3636	50	8
A-1T;A46C	0.00207344	0.001718	9.59006	4.38863	53.9528	9.103	44.3627	10.1057	14.8333		A-1T;A46C	20	15	9	11.1111	25	8	23	8.69565	18	11.1111	24	33.3333	19	36.8421	8	37.5	9	66.6667	6	16.6667	7	71.4286	10	50	13	7.69231
A-1T;A46G	0.000191649	0.000270955	10.455	3.18368	22.1882	2.50928	11.7332	4.05367	42.4167		A-1T;A46G	71	14.0845	35	5.71429	67	11.9403	24	20.8333	59	22.0339	60	21.6667	39	28.2051	20	20	25	28	32	21.875	32	15.625	45	15.5556	26	0
A-1T;A46T	0.00254427	0.000615434	11.8766	1.30238	59.1235	2.76412	47.2469	3.05557	65.75		A-1T;A46T	110	13.6364	49	16.3265	83	10.8434	75	16	97	17.5258	103	27.1845	48	41.6667	40	47.5	46	54.3478	31	48.3871	49	55.102	58	58.6207	63	3.1746
A-1T;G47A	3e-07	7.23847e-05	4.54693	5.21214	9.62159	2.79849	5.07466	5.91591	39.6667		A-1T;G47A	54	3.7037	20	10	45	6.66667	47	17.0213	53	11.3208	53	15.0943	36	19.4444	23	30.4348	34	11.7647	30	0	48	22.9167	33	12.1212	24	8.33333
A-1T;G47C	0.0779089	0.114094	4.22253	2.30059	100	79.2775	95.7775	79.3109	8.5		A-1T;G47C	12	0	11	0	9	0	6	33.3333	9	22.2222	15	0	11	0	4	0	5	20	10	30	4	25	6	66.6667	3	0
A-1T;G47T	0.000444058	0.00148059	10.1295	2.89599	14.6809	2.36792	4.55139	3.74083	55.4167		A-1T;G47T	71	11.2676	44	9.09091	74	8.10811	44	15.9091	56	8.92857	86	16.2791	56	17.8571	38	7.89474	55	20	51	7.84314	32	15.625	58	18.9655	28	7.14286
A-1T;G48A	0.000333313	0.000614122	7.35546	2.49883	15.3277	2.30746	7.97224	3.40126	66.3333		A-1T;G48A	111	11.7117	44	2.27273	91	8.79121	49	12.2449	68	13.2353	108	12.037	67	20.8955	29	10.3448	37	18.9189	61	9.83607	78	17.9487	53	13.2075	42	14.2857
A-1T;G48C	0.0467065	0.113915	6.16456	2.73484	42.8302	45.2002	36.6656	45.2828	11.5		A-1T;G48C	19	0	6	16.6667	12	33.3333	11	0	13	7.69231	17	11.7647	10	0	7	28.5714	14	14.2857	10	10	10	20	9	33.3333	2	50
A-1T;G48T	0.914264	19.3133	11.4989	1.56102	100	1718.86	88.5011	1718.86	76.25		A-1T;G48T	116	9.48276	36	11.1111	99	8.08081	73	12.3288	103	18.4466	113	12.3894	76	11.8421	29	20.6897	70	15.7143	64	6.25	75	17.3333	61	22.9508	45	4.44444
A-1T;G49A	0.000511079	0.000631833	11.3068	2.45263	22.9512	2.83662	11.6444	3.74991	52.9167		A-1T;G49A	92	8.69565	39	15.3846	59	20.339	44	11.3636	70	14.2857	88	22.7273	48	14.5833	24	33.3333	42	23.8095	33	18.1818	55	23.6364	41	21.9512	22	4.54545
A-1T;G49C	3e-07	2.69656e-05	19.2165	8.13246	10.9951	2.27368	-8.22142	8.44432	10.3333		A-1T;G49C	12	16.6667	6	0	14	7.14286	7	28.5714	16	6.25	14	7.14286	13	23.0769	10	0	3	0	10	10	13	7.69231	6	16.6667	6	0
A-1T;G49T	0.000113688	8.50498e-05	3.58502	4.1777	54.9056	6.01658	51.3205	7.32478	24.3333		A-1T;G49T	42	2.38095	12	8.33333	39	33.3333	19	36.8421	26	30.7692	43	41.8605	20	75	15	66.6667	11	81.8182	19	42.1053	26	57.6923	20	35	23	17.3913
A-1T;A50C	2.44106e-05	6.7567e-05	7.84216	5.29869	22.8127	4.02534	14.9705	6.65428	16.75		A-1T;A50C	31	6.45161	9	11.1111	25	24	8	25	29	10.3448	17	23.5294	23	13.0435	6	16.6667	11	36.3636	12	41.6667	14	42.8571	16	25	9	0
A-1T;A50G	0.0040333	0.00357471	11.2485	1.63129	27.4776	3.68121	16.2292	4.02647	74.0833		A-1T;A50G	123	8.94309	41	12.1951	100	14	70	12.8571	113	12.3894	116	16.3793	70	11.4286	35	34.2857	47	25.5319	49	26.5306	57	26.3158	68	23.5294	45	6.66667
A-1T;A50T	0.000218069	0.000215003	6.5048	2.11714	18.1485	1.99267	11.6437	2.90741	105.333		A-1T;A50T	164	6.70732	59	8.47458	139	7.19424	96	12.5	163	21.4724	161	13.6646	108	15.7407	63	17.4603	78	15.3846	48	12.5	105	17.1429	80	27.5	39	2.5641
A-1T;C51A	0.00126243	0.00196959	3.24676	3.73369	28.0139	8.42825	24.7672	9.21824	11.75		A-1T;C51A	26	3.84615	7	0	19	0	7	0	11	18.1818	10	10	17	11.7647	7	71.4286	6	33.3333	11	9.09091	12	33.3333	8	25	5	20
A-1T;C51G	0.0107278	0.0143956	4.04613	1.91706	29.8128	12.1385	25.7667	12.289	11.3333		A-1T;C51G	24	0	8	25	12	0	14	14.2857	14	7.14286	18	5.55556	10	0	7	14.2857	5	20	6	16.6667	14	21.4286	4	25	8	12.5
A-1T;C51T	0.0017925	0.00224791	7.66818	2.02292	19.2264	3.24628	11.5582	3.82499	66.6667		A-1T;C51T	101	15.8416	52	3.84615	74	5.40541	50	10	99	8.08081	92	13.0435	68	19.1176	43	11.6279	47	19.1489	48	22.9167	61	16.3934	65	16.9231	44	13.6364
A-1T;A52C	1.49512e-05	0.00030273	10.4109	9.12329	12.7486	3.66314	2.33771	9.83122	9.5		A-1T;A52C	13	7.69231	6	0	11	18.1818	5	40	7	14.2857	15	6.66667	16	6.25	4	25	11	27.2727	6	16.6667	9	33.3333	11	0	8	0
A-1T;A52G	0.475162	2.98699	12.1264	1.33693	100	472.182	87.8736	472.184	75.25		A-1T;A52G	120	8.33333	38	7.89474	89	16.8539	69	15.942	112	15.1786	99	11.1111	67	13.4328	49	18.3673	55	9.09091	54	12.963	83	21.6867	68	27.9412	30	16.6667
A-1T;A52T	7.15846e-05	0.000156084	7.93362	2.80504	14.0461	1.87421	6.11247	3.37356	110.75		A-1T;A52T	190	8.42105	57	5.26316	157	11.465	127	12.5984	139	17.2662	168	16.6667	95	12.6316	62	14.5161	66	16.6667	95	15.7895	79	5.06329	94	19.1489	74	4.05405
A-1T;A53C	0.0371869	0.343421	14.7774	4.5557	2.16765	49.5831	-12.6098	49.7919	11.3333		A-1T;A53C	21	9.52381	9	33.3333	10	0	16	37.5	13	15.3846	14	7.14286	14	21.4286	3	33.3333	6	16.6667	9	11.1111	14	0	7	28.5714	13	15.3846
A-1T;A53G	0.00437239	0.0110242	10.4782	3.20097	22.1218	6.63869	11.6436	7.3701	55.4167		A-1T;A53G	91	13.1868	35	8.57143	72	16.6667	51	19.6078	78	3.84615	88	20.4545	40	15	33	21.2121	44	25	33	15.1515	49	20.4082	51	19.6078	31	3.22581
A-1T;A53T	0.000360424	0.000442631	5.69974	3.16824	20.3009	3.22986	14.6012	4.52435	72		A-1T;A53T	95	7.36842	47	8.51064	122	4.91803	69	15.942	96	13.5417	94	29.7872	84	14.2857	50	20	40	15	54	12.963	48	20.8333	65	26.1538	52	5.76923
A-1T;T54A	0.00115126	0.00056358	9.26372	2.83989	57.5104	5.22247	48.2467	5.94468	54.9167		A-1T;T54A	104	13.4615	49	4.08163	67	13.4328	46	26.087	66	21.2121	81	32.0988	50	50	29	37.931	35	65.7143	34	64.7059	47	51.0638	51	50.9804	33	12.1212
A-1T;T54C	0.00335843	0.00132346	7.70728	3.00127	85.0563	6.48634	77.349	7.14704	31.5833		A-1T;T54C	42	7.14286	23	4.34783	54	14.8148	21	9.52381	49	10.2041	39	48.7179	31	35.4839	20	60	29	65.5172	22	81.8182	26	80.7692	23	82.6087	32	15.625
A-1T;T54G	0.00121504	0.00429198	37.4884	13.7901	58.433	13.0791	20.9446	19.0061	5.16667		A-1T;T54G	9	44.4444	5	20	4	50	1	100	12	25	7	57.1429	3	33.3333	3	100	3	66.6667	5	20	5	80	5	40	3	33.3333
A-1T;C55A	0.00180926	0.00105753	11.0252	2.17061	40.8757	4.57521	29.8505	5.064	70.5833		A-1T;C55A	130	8.46154	42	11.9048	94	12.766	57	21.0526	108	21.2963	107	22.4299	79	20.2532	47	38.2979	43	44.186	33	45.4545	53	45.283	54	31.4815	43	4.65116
A-1T;C55G	0.000569673	0.00042636	0.153611	5.64398	58.5213	8.12585	58.3677	9.89363	10		A-1T;C55G	13	7.69231	9	0	16	0	11	18.1818	11	36.3636	13	53.8462	12	50	4	75	8	25	5	80	5	60	13	53.8462	4	0
A-1T;C55T	0.000455113	0.000226186	2.04946	2.90583	67.054	5.93062	65.0045	6.60425	31.5833		A-1T;C55T	55	3.63636	27	0	50	26	21	38.0952	36	36.1111	43	37.2093	44	59.0909	11	72.7273	15	73.3333	14	71.4286	36	72.2222	27	55.5556	16	6.25
A-1T;T56A	0.000757767	0.00027086	8.36051	2.43631	60.626	3.87913	52.2655	4.58075	67.5		A-1T;T56A	98	9.18367	52	5.76923	107	14.0187	59	28.8136	85	31.7647	104	32.6923	77	53.2468	24	66.6667	44	63.6364	44	59.0909	50	50	66	62.1212	58	13.7931
A-1T;T56C	0.00238399	0.000959807	9.96589	3.10901	79.2508	6.27367	69.2849	7.00177	35.9167		A-1T;T56C	71	11.2676	26	7.69231	53	13.2075	37	18.9189	41	12.1951	49	32.6531	41	56.0976	16	62.5	25	80	15	46.6667	30	80	27	74.0741	24	4.16667
A-1T;T56G	0.00763148	0.00607125	10.8526	7.0313	95.7595	16.401	84.9069	17.8447	7.41667		A-1T;T56G	8	12.5	8	0	11	18.1818	9	22.2222	8	12.5	12	25	5	0	4	50	5	100	5	40	9	77.7778	5	100	10	10
A-1T;A57C	3e-07	5.87075e-05	4.55257	9.66466	17.2494	6.71486	12.6969	11.7684	5.58333		A-1T;A57C	10	0	6	16.6667	7	42.8571	5	20	10	0	11	27.2727	5	0	1	100	3	0	3	0	3	66.6667	3	66.6667	1	0
A-1T;A57G	0.000697474	0.000415229	11.3866	3.79625	56.3332	5.74988	44.9466	6.89004	38.25		A-1T;A57G	59	10.1695	40	10	55	20	33	33.3333	53	20.7547	59	42.3729	36	58.3333	22	40.9091	19	73.6842	25	44	36	52.7778	22	54.5455	27	18.5185
A-1T;A57T	0.000498482	0.000140713	5.86122	1.83474	63.2629	3.35792	57.4016	3.82647	72.8333		A-1T;A57T	138	5.7971	63	7.93651	121	14.0496	67	37.3134	100	35	89	38.2022	54	55.5556	45	60	44	63.6364	33	66.6667	67	58.209	53	67.9245	53	22.6415
A-1T;T58A	0.000681506	0.000267806	8.51761	1.87325	44.9849	2.87086	36.4672	3.42796	86.5		A-1T;T58A	156	9.61538	76	6.57895	108	13.8889	66	13.6364	115	29.5652	106	32.0755	68	33.8235	41	29.2683	66	48.4848	63	38.0952	89	49.4382	84	46.4286	60	5
A-1T;T58C	0.000645646	0.000259991	12.565	3.0622	66.7063	4.37521	54.1413	5.34037	45.75		A-1T;T58C	89	11.236	40	22.5	61	22.9508	45	17.7778	50	36	67	53.7313	47	59.5745	26	53.8462	24	75	31	51.6129	33	69.697	36	63.8889	30	13.3333
A-1T;T58G	0.000429567	0.0014796	20.9295	12.6591	38.0965	9.05973	17.167	15.567	9.58333		A-1T;T58G	13	23.0769	3	0	16	25	13	23.0769	16	25	9	44.4444	5	20	11	45.4545	6	83.3333	6	33.3333	5	0	12	50	7	28.5714
A-1T;G59A	0.00269377	0.00207875	12.5881	2.58347	40.1813	5.49807	27.5932	6.07479	44.3333		A-1T;G59A	74	9.45946	37	13.5135	54	16.6667	39	12.8205	59	25.4237	70	14.2857	43	34.8837	32	37.5	29	24.1379	19	36.8421	37	40.5405	39	41.0256	30	6.66667
A-1T;G59C	0.0147675	0.0174304	5.57053	2.23552	33.6474	11.2116	28.0769	11.4323	14		A-1T;G59C	24	4.16667	11	0	24	4.16667	5	0	14	21.4286	16	6.25	13	0	10	10	13	30.7692	9	33.3333	13	23.0769	16	25	6	0
A-1T;G59T	0.068713	0.161058	11.8308	5.83083	100	112.244	88.1692	112.395	13.1667		A-1T;G59T	28	3.57143	8	12.5	18	16.6667	12	8.33333	15	46.6667	20	25	11	36.3636	4	50	9	0	4	50	16	75	13	53.8462	5	20
A-1T;T60A	0.00114139	0.00049686	13.0026	1.84475	44.6518	3.20994	31.6492	3.70227	70.9167		A-1T;T60A	117	10.2564	63	17.4603	97	15.4639	81	23.4568	82	26.8293	112	27.6786	68	27.9412	34	44.1176	41	39.0244	35	45.7143	61	49.1803	60	43.3333	59	10.1695
A-1T;T60C	0.00131543	0.00171729	9.51707	3.06219	25.404	4.58547	15.8869	5.51394	49.8333		A-1T;T60C	81	8.64198	29	24.1379	69	8.69565	43	9.30233	66	10.6061	74	22.973	40	12.5	45	31.1111	25	40	32	25	46	26.087	48	16.6667	53	16.9811
A-1T;T60G	0.00159044	0.00142914	6.42309	4.40811	46.3573	8.50077	39.9343	9.57572	15.6667		A-1T;T60G	13	0	11	0	14	28.5714	17	11.7647	34	20.5882	28	21.4286	11	27.2727	5	20	11	18.1818	15	40	17	70.5882	12	41.6667	13	0
A-1T;T61A	0.00418586	0.00333537	16.5331	2.72707	47.2958	5.88506	30.7627	6.4862	89.1667		A-1T;T61A	133	12.782	61	22.9508	113	15.0442	85	20	119	24.3697	127	30.7087	85	23.5294	54	24.0741	62	37.0968	57	56.1404	75	50.6667	99	40.404	67	8.95522
A-1T;T61C	0.00106742	0.000257824	11.916	2.09999	75.0617	2.9843	63.1457	3.64911	53.6667		A-1T;T61C	90	10	32	12.5	83	24.0964	47	14.8936	77	35.0649	66	46.9697	61	57.377	29	65.5172	31	64.5161	33	69.697	54	77.7778	41	75.6098	43	16.2791
A-1T;T61G	0.00154086	0.00236135	0.636963	16.2246	65.5335	22.2922	64.8966	27.5714	15		A-1T;T61G	28	7.14286	5	0	23	26.087	8	0	18	0	22	31.8182	15	33.3333	12	100	10	30	6	16.6667	16	12.5	17	64.7059	6	0
A-1T;T62A	0.000337073	0.000126722	7.51769	3.06868	67.6801	3.91959	60.1624	4.97795	45		A-1T;T62A	81	7.40741	37	8.10811	79	21.519	51	35.2941	47	44.6809	42	57.1429	35	40	21	52.381	29	79.3103	40	70	43	69.7674	35	68.5714	38	5.26316
A-1T;T62C	0.00067913	0.000291831	15.3092	3.88942	72.3268	4.55972	57.0176	5.99321	40.6667		A-1T;T62C	70	12.8571	22	13.6364	54	31.4815	26	30.7692	56	35.7143	76	47.3684	38	68.4211	15	73.3333	39	82.0513	22	63.6364	31	67.7419	39	61.5385	29	17.2414
A-1T;T62G	0.00100651	0.000938263	16.2687	11.1501	86.9673	9.40902	70.6986	14.5895	8.41667		A-1T;T62G	13	46.1538	6	33.3333	13	7.69231	5	0	9	55.5556	10	60	9	88.8889	6	66.6667	5	80	6	83.3333	7	100	12	66.6667	4	0
A-1T;A63C	0.000216798	0.000248298	13.4292	14.7566	79.7331	14.1771	66.3039	20.4633	3.41667		A-1T;A63C	11	18.1818	2	0	3	0	2	0	5	100	9	44.4444	1	100	1	100	1	100	0	NA	1	100	5	80	4	0
A-1T;A63G	0.000491764	0.000275147	4.62866	2.14506	38.3183	4.3425	33.6896	4.8434	34.0833		A-1T;A63G	58	3.44828	29	3.44828	42	11.9048	39	25.641	46	17.3913	58	22.4138	28	42.8571	25	32	18	50	24	33.3333	24	33.3333	18	44.4444	31	6.45161
A-1T;A63T	0.00147355	0.000876694	9.57648	3.60568	61.8488	7.10658	52.2724	7.96897	52.5		A-1T;A63T	93	13.9785	42	4.7619	87	20.6897	60	6.66667	75	36	64	32.8125	47	48.9362	28	42.8571	24	45.8333	20	60	45	64.4444	45	62.2222	42	19.0476
A-1T;T64A	0.000500612	0.000163229	7.64586	2.35636	61.7194	3.54263	54.0735	4.25472	58.3333		A-1T;T64A	108	7.40741	37	10.8108	95	14.7368	58	25.8621	75	28	74	52.7027	42	61.9048	34	58.8235	34	70.5882	43	62.7907	46	52.1739	54	53.7037	45	4.44444
A-1T;T64C	0.000431544	0.000179253	7.61429	3.58813	75.0216	4.67847	67.4073	5.896	52.3333		A-1T;T64C	105	10.4762	46	4.34783	68	27.9412	51	29.4118	60	43.3333	67	61.194	44	61.3636	30	70	30	83.3333	32	78.125	59	57.6271	36	83.3333	37	5.40541
A-1T;T64G	3.47026e-05	6.32117e-05	4.12197	5.14841	32.85	6.43733	28.7281	8.2429	4.5		A-1T;T64G	11	0	2	0	6	16.6667	6	33.3333	7	28.5714	7	42.8571	1	0	3	33.3333	0	NA	3	66.6667	4	50	4	0	2	50
A-1T;C65A	0.00123391	0.000851559	6.4374	2.62094	38.2546	5.87471	31.8172	6.43285	26.1667		A-1T;C65A	54	7.40741	14	7.14286	42	4.7619	25	20	33	9.09091	39	20.5128	33	39.3939	19	42.1053	10	40	10	40	22	31.8182	13	23.0769	8	0
A-1T;C65G	0.00279749	0.00282729	7.36274	4.55181	51.5957	11.5183	44.233	12.3851	5.83333		A-1T;C65G	12	0	4	0	3	33.3333	8	25	6	16.6667	11	9.09091	6	50	1	0	3	33.3333	4	25	7	71.4286	5	40	3	0
A-1T;C65T	0.00147558	0.00165293	11.0093	3.32468	33.743	6.07636	22.7337	6.92644	27.5833		A-1T;C65T	48	6.25	24	16.6667	32	15.625	31	19.3548	35	17.1429	38	21.0526	28	14.2857	10	40	22	50	13	38.4615	30	23.3333	20	35	18	11.1111
A-1T;C66A	0.000674332	0.000410328	11.4659	2.12335	33.8511	2.90652	22.3852	3.59951	61.25		A-1T;C66A	108	12.963	49	8.16327	72	16.6667	60	11.6667	91	25.2747	89	23.5955	60	33.3333	30	36.6667	36	25	37	37.8378	55	29.0909	48	35.4167	41	7.31707
A-1T;C66G	1.01187e-05	3.80329e-05	8.58967	4.9326	24.3337	4.0597	15.744	6.3884	11.75		A-1T;C66G	28	7.14286	8	12.5	16	25	13	38.4615	20	20	18	11.1111	14	21.4286	3	0	8	50	5	40	7	28.5714	1	0	9	22.2222
A-1T;C66T	0.00035316	0.000193777	6.2949	2.06449	32.5702	3.04995	26.2753	3.68297	36.75		A-1T;C66T	56	5.35714	26	3.84615	63	15.873	35	20	58	15.5172	49	30.6122	37	27.027	25	36	27	29.6296	18	33.3333	24	37.5	23	26.087	29	3.44828
A-1T;C67A	0.00786193	0.00535594	6.33012	2.18416	50.4586	8.83702	44.1285	9.10293	30.75		A-1T;C67A	39	10.2564	32	9.375	38	10.5263	24	0	46	15.2174	42	9.52381	29	20.6897	29	20.6897	14	35.7143	26	46.1538	17	47.0588	33	42.4242	26	7.69231
A-1T;C67G	0.000273097	0.000617027	8.39358	7.18983	27.2255	7.59118	18.8319	10.4556	9.5		A-1T;C67G	18	5.55556	3	0	9	11.1111	16	12.5	8	25	23	34.7826	7	0	9	22.2222	4	50	3	66.6667	11	45.4545	3	0	0	NA
A-1T;C67T	0.000712092	0.000462806	4.40007	3.14324	51.9225	6.28213	47.5224	7.02461	37.75		A-1T;C67T	64	9.375	29	0	52	25	38	18.4211	41	26.8293	47	29.7872	39	33.3333	23	52.1739	26	53.8462	22	63.6364	37	54.0541	35	42.8571	18	5.55556
A-1T;A68C	0.000505183	0.000600171	21.0981	11.6595	77.8862	9.56403	56.7881	15.0803	10.1667		A-1T;A68C	20	30	5	0	18	38.8889	11	27.2727	8	37.5	14	78.5714	7	42.8571	8	87.5	11	90.9091	2	0	10	70	8	87.5	5	40
A-1T;A68G	0.000326111	0.000122618	7.90754	3.08212	59.87	3.57166	51.9624	4.71765	44.6667		A-1T;A68G	57	7.01754	33	12.1212	75	18.6667	56	26.7857	49	44.898	61	47.541	50	46	24	75	32	68.75	27	55.5556	36	50	36	58.3333	38	2.63158
A-1T;A68T	0.000629905	0.000114233	8.45938	1.38896	69.7357	2.36681	61.2763	2.74427	67.0833		A-1T;A68T	129	7.75194	66	16.6667	99	15.1515	55	21.8182	98	36.7347	96	47.9167	60	66.6667	29	62.069	34	61.7647	40	67.5	50	68	49	69.3878	48	2.08333
A-1T;A69C	0.000148489	0.000107722	20.339	7.27457	70.954	4.681	50.6149	8.6505	8.5		A-1T;A69C	13	15.3846	4	50	11	36.3636	7	42.8571	9	44.4444	12	83.3333	14	71.4286	5	60	5	80	1	100	9	66.6667	12	66.6667	17	29.4118
A-1T;A69G	0.000461805	0.000136121	5.67526	2.69735	72.5847	3.79228	66.9095	4.65371	49.8333		A-1T;A69G	88	6.81818	30	6.66667	62	14.5161	57	19.2982	67	44.7761	74	59.4595	37	70.2703	31	80.6452	27	70.3704	24	75	64	62.5	37	64.8649	32	6.25
A-1T;A69T	0.000895642	0.000730278	12.1324	2.78546	34.9016	3.61362	22.7693	4.56257	74.25		A-1T;A69T	128	14.0625	42	9.52381	105	14.2857	70	11.4286	92	20.6522	85	31.7647	73	30.137	40	25	54	35.1852	53	20.7547	76	43.4211	73	36.9863	41	12.1951
A-1T;T70A	0.000816428	0.000316215	8.437	2.60982	62.41	4.45048	53.973	5.15926	42		A-1T;T70A	71	5.6338	46	15.2174	47	19.1489	35	14.2857	63	31.746	62	41.9355	29	48.2759	24	37.5	24	66.6667	25	64	34	52.9412	44	70.4545	19	21.0526
A-1T;T70C	0.000250478	0.000172837	5.59878	3.16352	39.86	4.16137	34.2612	5.22732	31.3333		A-1T;T70C	54	5.55556	24	4.16667	37	16.2162	31	22.5806	31	32.2581	50	32	32	31.25	22	22.7273	21	33.3333	24	58.3333	20	55	30	36.6667	26	7.69231
A-1T;T70G	0.000404443	0.000402226	6.44804	10.1373	75.3328	9.40692	68.8848	13.8295	2.75		A-1T;T70G	4	0	2	0	4	0	0	NA	4	50	3	66.6667	5	80	2	100	1	0	3	100	0	NA	5	60	5	0
A-1T;A71C	0.00166223	0.000841547	2.84517	2.43733	61.0538	7.68538	58.2086	8.06261	9.91667		A-1T;A71C	18	0	10	10	16	6.25	11	0	8	12.5	16	25	7	57.1429	7	42.8571	8	75	6	50	8	50	4	50	7	0
A-1T;A71G	0.000461792	0.000157527	10.3182	3.09244	69.884	3.87186	59.5658	4.95525	31		A-1T;A71G	51	11.7647	23	8.69565	51	17.6471	39	33.3333	36	36.1111	52	61.5385	30	53.3333	15	66.6667	14	78.5714	9	66.6667	25	76	27	59.2593	37	16.2162
A-1T;A71T	0.00910212	0.00362465	8.66936	2.53492	91.7985	8.77823	83.1291	9.13691	20.6667		A-1T;A71T	33	12.1212	7	0	31	9.67742	13	7.69231	33	12.1212	38	13.1579	12	16.6667	13	38.4615	19	73.6842	17	64.7059	20	85	12	75	12	8.33333
A-1T;A72C	0.00125846	0.00058791	17.543	2.91266	59.3197	3.83299	41.7767	4.81408	24.25		A-1T;A72C	46	19.5652	8	12.5	32	15.625	17	23.5294	36	30.5556	29	34.4828	24	54.1667	15	53.3333	25	48	17	52.9412	26	69.2308	16	50	18	11.1111
A-1T;A72G	0.000488187	0.000198203	7.5759	3.05805	62.5089	4.55806	54.933	5.48886	42.5833		A-1T;A72G	82	8.53659	37	13.5135	53	9.43396	40	22.5	62	35.4839	58	62.069	38	47.3684	20	45	26	65.3846	32	65.625	31	58.0645	32	59.375	30	3.33333
A-1T;A72T	0.00113255	0.000473223	8.9357	2.6334	62.7091	4.92795	53.7734	5.58744	67.3333		A-1T;A72T	113	8.84956	59	10.1695	96	10.4167	56	28.5714	91	29.6703	90	35.5556	74	44.5946	40	35	52	69.2308	24	58.3333	65	67.6923	48	56.25	39	7.69231
A-1T;A73C	0.000308887	0.000455485	4.22299	9.62852	44.6004	11.0501	40.3774	14.6565	11.9167		A-1T;A73C	20	5	7	28.5714	24	4.16667	5	20	18	38.8889	19	63.1579	13	61.5385	6	0	5	40	11	63.6364	10	40	5	60	11	9.09091
A-1T;A73G	0.000379006	0.000176233	8.41847	3.70765	62.9669	4.85941	54.5484	6.11233	31.1667		A-1T;A73G	56	7.14286	20	20	44	20.4545	32	15.625	33	42.4242	49	59.1837	27	70.3704	14	50	17	47.0588	25	60	36	58.3333	21	66.6667	15	0
A-1T;A73T	0.00245575	0.00133016	7.62179	1.73871	37.5645	4.12882	29.9427	4.47998	62.1667		A-1T;A73T	92	7.6087	34	8.82353	91	5.49451	54	11.1111	100	16	84	21.4286	68	19.1176	36	27.7778	44	22.7273	36	33.3333	59	35.5932	48	47.9167	34	29.4118
A-1T;A74C	0.000843834	0.000597468	7.23196	3.97676	53.6559	7.17026	46.4239	8.19922	20.1667		A-1T;A74C	32	9.375	15	0	31	22.5806	18	16.6667	26	23.0769	33	36.3636	19	26.3158	6	83.3333	18	55.5556	9	44.4444	9	44.4444	26	53.8462	17	5.88235
A-1T;A74G	0.000521855	0.000160304	3.9477	2.4645	64.3989	3.91062	60.4512	4.62242	33.75		A-1T;A74G	46	4.34783	31	9.67742	37	5.40541	48	25	47	31.9149	52	55.7692	23	56.5217	19	52.6316	20	65	20	65	31	67.7419	31	54.8387	29	13.7931
A-1T;A74T	0.00113661	0.00050421	9.01122	2.86178	61.4669	5.14258	52.4556	5.88523	88.0833		A-1T;A74T	167	10.7784	65	9.23077	129	12.4031	77	11.6883	126	28.5714	123	43.9024	79	41.7722	37	37.8378	57	49.1228	55	76.3636	74	52.7027	68	61.7647	40	17.5
A-1T;C75A	0.00244736	0.00308855	18.0609	6.32014	56.2379	9.63077	38.177	11.5194	13.0833		A-1T;C75A	24	25	11	9.09091	11	9.09091	10	20	17	41.1765	20	20	7	28.5714	6	50	7	85.7143	12	33.3333	22	54.5455	10	50	9	0
A-1T;C75G	0.000164808	0.000134951	2.05288	3.6778	56.8392	7.86999	54.7863	8.68695	7.41667		A-1T;C75G	20	0	6	0	7	14.2857	7	42.8571	10	30	8	75	3	33.3333	3	100	6	33.3333	2	50	9	55.5556	8	37.5	4	25
A-1T;C75T	0.00184887	0.000859774	8.64713	1.9158	49.1306	4.28105	40.4834	4.69017	39		A-1T;C75T	76	6.57895	40	7.5	49	12.2449	37	16.2162	37	21.6216	52	21.1538	28	35.7143	20	40	29	27.5862	26	50	34	55.8824	40	50	22	9.09091
A-1T;A76C	0.00051444	0.00159793	12.1607	8.60721	28.0177	8.54896	15.857	12.1313	13.75		A-1T;A76C	26	11.5385	11	18.1818	23	13.0435	17	5.88235	16	31.25	12	25	13	46.1538	7	57.1429	7	0	8	25	16	18.75	9	66.6667	7	14.2857
A-1T;A76G	0.000918787	0.000331661	11.7131	2.57676	63.3722	3.7631	51.6591	4.56077	38.3333		A-1T;A76G	63	12.6984	28	10.7143	62	12.9032	27	29.6296	49	32.6531	58	36.2069	41	53.6585	9	77.7778	26	53.8462	28	60.7143	36	55.5556	33	69.697	33	24.2424
A-1T;A76T	0.00100026	0.000407074	9.92041	2.4517	57.4943	4.13582	47.5739	4.8079	76.5833		A-1T;A76T	127	11.811	72	5.55556	118	21.1864	57	17.5439	99	22.2222	106	36.7925	56	53.5714	43	46.5116	49	55.102	50	52	76	63.1579	66	50	55	12.7273
A-1T;T77A	0.00023983	0.000222043	12.558	3.21048	32.0233	2.89154	19.4653	4.32067	55.75		A-1T;T77A	85	11.7647	40	12.5	73	20.5479	46	21.7391	63	22.2222	93	30.1075	55	27.2727	33	33.3333	37	24.3243	29	20.6897	53	47.1698	62	32.2581	24	16.6667
A-1T;T77C	0.000436203	0.00043049	9.26903	3.67498	33.7507	4.06655	24.4816	5.48109	48.9167		A-1T;T77C	78	11.5385	33	6.06061	66	10.6061	27	22.2222	56	25	71	29.5775	45	17.7778	35	51.4286	26	38.4615	40	37.5	63	33.3333	47	25.5319	36	8.33333
A-1T;T77G	0.00174174	0.00243638	39.2375	5.00872	14.0831	6.69816	-25.1544	8.36377	2.66667		A-1T;T77G	9	33.3333	3	33.3333	2	50	2	50	5	20	3	33.3333	1	0	1	0	4	0	1	0	0	NA	1	0	3	0
A-1T;A78C	0.000951204	0.00225102	6.65372	7.00385	28.4214	9.50685	21.7677	11.8082	10.0833		A-1T;A78C	10	30	4	0	15	0	7	28.5714	13	23.0769	16	31.25	13	7.69231	10	30	7	14.2857	8	12.5	9	44.4444	9	44.4444	9	11.1111
A-1T;A78G	0.000717313	0.000456816	10.3279	4.16094	56.9598	6.29246	46.6319	7.54377	31.6667		A-1T;A78G	58	10.3448	22	13.6364	49	16.3265	31	9.67742	38	44.7368	42	38.0952	44	45.4545	13	76.9231	21	47.619	12	41.6667	22	63.6364	28	50	24	25
A-1T;A78T	0.0015305	0.000599391	13.3455	2.0793	54.497	3.72117	41.1516	4.2627	79.9167		A-1T;A78T	145	10.3448	54	22.2222	99	19.1919	88	19.3182	105	24.7619	110	30.9091	83	38.5542	39	38.4615	57	59.6491	35	45.7143	76	48.6842	68	58.8235	57	14.0351
A-1T;G79A	0.000662885	0.000517968	6.63295	2.34438	30.6983	4.08193	24.0653	4.70726	40.5		A-1T;G79A	75	5.33333	34	14.7059	60	6.66667	35	11.4286	45	28.8889	58	17.2414	41	19.5122	22	36.3636	27	37.037	20	35	32	25	37	29.7297	34	2.94118
A-1T;G79C	0.0248762	0.0623229	11.4455	4.03545	41.386	29.7674	29.9405	30.0397	4.16667		A-1T;G79C	4	0	4	25	3	0	5	0	6	33.3333	8	0	5	20	3	0	3	33.3333	5	20	1	0	3	33.3333	0	NA
A-1T;G79T	0.00241671	0.00160001	3.10011	2.15111	44.6386	7.46827	41.5385	7.77189	58.4167		A-1T;G79T	109	8.25688	48	0	78	6.41026	51	9.80392	65	16.9231	84	10.7143	47	31.9149	40	35	38	34.2105	33	54.5455	49	57.1429	59	28.8136	48	10.4167
A-1T;A80C	0.000119171	8.75458e-05	4.53676	5.29069	52.9143	6.02908	48.3776	8.02129	10.4167		A-1T;A80C	12	0	11	18.1818	20	20	8	62.5	10	30	13	38.4615	10	30	6	33.3333	3	66.6667	3	66.6667	14	64.2857	15	66.6667	4	0
A-1T;A80G	0.000511211	0.000281998	4.97004	2.60569	48.5281	5.71328	43.558	6.27943	37.25		A-1T;A80G	67	2.98507	33	6.06061	61	19.6721	36	27.7778	60	18.3333	52	34.6154	24	41.6667	16	62.5	16	37.5	20	65	36	47.2222	26	38.4615	40	2.5
A-1T;A80T	0.00137235	0.000420377	9.63024	2.38836	74.2632	4.25181	64.633	4.8767	80.75		A-1T;A80T	137	7.29927	53	15.0943	133	22.5564	85	14.1176	90	23.3333	125	46.4	78	51.2821	29	48.2759	60	70	43	72.093	72	69.4444	64	76.5625	60	11.6667
A-1T;G81A	0.00413846	0.00302563	9.64748	2.81175	50.0857	8.07709	40.4382	8.55251	29.8333		A-1T;G81A	41	9.7561	28	7.14286	47	6.38298	29	13.7931	38	21.0526	55	25.4545	25	12	15	26.6667	13	61.5385	13	46.1538	33	51.5152	21	38.0952	15	13.3333
A-1T;G81C	3e-07	3.86338e-05	12.5044	9.55331	26.2336	5.96579	13.7292	11.2631	1.5		A-1T;G81C	3	0	1	0	3	33.3333	1	0	4	25	3	0	2	50	0	NA	0	NA	0	NA	0	NA	1	0	0	NA
A-1T;G81T	0.000164587	0.000177737	6.31976	2.38954	19.0017	2.36896	12.682	3.3648	42.0833		A-1T;G81T	70	5.71429	23	4.34783	53	15.0943	48	10.4167	59	13.5593	68	17.6471	40	22.5	21	19.0476	22	27.2727	31	19.3548	44	22.7273	26	7.69231	23	13.0435
A-1T;A82C	0.000548448	0.000539879	3.18041	4.97941	37.693	6.55739	34.5126	8.2337	7.83333		A-1T;A82C	7	0	10	10	12	0	5	0	9	22.2222	15	33.3333	8	50	2	0	7	28.5714	8	50	5	40	6	16.6667	2	0
A-1T;A82G	0.00163325	0.00305251	12.4693	1.45121	16.9982	1.86178	4.52893	2.36056	57.1667		A-1T;A82G	76	13.1579	30	13.3333	82	9.7561	56	14.2857	69	14.4928	120	13.3333	49	12.2449	28	21.4286	37	21.6216	40	17.5	42	14.2857	57	14.0351	43	9.30233
A-1T;A82T	2.82065e-05	0.00022197	6.87915	4.45399	9.47767	2.23623	2.59852	4.98385	80.75		A-1T;A82T	128	7.03125	55	3.63636	120	11.6667	48	16.6667	111	13.5135	106	13.2075	82	13.4146	55	27.2727	55	7.27273	57	1.75439	90	13.3333	62	4.83871	40	12.5
A-1T;A83C	0.0659962	0.364875	12.7932	2.97432	0	33.2129	-12.7932	33.3458	16.9167		A-1T;A83C	29	6.89655	12	25	30	20	18	5.55556	10	10	27	14.8148	19	5.26316	14	28.5714	14	14.2857	11	0	8	25	11	0	12	8.33333
A-1T;A83G	0.000156728	0.000303066	6.09022	3.03236	14.0194	2.1309	7.92915	3.7062	60.9167		A-1T;A83G	90	8.88889	43	2.32558	77	7.79221	52	17.3077	77	15.5844	80	12.5	58	13.7931	51	5.88235	48	12.5	36	13.8889	76	18.4211	43	16.2791	43	2.32558
A-1T;A83T	0.0119623	0.015484	11.6235	1.55262	27.0428	5.77767	15.4193	5.98265	78.0833		A-1T;A83T	127	11.811	47	19.1489	99	11.1111	56	7.14286	107	10.2804	104	15.3846	72	12.5	47	27.6596	68	17.6471	57	17.5439	66	21.2121	87	28.7356	53	5.66038
A-1T;A84C	0.00323968	0.00309485	13.0093	4.40771	62.8799	10.973	49.8706	11.8252	10.1667		A-1T;A84C	19	5.26316	6	0	20	20	15	26.6667	12	41.6667	7	28.5714	11	18.1818	3	33.3333	4	75	5	40	13	69.2308	7	57.1429	8	25
A-1T;A84G	0.498326	4.89281	14.1523	1.81531	100	723.288	85.8477	723.29	43.6667		A-1T;A84G	56	16.0714	34	11.7647	66	12.1212	38	10.5263	54	9.25926	62	17.7419	45	22.2222	25	20	37	10.8108	29	31.0345	38	15.7895	40	30	23	8.69565
A-1T;A84T	0.000358303	0.000200171	8.92985	4.26462	62.0606	5.09062	53.1308	6.64088	52.1667		A-1T;A84T	92	10.8696	50	10	85	14.1176	36	47.2222	63	41.2698	63	55.5556	43	48.8372	34	41.1765	41	65.8537	34	47.0588	48	75	37	62.1622	41	17.0732
A-1T;T85A	0.53547	5.14946	13.7677	1.53941	100	719.704	86.2323	719.706	65		A-1T;T85A	92	10.8696	42	9.52381	79	12.6582	59	10.1695	93	19.3548	96	16.6667	73	12.3288	53	16.9811	42	21.4286	43	20.9302	49	12.2449	59	32.2034	42	19.0476
A-1T;T85C	0.00341325	0.0021032	7.56368	1.77738	36.3859	4.61545	28.8222	4.94585	68.75		A-1T;T85C	107	11.215	38	2.63158	91	5.49451	68	10.2941	85	17.6471	101	15.8416	67	16.4179	45	24.4444	54	33.3333	37	21.6216	67	35.8209	65	40	37	2.7027
A-1T;T85G	0.420107	4.4199	7.28671	2.52423	100	826.838	92.7133	826.842	12.0833		A-1T;T85G	17	5.88235	12	25	9	11.1111	10	10	16	6.25	12	8.33333	19	0	7	14.2857	9	11.1111	9	11.1111	13	7.69231	12	33.3333	11	0
A-1T;T86A	0.0050053	0.0134066	11.014	1.59994	16.0957	2.97685	5.08177	3.37956	65.8333		A-1T;T86A	97	18.5567	63	9.52381	66	9.09091	52	9.61538	82	7.31707	74	12.1622	62	12.9032	40	12.5	65	16.9231	49	16.3265	65	15.3846	75	13.3333	37	8.10811
A-1T;T86C	0.00361318	0.00328649	7.52975	1.73115	24.9952	4.26082	17.4655	4.59907	62.4167		A-1T;T86C	98	7.14286	54	3.7037	75	8	51	13.7255	86	16.2791	83	8.43373	69	11.5942	31	25.8065	51	27.451	34	17.6471	71	21.1268	46	26.087	43	2.32558
A-1T;T86G	0.0044238	0.0253869	28.5086	9.74027	13.5286	18.8492	-14.9799	21.2171	5.75		A-1T;T86G	12	33.3333	3	0	6	16.6667	2	50	14	21.4286	4	50	4	50	6	33.3333	7	0	6	0	3	66.6667	2	50	2	0
A-1T;C87A	0.00242088	0.000802718	6.55273	1.27021	44.1332	3.18416	37.5805	3.42816	46.5833		A-1T;C87A	66	6.06061	39	5.12821	59	5.08475	39	15.3846	67	16.4179	75	18.6667	35	22.8571	31	25.8065	33	39.3939	28	46.4286	50	44	37	40.5405	36	2.77778
A-1T;C87G	3e-07	4.44856e-05	5.00862	2.40494	7.90729	1.07499	2.89867	2.63426	7.75		A-1T;C87G	9	0	4	0	16	6.25	9	11.1111	6	0	12	8.33333	3	0	8	0	4	0	5	0	8	0	9	0	1	0
A-1T;C87T	0.00438557	0.00333743	8.77223	3.12936	57.1122	9.8015	48.34	10.2889	30.0833		A-1T;C87T	39	2.5641	20	15	50	10	36	16.6667	35	25.7143	45	31.1111	28	17.8571	17	17.6471	22	45.4545	16	62.5	19	47.3684	34	58.8235	17	0
A-1T;T88A	0.244088	1.10674	11.2263	1.3534	57.8427	161.696	46.6164	161.702	98.25		A-1T;T88A	148	8.78378	44	9.09091	128	11.7188	102	8.82353	150	15.3333	124	15.3226	106	8.49057	59	10.1695	80	23.75	75	10.6667	89	20.2247	74	24.3243	54	9.25926
A-1T;T88C	3.03734e-05	5.43821e-05	7.46533	2.76459	16.5	1.69408	9.03468	3.24235	71.5833		A-1T;T88C	99	7.07071	31	9.67742	113	15.0442	50	10	99	21.2121	92	14.1304	80	20	37	24.3243	61	19.6721	55	9.09091	77	18.1818	65	12.3077	44	6.81818
A-1T;T88G	3e-07	3.44953e-05	3.13888	5.78382	16.4267	4.24338	13.2878	7.17348	14		A-1T;T88G	15	0	18	33.3333	18	22.2222	22	9.09091	7	0	23	17.3913	9	0	9	33.3333	10	30	14	21.4286	11	45.4545	12	16.6667	10	0
A-1T;C89A	0.00695505	0.0113345	3.44591	2.09876	20.5225	7.52206	17.0766	7.80937	35.75		A-1T;C89A	48	10.4167	30	10	58	6.89655	32	0	30	0	65	4.61538	35	22.8571	19	10.5263	24	12.5	23	17.3913	33	15.1515	32	18.75	29	10.3448
A-1T;C89G	0.000452923	0.000842922	2.97217	6.5648	25.1063	7.0867	22.1341	9.66012	9		A-1T;C89G	15	6.66667	4	0	18	0	6	50	10	10	11	18.1818	6	50	2	50	6	33.3333	6	16.6667	8	25	16	12.5	2	0
A-1T;C89T	0.000348369	0.00102685	10.0275	4.287	18.6124	3.88461	8.58492	5.78521	43.0833		A-1T;C89T	66	12.1212	35	5.71429	51	9.80392	24	16.6667	57	26.3158	64	10.9375	41	9.7561	28	21.4286	54	33.3333	17	23.5294	36	16.6667	44	13.6364	22	13.6364
A-1T;A90C	0.000297842	0.000763023	8.78188	5.63644	21.9242	4.62034	13.1423	7.28814	12.75		A-1T;A90C	15	26.6667	13	0	21	19.0476	11	9.09091	6	16.6667	19	21.0526	13	15.3846	8	12.5	14	21.4286	8	37.5	13	15.3846	12	16.6667	10	20
A-1T;A90G	0.00132861	0.00210398	7.41733	1.86761	15.1979	2.47918	7.7806	3.10392	85.6667		A-1T;A90G	124	8.87097	50	12	108	6.48148	109	6.42202	91	12.0879	112	9.82143	80	16.25	65	15.3846	75	17.3333	55	9.09091	75	24	84	11.9048	36	2.77778
A-1T;A90T	6.23631e-06	1.56911e-05	3.17378	1.14352	11.6876	0.94218	8.51382	1.48167	87.25		A-1T;A90T	141	2.83688	60	11.6667	98	8.16327	76	11.8421	118	11.8644	115	13.0435	104	10.5769	61	6.55738	67	11.9403	51	11.7647	82	10.9756	74	17.5676	57	14.0351
A-1T;G91A	0.0244322	0.0386511	7.21272	1.27997	22.1311	8.78984	14.9184	8.88255	51.75		A-1T;G91A	84	8.33333	33	3.0303	75	5.33333	51	9.80392	60	6.66667	71	7.04225	42	14.2857	27	11.1111	37	5.40541	33	24.2424	60	18.3333	48	16.6667	27	11.1111
A-1T;G91C	0.785519	34.4519	10.8732	4.17363	100	3568.43	89.1268	3568.44	16.6667		A-1T;G91C	30	10	12	0	20	40	16	6.25	19	10.5263	27	22.2222	20	5	10	20	8	37.5	13	0	15	40	10	20	13	0
A-1T;G91T	0.000183722	0.000237686	4.20466	2.28854	16.386	2.78465	12.1813	3.6044	70.8333		A-1T;G91T	124	3.22581	54	12.963	92	6.52174	49	16.3265	89	10.1124	115	15.6522	71	9.85915	51	15.6863	49	18.3673	42	33.3333	52	9.61538	62	24.1935	36	5.55556
A-1T;G92A	0.00761588	0.00311133	7.99232	0.964134	40.7711	4.11573	32.7788	4.22715	71.5		A-1T;G92A	113	6.19469	56	12.5	127	8.66142	65	9.23077	88	10.2273	109	15.5963	77	12.987	36	22.2222	37	35.1351	45	31.1111	63	36.5079	42	38.0952	48	6.25
A-1T;G92C	0.054883	0.249157	10.8784	2.56594	24.8593	29.5821	13.9809	29.6932	14.75		A-1T;G92C	14	14.2857	9	0	19	21.0526	12	16.6667	16	6.25	19	5.26316	14	14.2857	17	5.88235	7	28.5714	12	8.33333	20	20	18	16.6667	10	10
A-1T;G92T	0.000246115	0.000467909	3.82213	5.4386	20.081	4.21446	16.2589	6.88041	29.6667		A-1T;G92T	37	10.8108	20	0	27	3.7037	23	13.0435	23	17.3913	53	24.5283	27	14.8148	22	22.7273	38	42.1053	28	17.8571	34	8.82353	24	12.5	20	0
A-1T;C93A	0.00730716	0.00405044	7.59992	2.37713	73.4424	9.09195	65.8424	9.39757	22.9167		A-1T;C93A	51	11.7647	15	6.66667	35	2.85714	25	20	20	5	36	19.4444	17	35.2941	10	30	16	43.75	9	66.6667	20	55	21	76.1905	12	0
A-1T;C93G	0.019261	0.0204759	8.92623	4.02985	69.1185	22.5204	60.1923	22.8781	6.25		A-1T;C93G	9	11.1111	3	0	6	0	5	40	8	0	11	9.09091	6	0	8	37.5	8	37.5	1	0	3	66.6667	7	57.1429	6	16.6667
A-1T;C93T	0.00126978	0.000452476	6.36323	2.59816	74.5964	5.82484	68.2332	6.37803	42.4167		A-1T;C93T	84	4.7619	33	12.1212	65	13.8462	39	12.8205	65	23.0769	68	38.2353	36	58.3333	17	70.5882	22	86.3636	26	50	26	65.3846	28	75	16	6.25
A-1T;A94C	0.000651691	0.000304234	1.92761	2.49869	73.7651	7.55896	71.8375	7.96124	14.4167		A-1T;A94C	29	0	8	0	10	10	13	23.0769	24	41.6667	32	31.25	14	78.5714	8	87.5	8	62.5	8	75	15	73.3333	4	50	7	14.2857
A-1T;A94G	0.00152336	0.000387846	10.1224	1.59482	65.552	3.08935	55.4295	3.47672	48.3333		A-1T;A94G	70	8.57143	62	12.9032	74	12.1622	47	23.4043	62	25.8065	66	33.3333	32	37.5	28	60.7143	19	63.1579	28	64.2857	52	67.3077	40	57.5	46	13.0435
A-1T;A94T	0.0008297	0.000200625	7.83993	1.73794	63.605	2.99651	55.7651	3.46403	73.75		A-1T;A94T	113	7.07965	52	9.61538	123	13.0081	76	23.6842	100	25	120	42.5	58	50	49	67.3469	28	60.7143	38	50	69	60.8696	59	66.1017	68	13.2353
A-1T;A95C	0.000407758	0.000258812	2.97664	6.43525	71.3009	7.57431	68.3243	9.93895	10.5833		A-1T;A95C	13	7.69231	11	0	8	12.5	16	18.75	15	33.3333	11	81.8182	10	70	7	57.1429	6	66.6667	12	83.3333	8	37.5	10	70	11	18.1818
A-1T;A95G	0.00159404	0.000604931	10.1903	3.55872	75.8227	5.14743	65.6325	6.25783	55.6667		A-1T;A95G	58	13.7931	45	13.3333	78	15.3846	57	12.2807	89	21.3483	93	43.0108	42	61.9048	45	60	28	82.1429	32	53.125	49	75.5102	52	71.1538	36	16.6667
A-1T;A95T	0.00186421	0.000358827	15.2427	1.49937	73.7429	2.32854	58.5003	2.76951	80.5		A-1T;A95T	131	18.3206	51	17.6471	110	16.3636	88	18.1818	112	25.8929	130	40.7692	50	50	52	65.3846	64	67.1875	44	72.7273	64	67.1875	70	71.4286	61	8.19672
A-1T;A96C	0.00130101	0.000626838	5.55303	3.59049	78.4349	6.56083	72.8819	7.47905	12.6667		A-1T;A96C	22	4.54545	5	0	26	7.69231	12	8.33333	16	37.5	9	33.3333	17	47.0588	5	60	12	91.6667	7	71.4286	11	63.6364	10	70	22	9.09091
A-1T;A96G	0.000734638	0.000320912	2.52869	2.50686	65.107	5.94759	62.5783	6.45431	32.6667		A-1T;A96G	57	1.75439	19	15.7895	58	5.17241	27	29.6296	49	30.6122	39	38.4615	22	50	25	64	23	43.4783	19	84.2105	27	59.2593	27	59.2593	24	8.33333
A-1T;A96T	0.00150666	0.000724954	6.29318	2.88587	61.7318	5.83551	55.4386	6.5101	52.3333		A-1T;A96T	77	5.19481	40	7.5	83	9.63855	47	8.51064	71	23.9437	82	42.6829	30	23.3333	25	36	38	50	30	70	38	50	67	68.6567	38	5.26316
A-1T;A97C	0.00103735	0.00094	15.0603	6.93135	61.8797	9.14345	46.8194	11.4737	11.25		A-1T;A97C	18	16.6667	6	16.6667	18	27.7778	15	6.66667	21	33.3333	19	57.8947	6	33.3333	5	60	3	33.3333	5	80	9	66.6667	10	50	8	0
A-1T;A97G	0.000501058	0.000141488	10.1684	2.31674	62.6023	2.87005	52.434	3.68843	98.1667		A-1T;A97G	144	11.8056	69	10.1449	145	16.5517	126	30.1587	145	37.2414	129	45.7364	76	57.8947	48	50	58	72.4138	55	58.1818	107	56.0748	76	65.7895	73	10.9589
A-1T;A97T	0.00042062	0.000141976	10.6931	2.89629	65.2043	3.46802	54.5113	4.51837	58		A-1T;A97T	97	10.3093	45	22.2222	74	18.9189	64	21.875	83	44.5783	72	56.9444	43	62.7907	30	60	54	61.1111	39	69.2308	45	68.8889	50	52	36	2.77778
A-1T;G98A	0.000511014	0.000236856	9.0205	3.23496	56.7026	4.4528	47.6821	5.50385	27.6667		A-1T;G98A	37	5.40541	22	27.2727	41	14.6341	24	25	45	28.8889	38	44.7368	25	52	15	46.6667	19	68.4211	20	45	28	60.7143	18	50	19	10.5263
A-1T;G98C	0.000612285	0.00062355	4.62077	6.65714	57.5404	10.3197	52.9197	12.2807	3.83333		A-1T;G98C	7	0	2	0	8	0	3	33.3333	3	66.6667	8	25	3	66.6667	1	0	1	0	5	60	4	75	1	100	3	0
A-1T;G98T	0.000552013	0.00043904	9.8798	5.52816	54.2869	6.90967	44.4071	8.84896	24.8333		A-1T;G98T	35	8.57143	14	7.14286	33	15.1515	26	30.7692	38	26.3158	43	46.5116	22	50	12	16.6667	22	50	12	41.6667	20	55	21	76.1905	22	13.6364
A-1T;A99C	0.00117143	0.00182493	13.441	6.76179	45.5704	9.63539	32.1294	11.7713	5.08333		A-1T;A99C	10	20	6	0	7	28.5714	3	0	3	0	7	28.5714	4	50	5	60	4	25	3	33.3333	4	75	5	20	5	20
A-1T;A99G	0.00261834	0.0011821	9.79051	2.68456	70.0618	6.35494	60.2713	6.8987	28.4167		A-1T;A99G	43	4.65116	21	14.2857	54	18.5185	26	11.5385	35	25.7143	45	26.6667	21	33.3333	12	41.6667	22	72.7273	22	63.6364	20	55	20	75	23	4.34783
A-1T;A99T	0.000728028	0.000362079	6.98911	3.35524	61.6749	5.88036	54.6858	6.77024	50.5		A-1T;A99T	93	6.45161	51	11.7647	77	15.5844	45	8.88889	66	31.8182	63	42.8571	28	71.4286	40	65	30	50	27	48.1481	49	48.9796	37	70.2703	34	2.94118
A-1T;A100C	3e-07	1.83981e-05	34.3367	13.7904	14.3848	4.41863	-19.9519	14.481	8.33333		A-1T;A100C	15	33.3333	6	0	14	14.2857	8	0	8	0	7	14.2857	7	14.2857	3	0	5	20	10	10	6	16.6667	11	54.5455	4	25
A-1T;A100G	0.00127853	0.000481464	8.82815	2.6772	65.2616	4.60145	56.4334	5.3236	43.75		A-1T;A100G	73	10.9589	26	3.84615	64	18.75	38	7.89474	67	28.3582	62	43.5484	35	40	29	55.1724	25	60	31	58.0645	38	68.4211	37	64.8649	30	6.66667
A-1T;A100T	0.0203218	0.00975641	7.38093	1.12589	55.5665	8.80414	48.1855	8.87584	65.3333		A-1T;A100T	80	10	51	3.92157	86	9.30233	66	6.06061	95	10.5263	102	7.84314	59	10.1695	44	25	56	21.4286	47	38.2979	53	43.3962	45	44.4444	46	6.52174
A-1T;T101A	0.00144952	0.000644152	6.86609	2.85671	58.218	5.25476	51.3519	5.98108	57.1667		A-1T;T101A	69	11.5942	47	8.51064	92	7.6087	57	8.77193	94	20.2128	89	29.2135	35	45.7143	35	65.7143	32	53.125	39	66.6667	48	45.8333	49	48.9796	41	7.31707
A-1T;T101C	0.000264189	0.000153323	8.13485	4.44979	58.0456	4.91757	49.9108	6.63197	51		A-1T;T101C	76	10.5263	46	6.52174	83	21.6867	45	46.6667	51	29.4118	94	56.383	36	41.6667	26	38.4615	27	62.963	33	63.6364	48	60.4167	47	59.5745	56	12.5
A-1T;T101G	0.000678024	0.000849734	13.7396	10.0695	57.5747	9.47418	43.8351	13.8259	5.58333		A-1T;T101G	7	28.5714	5	0	1	0	7	14.2857	10	30	9	44.4444	6	50	1	100	3	100	7	28.5714	7	42.8571	4	50	7	0
A-1T;T102A	0.0010975	0.000542559	9.58179	3.22711	56.7319	5.05293	47.1501	5.99553	40.3333		A-1T;T102A	58	15.5172	29	3.44828	52	19.2308	35	11.4286	60	23.3333	64	37.5	31	41.9355	29	62.069	27	48.1481	24	45.8333	44	50	31	64.5161	27	14.8148
A-1T;T102C	0.00117581	0.000512943	12.1619	3.28368	68.2294	4.96873	56.0676	5.95574	36.5		A-1T;T102C	61	11.4754	22	9.09091	49	14.2857	37	21.6216	52	40.3846	59	38.9831	22	45.4545	32	43.75	28	67.8571	26	57.6923	23	65.2174	27	81.4815	21	14.2857
A-1T;T102G	0.00358337	0.00335698	6.74674	4.04541	59.5851	12.2138	52.8384	12.8663	2.66667		A-1T;T102G	9	0	1	0	2	0	3	0	4	0	2	0	1	0	1	100	4	25	2	50	1	100	2	50	0	NA
A-1T;A103C	0.0411119	0.104225	33.1657	10.54	100	64.6203	66.8343	65.4743	2.75		A-1T;A103C	4	0	0	NA	3	66.6667	4	25	0	NA	4	75	3	66.6667	4	25	2	50	5	40	1	100	3	100	2	0
A-1T;A103G	0.000340099	0.000199158	11.5682	4.44899	57.0828	4.86957	45.5146	6.59593	21.6667		A-1T;A103G	33	9.09091	16	18.75	21	23.8095	24	25	35	31.4286	29	55.1724	20	65	21	66.6667	14	42.8571	13	61.5385	17	41.1765	17	52.9412	19	15.7895
A-1T;A103T	0.00267332	0.00127062	12.9071	3.28757	75.0925	6.24373	62.1854	7.05636	36.6667		A-1T;A103T	49	14.2857	34	11.7647	53	9.43396	46	19.5652	41	31.7073	54	37.037	37	40.5405	21	47.619	31	61.2903	26	65.3846	23	52.1739	25	88	27	7.40741
A-1T;T104A	0.0024602	0.00079327	12.7658	1.93352	62.6327	3.42707	49.8669	3.93488	61.5833		A-1T;T104A	82	12.1951	37	13.5135	88	12.5	63	19.0476	84	20.2381	94	30.8511	40	50	45	37.7778	45	46.6667	37	59.4595	56	64.2857	68	63.2353	52	9.61538
A-1T;T104C	0.00077643	0.000429871	9.14534	3.31771	51.5578	4.81308	42.4125	5.84576	37.5		A-1T;T104C	57	15.7895	31	3.22581	49	22.449	36	11.1111	42	26.1905	69	40.5797	20	40	16	43.75	20	50	30	43.3333	45	48.8889	35	57.1429	29	6.89655
A-1T;T104G	0.000287091	0.0002195	4.85659	3.32205	50.0005	6.17445	45.1439	7.0114	2.83333		A-1T;T104G	10	0	2	0	3	0	1	0	1	0	4	50	0	NA	6	50	1	100	0	NA	3	33.3333	3	33.3333	1	0
A-1T;A105C	0.000275007	0.000461042	5.72962	8.43225	40.0684	9.33643	34.3388	12.5806	3.25		A-1T;A105C	6	0	4	0	5	0	1	0	3	66.6667	5	20	3	33.3333	3	0	5	60	1	100	1	0	2	50	4	0
A-1T;A105G	0.00116195	0.000946144	16.8416	6.70133	68.156	8.68793	51.3144	10.9721	26.8333		A-1T;A105G	39	17.9487	24	16.6667	43	27.907	22	18.1818	29	13.7931	45	55.5556	25	60	14	85.7143	15	53.3333	17	52.9412	22	54.5455	27	70.3704	15	26.6667
A-1T;A105T	0.00201955	0.000743159	9.28437	1.75796	48.8525	3.49292	39.5682	3.91036	40.0833		A-1T;A105T	63	7.93651	21	4.7619	56	17.8571	46	10.8696	43	13.9535	71	26.7606	34	26.4706	19	42.1053	22	50	16	50	54	44.4444	36	47.2222	32	3.125
A-1T;C106A	0.00121341	0.000529082	2.96657	2.21778	58.095	5.81544	55.1284	6.22398	27.75		A-1T;C106A	33	12.1212	31	0	31	9.67742	30	16.6667	40	25	50	26	23	43.4783	10	30	22	50	20	55	20	60	23	65.2174	14	0
A-1T;C106G	0.0124456	0.0136706	19.7688	6.41905	97.5014	23.5916	77.7326	24.4492	9.75		A-1T;C106G	12	16.6667	5	20	12	8.33333	14	35.7143	17	17.6471	21	33.3333	11	45.4545	7	14.2857	3	66.6667	6	83.3333	6	100	3	33.3333	10	20
A-1T;C106T	0.00141095	0.000514046	13.9525	2.43857	66.7829	3.8339	52.8304	4.54372	51.8333		A-1T;C106T	81	13.5802	41	9.7561	95	21.0526	40	15	61	37.7049	71	36.6197	37	37.8378	28	60.7143	34	67.6471	42	66.6667	48	62.5	44	65.9091	32	6.25
A-1T;T107A	0.00531757	0.00259907	12.3461	1.61437	46.233	4.43678	33.8869	4.72135	70.75		A-1T;T107A	95	10.5263	56	14.2857	107	13.0841	70	17.1429	94	14.8936	113	20.354	67	17.9104	45	31.1111	41	43.9024	39	51.2821	57	36.8421	65	43.0769	65	13.8462
A-1T;T107C	0.00198687	0.00109026	3.78392	2.38125	48.341	6.11897	44.5571	6.56598	48.75		A-1T;T107C	66	12.1212	34	5.88235	66	1.51515	40	22.5	67	13.4328	70	20	56	30.3571	33	42.4242	37	35.1351	25	52	39	43.5897	52	48.0769	31	16.129
A-1T;T107G	0.00339099	0.00223773	5.73149	3.21671	55.8559	7.92289	50.1244	8.55099	15.5		A-1T;T107G	17	11.7647	10	0	25	4	8	0	20	20	24	12.5	11	27.2727	12	33.3333	13	69.2308	12	33.3333	19	57.8947	15	46.6667	9	22.2222
A-1T;T108A	0.000470024	0.000175641	5.68265	2.8836	60.0752	3.88444	54.3926	4.83777	88		A-1T;T108A	118	12.7119	68	2.94118	113	17.6991	92	21.7391	134	33.5821	121	49.5868	81	53.0864	49	65.3061	62	56.4516	67	62.6866	69	50.7246	82	57.3171	72	15.2778
A-1T;T108C	0.000662939	0.000248549	8.44412	3.02685	65.8798	4.2554	57.4356	5.22209	70.5		A-1T;T108C	94	8.51064	69	10.1449	97	19.5876	65	18.4615	96	28.125	96	54.1667	59	59.322	52	55.7692	45	64.4444	52	76.9231	72	54.1667	49	59.1837	55	7.27273
A-1T;T108G	0.00100753	0.00055219	6.29602	4.16585	72.3847	8.21752	66.0886	9.21314	15.6667		A-1T;T108G	30	3.33333	15	20	15	20	17	5.88235	20	45	27	40.7407	19	57.8947	8	50	10	80	7	42.8571	7	57.1429	13	84.6154	11	0
A-1T;T109A	0.000621105	0.000188063	8.92724	2.32398	63.4087	3.21755	54.4814	3.96907	97		A-1T;T109A	154	11.039	88	9.09091	140	17.1429	85	17.6471	130	30	121	54.5455	67	61.194	60	60	65	60	79	58.2278	93	64.5161	82	56.0976	89	10.1124
A-1T;T109C	0.00116777	0.000491129	8.22642	3.33096	70.0487	5.42416	61.8223	6.36529	66.4167		A-1T;T109C	111	12.6126	63	7.93651	87	16.092	72	6.94444	93	35.4839	88	45.4545	47	59.5745	39	58.9744	41	63.4146	33	57.5758	65	70.7692	58	68.9655	51	11.7647
A-1T;T109G	0.000602683	0.000829809	18.1454	8.88101	55.359	8.60192	37.2136	12.3639	9.58333		A-1T;T109G	17	23.5294	6	16.6667	14	14.2857	11	18.1818	10	40	15	46.6667	7	42.8571	3	100	7	42.8571	5	60	11	27.2727	9	66.6667	4	25
A-1T;G110A	0.000827268	0.000498894	5.03645	2.94283	42.3027	5.37047	37.2663	6.1239	36.3333		A-1T;G110A	54	3.7037	19	10.5263	41	7.31707	47	12.766	49	14.2857	64	32.8125	31	35.4839	26	26.9231	22	50	16	68.75	33	39.3939	34	29.4118	29	20.6897
A-1T;G110C	3e-07	2.15496e-05	4.55411	3.1771	19.3206	2.396	14.7665	3.97929	7.08333		A-1T;G110C	10	0	3	33.3333	14	21.4286	6	16.6667	11	18.1818	12	16.6667	2	0	8	12.5	4	0	2	0	6	33.3333	7	14.2857	9	11.1111
A-1T;G110T	0.0023984	0.00205492	5.35157	2.93019	36.5039	6.01432	31.1523	6.69015	20.25		A-1T;G110T	26	7.69231	15	13.3333	26	3.84615	16	0	27	11.1111	28	17.8571	20	30	10	10	11	45.4545	15	40	28	35.7143	21	28.5714	12	0
A-1T;A111C	0.00250862	0.00566152	5.56966	5.37841	26.2093	11.2754	20.6397	12.4925	8.41667		A-1T;A111C	12	16.6667	6	50	18	0	3	0	8	12.5	19	5.26316	3	33.3333	1	0	9	55.5556	5	40	9	11.1111	8	12.5	0	NA
A-1T;A111G	0.00944793	0.00779342	13.3632	2.36202	48.2732	7.77724	34.91	8.12801	45.9167		A-1T;A111G	66	12.1212	31	22.5806	66	18.1818	40	10	53	11.3208	78	14.1026	41	24.3902	24	33.3333	39	25.641	21	57.1429	41	43.9024	51	41.1765	21	14.2857
A-1T;A111T	0.00299738	0.00141525	10.0568	2.07532	51.787	4.82609	41.7302	5.25339	92.1667		A-1T;A111T	119	10.9244	95	9.47368	151	11.2583	83	15.6627	128	16.4062	142	19.0141	67	28.3582	41	53.6585	53	52.8302	67	37.3134	79	58.2278	81	43.2099	69	4.34783
A-1T;T112A	0.000197994	0.00019108	3.86017	2.03017	17.8185	2.52418	13.9583	3.2393	46.0833		A-1T;T112A	88	3.40909	27	3.7037	70	8.57143	36	5.55556	52	23.0769	55	14.5455	38	13.1579	33	30.303	45	17.7778	29	20.6897	47	17.0213	33	9.09091	32	3.125
A-1T;T112C	0.00213137	0.00434594	11.5728	2.23312	19.4399	3.35325	7.86709	4.02879	45.5		A-1T;T112C	69	13.0435	46	10.8696	61	11.4754	43	13.9535	57	7.01754	65	16.9231	34	20.5882	30	16.6667	21	19.0476	27	25.9259	56	12.5	37	24.3243	28	7.14286
A-1T;T112G	3e-07	7.12831e-05	24.2651	30.1956	17.322	6.10911	-6.94313	30.8074	2.91667		A-1T;T112G	1	0	4	0	3	33.3333	2	50	5	0	1	100	5	0	4	0	4	0	3	33.3333	2	50	1	0	2	0
A-1T;A113C	0.00479598	0.00685906	8.8477	11.1449	72.232	21.0614	63.3843	23.8284	5.16667		A-1T;A113C	13	7.69231	0	NA	4	50	4	0	6	0	15	20	4	0	2	100	2	100	1	0	4	100	7	28.5714	4	50
A-1T;A113G	0.0037733	0.00198257	11.0699	2.77309	61.5388	6.42261	50.4688	6.99571	29.6667		A-1T;A113G	37	8.10811	20	20	41	12.1951	23	8.69565	53	15.0943	54	31.4815	21	19.0476	13	38.4615	24	62.5	19	47.3684	27	59.2593	24	58.3333	21	0
A-1T;A113T	0.00139294	0.00111279	4.77104	2.95721	42.8067	7.14701	38.0356	7.73465	52.1667		A-1T;A113T	87	8.04598	48	2.08333	87	5.74713	32	6.25	58	27.5862	78	24.359	52	21.1538	29	20.6897	29	65.5172	27	37.037	52	51.9231	47	31.9149	48	8.33333
[truncated: 132,826 more rows]

## Sheet: Replicate B (Preliminary Eval)
Variant	Reads - 0 M Gly	Percent FL - 0 M Gly	Reads - 500 uM Gly	Percent FL - 500 uM Gly	Reads - 40 mM Gly	Percent FL - 40 mM Gly
[truncated: 134,710 more rows]
